# Supplementary material for: Development of synovial sarcoma organoids exhibiting ferroptosis resistance despite low malic enzyme 1 expression
Source: Sci Rep. 2025 Dec 21;16:2369. doi: 10.1038/s41598-025-32030-w (PMC12816075; doi:10.1038/s41598-025-32030-w)
Supplement: Supplementary file 1 — Supplementary Material 1 [file 41598_2025_32030_MOESM1_ESM.xlsx]

## Sheet: Sheet1
Name		Sequence	Experiment
TBP	Forward	CCACTCACAGACTCTCACAAC	qPCR
	Reverse	CTGCGGTACAATCCCAGAACT
SS18-SSX1	Forward	CCAGCAGAGGCCTTATGGAT	qPCR
	Reverse	GGTGCAGTTGTTTCCCATCG
SS18-SSX1	Forward	GTGGACAAGGTCCTCCAGAA	RT-PCR
	Reverse	GCAGTTGTTTCCCATCGTTT
SS18-SSX2	Forward	GTGGACAAGGTCCTCCAGAA	RT-PCR
	Reverse	CTTTTGGGTCCCTGTTGTGT
GAPDH	Forward	GGTGAAGGTCGGAGTCAACG	RT-PCR
	Reverse	GGTCATGAGTCCTTCCACGAT
SS18-SSX1		CCAAGAGTTCGATGTTAGT	shRNA
