# Supplementary material for: Development of synovial sarcoma organoids exhibiting ferroptosis resistance despite low malic enzyme 1 expression
Source: Sci Rep. 2025 Dec 21;16:2369. doi: 10.1038/s41598-025-32030-w (PMC12816075; doi:10.1038/s41598-025-32030-w)
Supplement: Supplementary file 2 — Supplementary Material 2 [file 41598_2025_32030_MOESM2_ESM.xlsx]

## Sheet: Sheet 1
Symbol	ExpMean	Exp Samples A	Exp Samples B	log2FC	lfcSE	Stat	p-value	padj
CCDC69	28.6029	76.7224	4.54314	-3.80955	0.354466	-19.3909	9.21485e-84	2.59527e-79
LMOD1	14.0155	40.5812	0.732639	-4.58489	0.382218	-19.1661	7.10297e-82	1.00024e-77
MFAP5	24.8017	63.3562	5.52447	-3.30215	0.407523	-18.7802	1.09766e-78	1.03049e-74
SQOR	9.33438	24.9149	1.54412	-3.34854	0.294227	-18.7163	3.64359e-78	2.56545e-74
CACNA1G	27.6282	0.180017	41.3523	5.16556	0.398617	17.5877	3.06242e-69	1.725e-65
DLG4	76.1733	3.7378	112.391	4.58095	0.199868	16.4029	1.82404e-60	8.56203e-57
SORBS1	60.2821	170.151	5.34755	-4.75293	0.384716	-15.8092	2.68886e-56	1.08184e-52
EFNB3	26.2268	0.537895	39.0712	4.70354	0.312483	15.6743	2.26731e-55	7.98208e-52
GPD1	147.296	440.392	0.747168	-7.9809	0.71089	-15.4461	8.00956e-54	2.50646e-50
ACADS	13.717	37.0653	2.04285	-3.64498	0.379218	-15.3484	3.62923e-53	1.02214e-49
ANXA11	82.5738	136.804	55.4585	-1.28736	0.182262	-15.1071	1.45342e-51	3.72128e-48
MAOB	20.2713	57.5217	1.64617	-4.46699	0.466331	-15.0348	4.3416e-51	1.01897e-47
ITM2C	324.472	14.2247	479.596	4.98034	0.251588	14.6975	6.68436e-49	1.44814e-45
ME1	7.88436	22.3296	0.661748	-3.81139	0.422594	-14.6489	1.36867e-48	2.75337e-45
PPP1R1A	82.7544	237.099	5.58227	-5.17683	0.480142	-14.4348	3.12582e-47	5.86903e-44
PLA2G16	60.7367	179.584	1.31299	-6.28677	0.622293	-13.9834	1.96917e-44	3.46624e-41
ABCA10	5.98271	12.6288	2.65966	-1.89688	0.227368	-13.9767	2.1614e-44	3.58081e-41
GBE1	20.7701	49.016	6.64723	-2.70938	0.295414	-13.9677	2.45467e-44	3.84074e-41
MAGED4	28.7281	1.02615	42.5791	4.42682	0.34404	13.7531	4.87915e-43	7.23245e-40
CFD	186.743	555.145	2.54255	-7.29453	0.626223	-13.7319	6.54108e-43	9.21115e-40
PRAME	127.77	1.04116	191.134	6.55658	0.48339	13.6097	3.50803e-42	4.70477e-39
CD36	426.167	1254.39	12.0567	-6.5872	0.616129	-13.0915	3.68448e-39	4.71681e-36
BRSK1	31.4878	0.754823	46.8543	4.76925	0.347327	13.0269	8.59805e-39	1.05285e-35
SOD2	60.5242	142.153	19.7098	-2.78917	0.268402	-12.8146	1.35876e-37	1.5945e-34
TMEM132A	58.467	2.37346	86.5138	4.69721	0.330703	12.7051	5.54161e-37	6.24296e-34
RHOQ	67.9495	121.99	40.9294	-1.5525	0.228555	-12.6258	1.5209e-36	1.64749e-33
CYSTM1	44.6659	100.087	16.9553	-2.49311	0.31846	-12.5244	5.48861e-36	5.72523e-33
PABPC1L	60.5791	2.32032	89.7084	4.77184	0.322078	12.4512	1.37681e-35	1.37217e-32
PLIN2	54.623	118.928	22.4704	-2.35326	0.268113	-12.4492	1.4129e-35	1.37217e-32
LBP	2.65913	7.82737	0.0750162	-3.03763	0.657993	-12.3323	6.06672e-35	5.69544e-32
ZNF711	19.1035	0.765078	28.2727	4.05175	0.32605	12.2732	1.26226e-34	1.14678e-31
GBP2	12.4454	34.7968	1.26971	-3.97925	0.51716	-12.1981	3.18083e-34	2.79953e-31
SYNPO2	34.0345	100.499	0.802059	-5.81568	0.754745	-12.1933	3.37345e-34	2.87908e-31
AJUBA	36.9913	1.35535	54.8093	4.56649	0.27203	12.0829	1.29985e-33	1.07674e-30
G0S2	243.467	729.572	0.414566	-9.01252	0.940164	-12.0417	2.14361e-33	1.72493e-30
GPR162	40.3955	1.36742	59.9096	4.68528	0.340751	12.0171	2.88884e-33	2.26004e-30
ARMCX2	60.9171	6.42162	88.1648	3.58667	0.180505	11.9469	6.7381e-33	5.12897e-30
CD300LG	8.29709	24.598	0.146641	-4.48055	0.651344	-11.9102	1.04671e-32	7.75776e-30
HMGN1	171.383	33.2648	240.442	2.81688	0.138817	11.9073	1.08469e-32	7.83314e-30
CPT1C	86.4529	2.65082	128.354	5.14696	0.392505	11.8136	3.31903e-32	2.33693e-29
MITF	7.7877	14.6354	4.36387	-1.54347	0.381193	-11.8068	3.60104e-32	2.47365e-29
DAPK2	8.58142	20.1979	2.77316	-2.49008	0.415234	-11.8041	3.7194e-32	2.49413e-29
HELLS	14.1196	0.888639	20.7351	3.52461	0.348646	11.682	1.57603e-31	1.03226e-28
TNIP1	46.9204	91.8477	24.4568	-1.86681	0.270367	-11.6454	2.4211e-31	1.54972e-28
PLPP2	25.0458	1.24085	36.9482	4.08192	0.255185	11.6389	2.61364e-31	1.63579e-28
KCNG1	15.7469	0.319662	23.4606	4.21222	0.411474	11.6299	2.90358e-31	1.77775e-28
GLI1	53.6649	0.842877	80.076	5.45924	0.402258	11.5344	8.85176e-31	5.30427e-28
ABCA9	14.7148	35.9095	4.11744	-2.8505	0.33285	-11.5059	1.23235e-30	7.10612e-28
SDK2	13.7091	0.0811647	20.5231	4.31523	0.545041	11.5056	1.23633e-30	7.10612e-28
MGST3	171.495	296.977	108.753	-1.44094	0.246678	-11.4794	1.67424e-30	9.43064e-28
SMO	42.4148	3.3649	61.9397	3.84995	0.276195	11.4642	1.99683e-30	1.10272e-27
NTNG2	34.3837	0.545256	51.303	5.08098	0.53822	11.4568	2.1729e-30	1.17687e-27
RGN	2.50203	6.28326	0.611418	-2.17625	0.385687	-11.449	2.37827e-30	1.2638e-27
ABCA6	5.32149	13.6613	1.1516	-2.76852	0.364108	-11.4446	2.5027e-30	1.3053e-27
PDK4	70.1505	206.047	2.20224	-6.01473	0.726641	-11.4115	3.66268e-30	1.87556e-27
IQCA1	28.5012	1.15111	42.1762	4.32708	0.415473	11.3755	5.53579e-30	2.7841e-27
FBXL19	23.117	3.56253	32.8942	2.89313	0.197599	11.3526	7.19496e-30	3.55507e-27
ACSL1	79.3725	222.24	7.93879	-4.64237	0.532934	-11.2705	1.83423e-29	8.90676e-27
CAVIN2	8.54302	22.7063	1.46141	-3.26771	0.476181	-11.2644	1.96675e-29	9.24883e-27
GLRX	16.5654	38.34	5.67803	-2.5585	0.338911	-11.2642	1.97035e-29	9.24883e-27
SSPO	11.8389	0.198038	17.6593	3.96115	0.432441	11.239	2.62473e-29	1.21185e-26
SHISA2	90.1862	1.77821	134.39	5.60683	0.417018	11.2296	2.9175e-29	1.3253e-26
ITGA7	64.7327	163.054	15.5718	-3.30737	0.415707	-11.2112	3.59274e-29	1.60613e-26
MAOA	25.9041	76.7238	0.494244	-5.70087	0.726082	-11.2017	3.99786e-29	1.75931e-26
SIX5	33.6423	7.78812	46.5694	2.43641	0.15261	11.1701	5.71437e-29	2.47599e-26
TNXB	7.66456	19.6227	1.68547	-2.94099	0.417053	-11.1646	6.07799e-29	2.59364e-26
AQP7	73.3384	217.115	1.45027	-6.476	0.727598	-11.138	8.19769e-29	3.44597e-26
CA11	92.4989	7.54208	134.977	3.99263	0.284212	11.1288	9.08204e-29	3.76157e-26
ABCA8	11.7593	23.3126	5.98261	-1.79986	0.399141	-11.0894	1.41226e-28	5.76448e-26
CALCOCO2	48.5997	64.9551	40.422	-0.671087	0.197375	-10.9973	3.93795e-28	1.5844e-25
CAD	34.5283	4.6996	49.4427	3.14571	0.212023	10.9697	5.34789e-28	2.12138e-25
HUNK	7.65967	0.775355	11.1018	2.76905	0.297926	10.9423	7.23152e-28	2.82873e-25
EPHB3	40.7019	0.989648	60.5581	4.95136	0.444246	10.9312	8.17536e-28	3.15412e-25
PHLDA3	27.2125	63.8117	8.91292	-2.70887	0.353213	-10.8102	3.07978e-27	1.17215e-24
PLIN4	181.291	541.17	1.35151	-7.84901	0.853476	-10.795	3.63359e-27	1.36448e-24
RTN4	209.23	382.427	122.631	-1.63291	0.280593	-10.7841	4.09307e-27	1.5168e-24
BTBD11	17.4281	0.294246	25.995	4.38251	0.527782	10.7615	5.23151e-27	1.91351e-24
SV2A	20.9266	0.296051	31.2419	4.63674	0.494424	10.7016	1.00072e-26	3.61336e-24
PPM1L	2.43706	5.12921	1.09099	-1.55152	0.31245	-10.6842	1.20702e-26	4.3031e-24
DBI	157.277	306.417	82.7071	-1.87678	0.275194	-10.6782	1.28705e-26	4.53105e-24
SALL2	21.8324	1.21077	32.1432	3.9061	0.312934	10.6587	1.58847e-26	5.52316e-24
SPR	6.91793	13.3635	3.69516	-1.61316	0.294189	-10.5869	3.42771e-26	1.17729e-23
FHL1	1155.06	3099.59	182.797	-4.07636	0.567786	-10.5854	3.48149e-26	1.18136e-23
RILP	10.0753	24.0797	3.07312	-2.62231	0.458111	-10.5713	4.04921e-26	1.35764e-23
HIBADH	29.3418	45.5121	21.2566	-1.06337	0.240666	-10.54	5.64826e-26	1.8715e-23
HADH	55.5092	97.1029	34.7124	-1.45787	0.261146	-10.531	6.22033e-26	2.03709e-23
DNAH14	33.0228	2.28281	48.3928	3.9113	0.356809	10.4648	1.2534e-25	4.05755e-23
CAST	58.6204	91.4269	42.2172	-1.09671	0.231118	-10.43	1.80967e-25	5.79176e-23
CYP4B1	4.11099	9.68926	1.32185	-2.20282	0.542869	-10.4224	1.95928e-25	6.20012e-23
HSDL2	32.6839	65.2677	16.392	-1.92988	0.340108	-10.4154	2.10819e-25	6.59723e-23
PODXL2	21.1011	1.8875	30.7079	3.45694	0.271248	10.4081	2.27797e-25	7.0502e-23
ECHS1	61.7136	99.2814	42.9296	-1.19079	0.235538	-10.386	2.87096e-25	8.78889e-23
BCL2L13	21.7606	35.4079	14.937	-1.19187	0.246777	-10.3498	4.19375e-25	1.27003e-22
PLN	66.1028	197.22	0.544213	-7.00409	1.01429	-10.311	6.28195e-25	1.88218e-22
IDH3A	36.14	49.2976	29.5612	-0.718789	0.213081	-10.2758	9.05614e-25	2.68481e-22
ZNF497	10.2336	0.705435	14.9976	3.22965	0.283389	10.2628	1.0362e-24	3.03996e-22
FANCG	32.3767	4.4098	46.3602	3.13003	0.214435	10.2526	1.15163e-24	3.34378e-22
P2RX6	6.92803	14.6141	3.08503	-1.93443	0.654613	-10.2471	1.21891e-24	3.50301e-22
LSP1	32.571	63.2191	17.2469	-1.81535	0.446308	-10.22	1.61418e-24	4.59209e-22
ZDHHC3	33.0111	31.5256	33.7538	0.0955946	0.125527	-10.1852	2.3077e-24	6.49941e-22
LPL	96.9534	276.081	7.38968	-5.04555	0.754718	-10.1638	2.8772e-24	8.02311e-22
MAGED4B	39.9872	1.07726	59.4421	4.8628	0.491855	10.1341	3.89799e-24	1.0763e-21
RARG	77.2729	9.02548	111.397	3.48685	0.233928	10.0994	5.56046e-24	1.52043e-21
SLC7A2	6.35206	18.5572	0.249496	-3.96828	0.804171	-10.0975	5.66713e-24	1.5347e-21
CHP1	31.346	37.2864	28.3758	-0.382205	0.16116	-9.97577	1.94595e-23	5.2196e-21
MB	1993.88	5976.35	2.64077	-10.681	1.32401	-9.9549	2.40057e-23	6.37827e-21
HTRA3	8.96436	25.1749	0.859091	-3.81551	0.58627	-9.93088	3.05548e-23	8.04248e-21
TINAGL1	23.0463	58.1969	5.47093	-3.19348	0.497143	-9.92779	3.15167e-23	8.21884e-21
PDLIM3	296.593	881.34	4.21967	-7.40123	1.03295	-9.90233	4.06693e-23	1.05084e-20
KIF1A	18.5092	0.0443597	27.7416	4.78245	0.843427	9.89914	4.19881e-23	1.07505e-20
VANGL2	13.1693	1.05208	19.2279	3.30119	0.365858	9.8759	5.29543e-23	1.34361e-20
SLC25A18	1.15966	2.56843	0.455273	-1.294	0.382593	-9.8421	7.41438e-23	1.86445e-20
NEFH	11.4895	0.145619	17.1615	3.98668	0.603366	9.82812	8.5198e-23	2.12347e-20
RAP1A	36.1984	49.9684	29.3135	-0.749642	0.187862	-9.82249	9.00893e-23	2.22568e-20
AUTS2	117.683	7.37248	172.838	4.37594	0.344192	9.81913	9.31477e-23	2.28123e-20
ARHGEF10L	11.4424	20.8279	6.74966	-1.49397	0.328917	-9.81607	9.60172e-23	2.33123e-20
ACSS2	50.58	80.296	35.7221	-1.14654	0.339227	-9.79886	1.13862e-22	2.74087e-20
PRRT1	15.9543	0.862609	23.5001	3.71739	0.415667	9.78104	1.35811e-22	3.24151e-20
TMEM140	13.5412	27.0727	6.77552	-1.85216	0.419196	-9.76158	1.64572e-22	3.89496e-20
SAMD11	29.8051	0.415856	44.4997	5.00611	0.507278	9.74638	1.91165e-22	4.48665e-20
FAM204A	34.0225	35.6006	33.2335	-0.0964592	0.12484	-9.7447	1.94344e-22	4.51236e-20
MAP3K20	36.506	82.381	13.5686	-2.51686	0.433099	-9.74412	1.95465e-22	4.51236e-20
CDK20	6.34002	0.779947	9.12005	2.50731	0.265336	9.73951	2.04536e-22	4.68338e-20
IL33	5.41121	11.6876	2.273	-1.95474	0.556896	-9.71667	2.56022e-22	5.81501e-20
ACACB	32.4547	72.2594	12.5523	-2.43448	0.382981	-9.70575	2.84977e-22	6.42088e-20
SCN4A	7.24866	21.3406	0.202673	-4.21535	0.935198	-9.68238	3.58277e-22	8.00834e-20
CASQ2	19.8212	52.185	3.63928	-3.51905	0.973791	-9.68109	3.62818e-22	8.04599e-20
STK36	62.2053	7.80142	89.4072	3.36063	0.209688	9.67916	3.69727e-22	8.13514e-20
MEX3A	17.3868	0.221007	25.9698	4.4652	0.615901	9.64749	5.03722e-22	1.09975e-19
AKAP1	26.0801	53.0806	12.5799	-1.99364	0.394356	-9.62042	6.55628e-22	1.42039e-19
PCGF5	9.1979	16.6235	5.4851	-1.4423	0.287273	-9.60701	7.46857e-22	1.60569e-19
EMC3	62.3023	96.1623	45.3723	-1.06713	0.235318	-9.59244	8.60229e-22	1.82849e-19
EXTL2	27.1629	4.45843	38.5151	2.85585	0.203527	9.59206	8.63478e-22	1.82849e-19
CLEC2B	6.36876	13.4945	2.80591	-1.92919	0.375434	-9.56905	1.0789e-21	2.26762e-19
MAP3K12	75.6941	11.5258	107.778	3.11842	0.32038	9.55856	1.19403e-21	2.49102e-19
GLUL	200.312	440.708	80.114	-2.44507	0.37572	-9.55515	1.23409e-21	2.55565e-19
RHPN1	19.5106	0.937914	28.797	3.94259	0.389616	9.55016	1.29497e-21	2.66216e-19
AC245297.1	25.6553	76.486	0.23997	-5.96556	1.07744	-9.54006	1.42746e-21	2.91326e-19
COMT	40.1895	56.8007	31.8839	-0.813703	0.211081	-9.53442	1.50724e-21	3.05394e-19
SEMA6A	43.4355	4.29132	63.0076	3.59654	0.329235	9.53343	1.52166e-21	3.06114e-19
ICAM5	15.8404	0.217184	23.652	4.34009	0.574521	9.53129	1.55335e-21	3.10272e-19
ESYT2	18.8695	26.8305	14.889	-0.808643	0.226055	-9.51353	1.84304e-21	3.65544e-19
WNT5A	35.673	1.4784	52.7702	4.43933	0.376841	9.4463	3.51019e-21	6.91335e-19
PTPRQ	0.427826	1.27648	0.003499	-1.18177	0.943083	-9.42013	4.50538e-21	8.81176e-19
CCDC120	10.5216	0.982359	15.2912	3.0388	0.279466	9.41413	4.77025e-21	9.26548e-19
SCARA5	11.2111	29.5209	2.05617	-3.32	0.528257	-9.40303	5.30121e-21	1.02262e-18
SHANK1	10.1262	0.648858	14.8648	3.26629	0.432811	9.39725	5.60081e-21	1.07307e-18
PPDPFL	142.322	426.602	0.182552	-8.49822	1.42538	-9.38236	6.45101e-21	1.22761e-18
MT2A	51.8114	111.05	22.1923	-2.27242	0.442944	-9.36315	7.73947e-21	1.46292e-18
CIT	6.92732	0.388405	10.1968	3.01158	0.416797	9.35789	8.13413e-21	1.52726e-18
STEAP4	5.4258	13.9563	1.16054	-2.79129	0.518632	-9.34306	9.35865e-21	1.74554e-18
JPH4	25.6935	0.447639	38.3164	4.76336	0.68438	9.33882	9.74177e-21	1.80505e-18
VLDLR	8.35816	21.6604	1.70706	-3.06537	0.492331	-9.33055	1.0532e-20	1.93871e-18
BMP7	68.167	0.539323	101.981	6.06394	0.681414	9.31995	1.16392e-20	2.1286e-18
CUX2	13.3455	0.187237	19.9247	4.13953	0.595637	9.3119	1.25567e-20	2.2816e-18
ANGPT1	4.39282	11.8129	0.682788	-2.92867	0.601669	-9.29267	1.50466e-20	2.71648e-18
LRP8	11.3693	0.720886	16.6935	3.36199	0.474698	9.27758	1.73373e-20	3.11012e-18
VAMP3	40.3178	57.325	31.8142	-0.829796	0.231153	-9.27529	1.77132e-20	3.15743e-18
TMEM59L	61.4181	0.671367	91.7915	5.79489	0.641352	9.26796	1.89737e-20	3.36084e-18
RETREG1	15.6147	41.4353	2.70434	-3.51798	0.634947	-9.25999	2.04455e-20	3.59892e-18
MARCKSL1	166.448	8.89897	245.222	4.63654	0.397493	9.25448	2.15273e-20	3.76581e-18
SRL	28.1572	83.7641	0.353811	-5.96835	1.08967	-9.24106	2.44075e-20	4.24328e-18
GLI2	13.077	1.16571	19.0326	3.20944	0.345988	9.23824	2.50597e-20	4.32994e-18
GPR27	12.3459	0.49629	18.2708	3.68695	0.419145	9.23593	2.56043e-20	4.39706e-18
FRY	9.48962	18.6328	4.91803	-1.73008	0.446644	-9.22562	2.81925e-20	4.81221e-18
PNMA3	9.23871	0.32976	13.6932	3.46591	0.443947	9.22484	2.83975e-20	4.818e-18
COX14	54.6136	91.9252	35.9578	-1.33019	0.291845	-9.21999	2.97127e-20	5.01094e-18
IL18	3.46188	8.95876	0.713445	-2.53907	0.55003	-9.20072	3.55567e-20	5.96083e-18
KIF26B	8.70859	0.172898	12.9764	3.57485	0.557912	9.18034	4.29741e-20	7.16167e-18
MYL2	3297.86	9889.9	1.83567	-11.7682	1.57506	-9.13552	6.50908e-20	1.07836e-17
TOP2A	19.4561	0.624653	28.8718	4.20058	0.53582	9.12757	7.00523e-20	1.15377e-17
SLITRK4	0.678396	1.79865	0.118271	-1.32346	0.623285	-9.12573	7.12521e-20	1.16671e-17
TNFRSF1B	5.36	12.1542	1.96291	-2.15043	0.419653	-9.12457	7.20233e-20	1.17252e-17
TUBB2B	62.5772	2.64174	92.545	4.68296	0.451064	9.1198	7.52641e-20	1.20793e-17
FJX1	64.616	0.532162	96.6579	5.9941	0.702451	9.11976	7.52927e-20	1.20793e-17
DVL2	43.5808	8.12614	61.3081	2.77134	0.171172	9.11948	7.54848e-20	1.20793e-17
KIAA0895L	28.119	5.32196	39.5175	2.6801	0.21321	9.11364	7.96611e-20	1.26756e-17
AC051649.2	2.14727	5.61557	0.413125	-2.22698	0.582862	-9.10251	8.8266e-20	1.39659e-17
GPR173	21.3292	0.554128	31.7167	4.39585	0.46646	9.09643	9.33511e-20	1.46879e-17
KIF11	6.24323	0.387691	9.17101	2.8737	0.378045	9.09405	9.54166e-20	1.49295e-17
CENPF	14.2009	0.835318	20.8837	3.57575	0.398693	9.08256	1.06051e-19	1.65018e-17
ALDH2	80.8496	193.733	24.4082	-2.93813	0.390791	-9.06702	1.22319e-19	1.89285e-17
ITGAE	31.0974	35.7716	28.7603	-0.305202	0.153486	-9.06439	1.25307e-19	1.92849e-17
PFKFB1	8.16213	23.0288	0.728769	-3.79695	0.714558	-9.06158	1.28578e-19	1.96808e-17
CRLF1	199.052	9.21588	293.969	4.85168	0.460051	9.05726	1.33774e-19	2.03608e-17
C3	88.9655	228.32	19.2882	-3.49865	0.593241	-9.05669	1.34467e-19	2.03608e-17
C14orf180	10.4599	31.2218	0.0789302	-4.90036	1.04594	-9.05007	1.42878e-19	2.15188e-17
CHST8	20.8916	0.117124	31.2788	4.85273	0.793687	9.02997	1.71718e-19	2.57248e-17
ST6GALNAC2	3.05313	8.63739	0.261007	-2.93407	0.860253	-9.02657	1.7713e-19	2.63952e-17
SLC4A3	13.6239	0.641837	20.1149	3.68488	0.392762	9.01163	2.03013e-19	3.0093e-17
PPP1R3C	29.1617	86.377	0.554021	-5.81318	1.00797	-8.98862	2.50353e-19	3.69159e-17
CGREF1	20.6756	1.9054	30.0607	3.41828	0.309546	8.98793	2.51923e-19	3.69539e-17
WNK3	1.33221	0.0723673	1.96212	1.46583	0.374996	8.97103	2.93756e-19	4.2867e-17
LGALS3	66.2591	180.823	8.97722	-4.18775	0.615923	-8.96626	3.06754e-19	4.44144e-17
CKMT2	81.2154	239.113	2.26666	-6.19975	1.04492	-8.96599	3.07513e-19	4.44144e-17
RORC	6.31091	18.5704	0.181167	-4.05039	0.918763	-8.9632	3.1539e-19	4.53196e-17
VASH2	9.2085	1.67911	12.9732	2.38284	0.309823	8.95557	3.3799e-19	4.83205e-17
RNF215	23.4728	4.70716	32.8556	2.56855	0.171455	8.94022	3.88393e-19	5.52459e-17
DDO	1.25531	3.64038	0.0627713	-2.12641	0.84113	-8.93616	4.02922e-19	5.70245e-17
ZNF280B	2.16546	0.0819223	3.20722	1.95927	0.442339	8.93107	4.219e-19	5.9412e-17
SLC22A3	2.32402	5.86155	0.555247	-2.14139	0.509908	-8.91411	4.91744e-19	6.89028e-17
AP1S2	27.2631	67.4562	7.16648	-3.06739	0.492196	-8.90708	5.23935e-19	7.305e-17
FDX1	7.21193	9.65585	5.98998	-0.608286	0.224925	-8.89943	5.61341e-19	7.78799e-17
EZH2	16.3262	1.7928	23.5928	3.13846	0.296336	8.89759	5.7075e-19	7.8797e-17
NSMF	65.3902	6.91072	94.6299	3.59558	0.282024	8.89213	5.99475e-19	8.2359e-17
MUSTN1	134.81	398.962	2.73399	-6.743	1.04315	-8.86525	7.63359e-19	1.04365e-16
B4GALNT4	36.4626	0.266571	54.5607	5.45506	0.819516	8.85504	8.36525e-19	1.13816e-16
EFNA4	13.421	1.215	19.524	3.21193	0.304891	8.84355	9.27286e-19	1.25558e-16
HSPB7	103.169	303.874	2.81607	-6.31998	0.958887	-8.81994	1.14517e-18	1.54318e-16
RPL22L1	145.486	13.2362	211.612	3.90059	0.317747	8.79505	1.42984e-18	1.91762e-16
THRSP	45.1174	135.066	0.143019	-6.89532	1.17043	-8.7892	1.50624e-18	2.01051e-16
HEBP2	31.0264	69.9526	11.5633	-2.49764	0.418863	-8.78862	1.51408e-18	2.01144e-16
REEP5	38.8668	43.1884	36.706	-0.228875	0.191031	-8.7746	1.71514e-18	2.26785e-16
TMOD1	12.4623	36.9514	0.217723	-4.96189	1.00512	-8.7664	1.84472e-18	2.42779e-16
FAM189A2	5.35925	14.7348	0.671467	-3.23477	0.659473	-8.75672	2.0101e-18	2.63314e-16
COQ8A	122.692	313.556	27.26	-3.47648	0.642118	-8.75323	2.07323e-18	2.70326e-16
MT1X	116.261	304.358	22.2122	-3.71755	0.639981	-8.74144	2.30166e-18	2.98728e-16
RCAN2	7.8585	20.3345	1.62051	-3.02527	0.631187	-8.72725	2.60943e-18	3.37119e-16
NLGN3	17.8727	0.270381	26.6739	4.44519	0.625198	8.72591	2.64042e-18	3.39566e-16
MYOM1	83.4369	237.012	6.64923	-4.95958	0.891133	-8.7215	2.74549e-18	3.51473e-16
FAM107A	4.68009	11.256	1.39215	-2.3571	0.556419	-8.6985	3.363e-18	4.28577e-16
SYNM	47.4802	135.953	3.24399	-5.01211	0.821926	-8.68881	3.66263e-18	4.64659e-16
TRIM38	1.98477	3.68035	1.13699	-1.13104	0.365725	-8.67253	4.22605e-18	5.33733e-16
IGFBP2	213.994	15.4195	313.281	4.25857	0.340692	8.67165	4.25902e-18	5.35496e-16
ETV4	30.1015	0.928403	44.688	4.56634	0.535804	8.65115	5.09825e-18	6.38165e-16
NRSN1	5.68298	16.3042	0.372354	-3.6564	0.753759	-8.6374	5.75085e-18	7.16668e-16
AGTR1	3.89353	10.686	0.4973	-2.96434	0.669838	-8.62579	6.36519e-18	7.89732e-16
FKBP10	307.54	16.6508	452.985	4.68484	0.409846	8.62476	6.42292e-18	7.93399e-16
FOXO4	12.4984	20.2207	8.63727	-1.13878	0.332913	-8.62263	6.54357e-18	8.04773e-16
MDH1	156.571	251.692	109.011	-1.19973	0.338735	-8.61702	6.87205e-18	8.41497e-16
ASPM	2.30505	0.077047	3.41905	2.03665	0.542642	8.61313	7.10927e-18	8.66777e-16
COL5A1	148.725	12.845	216.664	3.97467	0.355138	8.61197	7.18141e-18	8.71798e-16
MEIS3	61.4131	4.96897	89.6351	3.92452	0.371067	8.61002	7.305e-18	8.82996e-16
SYNGAP1	23.5834	3.12683	33.8117	3.07647	0.299241	8.60366	7.72107e-18	9.293e-16
PNMA8A	18.9887	1.3798	27.7932	3.59681	0.406081	8.60282	7.77811e-18	9.32181e-16
ACOT2	27.7447	43.5809	19.8266	-1.098	0.257892	-8.59734	8.15872e-18	9.73653e-16
SOX12	17.4716	1.26951	25.5727	3.54949	0.346093	8.594	8.3995e-18	9.98158e-16
ATF7IP2	22.2199	1.86844	32.3956	3.54132	0.326722	8.57883	9.58413e-18	1.13188e-15
JPH2	11.1043	32.528	0.392414	-4.58971	0.954713	-8.57858	9.60513e-18	1.13188e-15
ACAT1	94.7532	196.344	43.9576	-2.13408	0.5178	-8.56324	1.09737e-17	1.28777e-15
CHST10	15.3591	2.15091	21.9631	2.86548	0.268376	8.55859	1.14255e-17	1.33522e-15
CBX5	28.0273	4.41249	39.8347	2.91543	0.25638	8.55095	1.22078e-17	1.42075e-15
SNX21	20.8137	29.4906	16.4753	-0.803047	0.220806	-8.54927	1.23867e-17	1.43563e-15
SH3GLB1	36.0956	43.9553	32.1658	-0.438797	0.246646	-8.54433	1.29282e-17	1.49226e-15
SUCLG1	68.3279	84.3306	60.3266	-0.47655	0.257781	-8.53739	1.37285e-17	1.57816e-15
ZWILCH	11.2843	2.41803	15.7174	2.29011	0.203404	8.52435	1.53665e-17	1.75928e-15
KLHL41	405.352	1212.62	1.72006	-8.80146	1.32551	-8.52257	1.56047e-17	1.77932e-15
FKBP5	13.909	31.4853	5.12082	-2.40799	0.478632	-8.52152	1.57476e-17	1.78837e-15
PPP1R12B	9.17813	20.9549	3.28976	-2.35557	0.579249	-8.51931	1.605e-17	1.81539e-15
LDB3	238.875	710.97	2.82756	-7.53925	1.14219	-8.51472	1.66999e-17	1.88135e-15
CHCHD10	196.927	517.053	36.8634	-3.77423	0.645545	-8.49564	1.96851e-17	2.20881e-15
CDCA3	13.4633	1.25011	19.5699	3.19247	0.403722	8.49388	1.9985e-17	2.23356e-15
CA4	6.28975	15.9071	1.48107	-2.7686	0.53746	-8.4926	2.02069e-17	2.24943e-15
ATP8A2	2.83042	0.126942	4.18217	2.20114	0.45166	8.49053	2.0569e-17	2.28073e-15
RTF2	54.5783	50.8259	56.4545	0.148748	0.143766	-8.4827	2.20035e-17	2.43023e-15
PAFAH1B3	51.0018	4.60202	74.2017	3.74674	0.380566	8.48147	2.22366e-17	2.44637e-15
COX6A2	616.18	1845.1	1.71815	-9.40765	1.42885	-8.47171	2.41807e-17	2.6499e-15
PRRT2	47.6142	3.26407	69.7893	4.05323	0.36662	8.454	2.8149e-17	3.07282e-15
DZIP1	32.0781	2.70073	46.7668	3.69013	0.321657	8.44924	2.93212e-17	3.18843e-15
HSPB8	41.0152	117.541	2.75217	-4.98152	0.869393	-8.44691	2.99104e-17	3.23999e-15
P3H4	37.9624	3.38516	55.251	3.68118	0.341256	8.44376	3.07284e-17	3.30836e-15
CACNG4	14.7475	0.358226	21.9421	4.0782	0.594301	8.44358	3.07766e-17	3.30836e-15
FOXN3	26.4863	37.0633	21.1978	-0.777986	0.261132	-8.44302	3.09239e-17	3.31156e-15
CEBPB	31.8185	64.8177	15.319	-2.01192	0.398645	-8.44197	3.12043e-17	3.32893e-15
CXXC4	8.16999	0.501285	12.0043	3.11472	0.459266	8.43919	3.19538e-17	3.39603e-15
STK40	17.2172	25.851	12.9003	-0.949866	0.261705	-8.43402	3.3398e-17	3.53617e-15
COPZ2	44.4953	95.4673	19.0092	-2.26938	0.420146	-8.43245	3.38515e-17	3.57076e-15
S100A1	179.509	522.854	7.83707	-5.88945	0.868137	-8.4245	3.62307e-17	3.80746e-15
TCAP	636.685	1901.36	4.34669	-8.47493	1.22136	-8.41336	3.98425e-17	4.17146e-15
BCAR3	7.953	10.7531	6.55295	-0.637927	0.323571	-8.41284	4.0021e-17	4.17463e-15
MARC2	8.46396	18.4806	3.45565	-2.12833	0.480415	-8.40813	4.16607e-17	4.32964e-15
SUCO	132.943	4.52094	197.154	5.16556	0.509406	8.40481	4.28544e-17	4.43732e-15
DNASE1	15.2524	2.53454	21.6114	2.67745	0.189836	8.40414	4.31022e-17	4.44664e-15
LMOD3	38.6272	115.445	0.218161	-6.5788	1.25301	-8.40062	4.44145e-17	4.56529e-15
FTH1	2482.09	5075.58	1185.35	-2.09733	0.358928	-8.39046	4.84248e-17	4.95941e-15
ZNF524	8.05984	13.4187	5.38043	-1.17621	0.333816	-8.37299	5.61726e-17	5.73204e-15
RNF181	75.9935	81.4091	73.2857	-0.14972	0.170159	-8.36808	5.8563e-17	5.9544e-15
MLIP	13.5063	39.4524	0.533293	-4.72152	1.03532	-8.35234	6.69254e-17	6.78017e-15
CUTC	43.1382	102.577	13.4188	-2.84468	0.576463	-8.35039	6.80391e-17	6.86829e-15
ATP1A2	93.8758	238.972	21.3277	-3.42596	0.742483	-8.34938	6.86244e-17	6.90264e-15
ADGRB1	22.8001	0.174796	34.1128	4.90152	0.761575	8.33901	7.49178e-17	7.50884e-15
MYOT	194.892	569.418	7.62854	-6.04676	1.17578	-8.3338	7.82889e-17	7.8189e-15
SPX	2.14848	6.15565	0.1449	-2.64386	0.914671	-8.32268	8.59992e-17	8.55859e-15
RAI1	20.7364	2.6616	29.7738	3.07116	0.186014	8.32193	8.65437e-17	8.58245e-15
KLF9	18.8198	24.4718	15.9938	-0.583895	0.24579	-8.30832	9.70698e-17	9.59254e-15
PNMA2	13.3823	0.486383	19.8303	3.80881	0.552951	8.30602	9.89633e-17	9.74546e-15
APLP1	76.3885	1.84407	113.661	5.33327	0.650168	8.30383	1.00812e-16	9.89291e-15
FBXO40	9.54459	28.2776	0.178085	-4.63528	1.10682	-8.30079	1.03417e-16	1.01133e-14
SETD3	29.1943	43.5291	22.0269	-0.951431	0.288585	-8.29589	1.07776e-16	1.05031e-14
KDM5B	27.8596	3.37792	40.1004	3.23083	0.293956	8.29185	1.11502e-16	1.08288e-14
ADH1C	3.46233	10.3079	0.0395658	-3.44327	1.30033	-8.28862	1.14567e-16	1.10882e-14
TST	13.407	28.8401	5.6904	-2.15709	0.423657	-8.27756	1.25722e-16	1.21262e-14
CACNA1D	9.50943	0.402895	14.0627	3.4245	0.557829	8.27025	1.33682e-16	1.28499e-14
TSPAN8	4.24584	12.1658	0.285844	-3.35601	0.858578	-8.26509	1.39585e-16	1.33717e-14
DCN	259.985	736.134	21.9103	-5.00786	0.823618	-8.25648	1.50032e-16	1.43238e-14
TNNI1	644.223	1927.84	2.41291	-9.14252	1.47917	-8.23317	1.82325e-16	1.73479e-14
C19orf12	27.638	48.0738	17.4201	-1.41367	0.278047	-8.22839	1.89739e-16	1.79926e-14
PHYH	40.5602	97.9746	11.853	-2.94495	0.568987	-8.22089	2.02e-16	1.9091e-14
SLC24A3	3.99266	9.72796	1.12501	-2.33584	0.521035	-8.22043	2.02774e-16	1.91001e-14
CFL2	148.618	398.761	23.5458	-4.02559	0.679595	-8.21462	2.12834e-16	1.99809e-14
GPX3	237.447	655.941	28.2005	-4.4917	0.801072	-8.20997	2.21245e-16	2.07015e-14
PDHA1	147.879	213.112	115.263	-0.880977	0.286596	-8.20856	2.2386e-16	2.08768e-14
CA3	779.829	2311.61	13.938	-7.27439	1.20178	-8.20721	2.26389e-16	2.1043e-14
SPAAR	7.89927	12.1231	5.78737	-0.95118	0.383655	-8.20644	2.27844e-16	2.11085e-14
CDH24	13.7896	1.42995	19.9695	3.10929	0.319688	8.19849	2.43422e-16	2.24778e-14
FER1L4	22.5935	0.548579	33.6159	4.48242	0.528314	8.19666	2.47166e-16	2.2749e-14
H2AFY2	27.2069	2.69105	39.4649	3.45457	0.304494	8.19033	2.6051e-16	2.38991e-14
CADM1	80.5004	6.76203	117.37	3.93072	0.39474	8.17977	2.8438e-16	2.60041e-14
TNS1	54.1834	119.755	21.3977	-2.43065	0.452265	-8.17559	2.94416e-16	2.68347e-14
FBXW4	41.6871	47.3685	38.8464	-0.279617	0.210692	-8.17496	2.95969e-16	2.68893e-14
DWORF	115.954	344.885	1.48835	-7.11896	1.20756	-8.17264	3.0171e-16	2.73227e-14
SMIM12	12.1813	15.3425	10.6006	-0.494421	0.189409	-8.16835	3.1264e-16	2.82218e-14
CRYAB	871.987	2430.97	92.4975	-4.70105	0.842093	-8.15546	3.4785e-16	3.12998e-14
GCLM	6.95967	9.21214	5.83344	-0.579601	0.274405	-8.12854	4.3449e-16	3.89713e-14
SMTNL1	37.296	110.503	0.692366	-6.0419	1.14338	-8.12469	4.48491e-16	4.00994e-14
TROAP	11.7002	0.516309	17.2921	3.59259	0.583132	8.12335	4.53481e-16	4.04172e-14
CD99L2	32.242	42.3455	27.1902	-0.620687	0.24027	-8.12275	4.55732e-16	4.04897e-14
LRRC2	16.1868	46.3254	1.11742	-4.48223	0.880935	-8.11962	4.67658e-16	4.14186e-14
ZNF33B	12.6438	1.81877	18.0563	2.75713	0.246411	8.1172	4.77049e-16	4.21179e-14
GPRASP2	23.0274	3.97272	32.5548	2.75441	0.217342	8.10992	5.06522e-16	4.45803e-14
AAMDC	81.6349	150.935	46.9847	-1.66281	0.396073	-8.09957	5.51545e-16	4.83917e-14
PRAF2	56.5646	8.26133	80.7162	3.14133	0.278212	8.09581	5.68839e-16	4.9754e-14
SLC1A7	1.77186	3.78787	0.763858	-1.44065	0.490599	-8.07792	6.58832e-16	5.74469e-14
SLC25A20	23.9636	30.1909	20.8499	-0.5135	0.242176	-8.07565	6.71201e-16	5.82343e-14
BEX1	26.2014	0.203331	39.2005	5.06211	0.766253	8.0755	6.71998e-16	5.82343e-14
NSG1	66.8549	15.8614	92.3517	2.46896	0.457103	8.0694	7.06463e-16	6.10332e-14
DOC2A	12.6731	1.10993	18.4548	3.20486	0.476427	8.06377	7.39792e-16	6.37172e-14
SLPI	3.547	9.05147	0.794767	-2.48554	0.617838	-8.05826	7.73872e-16	6.64491e-14
PLPP1	29.329	57.1868	15.4001	-1.82699	0.382276	-8.0486	8.37461e-16	7.16908e-14
PRKCQ	6.42319	19.1709	0.0493183	-4.26475	1.28429	-8.04754	8.44762e-16	7.20966e-14
KIF23	9.71842	0.658041	14.2486	3.20113	0.445313	8.04297	8.76866e-16	7.44105e-14
KIF26B	3.59405	0	5.39107	2.67606	1.27315	8.04293	8.77159e-16	7.44105e-14
PDE4DIP	323.773	880.638	45.3409	-4.24983	0.767036	-8.0374	9.17652e-16	7.76118e-14
CLEC3B	94.5425	262.327	10.65	-4.49845	0.70347	-8.03643	9.24934e-16	7.79936e-14
MFGE8	54.079	109.546	26.3452	-2.01529	0.440257	-8.0321	9.58198e-16	8.05572e-14
MYLPF	509.168	1524.68	1.41034	-9.306	1.52801	-8.03152	9.62758e-16	8.06997e-14
KLHL34	3.88317	11.5469	0.0513112	-3.57707	1.21421	-8.02925	9.80676e-16	8.19578e-14
ALAS1	25.0992	31.54	21.8788	-0.508203	0.265184	-8.02329	1.02954e-15	8.57869e-14
CSMD2	9.3776	0.080034	14.0264	3.79835	0.742148	8.01665	1.08664e-15	9.02779e-14
CSDE1	309.826	454.365	237.557	-0.93269	0.322479	-8.01487	1.10255e-15	9.13303e-14
IQGAP3	4.06935	0.171526	6.01825	2.58272	0.452054	8.01074	1.14019e-15	9.41709e-14
FOXD2	3.9658	0.153153	5.87213	2.57517	0.47682	7.99736	1.27113e-15	1.04679e-13
HRCT1	4.7553	14.0472	0.109329	-3.76174	1.00992	-7.99451	1.30087e-15	1.06815e-13
MARCH2	24.5396	45.4952	14.0618	-1.62619	0.385571	-7.99366	1.30995e-15	1.07249e-13
PTK7	61.8668	3.15896	91.2208	4.4708	0.529725	7.98282	1.43022e-15	1.16756e-13
DES	1175.4	3489.38	18.4144	-7.49011	1.27216	-7.98072	1.45483e-15	1.18421e-13
ZNF286A	23.7754	5.17059	33.0778	2.46535	0.3141	7.97542	1.51862e-15	1.23258e-13
TGIF2	23.2531	2.02974	33.8648	3.5245	0.359504	7.97441	1.53105e-15	1.2391e-13
SRGAP3	17.9074	2.64151	25.5403	2.86558	0.416201	7.96266	1.68386e-15	1.35886e-13
ZNF106	49.3483	116.787	15.6289	-2.82441	0.585802	-7.9621	1.69139e-15	1.35907e-13
TRAF4	56.1358	3.3671	82.5201	4.25737	0.442827	7.96193	1.69377e-15	1.35907e-13
TPX2	12.0992	0.804657	17.7465	3.37682	0.379072	7.96085	1.70855e-15	1.36704e-13
CD38	1.54693	4.18839	0.226197	-2.0811	0.690476	-7.95483	1.79383e-15	1.4312e-13
DBNDD2	35.1381	82.7728	11.3208	-2.76538	0.56659	-7.95126	1.84618e-15	1.46881e-13
CDV3	62.8572	85.8626	51.3545	-0.730423	0.247074	-7.94908	1.87902e-15	1.49073e-13
ZBTB16	10.7441	24.3318	3.95022	-2.35539	0.560047	-7.93982	2.02482e-15	1.60189e-13
MOCS1	7.12514	14.7698	3.30282	-1.87381	0.419476	-7.92818	2.2238e-15	1.75437e-13
BTBD6	33.5294	54.2961	23.146	-1.19539	0.306984	-7.92758	2.23457e-15	1.75795e-13
ZNF793	13.0813	1.14238	19.0507	3.22636	0.319598	7.914	2.49258e-15	1.95546e-13
CORO6	49.9682	141.207	4.34891	-4.7326	0.827091	-7.91083	2.5567e-15	2.00019e-13
PDLIM5	148.938	430.757	8.02831	-5.57962	0.845488	-7.91023	2.56918e-15	2.00438e-13
CCDC102A	18.0314	1.98755	26.0533	3.17877	0.313024	7.9053	2.6728e-15	2.07947e-13
GBP4	3.08631	5.78555	1.73669	-1.31003	0.288601	-7.89711	2.8544e-15	2.21147e-13
INMT	2.27789	5.68701	0.573327	-2.08754	0.606908	-7.89695	2.85817e-15	2.21147e-13
MYOM3	27.9931	79.8246	2.07732	-4.71505	1.10022	-7.89304	2.94925e-15	2.27551e-13
ANKRD13B	36.2626	4.09467	52.3466	3.38833	0.281348	7.8927	2.9571e-15	2.27551e-13
PEBP4	35.2485	103.586	1.07972	-5.65216	1.11952	-7.89088	3.0007e-15	2.30277e-13
E2F5	17.3748	1.30026	25.412	3.52133	0.370476	7.87869	3.30823e-15	2.53187e-13
PPP1R27	43.7247	130.371	0.401364	-6.55068	1.23237	-7.87612	3.37691e-15	2.57249e-13
NTN4	6.43314	14.213	2.54319	-2.10219	0.532194	-7.87603	3.37956e-15	2.57249e-13
CD58	6.52943	12.8002	3.39405	-1.65106	0.379473	-7.87038	3.53576e-15	2.68413e-13
ADAM11	8.56972	0.557989	12.5756	3.12326	0.595648	7.86782	3.6087e-15	2.73213e-13
HECA	5.96372	7.47506	5.20805	-0.449082	0.226912	-7.86547	3.67725e-15	2.77511e-13
QDPR	28.2613	35.7761	24.5039	-0.528049	0.24135	-7.8652	3.68517e-15	2.77511e-13
PLAC9	47.8417	133.708	4.90833	-4.51095	0.756353	-7.85991	3.84414e-15	2.8871e-13
LMCD1	108.34	282.149	21.436	-3.65767	0.631231	-7.85194	4.09647e-15	3.06843e-13
NFU1	45.1736	56.5401	39.4904	-0.506989	0.235563	-7.85013	4.15591e-15	3.10469e-13
MEN1	24.1985	5.1026	33.7464	2.50937	0.192985	7.8462	4.28837e-15	3.19518e-13
ZNF300	13.2082	0.996789	19.3138	3.34671	0.414013	7.8443	4.35384e-15	3.2354e-13
LRRN2	13.5013	0.631147	19.9364	3.68206	0.427534	7.83905	4.5397e-15	3.36463e-13
AFF1	13.7512	31.9255	4.66406	-2.5393	0.357303	-7.8312	4.83251e-15	3.57225e-13
PCYOX1	26.3002	50.4974	14.2016	-1.76028	0.389017	-7.813	5.58429e-15	4.11717e-13
GHITM	73.9581	112.14	54.8674	-1.01803	0.329309	-7.8114	5.65577e-15	4.15899e-13
TMEM159	31.396	76.8888	8.64966	-3.01287	0.596335	-7.80452	5.97303e-15	4.38084e-13
SNTA1	28.3433	67.4439	8.79305	-2.80509	0.580019	-7.80056	6.16311e-15	4.50852e-13
BUB1B	7.10605	0.436173	10.441	2.99391	0.68006	7.79924	6.22818e-15	4.54432e-13
ETFB	88.4172	143.63	60.8107	-1.22644	0.305432	-7.79033	6.68361e-15	4.86401e-13
NAT14	37.6993	2.45274	55.3226	4.0279	0.415675	7.78628	6.90091e-15	5.00921e-13
NFATC4	128.272	8.45868	188.179	4.32197	0.386755	7.77711	7.41978e-15	5.372e-13
ALPK3	18.9807	55.2801	0.830935	-4.94197	1.02317	-7.7616	8.38645e-15	6.05631e-13
DTL	4.81777	0.435003	7.00916	2.4806	0.508423	7.75332	8.95176e-15	6.44801e-13
GOLGA4	21.4549	28.4819	17.9414	-0.638283	0.291862	-7.75222	9.02984e-15	6.48766e-13
TM6SF1	6.94021	11.0506	4.88502	-1.03398	0.566449	-7.75173	9.06493e-15	6.4963e-13
PIK3C2B	6.71525	7.97914	6.08331	-0.342154	0.223415	-7.74006	9.93733e-15	7.10342e-13
NIPSNAP3B	18.203	30.889	11.8601	-1.31016	0.413196	-7.73194	1.05924e-14	7.54736e-13
FAM166B	13.8197	40.2127	0.623146	-4.66623	1.03353	-7.7317	1.0612e-14	7.54736e-13
ANKRD29	2.54766	5.8596	0.891691	-1.85845	0.512291	-7.71866	1.17563e-14	8.34016e-13
SNX32	21.8494	0.206162	32.671	4.80301	0.637973	7.71587	1.20157e-14	8.50278e-13
RAB7B	2.78417	7.29141	0.530547	-2.43757	0.575969	-7.70686	1.28953e-14	9.10235e-13
NCAPG	3.85445	0.215899	5.67372	2.45647	0.502073	7.70348	1.32407e-14	9.30695e-13
ABHD3	9.17665	12.3429	7.59354	-0.634743	0.278175	-7.70338	1.32513e-14	9.30695e-13
SLC2A5	6.60512	17.7457	1.03485	-3.20356	0.74241	-7.70263	1.33293e-14	9.33843e-13
WARS	32.7864	39.0008	29.6792	-0.382768	0.237614	-7.69912	1.37004e-14	9.57464e-13
TCF3	64.3077	10.4266	91.2483	3.01312	0.250136	7.69603	1.40354e-14	9.78451e-13
GDAP1	9.10738	1.69124	12.8155	2.35994	0.294767	7.69336	1.43325e-14	9.96692e-13
SCARF2	28.274	2.94273	40.9396	3.41105	0.358927	7.69017	1.46942e-14	1.01933e-12
SYT7	11.4391	1.43324	16.4421	2.84162	0.310985	7.68011	1.58952e-14	1.09993e-12
CKS2	56.6973	3.37842	83.3567	4.26802	0.449275	7.67945	1.59779e-14	1.10294e-12
ECHDC3	13.3496	24.7855	7.63156	-1.57887	0.349731	-7.67623	1.6384e-14	1.12821e-12
TMBIM1	82.2411	129.063	58.83	-1.12027	0.337094	-7.67325	1.67697e-14	1.15195e-12
PPP6C	19.3965	24.6285	16.7805	-0.527454	0.234345	-7.66683	1.76305e-14	1.20536e-12
CCNA2	7.78477	0.701678	11.3263	2.85671	0.376383	7.66681	1.76327e-14	1.20536e-12
XIRP1	20.6337	61.8338	0.0336897	-5.92567	1.5955	-7.66425	1.79885e-14	1.22671e-12
DUSP13	25.0063	74.8729	0.0730368	-6.14381	1.64154	-7.65823	1.88516e-14	1.28246e-12
TNNC1	1684.02	5030.5	10.7751	-8.73911	1.41762	-7.65377	1.95171e-14	1.32453e-12
RBFOX3	49.3333	0.480552	73.7596	5.65805	0.667051	7.65179	1.98194e-14	1.34181e-12
FEZ2	106.429	263.338	27.9752	-3.18949	0.625301	-7.64782	2.04414e-14	1.3806e-12
GPD1L	18.6679	46.368	4.81777	-3.02537	0.660039	-7.64296	2.12278e-14	1.43028e-12
ASB2	23.2399	68.1193	0.800246	-5.26282	1.17105	-7.64078	2.15909e-14	1.45128e-12
SLC13A3	6.38046	0.638109	9.25164	2.64575	0.382096	7.63682	2.22654e-14	1.49305e-12
HSPB6	369.362	1056.91	25.5879	-5.3143	0.955456	-7.63369	2.28122e-14	1.52608e-12
TWF2	45.0538	87.5565	23.8025	-1.83612	0.474679	-7.63014	2.34495e-14	1.56501e-12
TXNIP	262.296	487.315	149.787	-1.6953	0.404686	-7.62939	2.35871e-14	1.56757e-12
C21orf33	34.6603	47.0855	28.4476	-0.70745	0.323528	-7.62923	2.36154e-14	1.56757e-12
SQSTM1	173.135	256.932	131.237	-0.963862	0.340109	-7.62902	2.36549e-14	1.56757e-12
ZNF135	10.1484	1.3343	14.5554	2.73635	0.296646	7.62132	2.511e-14	1.66009e-12
APOL3	10.0668	25.98	2.11013	-3.11684	0.707997	-7.61485	2.63995e-14	1.74125e-12
OCA2	6.14898	0.105689	9.17063	3.20139	0.662714	7.61348	2.66808e-14	1.75561e-12
ENC1	61.6832	2.76783	91.1409	4.61204	0.516642	7.61319	2.67418e-14	1.75561e-12
CCNB2	11.6211	0.470713	17.1963	3.62905	0.514758	7.61032	2.73424e-14	1.79086e-12
SPIN4	5.4314	0.395446	7.94937	2.68106	0.411097	7.60835	2.77617e-14	1.81411e-12
FAM47E-STBD1	9.22388	25.3875	1.14209	-3.62276	0.795757	-7.60563	2.83529e-14	1.84845e-12
CAVIN4	19.471	57.2679	0.572562	-5.21151	1.10126	-7.6044	2.8623e-14	1.86175e-12
PSMB10	25.8884	30.6532	23.506	-0.369213	0.215685	-7.59848	2.99638e-14	1.94447e-12
DHX34	13.26	2.02841	18.8759	2.71438	0.209144	7.59572	3.06079e-14	1.9813e-12
AGT	3.61383	10.0029	0.419287	-2.95465	0.855603	-7.59545	3.0672e-14	1.9813e-12
RACGAP1	16.0355	2.9948	22.5558	2.55989	0.285875	7.59506	3.07646e-14	1.98273e-12
TJP2	9.63508	17.4519	5.72667	-1.4558	0.435436	-7.59192	3.15204e-14	2.02681e-12
PHKG1	23.4945	58.9251	5.77913	-3.14399	0.734307	-7.59109	3.17232e-14	2.0352e-12
RBM24	29.8388	88.5762	0.470119	-5.92911	1.21077	-7.58344	3.36506e-14	2.15395e-12
TYMS	38.36	2.71089	56.1846	3.94579	0.456748	7.57836	3.4995e-14	2.23492e-12
SLC22A17	48.4136	3.16236	71.0392	4.11331	0.399151	7.57273	3.65463e-14	2.32871e-12
MGST2	20.3315	41.9271	9.53361	-2.02689	0.478017	-7.5687	3.76983e-14	2.3967e-12
PCSK1N	78.6868	0.267433	117.896	6.55165	0.997906	7.56655	3.83272e-14	2.43119e-12
TTN	59.4348	170.154	4.07508	-5.07572	1.12642	-7.56596	3.85015e-14	2.43676e-12
LMX1B	9.55152	0.438059	14.1082	3.39314	0.655228	7.56528	3.87031e-14	2.44402e-12
SMCO1	13.5367	40.1488	0.230572	-5.06345	1.2124	-7.55105	4.31777e-14	2.72049e-12
MBP	16.0781	28.803	9.71561	-1.47574	0.655322	-7.5444	4.54375e-14	2.85015e-12
ENPP4	5.02923	8.45115	3.31826	-1.13004	0.355753	-7.5444	4.54381e-14	2.85015e-12
BRI3	81.3746	97.937	73.0935	-0.417163	0.207548	-7.538	4.77248e-14	2.98693e-12
PLA1A	0.638564	1.68778	0.113956	-1.27072	0.738966	-7.53428	4.91052e-14	3.06652e-12
HRC	27.8679	80.4559	1.57397	-4.98395	1.0263	-7.53361	4.93546e-14	3.07169e-12
COL2A1	59.7027	1.20848	88.9497	5.34799	0.768279	7.53348	4.94061e-14	3.07169e-12
CRHR1	21.0046	0.351058	31.3314	4.58078	0.771114	7.53273	4.96911e-14	3.0826e-12
PHC1	55.2628	6.89521	79.4466	3.34898	0.2851	7.52473	5.28305e-14	3.27015e-12
KTN1	80.1222	121.285	59.5409	-1.01426	0.372697	-7.52142	5.41851e-14	3.34664e-12
PPP1R14A	14.8941	37.3118	3.68531	-3.03157	0.655517	-7.52034	5.46339e-14	3.36698e-12
ANKH	16.8144	31.1426	9.65033	-1.59359	0.426569	-7.51187	5.82885e-14	3.58436e-12
MYO18B	12.991	38.7912	0.0909008	-5.18886	1.47255	-7.51023	5.90254e-14	3.62177e-12
KCNAB3	12.2877	0.357707	18.2528	3.82582	0.554599	7.50098	6.33433e-14	3.87826e-12
STMN1	210.492	25.7816	302.847	3.50403	0.337264	7.49791	6.4843e-14	3.96147e-12
C1orf115	6.35555	14.8194	2.12365	-2.34038	0.490006	-7.49372	6.6949e-14	4.08128e-12
PINK1	63.8749	132.965	29.3299	-2.14305	0.51599	-7.49051	6.86067e-14	4.16759e-12
CCNB1	21.8661	1.49948	32.0494	3.72493	0.42742	7.49041	6.86607e-14	4.16759e-12
MRPL41	35.7714	60.3468	23.4836	-1.32517	0.39565	-7.48835	6.97431e-14	4.22418e-12
CLCN1	4.09801	12.233	0.0305183	-3.6827	1.34661	-7.48387	7.21652e-14	4.36151e-12
NNMT	46.7042	133.017	3.54764	-4.88116	0.897068	-7.48357	7.23281e-14	4.36199e-12
SPAG5	13.6543	1.06889	19.947	3.33981	0.41718	7.4825	7.2922e-14	4.38841e-12
PYGM	387.89	1150.91	6.38107	-7.28598	1.30191	-7.47916	7.48e-14	4.49183e-12
ETFDH	37.7	54.5916	29.2541	-0.877733	0.379846	-7.4782	7.53479e-14	4.5151e-12
FAR2P2	24.4245	0.885397	36.1941	4.30213	0.637046	7.47342	7.81372e-14	4.67231e-12
KIF2C	10.9149	0.497209	16.1238	3.51565	0.47323	7.46984	8.02947e-14	4.79078e-12
HAGH	45.0916	73.3598	30.9575	-1.21837	0.358301	-7.46957	8.04588e-14	4.79078e-12
CPNE1	153.01	39.0069	210.011	2.399	0.127452	7.46358	8.42051e-14	5.00328e-12
PGM1	78.7956	177.154	29.6164	-2.54075	0.546237	-7.46239	8.4965e-14	5.0378e-12
AMPD2	45.3983	6.89484	64.65	3.05581	0.299486	7.45734	8.82899e-14	5.21958e-12
ESPN	57.0875	0.891785	85.1853	5.50962	0.760551	7.45717	8.84016e-14	5.21958e-12
CRADD	5.8497	7.45908	5.04501	-0.484755	0.261923	-7.45585	8.92896e-14	5.26099e-12
NEB	474.135	1408.69	6.855	-7.48756	1.36416	-7.4529	9.13098e-14	5.36879e-12
PPARA	11.5723	19.5137	7.60161	-1.25391	0.527136	-7.44593	9.62658e-14	5.6484e-12
RRAD	22.3435	62.836	2.09729	-4.36529	0.949116	-7.43701	1.02991e-13	6.03044e-12
FILIP1L	38.8101	99.657	8.38668	-3.42269	0.539103	-7.42977	1.08783e-13	6.35634e-12
RIPK4	7.52604	0.0954373	11.2413	3.48218	0.79562	7.42663	1.11403e-13	6.49599e-12
HSPA7	1.67239	4.47373	0.271719	-2.10574	0.696305	-7.42531	1.12516e-13	6.5423e-12
POMP	53.4449	61.8005	49.2671	-0.321162	0.232797	-7.42514	1.12662e-13	6.5423e-12
SETD7	17.111	30.5631	10.385	-1.47111	0.394239	-7.42414	1.13514e-13	6.57822e-12
MRC2	144.236	16.9435	207.882	3.54116	0.239592	7.42206	1.15311e-13	6.66861e-12
CISD3	14.3167	23.5753	9.6874	-1.2013	0.363071	-7.41861	1.18357e-13	6.83077e-12
SHE	3.20576	7.32801	1.14463	-1.95724	0.501641	-7.41545	1.21212e-13	6.9812e-12
KAT2B	8.01785	17.1507	3.4514	-2.0277	0.577195	-7.41314	1.23344e-13	7.08949e-12
CPNE7	29.112	0.150211	43.5929	5.27684	0.904696	7.40893	1.27325e-13	7.30342e-12
NLGN2	39.4878	5.67354	56.3949	3.1044	0.315779	7.40773	1.28479e-13	7.35465e-12
ARMC9	8.28143	0.850122	11.9971	2.81249	0.313381	7.40603	1.30141e-13	7.43467e-12
RAD23B	59.0671	64.6925	56.2543	-0.198344	0.220621	-7.40328	1.32859e-13	7.57457e-12
NEXN	87.039	236.09	12.5134	-4.13297	0.860281	-7.40089	1.3527e-13	7.69644e-12
MYPN	17.3272	51.6439	0.168893	-5.49305	1.43248	-7.39846	1.37778e-13	7.82333e-12
PCYT1A	24.187	30.4477	21.0566	-0.511745	0.229403	-7.39621	1.40131e-13	7.9201e-12
PLA2G2A	65.7402	197.095	0.0627785	-7.54221	1.70625	-7.39605	1.40294e-13	7.9201e-12
MYH7	946.103	2836.56	0.876041	-10.5627	1.78982	-7.39581	1.40547e-13	7.9201e-12
RIC3	30.0002	3.0126	43.4939	3.471	0.324786	7.39576	1.40607e-13	7.9201e-12
LRRFIP1	37.8256	53.9988	29.7389	-0.839333	0.340178	-7.38947	1.47412e-13	8.28682e-12
BCL6	47.1852	80.5819	30.4869	-1.3735	0.382269	-7.38334	1.54366e-13	8.66051e-12
SMPDL3A	5.81589	13.5679	1.93986	-2.30898	0.636286	-7.37079	1.69617e-13	9.49722e-12
HSPB1	333.974	740.347	130.787	-2.49194	0.602956	-7.36875	1.72233e-13	9.62455e-12
KCNIP1	33.3188	0.586203	49.6851	4.99791	0.816059	7.36738	1.74011e-13	9.70467e-12
LIG1	19.4583	4.73546	26.8198	2.27813	0.240423	7.36324	1.79501e-13	9.99106e-12
PSIP1	88.96	24.7076	121.086	2.24764	0.137316	7.35573	1.89889e-13	1.05484e-11
ALDH4A1	14.3648	28.3001	7.39717	-1.80293	0.469328	-7.35519	1.9066e-13	1.05704e-11
FABP3	221.435	613.444	25.4302	-4.53902	0.91296	-7.35165	1.95773e-13	1.08325e-11
TSPYL4	19.9338	3.9313	27.935	2.55278	0.215102	7.34903	1.99648e-13	1.10252e-11
MPC1	51.6285	103.116	25.8847	-1.95334	0.485824	-7.34037	2.12997e-13	1.17395e-11
ZNF562	9.69276	2.69859	13.1898	1.93981	0.180482	7.33639	2.19436e-13	1.20707e-11
NFE2L1	165.543	327.531	84.5483	-1.94122	0.511202	-7.33443	2.22667e-13	1.22246e-11
ZNF785	14.0257	3.61369	19.2317	2.13262	0.206182	7.33331	2.24532e-13	1.23029e-11
EFHD1	7.34839	15.6899	3.17764	-1.99821	0.600531	-7.32831	2.33065e-13	1.27457e-11
GPX7	40.7316	4.83758	58.6786	3.35377	0.348866	7.32196	2.44367e-13	1.33379e-11
CXCL2	4.31623	11.1528	0.897926	-2.6788	0.671652	-7.31719	2.53211e-13	1.37939e-11
ANKRD40	23.2109	35.8558	16.8884	-1.04287	0.336118	-7.30994	2.67257e-13	1.45309e-11
FAM169A	4.00415	0.104736	5.95386	2.65411	0.661159	7.30889	2.69356e-13	1.46169e-11
FAM19A2	16.5794	2.03088	23.8536	3.03565	0.66315	7.30782	2.71507e-13	1.47052e-11
ATP1B1	28.4428	72.5064	6.41094	-3.31014	0.709975	-7.30329	2.80824e-13	1.51806e-11
MME	12.4411	34.7502	1.28663	-3.96666	0.924221	-7.29379	3.01364e-13	1.62353e-11
POPDC3	17.1825	50.9104	0.318547	-5.299	1.3112	-7.29373	3.01487e-13	1.62353e-11
VEGFB	102.177	171.045	67.7424	-1.32351	0.323018	-7.29069	3.08381e-13	1.65701e-11
ATXN2L	85.6006	21.8799	117.461	2.37226	0.157087	7.29047	3.0888e-13	1.65701e-11
KIF18B	6.0019	0.129705	8.938	3.13701	0.620167	7.29014	3.09629e-13	1.65787e-11
RRAS2	22.499	26.451	20.523	-0.350981	0.216384	-7.2877	3.1528e-13	1.68492e-11
PALMD	40.0233	107.708	6.18088	-3.92016	0.732275	-7.28265	3.27327e-13	1.74599e-11
MBNL1	42.4812	68.6303	29.4066	-1.19533	0.35141	-7.28166	3.29742e-13	1.75555e-11
PLCD3	22.9316	49.1193	9.83779	-2.2093	0.579158	-7.27854	3.37453e-13	1.79321e-11
VAMP5	37.2865	96.3873	7.73603	-3.47868	0.731639	-7.27748	3.40112e-13	1.80394e-11
ETV1	8.11009	0.721047	11.8046	2.89531	0.379924	7.27336	3.5065e-13	1.85634e-11
SNN	11.4692	22.3672	6.02018	-1.73491	0.405417	-7.27122	3.56242e-13	1.8824e-11
COL23A1	76.4324	1.12961	114.084	5.75595	0.756302	7.26705	3.67421e-13	1.93783e-11
MMP16	3.9011	0.222041	5.74063	2.46359	0.541415	7.26616	3.69852e-13	1.94701e-11
CHRNA1	2.77825	6.81096	0.761888	-2.14838	0.737107	-7.25985	3.87515e-13	2.03619e-11
PARVB	28.3455	69.58	7.72819	-3.0155	0.63877	-7.25888	3.90306e-13	2.04704e-11
CNTNAP1	32.0971	3.0936	46.5988	3.53948	0.393502	7.25709	3.95517e-13	2.07051e-11
CBS	22.5224	0.805437	33.3809	4.25119	0.523256	7.25532	4.00726e-13	2.09389e-11
KCNH3	4.61152	0.112482	6.86104	2.82094	0.711471	7.255	4.01654e-13	2.09485e-11
MYOZ2	37.2945	111.576	0.153548	-6.60868	1.54121	-7.25415	4.04198e-13	2.10422e-11
DLD	61.5228	101.216	41.676	-1.26013	0.346529	-7.25196	4.1079e-13	2.13459e-11
CRY2	22.1568	38.6484	13.911	-1.41088	0.410698	-7.24983	4.17289e-13	2.16437e-11
DIRAS3	28.6812	0.583257	42.7302	4.78766	0.652476	7.24759	4.24259e-13	2.19647e-11
SURF1	25.9852	28.2808	24.8374	-0.180497	0.230413	-7.24637	4.28097e-13	2.21228e-11
KANK3	4.68148	8.55066	2.74688	-1.34991	0.469739	-7.24514	4.31999e-13	2.22836e-11
CAV1	96.6278	234.681	27.6011	-3.0427	0.677456	-7.24257	4.40273e-13	2.26688e-11
EPOP	7.16997	0.209088	10.6504	3.26839	0.664855	7.23812	4.54956e-13	2.33821e-11
CACNG1	15.061	44.8182	0.182359	-5.27618	1.35059	-7.2369	4.59067e-13	2.35504e-11
MYOM2	41.9591	117.744	4.06682	-4.55063	1.22152	-7.22446	5.03104e-13	2.57626e-11
P3H1	45.5641	8.33123	64.1805	2.8043	0.238505	7.22159	5.13849e-13	2.62651e-11
SIX3	16.9751	0.434009	25.2457	4.19396	0.666879	7.22115	5.15501e-13	2.63018e-11
COL26A1	9.11888	0	13.6783	3.87561	1.29107	7.21819	5.2684e-13	2.68317e-11
FZD2	19.3316	0.491086	28.7519	4.31854	0.646406	7.21451	5.41303e-13	2.75017e-11
COX17	32.3416	61.7341	17.6454	-1.75043	0.487818	-7.21434	5.41948e-13	2.75017e-11
RTKN	55.8221	5.54646	80.9599	3.64613	0.284088	7.2123	5.50151e-13	2.78677e-11
MPP1	16.3834	19.8249	14.6627	-0.410975	0.231402	-7.20933	5.62272e-13	2.84305e-11
PSRC1	11.0404	0.458132	16.3316	3.57121	0.47353	7.20429	5.83479e-13	2.945e-11
FOXM1	11.4865	0.755868	16.8519	3.34582	0.482885	7.19849	6.08832e-13	3.06747e-11
DMKN	127.665	2.66209	190.166	5.70601	0.723581	7.19624	6.18957e-13	3.1122e-11
GRIK5	18.5204	0.367564	27.5968	4.38617	0.631568	7.19603	6.1992e-13	3.1122e-11
NRXN2	18.4061	1.52965	26.8442	3.46037	0.398508	7.19019	6.47023e-13	3.24248e-11
HJURP	5.80437	0.615847	8.39863	2.54016	0.504615	7.18988	6.48463e-13	3.24393e-11
ACTN2	323.348	961.79	4.12679	-7.55302	1.50399	-7.18656	6.64428e-13	3.3179e-11
EPHA4	44.2589	3.89589	64.4403	3.74054	0.40118	7.18434	6.75305e-13	3.36625e-11
ZNF681	1.79474	0.120782	2.63172	1.69615	0.409627	7.18069	6.93628e-13	3.45147e-11
ART3	19.2031	56.398	0.605645	-5.15978	1.09994	-7.17983	6.97988e-13	3.46704e-11
CAT	81.2982	156.251	43.8216	-1.81081	0.41906	-7.17829	7.05872e-13	3.50003e-11
CMYA5	155.602	457.321	4.74322	-6.31835	1.16916	-7.1764	7.15731e-13	3.54268e-11
SYNDIG1	11.71	0.136675	17.4966	4.02437	0.835188	7.17364	7.30287e-13	3.60839e-11
MTIF3	60.5596	70.905	55.3869	-0.350733	0.241967	-7.17192	7.39553e-13	3.64777e-11
KIF20A	7.61132	0.848147	10.9929	2.69803	0.542819	7.16921	7.54312e-13	3.71406e-11
SYNPO	116.879	281.837	34.3997	-2.99816	0.626772	-7.16436	7.81494e-13	3.84119e-11
COL9A3	141.944	1.96606	211.933	6.16571	0.772635	7.163	7.89296e-13	3.87278e-11
SYNGAP1	150.769	6.9298	222.688	4.81806	0.454395	7.16139	7.98657e-13	3.91189e-11
C8orf37	5.51048	0.737008	7.89722	2.35675	0.303211	7.15632	8.28728e-13	4.05213e-11
PSMA7	132.634	166.599	115.652	-0.522809	0.270103	-7.15599	8.30711e-13	4.05479e-11
TLE1	117.824	18.0298	167.72	3.1483	0.312344	7.1527	8.50853e-13	4.14592e-11
HIPK3	19.4374	29.3111	14.5005	-0.967534	0.330673	-7.14896	8.74402e-13	4.25331e-11
CLIP1	26.4275	44.3064	17.4881	-1.29312	0.451632	-7.14301	9.13076e-13	4.43377e-11
KLHL31	11.4985	28.0892	3.20318	-2.79093	0.675857	-7.1406	9.29244e-13	4.50451e-11
MPC2	48.8997	67.3671	39.666	-0.74948	0.373996	-7.1358	9.62248e-13	4.65649e-11
TRIP10	59.0719	91.434	42.8909	-1.0745	0.415811	-7.13195	9.89594e-13	4.78061e-11
XRCC1	28.812	7.09415	39.6709	2.32905	0.154642	7.12538	1.03792e-12	5.00546e-11
C6orf106	28.1184	47.503	18.4261	-1.32008	0.388428	-7.12304	1.05573e-12	5.08266e-11
CHURC1	34.0806	33.4131	34.4143	0.0413776	0.225475	-7.11927	1.08502e-12	5.21478e-11
FLOT1	49.6521	48.7825	50.0869	0.0373128	0.210628	-7.10811	1.17646e-12	5.64461e-11
DUSP27	7.58988	22.5839	0.0928812	-4.43159	1.53364	-7.09911	1.25566e-12	6.01435e-11
SYPL2	13.2772	38.3464	0.742555	-4.49696	1.07	-7.09462	1.29707e-12	6.20218e-11
DLGAP5	4.5992	0.11692	6.84034	2.81139	0.712885	7.09215	1.3204e-12	6.30299e-11
MLYCD	2.86986	4.99142	1.80909	-1.0928	0.441408	-7.09158	1.32586e-12	6.31834e-11
PLIN5	31.6626	79.2322	7.87782	-3.17591	0.70081	-7.08387	1.40181e-12	6.66901e-11
AJAP1	10.7324	0.168062	16.0146	3.86459	0.71738	7.08088	1.43246e-12	6.80334e-11
LACTB	11.4212	16.5092	8.87726	-0.825929	0.295019	-7.07717	1.47127e-12	6.9759e-11
CNOT6	12.639	2.54626	17.6853	2.39754	0.21721	7.07518	1.49257e-12	7.06498e-11
SUZ12P1	40.4251	6.19636	57.5395	3.02407	0.29413	7.07242	1.52254e-12	7.19479e-11
ANK1	41.7054	121.934	1.59136	-5.56803	0.990655	-7.06904	1.56006e-12	7.35973e-11
RPS6KA3	9.5941	14.3039	7.23918	-0.893332	0.331316	-7.06326	1.62643e-12	7.65998e-11
KCNK1	6.39476	0.391209	9.39654	2.90169	0.443607	7.06216	1.63938e-12	7.7081e-11
BAG1	47.2138	74.4209	33.6102	-1.12377	0.344823	-7.06141	1.64822e-12	7.73673e-11
CDCA7	10.1948	0.834963	14.8747	3.1129	0.389335	7.06117	1.65103e-12	7.73706e-11
ARHGAP39	6.92551	0.564161	10.1062	2.8279	0.422812	7.05133	1.77211e-12	8.28676e-11
ZNF607	5.01427	1.18563	6.92859	1.85901	0.210059	7.05117	1.77422e-12	8.28676e-11
NR2F1	301.649	1.43159	451.758	7.5407	1.01143	7.04911	1.80062e-12	8.39613e-11
TSLP	0.327608	0.973176	0.00482433	-0.973576	1.1096	-7.0418	1.89771e-12	8.83423e-11
MKI67	4.7974	0.350465	7.02086	2.5703	0.640858	7.04092	1.90978e-12	8.87576e-11
C10orf71	27.4042	81.5737	0.319404	-5.96773	1.46449	-7.04046	1.91611e-12	8.89052e-11
ACKR1	9.85828	29.4688	0.0530307	-4.85471	1.49894	-7.03883	1.93858e-12	8.97997e-11
HSPB3	23.428	70.0762	0.103834	-6.00877	1.57034	-7.03687	1.96612e-12	9.07866e-11
ADGRB2	34.9012	1.89369	51.4049	4.17872	0.592966	7.03685	1.96633e-12	9.07866e-11
MPP7	1.62331	3.27094	0.799493	-1.24696	0.526489	-7.03374	2.01073e-12	9.26847e-11
SOD1	178.376	190.667	172.231	-0.145907	0.204957	-7.0332	2.01847e-12	9.28891e-11
ZWINT	15.3732	1.24104	22.4393	3.38669	0.561337	7.02444	2.1492e-12	9.8744e-11
NDC80	8.18221	0.664005	11.9413	2.95925	0.445232	7.02335	2.16605e-12	9.93563e-11
SLC2A4	22.4979	53.9279	6.78288	-2.81916	0.688596	-7.01834	2.24523e-12	1.02782e-10
ANKRD23	92.2274	259.061	8.81048	-4.72839	1.11049	-7.01816	2.24804e-12	1.02782e-10
KIAA0930	21.3485	36.607	13.7193	-1.35329	0.349691	-7.01579	2.28653e-12	1.04372e-10
TMEM120A	40.4438	61.1443	30.0936	-0.999006	0.449352	-7.0123	2.34435e-12	1.06839e-10
SLC40A1	17.0542	43.6067	3.77801	-3.22278	0.736554	-7.01119	2.36307e-12	1.07518e-10
C1QTNF9	0.799754	1.7472	0.32603	-1.05085	0.577835	-7.01074	2.37069e-12	1.07691e-10
SOX17	2.40837	4.66116	1.28197	-1.31081	0.438693	-7.0081	2.41584e-12	1.09565e-10
MRO	0.725196	1.09759	0.538998	-0.446744	0.390003	-7.00784	2.42026e-12	1.09589e-10
KLF15	7.5123	15.3952	3.57086	-1.84273	0.494405	-7.00613	2.44992e-12	1.10754e-10
CCDC138	5.51412	0.645241	7.94857	2.44336	0.370221	7.00531	2.46443e-12	1.11231e-10
F10	4.02131	10.6213	0.721327	-2.75517	0.740716	-7.005	2.46986e-12	1.11298e-10
ACYP2	29.0915	66.9443	10.1651	-2.60536	0.635752	-7.00405	2.48675e-12	1.1188e-10
SCML2	5.54511	0.57056	8.03239	2.52383	0.425704	7.00352	2.49608e-12	1.12121e-10
RPL3L	37.8569	109.331	2.11988	-5.1442	1.0728	-6.99206	2.70887e-12	1.21485e-10
CNTROB	36.3472	6.3334	51.3541	2.83575	0.203534	6.99102	2.72897e-12	1.22192e-10
CITED2	26.0198	44.964	16.5476	-1.38923	0.416399	-6.98853	2.77782e-12	1.24182e-10
FOXD1	34.8755	1.20049	51.713	4.58226	0.693736	6.98299	2.88962e-12	1.28975e-10
SYNC	9.44171	21.4511	3.43702	-2.33912	0.755259	-6.98165	2.91736e-12	1.30007e-10
CRIM1	23.1961	43.4116	13.0883	-1.65644	0.43492	-6.97861	2.98116e-12	1.3264e-10
TRIM8	49.1213	74.074	36.6449	-0.995858	0.284767	-6.97597	3.03777e-12	1.34946e-10
GYG1	53.2111	127.031	16.3014	-2.88753	0.705685	-6.97544	3.04917e-12	1.35239e-10
RAD9A	27.1649	5.00237	38.2462	2.70895	0.218077	6.97363	3.08865e-12	1.36775e-10
SPDL1	13.3152	2.21709	18.8642	2.62635	0.301644	6.97142	3.13762e-12	1.38725e-10
ATP6V1E1	65.7698	69.0231	64.1431	-0.104219	0.215671	-6.97028	3.16301e-12	1.39628e-10
CBX7	16.7011	25.0322	12.5355	-0.943548	0.399374	-6.96839	3.20583e-12	1.41297e-10
HDAC9	2.91829	6.16402	1.29542	-1.64201	0.46761	-6.96648	3.2497e-12	1.43007e-10
FAM227A	2.28111	0.426332	3.20851	1.561	0.409637	6.96105	3.37753e-12	1.48401e-10
MAP7D2	4.08754	0.123659	6.06948	2.6534	0.627224	6.96037	3.39382e-12	1.48884e-10
IFI27	59.2637	142.81	17.4903	-2.95933	0.533604	-6.95812	3.44854e-12	1.50921e-10
TPM3	641.282	1671.48	126.184	-3.717	0.763099	-6.95802	3.45098e-12	1.50921e-10
CDC20	13.0512	0.600305	19.2767	3.6634	0.75469	6.95741	3.46588e-12	1.51338e-10
DRAXIN	2.68178	0.0958773	3.97472	2.18253	0.561295	6.9557	3.50814e-12	1.52946e-10
PCDHB14	21.9517	1.04401	32.4056	4.03061	0.503984	6.95418	3.54608e-12	1.54362e-10
TTK	3.68101	0.555007	5.24401	2.00555	0.543632	6.94723	3.72535e-12	1.61915e-10
LYPD1	31.5791	0.355228	47.1911	5.15216	0.841865	6.9449	3.7873e-12	1.64354e-10
CCNE2	6.64571	1.03221	9.45247	2.36272	0.402932	6.94146	3.8807e-12	1.68148e-10
OSGIN2	10.3745	15.997	7.5632	-0.989053	0.318327	-6.93815	3.97269e-12	1.71869e-10
ENO3	570.211	1626.62	42.0083	-5.242	1.12479	-6.92836	4.25742e-12	1.83905e-10
ALDH9A1	43.5186	52.5214	39.0172	-0.419495	0.246862	-6.92211	4.44952e-12	1.91908e-10
MARCO	3.66659	10.7828	0.108463	-3.41005	1.07544	-6.91938	4.53632e-12	1.95353e-10
IDI2	18.334	54.7182	0.141829	-5.60873	1.48278	-6.91688	4.61691e-12	1.9852e-10
CCDC181	6.3225	0.186582	9.39046	3.13038	0.648114	6.90828	4.90561e-12	2.10612e-10
PRKAG3	4.44771	13.2026	0.0702458	-3.73015	1.36586	-6.90493	5.02299e-12	2.15323e-10
BUB1	4.28676	0.139887	6.3602	2.69085	0.575031	6.90356	5.07139e-12	2.17068e-10
GPSM1	21.0148	2.23979	30.4023	3.2769	0.362025	6.9025	5.10936e-12	2.18361e-10
CTNNAL1	12.2254	13.8552	11.4105	-0.259405	0.275601	-6.90146	5.14704e-12	2.19638e-10
C19orf48	46.4286	5.43787	66.9239	3.39927	0.387712	6.89644	5.3321e-12	2.27191e-10
DISP3	5.8768	0.00822067	8.81109	3.2826	1.19264	6.89579	5.35656e-12	2.27888e-10
C1orf21	19.6152	35.7159	11.5649	-1.547	0.531217	-6.89347	5.4446e-12	2.31284e-10
LRRC39	37.5587	106.89	2.8932	-4.79246	0.982456	-6.89185	5.50714e-12	2.33589e-10
BAG3	37.9524	79.4329	17.2122	-2.14289	0.558779	-6.88907	5.61576e-12	2.37838e-10
CAMK2A	7.27873	20.9367	0.449758	-3.91946	1.09467	-6.88855	5.63645e-12	2.38356e-10
ZNF185	15.6374	1.79421	22.559	3.07577	0.375785	6.88631	5.72583e-12	2.41772e-10
DPEP2	1.66384	4.24086	0.375327	-1.93003	0.713744	-6.88439	5.80376e-12	2.44696e-10
RBPMS	24.8728	54.6265	9.99589	-2.33881	0.600848	-6.88296	5.86201e-12	2.46783e-10
LNPK	9.84436	13.0552	8.23894	-0.605307	0.275978	-6.88227	5.89052e-12	2.47613e-10
ABI2	32.0894	6.54958	44.8593	2.60275	0.242639	6.87734	6.09797e-12	2.55648e-10
IMPA2	28.3117	56.2974	14.3188	-1.90317	0.59141	-6.8773	6.09982e-12	2.55648e-10
C17orf100	5.09056	0.416475	7.4276	2.57282	0.42936	6.87281	6.29508e-12	2.63439e-10
IGSF21	18.9812	0.878075	28.0328	3.95036	0.545363	6.86941	6.44688e-12	2.69392e-10
TGM2	7.02113	13.0606	4.00142	-1.49125	0.582992	-6.86758	6.53008e-12	2.72464e-10
SUN2	49.073	52.5198	47.3496	-0.146568	0.275347	-6.8671	6.55206e-12	2.72977e-10
SMYD1	24.7219	73.7789	0.193418	-5.96946	1.68167	-6.86288	6.74843e-12	2.80743e-10
CFAP61	2.32537	5.42124	0.77743	-1.85306	0.920576	-6.85528	7.11711e-12	2.95643e-10
RALGAPA2	5.21325	8.91324	3.36325	-1.18395	0.412124	-6.85309	7.22694e-12	2.99764e-10
B3GAT1	9.69976	0.124773	14.4872	3.78338	0.771771	6.85276	7.24374e-12	3.00019e-10
FIBCD1	30.67	0.239922	45.885	5.24081	0.983433	6.85141	7.31262e-12	3.02427e-10
PAQR7	11.7758	2.00109	16.6632	2.55719	0.286842	6.84715	7.5338e-12	3.11117e-10
U2AF2	147.355	34.6879	203.688	2.51992	0.152374	6.8458	7.60498e-12	3.13597e-10
DDI2	5.61928	6.78083	5.0385	-0.365732	0.285232	-6.84151	7.836e-12	3.22651e-10
UGP2	133.969	254.575	73.6656	-1.77523	0.472919	-6.83994	7.92242e-12	3.25733e-10
SMTNL2	19.5436	57.8194	0.405611	-5.38702	1.25368	-6.83687	8.09396e-12	3.32301e-10
SCN1B	31.2648	82.461	5.66669	-3.64606	0.762593	-6.83572	8.15955e-12	3.34506e-10
MSRB2	20.6212	27.4255	17.219	-0.641743	0.329301	-6.83521	8.18858e-12	3.35208e-10
MYOM2	59.1708	171.601	2.95565	-5.44738	1.54968	-6.8303	8.47344e-12	3.46366e-10
YWHAG	92.5229	122.816	77.3762	-0.659715	0.283705	-6.828	8.61076e-12	3.51469e-10
SYNE2	32.6161	57.9043	19.972	-1.48991	0.474037	-6.82753	8.63912e-12	3.52116e-10
ARMC4	5.84257	0.218298	8.6547	2.98636	0.737853	6.82668	8.69012e-12	3.53683e-10
PLEKHG2	50.3203	6.79869	72.0811	3.22819	0.261751	6.82558	8.75711e-12	3.55895e-10
BRIP1	3.91185	0.282339	5.7266	2.3911	0.575335	6.82327	8.8994e-12	3.61157e-10
FHL5	1.84058	4.93777	0.291987	-2.20033	0.945434	-6.82272	8.93321e-12	3.62007e-10
TMED5	15.3397	25.0004	10.5093	-1.17573	0.367789	-6.82197	8.98007e-12	3.63383e-10
GPT	18.1755	36.4929	9.01675	-1.9042	0.520869	-6.8149	9.43308e-12	3.81167e-10
CRABP1	98.3549	0.830483	147.117	6.33837	0.997466	6.81358	9.52001e-12	3.84128e-10
CYB5R1	74.9967	178.283	23.3534	-2.88004	0.725711	-6.80678	9.98063e-12	4.02138e-10
ZFPM2	5.28925	5.56679	5.15048	-0.0944894	0.394637	-6.80168	1.03403e-11	4.16034e-10
EIF2B3	20.9415	26.1094	18.3575	-0.485895	0.287582	-6.80081	1.04036e-11	4.17984e-10
DLG3	10.777	2.14456	15.0932	2.35552	0.252589	6.79926	1.05155e-11	4.21878e-10
NDUFC2	161.208	219.318	132.154	-0.726494	0.296678	-6.79664	1.0709e-11	4.29029e-10
SLC6A9	10.3253	1.31739	14.8293	2.77203	0.407369	6.79464	1.08581e-11	4.34387e-10
SPTB	9.98262	26.6178	1.66505	-3.37336	1.1838	-6.79436	1.08795e-11	4.34626e-10
KLHL30	4.13279	11.6787	0.359826	-3.22091	0.982751	-6.79236	1.10311e-11	4.40056e-10
NKD2	67.8852	0.979444	101.338	5.69211	0.835859	6.79175	1.10783e-11	4.41316e-10
IDUA	48.678	5.22415	70.405	3.52008	0.336878	6.78897	1.12939e-11	4.49268e-10
FCGR2B	2.57337	7.27727	0.221419	-2.7606	0.765556	-6.78679	1.14654e-11	4.54954e-10
INHBA	52.9211	1.31095	78.7262	5.1085	0.707285	6.78675	1.14692e-11	4.54954e-10
SULT4A1	7.86375	0	11.7956	3.67758	1.27809	6.78507	1.16031e-11	4.59618e-10
PLEKHG4B	4.94446	0.0472493	7.39306	3.00259	0.83492	6.78454	1.16459e-11	4.60401e-10
TCTEX1D2	30.8746	3.6522	44.4858	3.28943	0.318768	6.78442	1.16555e-11	4.60401e-10
ATP5PF	187.847	296.753	133.394	-1.14765	0.385656	-6.78187	1.18628e-11	4.67932e-10
APOBEC2	104.128	309.681	1.35197	-7.04542	1.3959	-6.7765	1.23121e-11	4.84388e-10
MAP2K1	26.034	30.1213	23.9903	-0.316537	0.230821	-6.77647	1.23144e-11	4.84388e-10
ZFP37	4.55827	0.632738	6.52104	2.20364	0.319003	6.77144	1.27507e-11	5.00853e-10
NPM3	46.4911	9.26649	65.1034	2.68678	0.256907	6.76897	1.29699e-11	5.08752e-10
GUCD1	35.4901	46.7583	29.8561	-0.630196	0.322313	-6.76712	1.3137e-11	5.1459e-10
SVIL	85.5897	192.551	32.109	-2.54742	0.80586	-6.7651	1.33217e-11	5.21099e-10
GHR	16.8912	37.9771	6.34819	-2.40717	0.579468	-6.76438	1.33884e-11	5.22984e-10
MAP1LC3B	40.0634	53.9463	33.1219	-0.687325	0.331354	-6.76277	1.35375e-11	5.28073e-10
NINJ2	15.4239	23.2386	11.5165	-0.953479	0.448529	-6.76063	1.37395e-11	5.35214e-10
CAPN3	65.157	170.163	12.6541	-3.64797	0.959956	-6.75842	1.39501e-11	5.42288e-10
COX5B	208.815	361.133	132.656	-1.438	0.459257	-6.75832	1.39596e-11	5.42288e-10
ECH1	215.713	379.388	133.875	-1.49585	0.471296	-6.75382	1.44e-11	5.58625e-10
NDUFB10	156.099	303.786	82.2561	-1.87217	0.522653	-6.75289	1.44925e-11	5.61441e-10
TONSL	5.67183	0.454551	8.28046	2.67362	0.42502	6.75041	1.47431e-11	5.70363e-10
GLT8D2	100.045	9.20835	145.463	3.84271	0.418775	6.74617	1.51795e-11	5.86442e-10
ANLN	6.75129	0.375047	9.93941	2.99198	0.532215	6.74503	1.52995e-11	5.90267e-10
SEMA4G	12.0386	1.97098	17.0724	2.60478	0.348566	6.74462	1.53424e-11	5.91113e-10
STRADB	24.6135	42.8528	15.4938	-1.41074	0.496289	-6.74289	1.55271e-11	5.97412e-10
WWP1	27.7092	40.3027	21.4124	-0.881936	0.436165	-6.74103	1.57265e-11	6.04257e-10
INPP5K	23.1579	26.191	21.6413	-0.264172	0.276364	-6.73921	1.59251e-11	6.11056e-10
ASNS	34.565	4.57017	49.5624	3.18227	0.294156	6.73825	1.60309e-11	6.14276e-10
MYOZ1	250.93	733.393	9.69793	-6.10115	1.18628	-6.735	1.63932e-11	6.27306e-10
C10orf128	5.28475	15.199	0.327632	-3.60898	0.94542	-6.7294	1.70364e-11	6.51034e-10
FANCD2	7.95055	0.983854	11.4339	2.6479	0.324785	6.72853	1.7139e-11	6.54069e-10
SYT13	1.78227	0.0585067	2.64414	1.78355	0.618262	6.72754	1.72553e-11	6.57617e-10
HMOX1	8.27759	17.6334	3.59969	-2.01828	0.537179	-6.72565	1.74809e-11	6.65313e-10
WIF1	443.273	4.20539	662.807	6.99461	1.00144	6.72354	1.77357e-11	6.73394e-10
PNMA6A	10.6394	0.857865	15.5302	3.15339	0.494674	6.7235	1.7741e-11	6.73394e-10
MPPED1	5.58667	0.0316837	8.36417	3.18215	1.01521	6.7188	1.83222e-11	6.94519e-10
RAD54B	8.05016	0.814597	11.6679	2.80346	0.409549	6.71753	1.84835e-11	6.9969e-10
ATP1B4	4.01269	11.8607	0.0886802	-3.56232	1.31838	-6.71303	1.90626e-11	7.20642e-10
ANGPTL2	36.0031	73.4396	17.2848	-2.02543	0.459744	-6.70865	1.9644e-11	7.41626e-10
RNF141	11.2201	19.9838	6.83821	-1.42068	0.42554	-6.70766	1.97773e-11	7.4566e-10
BVES	3.2771	8.37661	0.72734	-2.44051	0.776848	-6.70563	2.00544e-11	7.55097e-10
KIF1C	61.4179	110.345	36.9545	-1.55269	0.491625	-6.70366	2.03261e-11	7.64304e-10
NIPSNAP1	50.1957	8.38571	71.1007	2.94148	0.373739	6.7028	2.04463e-11	7.67479e-10
PHF21B	5.09066	0.0327273	7.61962	3.06116	0.898736	6.70267	2.0465e-11	7.67479e-10
GPT2	28.5691	63.3638	11.1718	-2.40271	0.611443	-6.69366	2.17661e-11	8.15186e-10
SYNGR2	38.2821	75.0026	19.9218	-1.86104	0.495904	-6.68781	2.26534e-11	8.47293e-10
WIPI1	35.3323	43.6143	31.1913	-0.470836	0.370662	-6.68751	2.27001e-11	8.47914e-10
ALDH1L1	14.9155	40.6912	2.0276	-3.7835	0.797467	-6.68315	2.33854e-11	8.72355e-10
SLC16A12	0.452944	0.97959	0.189621	-0.734699	0.493022	-6.68173	2.36141e-11	8.79717e-10
SPATS2L	20.5257	22.9596	19.3087	-0.238505	0.228707	-6.68116	2.37052e-11	8.81948e-10
MYBPC1	742.951	2224.35	2.25282	-9.41812	1.77141	-6.6801	2.38782e-11	8.8721e-10
ALDH18A1	35.6356	5.45047	50.7282	3.00348	0.334903	6.67936	2.39984e-11	8.90504e-10
PIAS3	46.4078	9.61984	64.8018	2.63136	0.193289	6.67896	2.40645e-11	8.91779e-10
RNPEPL1	19.8029	32.1323	13.6382	-1.1785	0.370032	-6.67707	2.4376e-11	9.02134e-10
ENG	35.6464	42.2385	32.3504	-0.374614	0.301221	-6.6764	2.44878e-11	9.05085e-10
KNL1	4.54078	0.178688	6.72183	2.71176	0.484327	6.67214	2.52108e-11	9.30586e-10
SERPINB6	57.5774	69.0863	51.823	-0.407966	0.220165	-6.66933	2.56974e-11	9.47306e-10
POLE2	27.9187	5.10537	39.3254	2.72354	0.346007	6.66877	2.57959e-11	9.49694e-10
CHD3	132.58	10.8999	193.419	4.03016	0.416612	6.66704	2.61021e-11	9.59713e-10
SOD3	31.035	84.4515	4.32679	-4.00377	0.776512	-6.66541	2.6392e-11	9.69106e-10
GAS2L2	0.363169	1.03014	0.029686	-0.979372	0.916049	-6.66203	2.70062e-11	9.9037e-10
MAP4	126.711	208.166	85.9839	-1.26583	0.453849	-6.66146	2.71117e-11	9.92943e-10
EME2	10.2357	2.21404	14.2465	2.24602	0.261181	6.65881	2.76053e-11	1.00971e-09
ARHGAP33	39.8121	4.60454	57.4158	3.38169	0.317706	6.65525	2.82819e-11	1.03312e-09
PSMD4	108.989	97.1118	114.927	0.240719	0.21373	-6.65482	2.83643e-11	1.03478e-09
SCD5	15.5321	1.86653	22.3649	3.02697	0.361985	6.64759	2.97931e-11	1.0855e-09
CCDC9B	7.916	20.8511	1.44843	-3.15778	0.808593	-6.63426	3.26142e-11	1.18675e-09
PTTG1	29.1217	2.8354	42.2649	3.49575	0.438227	6.62686	3.42893e-11	1.2461e-09
PSMC1	103.442	122.024	94.1514	-0.37064	0.255787	-6.62482	3.47676e-11	1.26185e-09
UNC45B	7.97908	23.1666	0.385317	-4.12473	1.22054	-6.62254	3.53074e-11	1.27979e-09
NSFL1C	43.1929	39.0074	45.2856	0.210297	0.189559	-6.6205	3.57989e-11	1.29594e-09
CLUL1	23.5759	0.61939	35.0542	4.47665	0.808352	6.61856	3.62705e-11	1.31132e-09
NXPH4	67.2295	1.66237	100.013	5.24569	0.790392	6.61623	3.68477e-11	1.33048e-09
UBE2C	21.4874	0.847157	31.8076	4.15065	0.641557	6.61582	3.69493e-11	1.33245e-09
CDCA8	4.43599	0.087366	6.6103	2.80712	0.780986	6.61441	3.73044e-11	1.34353e-09
RAPSN	4.63062	13.329	0.281447	-3.48309	1.21873	-6.60977	3.84906e-11	1.38448e-09
MAP7D1	67.5049	96.364	53.0753	-0.848418	0.366344	-6.60723	3.91568e-11	1.40665e-09
OAZ1	364.1	455.986	318.158	-0.517882	0.265594	-6.60085	4.08806e-11	1.4667e-09
CHST1	24.9581	1.02878	36.9228	4.22438	0.558222	6.59567	4.23343e-11	1.51693e-09
EDN3	52.6098	0.729385	78.5499	5.52353	0.750575	6.59447	4.26785e-11	1.52731e-09
FITM1	29.3396	84.9248	1.54701	-5.0762	1.19544	-6.592	4.33939e-11	1.54956e-09
NUPR1	20.419	55.6649	2.79609	-3.89987	0.599656	-6.59194	4.34101e-11	1.54956e-09
TBC1D1	22.5534	25.6313	21.0144	-0.274677	0.291793	-6.59148	4.35449e-11	1.5524e-09
JARID2	15.1613	2.86612	21.3089	2.52866	0.249812	6.59034	4.38827e-11	1.56247e-09
FSTL4	7.21974	0.301882	10.6787	3.1652	0.731708	6.58992	4.40067e-11	1.56491e-09
RNF14	26.8356	29.939	25.2839	-0.235246	0.205889	-6.58944	4.41495e-11	1.568e-09
ITSN2	18.4286	14.4797	20.4031	0.467438	0.182013	-6.58744	4.47464e-11	1.5872e-09
SLC19A2	9.00484	17.2652	4.87467	-1.63651	0.54307	-6.58714	4.48368e-11	1.58841e-09
KIF3A	11.4581	1.82242	16.276	2.61376	0.253344	6.58604	4.51717e-11	1.59826e-09
RSPO3	4.0624	10.8574	0.664918	-2.83226	0.904254	-6.58479	4.55538e-11	1.60938e-09
MSH2	16.7851	4.25871	23.0483	2.19316	0.17954	6.58464	4.56002e-11	1.60938e-09
AQP3	2.33955	3.51279	1.75293	-0.713054	0.327618	-6.583	4.61059e-11	1.62519e-09
MYOCD	0.163006	0.431848	0.0285847	-0.477217	0.932701	-6.58009	4.70156e-11	1.65519e-09
TPSAB1	4.05516	10.9697	0.597872	-2.90517	0.806497	-6.57892	4.7389e-11	1.66625e-09
C20orf96	20.4151	2.53938	29.353	3.10027	0.385226	6.5775	4.78422e-11	1.68009e-09
AK3	51.7161	82.2229	36.4627	-1.15153	0.43337	-6.57522	4.85823e-11	1.70395e-09
PNPLA2	139.362	293.549	62.2675	-2.21897	0.529223	-6.57257	4.94551e-11	1.73241e-09
PYURF	54.8625	45.0337	59.7769	0.400833	0.137428	-6.57201	4.96393e-11	1.7367e-09
SFI1	38.942	5.83727	55.4943	3.04661	0.286584	6.57108	4.99508e-11	1.74543e-09
ACIN1	190.525	44.4343	263.571	2.5418	0.14987	6.5706	5.01124e-11	1.7489e-09
AK1	114.033	277.17	32.4648	-3.05525	0.716889	-6.56994	5.03369e-11	1.75456e-09
RUFY1	18.6596	2.31584	26.8315	3.06927	0.385179	6.56777	5.10749e-11	1.77809e-09
PTP4A2	90.9452	105.399	83.7185	-0.328731	0.286644	-6.56493	5.20562e-11	1.81001e-09
SLC16A4	23.4108	2.48801	33.8723	3.32161	0.40065	6.56421	5.23111e-11	1.81635e-09
EPAS1	43.0863	89.2342	20.0123	-2.10244	0.664616	-6.56405	5.23673e-11	1.81635e-09
PYROXD2	7.36561	13.9208	4.08802	-1.55215	0.604554	-6.56089	5.34862e-11	1.85279e-09
MORN4	19.0667	3.67447	26.7628	2.57028	0.310216	6.56072	5.35497e-11	1.85279e-09
PASK	6.68126	1.50837	9.26771	2.03329	0.251287	6.56032	5.36942e-11	1.85551e-09
COL1A1	1222.31	93.5324	1786.7	4.24115	0.503671	6.55772	5.46378e-11	1.88581e-09
AC241952.1	7.52225	18.8763	1.84524	-2.80442	0.801197	-6.5561	5.52328e-11	1.90401e-09
AGBL1	1.71431	4.83699	0.152974	-2.33987	0.996327	-6.55391	5.605e-11	1.92982e-09
FITM2	5.36686	6.35385	4.87337	-0.324311	0.243133	-6.55225	5.66777e-11	1.94905e-09
ANAPC16	66.7935	93.8378	53.2713	-0.805273	0.343351	-6.55162	5.69166e-11	1.95488e-09
AL158214.1	80.7604	0	121.141	6.9324	3.43439	6.54927	5.78185e-11	1.98343e-09
NDUFB7	182.809	276.079	136.174	-1.01429	0.37454	-6.54122	6.10199e-11	2.09071e-09
DEPDC1	2.25417	0.172039	3.29523	1.87371	0.566068	6.53949	6.17293e-11	2.11245e-09
TNIP2	16.8506	14.9508	17.8005	0.237136	0.191011	-6.5378	6.2431e-11	2.13387e-09
FAM78A	2.81852	5.47278	1.49139	-1.37743	0.605512	-6.53325	6.43569e-11	2.19703e-09
MAPKAP1	36.2504	39.1633	34.7939	-0.166166	0.195552	-6.52959	6.59512e-11	2.24873e-09
RNF212	96.4875	5.01348	142.225	4.57394	0.541724	6.52741	6.69177e-11	2.27893e-09
NATD1	8.16877	13.8625	5.32192	-1.23324	0.420756	-6.52598	6.75573e-11	2.29793e-09
MYBPC2	80.21	238.52	1.05505	-6.86482	1.50379	-6.51719	7.16388e-11	2.43192e-09
CBX4	52.2846	4.31156	76.2711	3.86272	0.446464	6.51712	7.16693e-11	2.43192e-09
SDHB	63.6439	103.188	43.8719	-1.2153	0.47635	-6.51622	7.21014e-11	2.44364e-09
NFKBIA	61.1686	85.4768	49.0145	-0.789965	0.31048	-6.51574	7.23339e-11	2.44857e-09
CUL7	32.2806	6.03767	45.4021	2.72102	0.23844	6.50986	7.5223e-11	2.54332e-09
P3H3	41.3958	3.91925	60.1341	3.63547	0.418264	6.50931	7.54948e-11	2.54944e-09
FGD4	2.73569	5.56192	1.32257	-1.49839	0.580701	-6.50838	7.59654e-11	2.56226e-09
CHCHD4	8.28189	10.8027	7.0215	-0.557167	0.317013	-6.50602	7.71671e-11	2.59968e-09
GTSE1	5.10568	0.369865	7.47359	2.62894	0.530775	6.50074	7.99258e-11	2.6894e-09
KCNN1	5.87408	0.0454373	8.7884	3.22697	0.874352	6.49826	8.12529e-11	2.73079e-09
RCN1P2	24.0468	2.61555	34.7625	3.30616	0.364898	6.49583	8.25778e-11	2.77202e-09
SNAPIN	32.4347	39.3512	28.9764	-0.428783	0.286312	-6.49526	8.28896e-11	2.77917e-09
CILP2	13.7976	0.111595	20.6406	4.28304	0.964257	6.49091	8.53175e-11	2.85717e-09
PCMT1	44.3197	56.8753	38.0419	-0.567924	0.339261	-6.49044	8.5585e-11	2.86273e-09
CYP4F12	1.92639	4.90976	0.434706	-2.04234	0.681089	-6.48983	8.5934e-11	2.87099e-09
ZMYM3	25.8098	4.89648	36.2664	2.65995	0.238068	6.48834	8.67869e-11	2.89605e-09
TCF19	3.64452	0.00655133	5.4635	2.6829	1.29877	6.48615	8.80594e-11	2.93504e-09
SMIM37	114.871	257.916	43.3481	-2.54554	0.668547	-6.48429	8.91528e-11	2.96797e-09
GRIK3	13.3894	0.362863	19.9026	3.93897	0.84379	6.47724	9.34173e-11	3.10626e-09
KLHL33	2.72755	7.65951	0.261562	-2.77907	0.986434	-6.47677	9.37041e-11	3.11213e-09
GRIN2D	6.70124	0.191766	9.95598	3.20055	0.760652	6.47489	9.48802e-11	3.14748e-09
TRIM59	4.42368	0.179736	6.54565	2.67718	0.58062	6.47411	9.53721e-11	3.16007e-09
GINS1	5.48825	0.669672	7.89754	2.41384	0.416913	6.47348	9.5771e-11	3.16956e-09
PSPC1	43.1479	10.8717	59.286	2.3443	0.184788	6.47132	9.71512e-11	3.21146e-09
MEGF11	12.7728	0.346585	18.9859	3.89161	0.837027	6.46921	9.85169e-11	3.25279e-09
RNF144B	3.4129	7.9332	1.15274	-2.053	0.684323	-6.4681	9.924e-11	3.27283e-09
PLCL2	3.84667	6.96609	2.28696	-1.27712	0.484578	-6.46672	1.00153e-10	3.29908e-09
PCYT1B	3.8539	0.232386	5.66466	2.43508	0.495404	6.46488	1.01376e-10	3.33547e-09
POPDC2	6.2261	12.8711	2.90361	-1.8292	0.710308	-6.46405	1.01941e-10	3.35012e-09
TMOD4	60.7907	173.87	4.25089	-5.05758	1.29183	-6.46093	1.04059e-10	3.41219e-09
MYH7B	18.6724	49.5888	3.21419	-3.58549	0.903893	-6.46092	1.04071e-10	3.41219e-09
PDE11A	1.46261	3.3381	0.524866	-1.50838	0.661871	-6.46043	1.04404e-10	3.41911e-09
RAD51AP1	6.25027	0.826635	8.96209	2.44726	0.444556	6.45706	1.06753e-10	3.49198e-09
STUB1	62.8845	71.7825	58.4356	-0.292265	0.248727	-6.45415	1.08829e-10	3.55574e-09
PPP2R5A	23.0286	43.0941	12.9959	-1.65558	0.427408	-6.45191	1.10451e-10	3.60457e-09
CLIC5	12.763	36.7179	0.785566	-4.40079	1.23905	-6.44829	1.13116e-10	3.68726e-09
TUBB	4.19031	0	6.28547	2.86502	1.29099	6.44724	1.13904e-10	3.70865e-09
TEK	3.27449	5.92823	1.94762	-1.23293	0.44876	-6.43997	1.195e-10	3.88638e-09
TMEM245	13.3659	18.2633	10.9173	-0.692799	0.331891	-6.43918	1.20121e-10	3.90205e-09
RRP7BP	31.7202	3.27188	45.9443	3.45801	0.395101	6.43688	1.21955e-10	3.95708e-09
CRMP1	31.7442	3.15824	46.0372	3.49976	0.465886	6.4338	1.24451e-10	4.0334e-09
WNT10B	5.99645	0.316379	8.83649	2.90157	0.572679	6.43163	1.26239e-10	4.08665e-09
COMMD7	24.5665	23.6677	25.016	0.0767732	0.208924	-6.43043	1.27248e-10	4.11458e-09
PRPH	25.4082	1.68739	37.2686	3.83188	0.555415	6.43021	1.2743e-10	4.11575e-09
ZNF660	3.11137	0.718366	4.30787	1.6271	0.261716	6.42555	1.31393e-10	4.23889e-09
FYCO1	23.6755	46.8447	12.0908	-1.8698	0.598639	-6.42464	1.32186e-10	4.2596e-09
BATF2	0.436287	1.12137	0.0937467	-0.955716	0.891384	-6.42323	1.3341e-10	4.29413e-09
GSN	421.171	1014.12	124.694	-3.01367	0.667234	-6.42159	1.34859e-10	4.33582e-09
OPTN	98.7045	184.525	55.794	-1.70781	0.584663	-6.42055	1.35786e-10	4.36063e-09
TMEM11	18.79	26.5858	14.8922	-0.795607	0.36224	-6.41861	1.37523e-10	4.41137e-09
EMILIN3	25.0309	0.214722	37.439	4.98387	0.936183	6.41732	1.38692e-10	4.44383e-09
ADAMTSL4	15.7701	36.3131	5.49859	-2.52148	0.695689	-6.41348	1.42236e-10	4.55192e-09
ZNF354C	7.8215	1.46495	10.9998	2.28337	0.284201	6.41331	1.42389e-10	4.55192e-09
ADGRE5	14.2496	18.9009	11.924	-0.622781	0.317616	-6.41276	1.42905e-10	4.56323e-09
TMEM126A	32.5172	36.7681	30.3918	-0.266782	0.272476	-6.41067	1.44879e-10	4.62105e-09
STAC3	178.083	488.829	22.7106	-4.36868	1.07367	-6.40891	1.46566e-10	4.66443e-09
FMO2	14.9227	44.214	0.276995	-5.14595	1.35169	-6.40877	1.46702e-10	4.66443e-09
SLC12A5	26.3589	0.925083	39.0758	4.37974	0.849835	6.40873	1.46736e-10	4.66443e-09
CDK2	32.5097	6.48368	45.5227	2.63611	0.28028	6.40607	1.49322e-10	4.74127e-09
KDELC1	14.2069	1.25189	20.6844	3.26745	0.396406	6.40542	1.49959e-10	4.75613e-09
TPD52L1	18.9498	41.2495	7.8	-2.26336	0.605664	-6.4044	1.50957e-10	4.7824e-09
CACNA1C	12.7196	1.13522	18.5118	3.19189	0.455211	6.4037	1.51654e-10	4.7991e-09
CAPZA2	89.7777	93.309	88.0121	-0.083395	0.321039	-6.40296	1.52396e-10	4.81714e-09
KHDC1	8.06569	0.958732	11.6192	2.68762	0.321697	6.39972	1.55665e-10	4.91496e-09
ROCK2	12.9458	15.3842	11.7266	-0.364456	0.279752	-6.39866	1.56746e-10	4.94356e-09
SDHA	66.057	105.201	46.485	-1.16125	0.464584	-6.39777	1.57658e-10	4.96675e-09
ACTA1	4294.18	12840.5	21.0432	-9.18626	1.71445	-6.39548	1.60047e-10	5.03162e-09
YIPF7	8.16783	23.806	0.348745	-4.201	1.36472	-6.39545	1.60074e-10	5.03162e-09
HADHB	140.758	247.269	87.5021	-1.48812	0.510611	-6.38669	1.69516e-10	5.32247e-09
HGF	0.811955	1.9559	0.239982	-1.25328	0.675279	-6.38572	1.70594e-10	5.35034e-09
CRABP2	315.119	17.3963	463.981	4.65968	0.619724	6.38554	1.70799e-10	5.35081e-09
PRKG1	3.82032	8.23289	1.61403	-1.82051	0.732603	-6.38459	1.71862e-10	5.37814e-09
LMOD2	127.651	381.602	0.675429	-7.83517	1.73138	-6.38245	1.74274e-10	5.44756e-09
RCSD1	7.98419	18.5074	2.7226	-2.38964	0.828258	-6.38052	1.76485e-10	5.51056e-09
AGL	19.9875	47.6031	6.17963	-2.75907	0.723661	-6.37972	1.7741e-10	5.53331e-09
UHRF1	6.76975	0.350673	9.97928	3.02303	0.561415	6.37293	1.85456e-10	5.77786e-09
MAPRE3	20.2179	27.7503	16.4518	-0.720207	0.396851	-6.37237	1.86127e-10	5.79235e-09
SDHD	77.6944	105.143	63.9699	-0.708169	0.359431	-6.37001	1.89019e-10	5.87585e-09
PTPN11	32.2379	36.4355	30.1392	-0.265679	0.249313	-6.36881	1.90506e-10	5.91556e-09
ITGA8	0.722827	1.31122	0.42863	-0.694022	0.620448	-6.36776	1.91808e-10	5.94941e-09
STOM	38.9389	66.7313	25.0427	-1.37894	0.418997	-6.36608	1.93925e-10	6.00305e-09
TNFSF12	20.4294	25.4278	17.9302	-0.481368	0.316469	-6.36605	1.93963e-10	6.00305e-09
COL9A2	46.3952	1.23616	68.9747	4.96774	0.761281	6.36107	2.00358e-10	6.19417e-09
TMEM131L	7.40182	8.52382	6.84082	-0.280537	0.287238	-6.36082	2.00673e-10	6.1971e-09
HDAC11	8.51514	10.7561	7.39464	-0.485874	0.457815	-6.358	2.04391e-10	6.30415e-09
JSRP1	23.7605	65.247	3.01729	-4.04356	1.06087	-6.35786	2.04587e-10	6.30415e-09
RRM2	10.9687	0.647948	16.1291	3.3777	0.572244	6.35672	2.06103e-10	6.3439e-09
ZNF512	38.1605	7.13628	53.6726	2.74838	0.244757	6.35452	2.09077e-10	6.42844e-09
EGF	3.27179	9.72122	0.0470782	-3.35603	1.6921	-6.34968	2.15764e-10	6.62679e-09
SHISAL1	4.725	0.101372	7.03681	2.86732	0.766344	6.34891	2.16846e-10	6.64598e-09
CHMP4B	58.9057	62.5083	57.1043	-0.128301	0.237914	-6.34886	2.16922e-10	6.64598e-09
MOB3C	8.04223	8.41757	7.85456	-0.0889347	0.225381	-6.34873	2.17096e-10	6.64598e-09
ASB11	5.05569	14.8596	0.153747	-3.78095	1.30691	-6.34842	2.17544e-10	6.65246e-09
SSX1	19.6642	0.224794	29.3838	4.63269	0.983494	6.3482	2.17846e-10	6.65447e-09
MRLN	17.599	49.3378	1.72959	-4.20489	0.90223	-6.34772	2.18533e-10	6.66632e-09
TRIM55	2.87156	8.53296	0.0408528	-3.19516	1.5816	-6.34759	2.18708e-10	6.66632e-09
GPC2	8.82968	0.468736	13.0101	3.25383	0.443526	6.3448	2.22717e-10	6.7812e-09
RPL10L	15.4517	0	23.1775	4.59559	3.43449	6.34355	2.24537e-10	6.82922e-09
COL4A3	3.69967	10.4701	0.314471	-3.12532	0.995889	-6.34134	2.27769e-10	6.92006e-09
FNDC5	36.3907	98.0888	5.54172	-3.92098	0.968142	-6.33985	2.29989e-10	6.97998e-09
MYADML2	5.04618	14.6998	0.219352	-3.68656	1.24045	-6.33777	2.33109e-10	7.06704e-09
ABCB10	5.53066	6.04524	5.27337	-0.167409	0.264385	-6.33647	2.35088e-10	7.11936e-09
ZNF385B	3.26546	6.87675	1.45981	-1.67905	0.664152	-6.33585	2.36043e-10	7.1406e-09
CBX8	22.6989	1.39967	33.3485	3.83934	0.597901	6.33505	2.37267e-10	7.16995e-09
ECM1	6.97942	15.1236	2.9073	-2.04493	0.540468	-6.33236	2.41434e-10	7.28804e-09
SULT1C4	18.1332	1.55334	26.4232	3.42494	0.440493	6.32752	2.49128e-10	7.51225e-09
ANGPTL5	1.15282	3.36665	0.045904	-2.06178	1.04532	-6.32728	2.49515e-10	7.51586e-09
ALDOA	1058.38	2412.1	381.514	-2.65731	0.673119	-6.32344	2.55811e-10	7.69729e-09
AOX1	3.96882	10.2785	0.814002	-2.63632	0.899519	-6.3232	2.56205e-10	7.70092e-09
SUCLA2	42.5276	58.4502	34.5662	-0.741173	0.405286	-6.31666	2.67279e-10	8.02521e-09
AC084880.1	4.92561	14.7111	0.0328852	-3.92703	1.54847	-6.31345	2.7288e-10	8.18466e-09
FBXO44	28.744	6.91265	39.6597	2.36137	0.222456	6.31307	2.73557e-10	8.19623e-09
NUSAP1	23.9094	2.77284	34.4778	3.23319	0.451011	6.31188	2.75659e-10	8.25043e-09
GCNT4	0.207558	0.395717	0.113479	-0.325933	0.518016	-6.3095	2.79932e-10	8.36731e-09
CFLAR	45.4537	60.0279	38.1666	-0.639844	0.28567	-6.30938	2.80158e-10	8.36731e-09
A4GALT	10.2321	17.9512	6.37262	-1.36204	0.608539	-6.30911	2.80643e-10	8.3729e-09
NPAS3	5.78487	0.662576	8.34601	2.49093	0.545028	6.30644	2.85522e-10	8.50947e-09
NOSTRIN	2.99772	7.34571	0.823721	-2.19415	0.651005	-6.29634	3.04747e-10	9.07283e-09
STX1B	8.95794	0.549022	13.1624	3.19264	0.570568	6.29386	3.09673e-10	9.20201e-09
KIFC1	6.9192	0.08819	10.3347	3.38074	0.799454	6.29382	3.0974e-10	9.20201e-09
KIF13A	23.0669	26.6637	21.2685	-0.312988	0.372608	-6.29347	3.10442e-10	9.21315e-09
FHL3	124.052	340.667	15.7442	-4.35086	0.973292	-6.29241	3.12566e-10	9.26643e-09
ABLIM1	37.7059	42.9911	35.0633	-0.286677	0.288024	-6.28925	3.19008e-10	9.44745e-09
ALX4	10.3473	0.168784	15.4365	3.81382	0.774469	6.28906	3.19391e-10	9.44888e-09
SERTAD4	42.807	1.34355	63.5387	4.7834	0.650119	6.28811	3.21363e-10	9.49725e-09
BIN1	116.038	294.049	27.0323	-3.3958	0.793073	-6.28703	3.236e-10	9.55331e-09
ELFN2	5.3106	0.18847	7.87166	2.9001	0.775782	6.28419	3.29565e-10	9.71924e-09
DST	63.5635	63.9503	63.3702	-0.0129436	0.38704	-6.28182	3.3464e-10	9.84915e-09
CAB39	30.0201	49.1497	20.4554	-1.2249	0.445933	-6.2818	3.3467e-10	9.84915e-09
PIMREG	6.77879	0.331849	10.0023	3.0463	0.778263	6.27841	3.42063e-10	1.00562e-08
SLC25A4	93.0596	255.169	12.005	-4.29996	1.00908	-6.27783	3.43322e-10	1.00827e-08
ZNF276	44.9917	8.06987	63.4527	2.82909	0.249521	6.27553	3.48448e-10	1.02138e-08
FAM13C	4.00086	7.26682	2.36788	-1.29549	0.64167	-6.27548	3.48546e-10	1.02138e-08
TPM2	1887.47	4941.01	360.695	-3.77225	0.917571	-6.27534	3.48873e-10	1.02138e-08
NKX3-1	0.379076	0.986733	0.075247	-0.88573	0.834601	-6.2751	3.49403e-10	1.02187e-08
PREB	30.8732	35.6352	28.4922	-0.312899	0.278578	-6.27491	3.4983e-10	1.02205e-08
BARX2	28.8225	0.63705	42.9152	4.74555	0.830057	6.27453	3.50697e-10	1.02353e-08
SLC48A1	13.9141	14.8131	13.4646	-0.128595	0.256477	-6.27369	3.52595e-10	1.02726e-08
RPSAP25	16.0059	0.023689	23.997	4.60991	3.43446	6.27364	3.52707e-10	1.02726e-08
USP13	17.6828	43.6471	4.70058	-2.96939	0.804243	-6.27341	3.53215e-10	1.02768e-08
COX7A1	182.978	508.194	20.3698	-4.57457	1.04787	-6.27244	3.55433e-10	1.03306e-08
PIANP	13.1794	0.105062	19.7165	4.22858	0.993634	6.27228	3.55797e-10	1.03306e-08
TMEM132E	5.38443	0.034663	8.05931	3.13024	1.01727	6.27121	3.58257e-10	1.03913e-08
TP63	2.41383	6.77627	0.23261	-2.65736	1.10282	-6.27009	3.60844e-10	1.04556e-08
RNF208	2.95865	5.70655	1.5847	-1.37557	0.529838	-6.26807	3.65545e-10	1.05809e-08
ESRRA	18.867	32.7554	11.9228	-1.3852	0.549651	-6.26704	3.67986e-10	1.06406e-08
STIL	3.122	0.478727	4.44364	1.88022	0.347289	6.26683	3.68464e-10	1.06406e-08
CDK1	15.9662	2.08818	22.9053	2.9525	0.492259	6.26672	3.68741e-10	1.06406e-08
TCF15	1.24491	2.59683	0.568944	-1.19693	0.615906	-6.26488	3.73119e-10	1.07559e-08
MAGED1	137.445	24.0342	194.151	2.96262	0.274597	6.26307	3.77464e-10	1.087e-08
CEBPG	11.5596	15.1727	9.75305	-0.588814	0.299255	-6.26192	3.80273e-10	1.09397e-08
LMNB2	26.2618	3.89325	37.4461	2.97397	0.327764	6.25773	3.9063e-10	1.12262e-08
ATP2A2	284.978	719.493	67.7214	-3.39015	0.831244	-6.25692	3.92656e-10	1.12729e-08
STAC	0.523732	1.12399	0.223602	-0.795644	0.653968	-6.25545	3.96383e-10	1.13655e-08
DIRC2	6.23761	8.83098	4.94093	-0.726647	0.42606	-6.25533	3.96686e-10	1.13655e-08
PGAM2	207.195	616.556	2.51461	-7.45706	1.50756	-6.25504	3.97409e-10	1.13746e-08
PBK	6.49238	0.270248	9.60345	3.06135	0.746849	6.25381	4.0055e-10	1.14529e-08
DUSP3	26.1568	52.6145	12.9279	-1.94465	0.571089	-6.24968	4.11284e-10	1.17411e-08
CASQ1	146.631	432.274	3.80997	-6.49311	1.50908	-6.24962	4.11464e-10	1.17411e-08
AC240508.1	11.3372	0.924372	16.5436	3.18849	0.477149	6.24946	4.11879e-10	1.17411e-08
PTCH1	23.3012	4.4091	32.7473	2.64131	0.427195	6.2407	4.35613e-10	1.24051e-08
MRAS	23.0848	44.5791	12.3377	-1.77287	0.459864	-6.24	4.37571e-10	1.24482e-08
C22orf39	32.0164	44.7239	25.6626	-0.778131	0.36415	-6.23954	4.38848e-10	1.2472e-08
FIS1	140.484	178.765	121.344	-0.555176	0.317624	-6.23817	4.4272e-10	1.25693e-08
ZNF783	13.2788	3.28731	18.2746	2.16855	0.218867	6.23684	4.46491e-10	1.26636e-08
CPB1	1.3579	3.05506	0.509317	-1.42583	0.688074	-6.23514	4.51385e-10	1.27847e-08
PIF1	7.0455	0.407347	10.3646	3.01349	0.452166	6.23504	4.51668e-10	1.27847e-08
KIF4A	2.2955	0.067791	3.40935	2.04594	0.650312	6.23229	4.59678e-10	1.29984e-08
ARPP21	6.00459	17.5854	0.214186	-3.93611	1.45731	-6.23078	4.6413e-10	1.31111e-08
PPP1R16B	1.54511	2.95429	0.840515	-1.10331	0.62168	-6.22901	4.69407e-10	1.32469e-08
GPNMB	42.3984	121.656	2.76933	-5.02417	1.08586	-6.22658	4.76719e-10	1.34397e-08
PKIG	31.3393	33.3727	30.3226	-0.134056	0.235337	-6.21899	5.0038e-10	1.40927e-08
FANCC	9.22781	2.25329	12.7151	2.07579	0.220445	6.21738	5.05515e-10	1.42231e-08
HACD1	6.55115	15.0353	2.30907	-2.27675	0.668207	-6.21601	5.09949e-10	1.43335e-08
AGPAT3	15.7918	20.4551	13.4601	-0.569236	0.346094	-6.21081	5.27125e-10	1.48015e-08
ZNF330	26.9864	31.5425	24.7083	-0.340093	0.273265	-6.21033	5.28741e-10	1.48321e-08
ZNF280C	3.45823	0.521243	4.92672	1.96198	0.311731	6.21002	5.29789e-10	1.48467e-08
CAV3	11.4765	34.0483	0.190612	-4.87957	1.45631	-6.20951	5.31491e-10	1.48796e-08
TMEM14B	69.5816	71.6572	68.5439	-0.0631828	0.242342	-6.2023	5.56442e-10	1.55627e-08
PCDHA2	3.38973	0	5.0846	2.60516	1.39686	6.2015	5.59278e-10	1.56249e-08
PURG	5.50914	0.24087	8.14327	2.88136	0.92786	6.20136	5.59774e-10	1.56249e-08
HFE2	37.3723	111.628	0.24421	-6.5002	1.63988	-6.19962	5.66004e-10	1.57831e-08
AVPR2	1.16436	2.64814	0.422473	-1.35876	0.681098	-6.19647	5.77452e-10	1.60864e-08
KCNJ11	5.32544	14.3954	0.790458	-3.1041	1.02976	-6.19487	5.83335e-10	1.62342e-08
FUS	386.468	94.4474	532.478	2.48265	0.211187	6.1924	5.92566e-10	1.64749e-08
MAPK15	35.9989	0.846146	53.5753	4.88566	0.799568	6.1901	6.01279e-10	1.67006e-08
TECRL	10.2945	28.7777	1.05296	-3.85845	1.04415	-6.18857	6.07115e-10	1.68461e-08
MAGEE1	4.29593	0.691173	6.09831	2.06945	0.294165	6.186	6.1711e-10	1.71066e-08
ARL5B	10.1785	1.85341	14.341	2.42664	0.309663	6.18348	6.27022e-10	1.73642e-08
C14orf37	22.7385	7.22626	30.4946	1.9368	0.294282	6.17741	6.51628e-10	1.80279e-08
NUF2	8.67264	0.302274	12.8578	3.4116	0.623573	6.17523	6.60684e-10	1.82606e-08
SPIN3	14.782	3.42145	20.4623	2.27921	0.208743	6.17448	6.63814e-10	1.83291e-08
ABCC9	6.59623	14.7274	2.53065	-2.15527	0.631569	-6.16839	6.89881e-10	1.90302e-08
CENPU	10.9351	0.955544	15.9249	3.11351	0.468118	6.16566	7.01881e-10	1.93422e-08
LMNB1	16.5707	1.75044	23.9808	3.18308	0.585528	6.16471	7.06116e-10	1.94389e-08
KCTD13	16.0308	4.89084	21.6008	1.93982	0.213549	6.16457	7.06767e-10	1.94389e-08
BEX2	37.769	1.63739	55.8349	4.42959	0.537997	6.1641	7.08835e-10	1.94767e-08
AL589743.1	87.0558	5.9316	127.618	4.21376	0.546912	6.16387	7.09897e-10	1.94869e-08
PRC1	18.8978	3.05427	26.8195	2.77858	0.491998	6.1597	7.28838e-10	1.99873e-08
CRISPLD1	85.6875	0.717993	128.172	6.23243	1.05159	6.15894	7.32332e-10	2.00636e-08
PINLYP	25.8941	4.34077	36.6708	2.81833	0.281223	6.15734	7.39776e-10	2.02479e-08
HOGA1	1.97294	3.84413	1.03735	-1.24954	0.534485	-6.15033	7.73238e-10	2.11432e-08
GSTO1	51.7603	71.2341	42.0234	-0.74756	0.371911	-6.14487	8.00299e-10	2.18619e-08
CTXN1	19.0878	0.627355	28.318	4.17119	0.727656	6.14363	8.06557e-10	2.20115e-08
ATP5MC3	154.307	202.874	130.024	-0.637854	0.31635	-6.14178	8.16009e-10	2.22479e-08
ZNF467	18.8934	2.14045	27.2698	3.17022	0.363898	6.13867	8.32166e-10	2.26665e-08
ZIC5	19.9374	0.497789	29.6572	4.35532	0.840112	6.13755	8.38037e-10	2.28043e-08
NGFR	58.0421	3.18032	85.4731	4.37056	0.642662	6.1371	8.40414e-10	2.28469e-08
P2RY14	1.45871	2.97984	0.698148	-1.22875	0.70069	-6.13219	8.66799e-10	2.35415e-08
FGD1	13.5819	1.84572	19.4499	2.84523	0.347116	6.13192	8.68267e-10	2.35586e-08
DEXI	22.2946	34.3179	16.283	-1.03104	0.388434	-6.12899	8.84388e-10	2.3973e-08
MAMDC2	3.35115	7.99839	1.02753	-2.14994	0.71965	-6.12879	8.855e-10	2.398e-08
CBX2	12.692	0.482434	18.7968	3.73923	0.629212	6.12855	8.86809e-10	2.39924e-08
TRIM46	10.3067	0.204747	15.3576	3.76316	0.856854	6.12699	8.95582e-10	2.42065e-08
GLDN	1.74349	4.29767	0.466401	-1.85308	0.717169	-6.12612	9.00461e-10	2.4315e-08
SUCLG2	32.4471	38.6851	29.3281	-0.387943	0.302503	-6.12586	9.01972e-10	2.43325e-08
CPT1B	30.4784	54.2807	18.5773	-1.49759	0.709187	-6.1247	9.08558e-10	2.44867e-08
FILIP1	4.48129	11.0975	1.1732	-2.47681	0.888756	-6.12217	9.231e-10	2.48549e-08
PRR3	19.7298	3.28692	27.9513	2.75562	0.406343	6.12156	9.26649e-10	2.49266e-08
IL15RA	4.18452	10.3581	1.09774	-2.43681	0.757655	-6.1188	9.42816e-10	2.53373e-08
HYDIN	2.97259	0.26267	4.32756	2.077	0.490596	6.1185	9.44596e-10	2.53609e-08
GAB2	4.19789	8.93919	1.82724	-1.81374	0.534988	-6.11821	9.46321e-10	2.5383e-08
AL445665.1	1.70816	4.21247	0.456013	-1.83994	0.885443	-6.11544	9.62915e-10	2.58036e-08
UQCRFS1	26.1782	45.4319	16.5514	-1.40353	0.514592	-6.11201	9.83844e-10	2.63393e-08
CACNG6	5.42512	16.2035	0.035937	-4.05369	1.68263	-6.111	9.90115e-10	2.6482e-08
PDLIM1	44.3022	111.522	10.6922	-3.2666	0.836585	-6.10955	9.99117e-10	2.66975e-08
PSD	16.059	1.14075	23.5182	3.51766	0.549512	6.10849	1.00579e-09	2.68503e-08
TNPO2	76.4347	19.2632	105.02	2.38741	0.187285	6.10614	1.02069e-09	2.72221e-08
GTF3A	72.6578	92.5083	62.7325	-0.553066	0.346124	-6.10172	1.04936e-09	2.79604e-08
PIGC	43.7421	11.9294	59.6484	2.22982	0.184029	6.10153	1.05057e-09	2.79611e-08
ADHFE1	19.2502	36.8448	10.4528	-1.72439	0.594113	-6.10141	1.05137e-09	2.79611e-08
RAD23A	127.2	213.831	83.8839	-1.33964	0.508955	-6.10048	1.0575e-09	2.80974e-08
MMP23B	31.3199	2.87974	45.5399	3.58444	0.504274	6.09954	1.06375e-09	2.8237e-08
FANCA	9.79618	1.1331	14.1277	2.82617	0.497451	6.09863	1.0698e-09	2.83709e-08
DDX11	46.2058	5.2075	66.7049	3.44718	0.348761	6.09791	1.07464e-09	2.84724e-08
AC131097.2	4.79123	11.9532	1.21027	-2.55101	0.825391	-6.09723	1.07922e-09	2.85668e-08
SMARCC1	28.4607	7.76571	38.8083	2.18313	0.205999	6.09588	1.08835e-09	2.87815e-08
CDCA5	5.43756	0.360484	7.9761	2.72197	0.558961	6.0954	1.09163e-09	2.88411e-08
POLR2A	57.2816	14.3249	78.76	2.37979	0.198482	6.09503	1.09417e-09	2.88811e-08
CLSTN3	54.5794	6.30662	78.7158	3.44759	0.451178	6.09469	1.0965e-09	2.89156e-08
HMGA2	54.7989	0.585528	81.9056	5.70843	1.11766	6.09434	1.09893e-09	2.89524e-08
MYLK2	49.337	146.421	0.794882	-6.35991	1.51645	-6.09275	1.10989e-09	2.92139e-08
ARPP19	51.2806	59.6014	47.1202	-0.332709	0.185904	-6.09201	1.11505e-09	2.93223e-08
CAP2	38.5353	85.8549	14.8755	-2.45181	0.723859	-6.08868	1.13843e-09	2.99092e-08
CDC42EP5	24.1653	1.43333e-05	36.2479	5.21907	1.46133	6.08789	1.1441e-09	3.00301e-08
AC010970.1	11297.4	18873.1	7509.53	-1.32942	0.411514	-6.08336	1.17687e-09	3.08616e-08
NXF2B	3.72127	0	5.5819	2.7185	3.43473	6.08261	1.18243e-09	3.09787e-08
RAP1GAP	6.93451	0.216094	10.2937	3.21519	0.825357	6.07513	1.23891e-09	3.24009e-08
KPNA4	14.784	22.5463	10.9029	-0.984191	0.438111	-6.07511	1.23902e-09	3.24009e-08
FAM83D	4.08989	0.176119	6.04677	2.58293	0.663641	6.07198	1.26342e-09	3.30083e-08
POMC	0.89277	2.04572	0.316296	-1.2103	0.707443	-6.07173	1.26541e-09	3.30296e-08
LHX1	4.68038	0.00236833	7.01939	3.00008	1.33888	6.07112	1.2702e-09	3.31239e-08
LRCH2	5.69252	0.673441	8.20206	2.45914	0.410847	6.06923	1.28528e-09	3.34862e-08
TPRG1	4.65105	11.0137	1.46972	-2.28226	0.780772	-6.06691	1.30394e-09	3.39409e-08
KMT5C	30.9776	5.72504	43.6039	2.72956	0.239731	6.06578	1.31311e-09	3.41482e-08
NAMPT	20.4985	26.3841	17.5557	-0.561472	0.298449	-6.06415	1.32653e-09	3.44653e-08
UBR3	21.9025	36.7361	14.4857	-1.28501	0.495988	-6.06162	1.3476e-09	3.49579e-08
HSPA1A	0.212011	0.636034	0	-0.710203	1.40204	-6.06157	1.34797e-09	3.49579e-08
MRPL24	75.0982	68.0157	78.6394	0.206559	0.210906	-6.05843	1.3746e-09	3.55865e-08
IP6K2	128.782	30.9705	177.688	2.48262	0.205946	6.05841	1.37474e-09	3.55865e-08
NONO	224.51	52.3949	310.567	2.54477	0.193622	6.05723	1.38487e-09	3.58157e-08
KLHL35	9.34063	0.380512	13.8207	3.42434	0.585319	6.05694	1.38733e-09	3.58467e-08
NDUFV3	16.1701	18.3239	15.0933	-0.263929	0.312019	-6.05499	1.40425e-09	3.62505e-08
FBN2	25.9092	0.318812	38.7043	4.91199	1.05012	6.05278	1.42368e-09	3.66929e-08
PAGR1	50.6012	9.42437	71.1897	2.79183	0.258373	6.05274	1.42399e-09	3.66929e-08
TNRC18	55.0809	14.0518	75.5954	2.34732	0.215596	6.05191	1.43139e-09	3.68497e-08
SMPD5	5.42339	0.173973	8.0481	2.94622	0.696872	6.04776	1.46877e-09	3.77775e-08
BIRC3	1.9879	1.76964	2.09703	0.161185	0.398168	-6.04277	1.51491e-09	3.89286e-08
APOB	0.306144	0.770758	0.0738365	-0.721593	0.853502	-6.04139	1.52795e-09	3.92281e-08
ARHGAP11A	4.7704	0.540017	6.88559	2.35627	0.511412	6.03984	1.54263e-09	3.95378e-08
TRIM54	60.886	181.59	0.533776	-6.89538	1.59472	-6.03982	1.54282e-09	3.95378e-08
SLC9A2	0.531529	1.53128	0.0316542	-1.29491	1.16002	-6.03902	1.55055e-09	3.96997e-08
PPAT	12.1431	3.1389	16.6452	2.09195	0.267708	6.03659	1.57407e-09	4.02467e-08
LGR6	38.151	1.46706	56.493	4.54252	0.719469	6.03652	1.57477e-09	4.02467e-08
SIK2	11.3063	22.9161	5.50138	-1.87917	0.502553	-6.03617	1.57816e-09	4.02968e-08
S100A13	82.1269	139.97	53.2054	-1.37888	0.379323	-6.03567	1.58308e-09	4.03859e-08
LPIN1	18.2031	25.8378	14.3857	-0.802675	0.444405	-6.03503	1.58934e-09	4.05087e-08
SQLE	29.1343	1.51771	42.9426	4.12544	0.569644	6.03483	1.59132e-09	4.05224e-08
UNC5A	10.3691	0.0498647	15.5288	3.9767	1.15079	6.03353	1.60415e-09	4.08124e-08
HMCES	22.2362	23.4437	21.6325	-0.111067	0.238518	-6.03327	1.60678e-09	4.08331e-08
IL24	0.727619	2.06123	0.0608113	-1.52894	0.989958	-6.03316	1.60786e-09	4.08331e-08
SFPQ	325.438	75.3847	450.465	2.56326	0.238134	6.03274	1.61205e-09	4.09024e-08
SCUBE1	15.1976	0.651565	22.4706	3.82895	0.739149	6.03227	1.61668e-09	4.09831e-08
CECR7	19.7222	3.82517	27.6708	2.57093	0.25211	6.03074	1.63214e-09	4.13378e-08
ALDH3A2	43.6324	59.263	35.8171	-0.710896	0.313105	-6.03055	1.634e-09	4.13476e-08
CS	104.484	149.636	81.9078	-0.861485	0.426534	-6.0293	1.64672e-09	4.16321e-08
RIPOR2	2.60893	5.73164	1.04758	-1.71704	0.636132	-6.02853	1.6546e-09	4.17939e-08
RECQL4	15.2333	1.96172	21.8691	2.94889	0.426232	6.02622	1.67837e-09	4.23287e-08
ACOT6	1.04736	2.21245	0.464819	-1.13295	0.577328	-6.02618	1.67878e-09	4.23287e-08
AUH	12.5329	13.04	12.2793	-0.0803612	0.244904	-6.0259	1.68166e-09	4.23634e-08
CEACAM1	1.3746	1.58367	1.27006	-0.186691	0.377408	-6.02533	1.68762e-09	4.24755e-08
TCEAL7	48.5541	3.18427	71.239	4.10973	0.451222	6.02423	1.69917e-09	4.27281e-08
C19orf70	60.6558	64.8486	58.5594	-0.144822	0.294277	-6.02136	1.72959e-09	4.34541e-08
MTMR14	16.6132	15.3427	17.2485	0.159128	0.20294	-6.02051	1.73868e-09	4.36437e-08
MYL12A	610.46	1227.57	301.908	-2.02002	0.618958	-6.0195	1.74956e-09	4.38775e-08
DENND3	6.18577	7.85381	5.35175	-0.479143	0.477173	-6.01773	1.76878e-09	4.43203e-08
TEX9	12.2487	5.16071	15.7927	1.44666	0.202165	6.01745	1.77185e-09	4.43578e-08
FEM1A	18.758	45.7609	5.25659	-2.90185	0.80281	-6.01664	1.7807e-09	4.45397e-08
VGLL3	3.47714	6.59201	1.9197	-1.37866	0.761124	-6.01637	1.78373e-09	4.45759e-08
SEZ6L	8.62068	0.0717857	12.8951	3.69649	1.16209	6.01481	1.80103e-09	4.49682e-08
CTAG1B	129.392	0.28997	193.942	7.23957	1.41371	6.01292	1.82211e-09	4.54542e-08
PPEF2	17.3064	18.8551	16.532	-0.17952	0.724008	-6.01228	1.82934e-09	4.55944e-08
KSR2	0.504878	0.0169733	0.748831	0.782109	0.699006	6.0114	1.83925e-09	4.58007e-08
NDUFB4	171.735	248.8	133.203	-0.896357	0.414667	-6.00735	1.88582e-09	4.6919e-08
TUSC3	102.146	11.0946	147.671	3.61969	0.477328	6.0069	1.89107e-09	4.70081e-08
ZC4H2	13.6067	2.04605	19.387	2.74263	0.386733	6.00658	1.8948e-09	4.70592e-08
NDUFA7	62.8583	106.476	41.0492	-1.35387	0.516088	-6.00628	1.89826e-09	4.71035e-08
CYTH2	39.2174	13.5864	52.0329	1.86227	0.210031	6.00613	1.89999e-09	4.7105e-08
SYNPO2L	20.4851	51.4431	5.00603	-3.12627	1.12227	-6.00521	1.91082e-09	4.73319e-08
EIF5	91.4666	107.727	83.3363	-0.366489	0.28592	-6.0031	1.9358e-09	4.79084e-08
TIMELESS	9.79203	1.35817	14.009	2.67008	0.327252	5.99854	1.991e-09	4.92314e-08
TPPP3	37.942	77.084	18.3711	-2.01112	0.665313	-5.99827	1.99436e-09	4.92712e-08
GPAT3	4.27404	11.4636	0.679256	-2.89183	0.951506	-5.99751	2.00363e-09	4.94109e-08
UBE2QL1	2.76205	6.65391	0.816124	-2.07533	0.804005	-5.99745	2.00443e-09	4.94109e-08
MYCBPAP	26.9483	2.52981	39.1576	3.50801	0.384907	5.99738	2.00528e-09	4.94109e-08
TP53	54.4741	8.46654	77.4779	3.05138	0.374648	5.99024	2.09536e-09	5.15854e-08
CHCHD3	41.4663	60.1613	32.1189	-0.884964	0.423864	-5.98963	2.10317e-09	5.17325e-08
ISCA1	30.7027	34.9079	28.6001	-0.278695	0.303462	-5.98755	2.13031e-09	5.23544e-08
PDHX	24.0463	35.4353	18.3518	-0.912865	0.463916	-5.98739	2.13241e-09	5.23602e-08
NCOA4	63.025	69.0545	60.0103	-0.199425	0.241518	-5.98676	2.14063e-09	5.25164e-08
LRIG3	96.7132	7.66355	141.238	4.0372	0.561395	5.98637	2.14579e-09	5.25972e-08
NNT	40.1892	72.2175	24.1751	-1.54019	0.542928	-5.98437	2.17223e-09	5.31989e-08
IL32	44.6871	105.545	14.2582	-2.8038	0.754717	-5.984	2.1772e-09	5.32742e-08
ADCY9	5.23899	8.92432	3.39632	-1.17467	0.517563	-5.98159	2.20975e-09	5.40239e-08
NIPSNAP2	87.4662	162.607	49.8961	-1.6846	0.579198	-5.98091	2.2189e-09	5.42004e-08
SAMHD1	18.8691	26.0212	15.293	-0.729841	0.440036	-5.9802	2.22866e-09	5.43916e-08
IL6R	3.95805	7.17411	2.35002	-1.28689	0.613575	-5.97853	2.25155e-09	5.49028e-08
AMPD3	4.05888	7.73151	2.22256	-1.43803	0.77963	-5.97745	2.26652e-09	5.52199e-08
SSFA2	17.0611	22.9762	14.1035	-0.666718	0.350672	-5.97692	2.27394e-09	5.53529e-08
ATP5F1E	37.5369	36.944	37.8333	0.0334238	0.244363	-5.97674	2.27651e-09	5.53676e-08
ESPL1	3.63586	0.115586	5.396	2.51937	0.769833	5.97592	2.28795e-09	5.55979e-08
CDT1	4.52299	0.182054	6.69346	2.70234	0.673744	5.97521	2.298e-09	5.57938e-08
PRDX6	203.661	243.947	183.518	-0.408711	0.274224	-5.97482	2.30348e-09	5.58787e-08
DHRS7C	19.3869	57.8566	0.152059	-5.67492	1.6609	-5.97459	2.30666e-09	5.59077e-08
ACBD5	11.3461	10.8556	11.5914	0.0868608	0.219246	-5.97274	2.333e-09	5.64976e-08
KIF15	4.60109	0.389277	6.707	2.47184	0.533366	5.9723	2.33928e-09	5.66009e-08
USF2	100.454	85.5638	107.899	0.331154	0.202181	-5.97057	2.36424e-09	5.71558e-08
PARP15	1.71576	2.64479	1.25125	-0.695111	0.42418	-5.96853	2.39395e-09	5.77495e-08
SPARCL1	72.3175	148.481	34.236	-2.08484	0.648582	-5.96852	2.39418e-09	5.77495e-08
TGFBR2	20.9513	47.1288	7.8625	-2.44112	0.60339	-5.96847	2.39495e-09	5.77495e-08
BLVRB	45.6194	79.0476	28.9053	-1.42046	0.471605	-5.96422	2.45801e-09	5.92193e-08
SCAP	46.9873	14.7998	63.0811	2.01999	0.146529	5.96382	2.46411e-09	5.93157e-08
RIMBP2	9.23959	0.061329	13.8287	3.80445	0.944692	5.96216	2.48918e-09	5.9868e-08
NEK7	27.7157	43.828	19.6595	-1.1176	0.374799	-5.95853	2.54521e-09	6.11633e-08
RCAN1	14.0375	18.6832	11.7146	-0.630486	0.336055	-5.95832	2.54845e-09	6.11889e-08
P2RX6P	1.62015	4.69396	0.0832403	-2.39408	1.16116	-5.95733	2.56386e-09	6.1465e-08
KANK1	20.3921	30.9239	15.1262	-0.985225	0.416515	-5.9573	2.56432e-09	6.1465e-08
TRIB3	6.13262	0.474702	8.96158	2.75595	0.479815	5.95057	2.67206e-09	6.39487e-08
ZBTB38	11.498	15.5599	9.46702	-0.661845	0.338139	-5.95055	2.67248e-09	6.39487e-08
SLC28A1	0.491801	1.43881	0.0182983	-1.26001	1.43579	-5.94976	2.68531e-09	6.42012e-08
SRSF12	4.68386	0.476805	6.78738	2.39866	0.615437	5.94621	2.74414e-09	6.55522e-08
ASB10	4.89582	14.5352	0.0761283	-3.85162	1.57503	-5.94537	2.75832e-09	6.5835e-08
PSMD8	111.119	111.745	110.806	-0.0120714	0.2283	-5.94478	2.76828e-09	6.60168e-08
CHTF18	20.5172	3.1682	29.1917	2.85665	0.322056	5.94335	2.79256e-09	6.65395e-08
PMS2CL	9.91822	2.41182	13.6714	2.10439	0.241448	5.94268	2.80402e-09	6.67561e-08
PWWP2B	3.45495	6.5161	1.92438	-1.36185	0.507825	-5.93478	2.94245e-09	6.99925e-08
DPEP1	13.5855	0.106111	20.3252	4.26899	1.11461	5.93417	2.95335e-09	7.01926e-08
TRPV2	4.66026	8.85167	2.56456	-1.46664	0.564026	-5.93367	2.96234e-09	7.03469e-08
XPO5	22.6311	5.51924	31.187	2.3037	0.228262	5.93345	2.9664e-09	7.03838e-08
EFNA3	15.9427	0.794315	23.5169	3.77227	0.695472	5.93248	2.98398e-09	7.07414e-08
CAMK2D	17.119	21.7728	14.7921	-0.528107	0.334016	-5.93111	3.009e-09	7.12297e-08
NASP	102.631	25.8282	141.032	2.40439	0.206063	5.93107	3.00963e-09	7.12297e-08
HOOK1	5.13967	0.175665	7.62167	2.87449	0.652637	5.93064	3.01765e-09	7.13595e-08
SLC9A5	8.43188	1.88584	11.7049	2.13832	0.316821	5.92877	3.05219e-09	7.21158e-08
STX11	4.10628	11.9969	0.160952	-3.48479	1.16389	-5.92556	3.11239e-09	7.34764e-08
MYEF2	31.3165	4.93573	44.5069	2.93859	0.493833	5.92446	3.13317e-09	7.3905e-08
MYBL2	5.61827	0.224064	8.31537	2.92793	0.729156	5.92393	3.14328e-09	7.40815e-08
CDK10	90.9516	19.1447	126.855	2.66604	0.268251	5.92312	3.15886e-09	7.43864e-08
SDHC	95.92	114.85	86.4551	-0.405639	0.385491	-5.92121	3.1958e-09	7.51933e-08
SEMA7A	8.14781	0.615912	11.9138	2.99849	0.521618	5.92063	3.20705e-09	7.53952e-08
PDHB	47.2975	62.2146	39.8389	-0.630314	0.374651	-5.91962	3.22693e-09	7.57992e-08
QSOX2	7.81436	1.8048	10.8191	2.07515	0.23208	5.91804	3.25807e-09	7.6467e-08
CAV2	29.595	75.5454	6.61984	-3.32848	0.828612	-5.9175	3.2688e-09	7.66548e-08
MEF2C	48.496	105.055	20.2167	-2.32154	0.749743	-5.91653	3.28811e-09	7.70436e-08
MDK	307.319	20.13	450.913	4.41868	0.608858	5.91514	3.31589e-09	7.76298e-08
F3	12.8206	34.6713	1.89519	-3.62303	0.867934	-5.91443	3.33035e-09	7.79036e-08
UQCR11	111.89	156.295	89.6871	-0.794504	0.452179	-5.91426	3.33371e-09	7.79175e-08
B3GALNT1	21.3066	2.49178	30.7141	3.18309	0.455431	5.9136	3.3472e-09	7.81679e-08
NDRG2	208.774	378.092	124.114	-1.5993	0.61662	-5.91317	3.35578e-09	7.83034e-08
LRRN4CL	3.93844	10.1167	0.849331	-2.58765	0.735346	-5.91237	3.3722e-09	7.86215e-08
HNRNPA3	174.686	54.5457	234.756	2.08555	0.121068	5.91076	3.4054e-09	7.93298e-08
KCNAB1	2.99631	3.99541	2.49676	-0.514583	0.507047	-5.90875	3.44719e-09	8.0237e-08
ARHGEF6	12.9923	27.7046	5.63617	-2.11286	0.599096	-5.90708	3.48234e-09	8.09881e-08
HK2	11.6351	24.0271	5.43914	-1.95855	0.504457	-5.90647	3.49512e-09	8.12184e-08
ACOT1	8.31479	13.5448	5.6998	-1.11831	0.389397	-5.90562	3.51314e-09	8.15696e-08
TUBA8	14.4537	36.7408	3.31012	-3.13032	0.855764	-5.90527	3.52063e-09	8.16763e-08
BEX3	280.86	39.3966	401.592	3.31701	0.385217	5.90506	3.52513e-09	8.17133e-08
NDUFB3	65.1867	111.024	42.2682	-1.37242	0.554156	-5.90337	3.56151e-09	8.24887e-08
NT5DC1	6.77434	11.1468	4.58812	-1.12014	0.443261	-5.90284	3.57303e-09	8.26876e-08
MAP3K8	4.49632	9.35691	2.06603	-1.75615	0.544722	-5.9023	3.58467e-09	8.28888e-08
IL17D	26.8381	64.4678	8.02318	-2.85908	0.851345	-5.90032	3.62787e-09	8.3819e-08
HADHA	125.287	134.49	120.686	-0.155022	0.290801	-5.89979	3.63958e-09	8.40206e-08
RRAGD	11.3246	28.754	2.60984	-3.04307	0.83168	-5.89806	3.6781e-09	8.48402e-08
TCERG1L	14.2611	0.0478933	21.3677	4.41585	1.22269	5.89774	3.6851e-09	8.49321e-08
SYTL3	1.79686	3.85944	0.765572	-1.46065	0.623765	-5.89645	3.714e-09	8.55283e-08
RAB7A	100.743	97.9403	102.144	0.0600269	0.233099	-5.89459	3.75612e-09	8.64276e-08
PPP3CC	13.7487	19.91	10.6681	-0.841627	0.407983	-5.89425	3.7638e-09	8.65336e-08
ISYNA1	152.868	13.3952	222.605	3.95729	0.423832	5.8934	3.78325e-09	8.69097e-08
ST6GAL1	6.86458	7.32684	6.63345	-0.125435	0.337462	-5.88948	3.87409e-09	8.8924e-08
LIF	5.95054	0.211301	8.82015	3.01919	0.622188	5.88536	3.97195e-09	9.10962e-08
BIRC5	9.69821	0.569008	14.2628	3.2821	0.715207	5.88499	3.98077e-09	9.12242e-08
RMDN1	64.3414	48.7495	72.1374	0.555927	0.171081	-5.88308	4.02702e-09	9.2209e-08
DPT	93.4671	270.387	5.00708	-5.49754	1.09788	-5.88277	4.03462e-09	9.23079e-08
KLHL38	10.787	32.0997	0.130599	-4.87166	1.63142	-5.88183	4.05756e-09	9.27575e-08
DECR1	96.2117	100.192	94.2213	-0.0877452	0.252781	-5.88064	4.08694e-09	9.33532e-08
SCN3B	0.97789	1.82686	0.553408	-0.863762	0.650714	-5.88023	4.09698e-09	9.35067e-08
VSTM2B	11.9167	0.0491377	17.8505	4.16733	1.18996	5.87438	4.24418e-09	9.67879e-08
TREX1	4.95597	6.79218	4.03786	-0.629217	0.381362	-5.87344	4.26856e-09	9.7265e-08
NMRK2	18.1826	53.3315	0.608229	-5.07824	1.49842	-5.87307	4.2781e-09	9.74037e-08
ZGLP1	6.16504	0.816914	8.8391	2.43704	0.448416	5.87281	4.28472e-09	9.74757e-08
NPR1	7.07228	15.8102	2.70331	-2.18245	0.615086	-5.87257	4.291e-09	9.75397e-08
GFRA2	23.3789	0.924932	34.6058	4.20923	0.700202	5.87155	4.31736e-09	9.80599e-08
KCNA7	3.66833	9.56092	0.722033	-2.61655	0.937509	-5.87088	4.3348e-09	9.83765e-08
FRMPD3	1.83132	0.0282993	2.73283	1.86001	1.11856	5.87024	4.35168e-09	9.86802e-08
ADPRHL1	15.1727	41.1241	2.19703	-3.71984	0.990299	-5.86974	4.36477e-09	9.88973e-08
TRAK1	21.2871	40.3436	11.7589	-1.69616	0.481858	-5.86932	4.37591e-09	9.90701e-08
ARID1A	50.1699	10.4149	70.0475	2.63787	0.22936	5.86803	4.41011e-09	9.97642e-08
HECTD3	20.785	20.9849	20.6851	-0.0198131	0.227061	-5.86727	4.43039e-09	1.00142e-07
TCEAL5	13.9513	0.096949	20.8785	4.31794	1.03132	5.86199	4.5736e-09	1.03297e-07
BCL7B	28.1532	30.9013	26.7792	-0.199612	0.287166	-5.85826	4.67729e-09	1.05554e-07
TRDN	150.218	449.115	0.769816	-7.99055	1.76065	-5.85536	4.75981e-09	1.0733e-07
RASL11B	46.3451	2.54423	68.2455	4.28818	0.68157	5.8551	4.76737e-09	1.07415e-07
PPTC7	10.8925	18.0294	7.32413	-1.19286	0.472362	-5.85467	4.7797e-09	1.07606e-07
INTS3	62.8249	15.5986	86.438	2.3972	0.186729	5.85317	4.82295e-09	1.08493e-07
ZNF662	10.7254	4.21833	13.9789	1.52127	0.204735	5.85282	4.83307e-09	1.08634e-07
GLIPR2	8.92153	20.0033	3.38065	-2.2614	0.600609	-5.85177	4.8638e-09	1.09238e-07
PARP9	7.45464	8.81651	6.7737	-0.336607	0.309609	-5.85048	4.90152e-09	1.09997e-07
COL4A5	60.1077	4.39099	87.9661	4.04463	0.450729	5.84997	4.91652e-09	1.10246e-07
TMEM164	13.2796	14.9505	12.4442	-0.24662	0.313614	-5.84837	4.96423e-09	1.11227e-07
FH	34.4246	50.3476	26.4631	-0.902801	0.434782	-5.84602	5.03467e-09	1.12716e-07
ZNF608	55.656	5.12129	80.9233	3.74237	0.547854	5.84545	5.05191e-09	1.13012e-07
PKD1L2	2.40967	5.84955	0.68973	-2.01922	0.529917	-5.84293	5.12902e-09	1.14646e-07
ZBTB20	15.9461	11.0078	18.4153	0.693216	0.351134	-5.84099	5.18929e-09	1.15901e-07
MASP1	8.94212	17.0634	4.88148	-1.61882	0.746685	-5.83481	5.38509e-09	1.20179e-07
AC011498.4	3.97583	9.95475	0.986361	-2.46336	0.828223	-5.83366	5.42261e-09	1.2092e-07
KRBA1	11.3136	2.24617	15.8472	2.3757	0.244299	5.83333	5.43335e-09	1.21064e-07
PRKAR2A	14.1545	19.1222	11.6706	-0.667301	0.370871	-5.83118	5.50354e-09	1.22531e-07
LSMEM1	8.08114	17.2974	3.47302	-2.03232	0.854058	-5.82977	5.55038e-09	1.23476e-07
RTN4RL2	7.61121	0.936292	10.9487	2.62548	0.41746	5.8289	5.57936e-09	1.24023e-07
NDUFV2	116.861	182.791	83.8958	-1.1143	0.457775	-5.82715	5.63806e-09	1.25229e-07
SLN	399.352	1182.44	7.80852	-7.06987	1.59034	-5.82473	5.72048e-09	1.26959e-07
RAB21	29.7433	33.0586	28.0857	-0.227709	0.30771	-5.824	5.7454e-09	1.27412e-07
DLX1	16.9772	0	25.4658	4.72606	1.65139	5.82137	5.83682e-09	1.29338e-07
FAR2P1	68.2119	0.392427	102.122	6.2106	1.14009	5.81775	5.96456e-09	1.32064e-07
SCAMP5	28.2516	1.77438	41.4903	3.9369	0.62756	5.81736	5.97827e-09	1.32264e-07
GLB1L2	10.9971	0.507867	16.2418	3.51533	0.626513	5.81682	5.99786e-09	1.32593e-07
FAM111B	3.46673	0.53695	4.93162	1.94836	0.324517	5.81224	6.16433e-09	1.36167e-07
FGR	3.04604	7.8365	0.650809	-2.4203	0.765909	-5.81123	6.20152e-09	1.36881e-07
AGRN	71.1086	5.55592	103.885	3.99986	0.4912	5.80961	6.26191e-09	1.38105e-07
CRTC1	14.2908	3.00127	19.9356	2.38743	0.202289	5.80584	6.40433e-09	1.41136e-07
LIMS2	14.5422	26.883	8.37182	-1.57298	0.573871	-5.80544	6.41964e-09	1.41363e-07
MSTO2P	5.30258	0.708569	7.59959	2.33148	0.370732	5.80392	6.47813e-09	1.42539e-07
TFEB	10.1267	16.2441	7.06805	-1.09581	0.545285	-5.80323	6.50494e-09	1.43017e-07
CACNA2D1	11.8937	30.8722	2.40451	-3.22678	0.912739	-5.80051	6.61126e-09	1.45242e-07
TTC7B	16.8236	21.4874	14.4917	-0.537618	0.221005	-5.79982	6.6388e-09	1.45733e-07
TRAM1L1	6.57151	0.520866	9.59684	2.80067	0.530036	5.79742	6.73426e-09	1.47713e-07
CUL9	26.9559	6.79447	37.0367	2.28687	0.195908	5.79568	6.80453e-09	1.49138e-07
ZHX3	6.92889	6.72105	7.03281	0.0571086	0.247092	-5.79345	6.89534e-09	1.51011e-07
SHISA7	5.61624	0.0617717	8.39347	3.14519	1.06258	5.79228	6.94359e-09	1.5195e-07
DEPTOR	10.3916	22.4754	4.34975	-2.13361	0.684558	-5.79131	6.98406e-09	1.52717e-07
NRBF2	11.9869	11.35	12.3053	0.107482	0.194256	-5.79056	7.01527e-09	1.5328e-07
PLA2G15	11.4776	11.1656	11.6336	0.0544673	0.282578	-5.78575	7.21916e-09	1.57613e-07
RCC2	34.1918	5.85484	48.3603	2.84816	0.351568	5.78409	7.29051e-09	1.58924e-07
ADAMTS6	5.96817	0.327448	8.78853	2.88244	0.615692	5.78409	7.29052e-09	1.58924e-07
ZNF709	2.65899	0.284885	3.84604	1.91517	0.477598	5.78258	7.35657e-09	1.6024e-07
SHROOM2	1.66406	0.144002	2.42408	1.58163	0.512636	5.77667	7.61931e-09	1.65835e-07
FLRT1	6.64303	0.138487	9.8953	3.25852	0.847447	5.77646	7.62888e-09	1.65915e-07
HMGB3	21.3738	5.05251	29.5345	2.33483	0.29854	5.77525	7.68373e-09	1.66979e-07
NLRP2	0.826768	0	1.24015	1.1636	3.43528	5.77381	7.74969e-09	1.68283e-07
RAPGEF1	24.208	35.043	18.7904	-0.864915	0.339445	-5.77356	7.76153e-09	1.6841e-07
NDUFA6	25.0547	33.9115	20.6263	-0.690918	0.414994	-5.77227	7.82106e-09	1.69571e-07
NDUFS1	40.4642	76.3545	22.519	-1.71766	0.504732	-5.77184	7.84084e-09	1.69869e-07
SOSTDC1	26.2141	0.252901	39.1947	5.00366	1.17018	5.76559	8.13744e-09	1.76159e-07
FZD10	34.6027	0.506219	51.6509	5.12745	0.848901	5.76506	8.16282e-09	1.76573e-07
RCCD1	15.6697	3.21684	21.8961	2.44087	0.268401	5.76253	8.28632e-09	1.79107e-07
ZCCHC3	17.7748	4.39053	24.4669	2.24013	0.217767	5.76153	8.33542e-09	1.79977e-07
ATAD2	10.5241	1.75767	14.9074	2.52817	0.389439	5.76145	8.33939e-09	1.79977e-07
WNK1	59.1827	36.4716	70.5383	0.93292	0.248085	-5.75758	8.53307e-09	1.84016e-07
FNIP2	8.63616	9.49761	8.20544	-0.189503	0.276768	-5.75533	8.64742e-09	1.86205e-07
PSEN2	10.9188	15.7185	8.519	-0.812564	0.382348	-5.75532	8.64776e-09	1.86205e-07
RNF2	11.7311	2.78632	16.2034	2.18383	0.234455	5.75301	8.76672e-09	1.88622e-07
SLC36A2	4.58802	12.4499	0.65708	-3.02088	1.03925	-5.75022	8.91278e-09	1.91618e-07
SRPK2	36.7384	12.4538	48.8807	1.89046	0.188862	5.7477	9.04645e-09	1.94343e-07
OGDH	47.51	77.9086	32.3108	-1.24419	0.516491	-5.74676	9.09711e-09	1.95283e-07
TMPO	38.4022	7.85555	53.6755	2.62624	0.286249	5.74527	9.17744e-09	1.96857e-07
COX7B	63.7389	81.9252	54.6457	-0.575539	0.506167	-5.74489	9.19802e-09	1.97148e-07
TMSB15B	2.64222	0.21513	3.85576	1.99859	0.503793	5.74355	9.27102e-09	1.98562e-07
ECI2	47.1998	70.3454	35.6271	-0.96191	0.41565	-5.74081	9.42221e-09	2.01647e-07
DUOX1	16.307	1.53656	23.6922	3.28311	0.611405	5.73912	9.51699e-09	2.0352e-07
MCU	14.8311	24.0837	10.2048	-1.16263	0.531079	-5.73897	9.52525e-09	2.03543e-07
LRRC14	17.8195	5.4674	23.9956	1.95041	0.188898	5.73715	9.62802e-09	2.05583e-07
MAST1	8.24575	0.357922	12.1897	3.27993	0.793467	5.73655	9.6622e-09	2.06156e-07
ARL6IP5	77.1672	104.821	63.3402	-0.717833	0.363156	-5.73613	9.68626e-09	2.06513e-07
CLCN2	5.78672	1.35716	8.0015	1.93311	0.301793	5.73593	9.69791e-09	2.06605e-07
ACAA2	53.8791	88.1019	36.7678	-1.2383	0.43373	-5.73534	9.73186e-09	2.07172e-07
PTPRB	3.81746	8.11664	1.66788	-1.77281	0.645591	-5.73518	9.74085e-09	2.07206e-07
PLK1	8.60832	0.950348	12.4373	2.78444	0.430777	5.73179	9.93762e-09	2.11233e-07
LMO2	12.6543	17.548	10.2074	-0.726809	0.361369	-5.72942	1.00773e-08	2.14039e-07
FSD1	10.9028	0.0725517	16.3179	4.01314	1.10478	5.72911	1.00959e-08	2.14273e-07
UQCR10	114.251	186.431	78.1619	-1.24348	0.54871	-5.72732	1.02032e-08	2.16389e-07
MED17	17.7709	5.09884	24.1069	2.04148	0.17788	5.72488	1.0351e-08	2.19356e-07
TRIM22	9.18305	15.7609	5.89414	-1.28166	0.590251	-5.72393	1.0409e-08	2.20421e-07
FAM163B	12.9848	0.315108	19.3196	3.94962	0.897515	5.72144	1.05624e-08	2.235e-07
RPL3P2	2.08628	0	3.12942	2.04594	3.42899	5.72015	1.06433e-08	2.25043e-07
ACADM	58.4102	85.2752	44.9778	-0.908009	0.492735	-5.71891	1.07212e-08	2.2652e-07
PRR34	0.735831	1.60412	0.301685	-1.00042	0.72624	-5.71832	1.07585e-08	2.27137e-07
MST1	22.8506	4.57758	31.987	2.56419	0.272597	5.71702	1.08411e-08	2.2871e-07
REEP1	2.63691	5.78229	1.06421	-1.71618	0.705338	-5.71653	1.08724e-08	2.29198e-07
ACO2	85.5885	132.531	62.1174	-1.08106	0.51255	-5.71488	1.09779e-08	2.31251e-07
STIM1	27.8169	34.5785	24.4361	-0.484129	0.386347	-5.7127	1.11195e-08	2.34057e-07
PRR7	15.5421	0.680622	22.9728	3.83433	0.634814	5.70934	1.13417e-08	2.38557e-07
OSGIN1	4.56148	9.80617	1.93914	-1.87839	0.724941	-5.70503	1.16322e-08	2.44484e-07
FGF18	44.0567	1.2341	65.468	4.89489	0.770054	5.70359	1.17308e-08	2.46374e-07
MEGF6	82.5103	5.98928	120.771	4.12288	0.55888	5.70345	1.17404e-08	2.46391e-07
FHL2	14.0832	27.0409	7.60436	-1.70439	0.636228	-5.70299	1.17724e-08	2.46743e-07
CITED4	4.91768	9.20756	2.77274	-1.43595	0.560886	-5.70296	1.17747e-08	2.46743e-07
TTC26	4.8659	0.890583	6.85356	2.05452	0.291004	5.69946	1.2019e-08	2.51675e-07
PERM1	17.4267	48.4276	1.9262	-4.07822	1.23322	-5.69843	1.20918e-08	2.53012e-07
MED4	35.8541	32.7555	37.4034	0.186111	0.149663	-5.69769	1.21439e-08	2.53814e-07
CEP164	27.2356	7.41727	37.1448	2.18006	0.249552	5.69763	1.21482e-08	2.53814e-07
PSD2	1.41498	0.0339667	2.10549	1.58663	0.751349	5.69715	1.21828e-08	2.54348e-07
GREB1L	1.28429	2.43961	0.706621	-1.0111	0.627165	-5.69636	1.22393e-08	2.55339e-07
VHL	33.6112	8.59963	46.117	2.2952	0.200234	5.69492	1.23428e-08	2.57307e-07
FBXO32	33.4937	84.1673	8.15692	-3.21737	0.940713	-5.69404	1.2407e-08	2.58455e-07
NUBP1	18.8914	17.0355	19.8194	0.207085	0.225577	-5.69214	1.25458e-08	2.61152e-07
DIAPH3	2.11896	0.123106	3.11688	1.87406	0.642443	5.69166	1.25812e-08	2.61697e-07
SERPINA5	1.90328	5.35268	0.178579	-2.43032	1.16121	-5.68852	1.28143e-08	2.66347e-07
MRPL39	13.6671	15.6325	12.6845	-0.281464	0.309836	-5.68763	1.28816e-08	2.6755e-07
CHD1L	28.9014	7.77741	39.4635	2.20475	0.17277	5.68746	1.28944e-08	2.67617e-07
MCTP2	56.6194	0.229216	84.8145	6.12541	1.15945	5.68671	1.29508e-08	2.68592e-07
ATP13A1	42.7284	10.9754	58.6049	2.31536	0.261067	5.68587	1.30145e-08	2.69713e-07
UCP3	14.3572	36.6916	3.19003	-3.16921	0.938807	-5.68344	1.32011e-08	2.73379e-07
HK1	27.798	35.2348	24.0796	-0.530863	0.361902	-5.68018	1.34554e-08	2.78441e-07
PTGDR	0.278483	0.799577	0.0179363	-0.822011	1.11189	-5.67923	1.35304e-08	2.79787e-07
CCDC74B	6.22616	0.44442	9.11703	2.80822	0.525337	5.6785	1.35881e-08	2.80773e-07
METTL7A	26.7163	67.0067	6.57108	-3.16711	0.779224	-5.67722	1.36905e-08	2.82683e-07
CXCL9	0.48372	1.39338	0.0288882	-1.21796	1.13475	-5.67641	1.37553e-08	2.83625e-07
DNMBP	4.34623	5.06829	3.9852	-0.283638	0.308531	-5.6764	1.37563e-08	2.83625e-07
TMEM106C	84.2992	14.3278	119.285	2.97223	0.278451	5.6762	1.37721e-08	2.83743e-07
CYP27A1	8.5626	17.7021	3.99285	-1.90527	0.571256	-5.67579	1.38051e-08	2.84216e-07
FANCI	7.57075	1.67256	10.5198	2.10783	0.505083	5.6755	1.38281e-08	2.84481e-07
ARHGAP10	11.8958	16.7657	9.46077	-0.764108	0.361687	-5.67463	1.38987e-08	2.85724e-07
GAD1	9.71671	0.0365343	14.5568	3.9077	1.03104	5.672	1.41144e-08	2.89947e-07
KDM4A	21.334	5.28458	29.3587	2.27222	0.226236	5.6703	1.42551e-08	2.92624e-07
HSD11B1	7.76284	23.0764	0.106069	-4.44411	1.57215	-5.66993	1.42853e-08	2.93031e-07
SNAI3	3.24495	8.0188	0.858022	-2.27917	0.882217	-5.66852	1.44037e-08	2.95245e-07
OSBPL9	38.5743	31.7324	41.9952	0.393455	0.202369	-5.66733	1.45042e-08	2.97088e-07
KIAA0232	8.08985	10.1187	7.07543	-0.461377	0.386744	-5.66473	1.47256e-08	3.01404e-07
BX255925.3	11.2862	2.17152	15.8436	2.40895	0.318592	5.66217	1.49466e-08	3.05706e-07
NDUFAF3	44.6853	48.4716	42.7921	-0.175927	0.258409	-5.66156	1.49999e-08	3.06572e-07
MOV10	47.7593	12.4159	65.431	2.30791	0.251057	5.66144	1.50111e-08	3.06579e-07
MFN2	42.4274	75.5178	25.8822	-1.50914	0.509425	-5.66005	1.51326e-08	3.08837e-07
APOPT1	37.7135	49.3453	31.8977	-0.61387	0.355491	-5.65981	1.51539e-08	3.09047e-07
AOC3	58.9055	166.187	5.2647	-4.73807	1.04971	-5.65842	1.52774e-08	3.11341e-07
CLUHP3	7.70686	1.21017	10.9552	2.43541	0.304336	5.65825	1.5292e-08	3.11413e-07
ST3GAL6	7.24011	11.1524	5.28395	-0.9515	0.554931	-5.65749	1.536e-08	3.12572e-07
XPO4	9.43633	18.5053	4.90187	-1.72462	0.660364	-5.65707	1.53981e-08	3.13121e-07
SGCA	52.0664	145.323	5.43825	-4.50634	1.29023	-5.65558	1.55321e-08	3.15618e-07
SCGB1D2	2.79982	8.39945	0	-3.23258	1.642	-5.65457	1.56241e-08	3.17259e-07
CNGA1	0.789765	1.46158	0.453856	-0.759701	0.534397	-5.65176	1.58817e-08	3.22257e-07
SBDS	90.1869	127.021	71.7698	-0.814969	0.409842	-5.65158	1.58982e-08	3.22358e-07
CCR1	1.95928	5.57799	0.149928	-2.5161	1.08828	-5.64791	1.62413e-08	3.2908e-07
MFSD6	5.72532	5.73638	5.71979	-0.00355666	0.418189	-5.64766	1.62642e-08	3.29306e-07
ASIC2	4.30086	0.340042	6.28126	2.44191	0.755898	5.64726	1.63022e-08	3.29839e-07
BLCAP	69.3736	84.0121	62.0544	-0.431071	0.336131	-5.64602	1.64204e-08	3.31992e-07
DHRS4	24.1135	22.7766	24.7819	0.116817	0.222388	-5.64381	1.66328e-08	3.36044e-07
TPST2	8.75433	12.9912	6.63591	-0.873643	0.3661	-5.64362	1.66511e-08	3.36174e-07
IL17RD	11.6453	0.745461	17.0953	3.37393	0.560737	5.63887	1.71165e-08	3.45232e-07
DMTN	10.6937	24.4851	3.798	-2.40915	0.728331	-5.6388	1.71243e-08	3.45232e-07
GABRQ	1.62481	0.00519667	2.43462	1.77267	1.26532	5.63737	1.72668e-08	3.47855e-07
RASEF	4.42353	0.525832	6.37238	2.27253	0.543931	5.63397	1.76104e-08	3.54524e-07
ASAH1	112.823	195.458	71.505	-1.43807	0.459138	-5.62744	1.82899e-08	3.67939e-07
CSRNP3	2.62933	0.187681	3.85015	2.02988	0.577693	5.62732	1.83029e-08	3.67939e-07
GIMAP6	6.32489	13.0837	2.94548	-1.83575	0.68869	-5.62697	1.83402e-08	3.68426e-07
PRKCI	21.7091	4.37308	30.3771	2.54589	0.235085	5.62508	1.85423e-08	3.72221e-07
TMEM130	8.07705	0.46327	11.8839	3.13831	0.843521	5.62479	1.85731e-08	3.72574e-07
SPHK2	15.9178	4.03989	21.8568	2.18116	0.22015	5.62375	1.86853e-08	3.74557e-07
LRRC4B	24.8757	0.285315	37.1709	4.89228	0.902254	5.62203	1.8873e-08	3.78051e-07
IRAK2	1.16409	2.46144	0.515412	-1.19166	0.620114	-5.61954	1.91464e-08	3.83254e-07
NDUFS5	249.529	301.416	223.585	-0.429273	0.335181	-5.61868	1.92424e-08	3.84904e-07
CIC	47.6395	13.2273	64.8456	2.21042	0.165586	5.61557	1.95915e-08	3.91607e-07
PGR	0.165608	0.483642	0.00659167	-0.559664	1.24614	-5.61473	1.96875e-08	3.93247e-07
FKBP11	29.5306	4.36838	42.1117	3.00552	0.477598	5.61425	1.97421e-08	3.94059e-07
TMEM38A	29.4986	74.8694	6.81324	-3.27953	1.00536	-5.61316	1.98667e-08	3.96264e-07
ARHGEF7	26.9762	27.5565	26.686	-0.044663	0.236938	-5.61254	1.99375e-08	3.97396e-07
CA13	8.57556	0.497072	12.6148	3.18496	0.514005	5.6117	2.00345e-08	3.99047e-07
BLM	2.79412	0.156033	4.11317	2.14503	0.537987	5.61129	2.00822e-08	3.99588e-07
BAHCC1	18.6436	4.17368	25.8785	2.37719	0.243074	5.61122	2.00901e-08	3.99588e-07
TNNT1	2387.68	6838.52	162.261	-5.38864	1.35608	-5.60987	2.02474e-08	4.02434e-07
PCDHB10	9.9071	0.635102	14.5431	3.24882	0.615745	5.60967	2.02708e-08	4.02615e-07
P2RY2	2.38999	6.79352	0.188232	-2.71346	1.20585	-5.60891	2.03604e-08	4.04109e-07
RNF128	1.1185	2.5528	0.401341	-1.34215	0.767719	-5.60683	2.06063e-08	4.08701e-07
LSM10	30.1048	40.637	24.8386	-0.688336	0.408395	-5.60588	2.07195e-08	4.10657e-07
CTSG	2.07659	6.13661	0.0465783	-2.76956	1.3922	-5.60319	2.10442e-08	4.168e-07
ENSA	75.3038	74.3453	75.7831	0.0272726	0.28229	-5.60195	2.11949e-08	4.19489e-07
SAP18	84.3312	67.2344	92.8796	0.460312	0.213453	-5.60055	2.13678e-08	4.22615e-07
FBXL3	22.4566	20.6052	23.3823	0.174457	0.178225	-5.59864	2.1604e-08	4.26986e-07
OR51E1	0.365735	0.85704	0.120082	-0.7294	0.828557	-5.59728	2.17745e-08	4.30054e-07
ABRA	8.2115	24.1068	0.263844	-4.31219	1.43582	-5.59657	2.18634e-08	4.31506e-07
CSTF3	45.0704	14.1082	60.5515	2.02646	0.176091	5.59584	2.19559e-08	4.33029e-07
ARHGEF9	25.9498	4.36266	36.7433	2.8152	0.276218	5.59303	2.23136e-08	4.39775e-07
MRPS15	59.5481	72.4985	53.0729	-0.442811	0.332846	-5.5912	2.2551e-08	4.44144e-07
KLHDC8B	27.918	34.6904	24.5318	-0.483239	0.34791	-5.59008	2.26967e-08	4.46702e-07
NDUFA4	106.926	148.849	85.9646	-0.785008	0.488252	-5.58721	2.30743e-08	4.53815e-07
LUM	74.8382	209.544	7.48531	-4.63301	1.05205	-5.58564	2.3284e-08	4.5762e-07
ZNF284	2.80428	0.493847	3.9595	1.73116	0.297665	5.58329	2.36009e-08	4.63526e-07
THOC7	49.1986	49.3438	49.126	-0.00625548	0.238941	-5.58238	2.37247e-08	4.65632e-07
CPPED1	4.09925	7.15568	2.57103	-1.19146	0.432576	-5.58114	2.3895e-08	4.68647e-07
PPARGC1A	2.82605	5.43634	1.5209	-1.3523	0.713226	-5.57733	2.44239e-08	4.78687e-07
NDUFA1	101.177	145.617	78.9569	-0.874761	0.466506	-5.57669	2.45143e-08	4.80126e-07
ZNF580	48.4694	11.0812	67.1634	2.49624	0.265118	5.57619	2.45838e-08	4.81152e-07
LILRB5	1.30294	3.2329	0.337965	-1.66161	0.750272	-5.57243	2.51212e-08	4.91329e-07
SHISA4	48.8517	125.22	10.6677	-3.43534	0.943612	-5.5687	2.56649e-08	5.01614e-07
DUSP9	5.3354	0.0200613	7.99307	3.14016	1.28218	5.56823	2.5734e-08	5.02616e-07
CD209	1.2631	3.07826	0.355515	-1.58911	0.724176	-5.56453	2.62863e-08	5.13048e-07
CRLS1	44.425	39.2632	47.0059	0.253753	0.187417	-5.562	2.66707e-08	5.2019e-07
ROR2	8.05405	0.366262	11.8979	3.23883	0.662267	5.55991	2.69914e-08	5.2608e-07
CNIH2	9.29347	0.478119	13.7012	3.3141	0.773356	5.55838	2.72288e-08	5.3034e-07
PALM3	7.33518	0.0797683	10.9629	3.46977	0.960927	5.55619	2.7573e-08	5.36673e-07
ARMT1	8.933	9.90722	8.44589	-0.207525	0.266072	-5.55569	2.76514e-08	5.37828e-07
IQCN	19.2368	1.88854	27.9109	3.3232	0.521411	5.55491	2.7776e-08	5.39878e-07
PUS7L	3.92172	1.00191	5.38162	1.67255	0.221465	5.55228	2.81966e-08	5.47675e-07
MRPS10	18.1085	19.7101	17.3077	-0.177889	0.303744	-5.54954	2.86422e-08	5.55948e-07
TRIM69	8.22361	10.2239	7.22349	-0.448747	0.334312	-5.54815	2.88716e-08	5.59761e-07
ATPAF1	38.6601	55.4255	30.2774	-0.851227	0.406711	-5.5481	2.88784e-08	5.59761e-07
DNAJA4	30.4018	53.0686	19.0684	-1.42987	0.628453	-5.54434	2.95067e-08	5.71546e-07
MID2	2.99874	5.062	1.96711	-1.03074	0.478206	-5.53953	3.03277e-08	5.87044e-07
BRD7	30.053	22.8422	33.6584	0.539687	0.145416	-5.53925	3.03768e-08	5.87591e-07
FGFR3	39.8288	2.41258	58.5369	4.12485	0.656997	5.53801	3.05923e-08	5.91354e-07
GMPR	20.7991	55.2006	3.59832	-3.61141	1.05721	-5.53786	3.06195e-08	5.91473e-07
SNX25	2.00119	3.20488	1.39934	-0.809425	0.425061	-5.53467	3.11809e-08	6.01905e-07
GNG5	95.6316	108.105	89.3949	-0.271405	0.375682	-5.53376	3.13443e-08	6.04302e-07
BEST3	4.93368	12.3732	1.21392	-2.59467	1.01062	-5.53374	3.1348e-08	6.04302e-07
AMMECR1	8.42703	0.909657	12.1857	2.78759	0.454442	5.53332	3.14224e-08	6.05322e-07
DLL3	2.46836	0.0996813	3.6527	2.08098	0.737488	5.52691	3.25921e-08	6.27427e-07
PAIP2B	10.6595	24.1313	3.92366	-2.35168	0.787159	-5.52557	3.28423e-08	6.31811e-07
CD3E	0.572178	1.48577	0.115379	-1.15616	0.964745	-5.52505	3.29398e-08	6.33254e-07
SEC16B	3.42834	3.95964	3.16269	-0.25272	0.432437	-5.52373	3.31886e-08	6.37602e-07
PRDX3	104.244	123.905	94.4129	-0.38858	0.343353	-5.52329	3.32707e-08	6.38744e-07
PADI2	25.9239	64.3598	6.70594	-3.08436	0.94784	-5.52191	3.35335e-08	6.43349e-07
PCBD1	40.6555	51.8798	35.0433	-0.552985	0.35387	-5.52179	3.3557e-08	6.43362e-07
KIF5A	5.19269	0.066674	7.7557	3.0371	0.97797	5.52147	3.36184e-08	6.44102e-07
ASPHD2	2.13801	0.23708	3.08847	1.72462	0.461919	5.52106	3.36963e-08	6.45155e-07
TSPY26P	5.41122	0.937836	7.64792	2.15791	0.283746	5.52043	3.38176e-08	6.47038e-07
FBXL21	6.57475	0.045907	9.83917	3.37343	1.12063	5.52003	3.38943e-08	6.48065e-07
CNTNAP3B	2.35131	4.47799	1.28796	-1.25958	0.451011	-5.51728	3.4428e-08	6.57823e-07
PCGF2	39.7804	6.89332	56.2239	2.85791	0.297483	5.51583	3.4713e-08	6.62819e-07
ASF1B	7.54131	0.509324	11.0573	2.99793	0.692367	5.5118	3.55192e-08	6.77476e-07
MYO19	41.0727	7.46154	57.8782	2.79874	0.257926	5.51175	3.55288e-08	6.77476e-07
SKA3	2.9601	0.128468	4.37592	2.25215	0.667835	5.5111	3.56591e-08	6.79501e-07
TRERF1	6.2557	1.07979	8.84366	2.24276	0.397734	5.50897	3.60935e-08	6.87314e-07
BAIAP2	52.1853	4.66162	75.9471	3.76458	0.575089	5.50863	3.61639e-08	6.88189e-07
EFNA2	15.2596	0	22.8894	4.5783	1.50043	5.50837	3.62178e-08	6.8875e-07
HIST3H2A	23.9623	1.33256	35.2772	3.95908	0.595561	5.50705	3.64897e-08	6.93101e-07
TNNT3	653.414	1880.9	39.6704	-5.53207	1.36347	-5.50702	3.64958e-08	6.93101e-07
UNC5B	32.5123	1.58524	47.9758	4.2437	0.655091	5.50675	3.65516e-08	6.93692e-07
COPS9	121.41	141.112	111.558	-0.336352	0.306976	-5.50662	3.65779e-08	6.93724e-07
DGKG	0.520086	1.11167	0.224294	-0.786436	0.680932	-5.50486	3.69464e-08	7.00241e-07
DDX1	62.4947	55.1034	66.1903	0.260166	0.24716	-5.50343	3.72479e-08	7.0548e-07
IARS2	35.2712	33.3336	36.24	0.11723	0.229734	-5.50247	3.74507e-08	7.08844e-07
CKAP2L	2.29092	0.135898	3.36843	1.94328	0.751789	5.50197	3.75561e-08	7.10362e-07
SLC25A26	15.6078	16.7698	15.0268	-0.148936	0.227852	-5.50042	3.78883e-08	7.16164e-07
CNTN2	3.5346	0.304184	5.1498	2.23739	0.711018	5.49924	3.81442e-08	7.20519e-07
LGALSL	10.3956	14.1207	8.53304	-0.665518	0.444898	-5.49732	3.85615e-08	7.27913e-07
MNX1	11.6806	0.0371573	17.5023	4.157	1.24268	5.49651	3.8739e-08	7.30774e-07
SLC9A3R2	51.753	73.6206	40.8192	-0.835407	0.442573	-5.49545	3.89718e-08	7.34673e-07
SF3B3	119.266	32.419	162.689	2.29222	0.191427	5.49472	3.91337e-08	7.37231e-07
ATP5MD	268.351	339.127	232.962	-0.539799	0.360782	-5.49311	3.9492e-08	7.43484e-07
CCM2L	2.70297	5.27357	1.41766	-1.37567	0.583932	-5.49289	3.95413e-08	7.43916e-07
GBAP1	7.62428	1.13628	10.8683	2.47394	0.343174	5.4917	3.98084e-08	7.48441e-07
TESK1	35.2873	28.7914	38.5353	0.408248	0.224736	-5.49057	4.00645e-08	7.52753e-07
FSCN1	94.9237	13.3786	135.696	3.24898	0.46312	5.49028	4.01298e-08	7.53478e-07
CBARP	3.02339	0.235369	4.4174	2.13266	0.646743	5.48903	4.04144e-08	7.5817e-07
TNFAIP6	2.78101	6.34762	0.997708	-1.87893	0.659421	-5.48895	4.04336e-08	7.5817e-07
SYPL1	51.1621	53.2583	50.114	-0.0861262	0.270687	-5.48875	4.04799e-08	7.58396e-07
NCAPD2	20.6245	4.70806	28.5828	2.37368	0.231865	5.48866	4.04995e-08	7.58396e-07
STARD7	33.1097	44.9911	27.1689	-0.70725	0.434636	-5.48784	4.0687e-08	7.60941e-07
IL2RG	2.46106	4.66106	1.36106	-1.26164	0.617262	-5.48783	4.06894e-08	7.60941e-07
ISCU	125.381	173.182	101.48	-0.765254	0.381596	-5.48735	4.07997e-08	7.62497e-07
PHF21A	35.8928	8.58336	49.5474	2.39903	0.207465	5.48582	4.11556e-08	7.68637e-07
PGAP2	50.8196	10.3671	71.0458	2.66405	0.215254	5.4807	4.23635e-08	7.90673e-07
GSDMC	1.40518	4.09735	0.0590923	-2.26692	1.18881	-5.4801	4.25096e-08	7.92875e-07
GSTK1	96.2503	110.867	88.9419	-0.314722	0.294029	-5.47835	4.29313e-08	8.0021e-07
ANO5	4.98912	12.4249	1.27122	-2.56337	0.902005	-5.47475	4.38119e-08	8.15701e-07
XYLT2	18.8985	4.78871	25.9534	2.21916	0.224191	5.47472	4.38203e-08	8.15701e-07
HIST1H2BE	3.80691	0.315222	5.55276	2.3168	0.495786	5.47406	4.39846e-08	8.18218e-07
LAMTOR5	118.029	131.452	111.317	-0.237904	0.302932	-5.47266	4.43324e-08	8.24143e-07
DLX2	4.73266	0	7.09898	3.01774	1.51265	5.47075	4.4813e-08	8.32529e-07
C21orf58	9.03135	1.41577	12.8391	2.5182	0.295243	5.47061	4.48497e-08	8.32661e-07
ZP3	12.068	1.58161	17.3112	2.82638	0.535088	5.46615	4.59927e-08	8.53319e-07
DLST	48.9994	51.5412	47.7285	-0.108684	0.308374	-5.46425	4.64875e-08	8.61932e-07
KIF1B	24.4831	46.2417	13.6037	-1.69372	0.635272	-5.46399	4.65557e-08	8.62628e-07
DEGS2	5.06665	0.110005	7.54497	2.94451	0.739675	5.46238	4.69794e-08	8.69907e-07
CERS5	68.2077	18.3034	93.1598	2.28626	0.225482	5.46158	4.71905e-08	8.73241e-07
COX4I1	416.782	549.927	350.209	-0.64953	0.380402	-5.46134	4.72551e-08	8.73862e-07
SYNE1	16.939	17.7572	16.5299	-0.0976296	0.316018	-5.46105	4.73324e-08	8.74717e-07
DHRS7	50.6858	57.1518	47.4528	-0.263244	0.314829	-5.46067	4.74351e-08	8.76041e-07
SELPLG	1.21862	2.74191	0.456975	-1.3608	0.683517	-5.46004	4.7603e-08	8.78566e-07
LRRC49	13.1957	2.40423	18.5914	2.52482	0.381714	5.45705	4.84115e-08	8.92903e-07
GSTM4	13.311	23.2239	8.35461	-1.37268	0.565208	-5.454	4.92488e-08	9.07187e-07
FAM69A	7.97072	11.5305	6.19082	-0.801221	0.415045	-5.454	4.92504e-08	9.07187e-07
FABP7	3.79743	10.3088	0.541734	-2.87482	0.945101	-5.45314	4.94875e-08	9.10958e-07
YPEL2	6.42202	7.81215	5.72696	-0.389541	0.35566	-5.45272	4.96062e-08	9.12546e-07
PSMD1	45.6025	39.8554	48.4761	0.276204	0.267931	-5.45256	4.965e-08	9.12756e-07
HIGD1A	66.3834	80.1836	59.4833	-0.424652	0.351244	-5.45209	4.97825e-08	9.14303e-07
ARAP3	3.79772	4.88206	3.25556	-0.466973	0.390459	-5.45203	4.97991e-08	9.14303e-07
PITX2	7.30694	21.12	0.400418	-3.98142	1.39296	-5.45158	4.99238e-08	9.15996e-07
RXRG	5.0484	12.9094	1.11792	-2.71534	0.889878	-5.44955	5.04976e-08	9.24987e-07
F8	8.44197	10.4495	7.43819	-0.440286	0.384651	-5.4495	5.05121e-08	9.24987e-07
LMBRD1	26.5637	31.1807	24.2553	-0.349611	0.287964	-5.4495	5.05123e-08	9.24987e-07
ARRDC2	17.856	30.1137	11.7272	-1.28964	0.624704	-5.4486	5.07689e-08	9.29081e-07
ANKS6	15.3949	3.77343	21.2056	2.21783	0.277311	5.44745	5.10972e-08	9.34481e-07
KCNQ2	82.4014	0.133235	123.535	6.77997	1.37889	5.44593	5.15366e-08	9.41906e-07
EGLN1	22.7272	37.2324	15.4746	-1.21455	0.55941	-5.44576	5.15855e-08	9.41933e-07
ANKRD33B	1.21308	2.51636	0.561446	-1.1712	0.643839	-5.44569	5.1605e-08	9.41933e-07
NUDT11	7.34119	0.373352	10.8251	3.10608	0.709717	5.44557	5.16388e-08	9.41939e-07
ACAA1	38.7389	34.9574	40.6296	0.211324	0.182735	-5.44445	5.1966e-08	9.47295e-07
NDUFAB1	92.2727	128.315	74.2517	-0.781088	0.450023	-5.44394	5.21153e-08	9.49402e-07
GYS1	46.0951	78.4288	29.9283	-1.36074	0.639538	-5.44306	5.23742e-08	9.53362e-07
RBM4	96.3011	32.494	128.205	1.94768	0.134067	5.44297	5.24004e-08	9.53362e-07
GPX4	322.091	588.129	189.073	-1.63203	0.464191	-5.43966	5.3382e-08	9.70593e-07
AC012651.1	4.29419	9.4609	1.71083	-1.9482	0.759888	-5.43859	5.3704e-08	9.7582e-07
KCNQ4	0.873236	1.51814	0.550784	-0.699361	0.574167	-5.43749	5.40356e-08	9.81211e-07
C11orf49	43.0722	12.6008	58.3079	2.12453	0.199515	5.43597	5.45e-08	9.89007e-07
DRAM1	6.18035	7.38432	5.57837	-0.349964	0.414738	-5.43461	5.49172e-08	9.95936e-07
IL16	3.85669	5.95378	2.80815	-0.868708	0.636451	-5.43155	5.58657e-08	1.01249e-06
PHC1P1	4.10633	0.512025	5.90348	2.19084	0.41359	5.43094	5.60568e-08	1.01529e-06
TRAF7	47.8943	11.102	66.2904	2.47516	0.249683	5.43042	5.62222e-08	1.01764e-06
GALNT15	11.7234	18.4875	8.34131	-1.06085	0.808007	-5.42738	5.71858e-08	1.03441e-06
SIGLEC1	1.65063	4.36212	0.294881	-2.04998	0.899179	-5.42679	5.73761e-08	1.03719e-06
MRPL54	46.0833	47.8606	45.1947	-0.0809437	0.218532	-5.42474	5.80393e-08	1.0485e-06
PDCD1LG2	0.808204	2.08263	0.170989	-1.39644	0.854992	-5.42457	5.80937e-08	1.04881e-06
PDE5A	11.6792	9.99314	12.5222	0.298726	0.581373	-5.42393	5.83023e-08	1.05191e-06
IL15	2.70024	4.6328	1.73396	-1.04286	0.378678	-5.42381	5.83416e-08	1.05194e-06
DCAF6	60.8477	105.085	38.7292	-1.41694	0.613831	-5.4235	5.8444e-08	1.05311e-06
MCRIP2	14.8835	29.2492	7.70066	-1.7977	0.60311	-5.42198	5.89413e-08	1.06139e-06
FAM171A2	7.70617	0.301457	11.4085	3.25313	0.742354	5.42135	5.91519e-08	1.06413e-06
CDC6	2.42556	0.194728	3.54097	1.92632	0.530208	5.4213	5.91688e-08	1.06413e-06
SESN1	22.7557	36.1934	16.0369	-1.12639	0.577242	-5.42023	5.95235e-08	1.06983e-06
ITGAM	2.39888	4.95363	1.1215	-1.48868	0.782203	-5.41756	6.04179e-08	1.08521e-06
LSMEM2	1.22947	2.95888	0.364764	-1.53644	0.902254	-5.41741	6.04672e-08	1.0854e-06
ZC3H12C	1.60096	2.38159	1.21064	-0.613235	0.425608	-5.41663	6.07312e-08	1.08945e-06
B3GALT6	14.183	3.16597	19.6915	2.31232	0.254028	5.41608	6.09203e-08	1.09214e-06
CENPE	1.58603	0.190996	2.28355	1.46309	0.427981	5.41556	6.10983e-08	1.0943e-06
HMX1	10.5747	0	15.862	4.07571	1.63495	5.41547	6.11271e-08	1.0943e-06
XXYLT1	21.0987	3.4048	29.9456	2.81259	0.458831	5.41538	6.11572e-08	1.0943e-06
NDUFA5	73.2378	91.9298	63.8918	-0.518105	0.462418	-5.41493	6.13124e-08	1.09638e-06
SLC25A22	21.3567	2.32248	30.8739	3.26204	0.537344	5.41396	6.16473e-08	1.10167e-06
UBE2D1	22.7221	40.772	13.6971	-1.507	0.628953	-5.41205	6.23082e-08	1.11278e-06
MYOG	4.02934	11.6033	0.242356	-3.34265	1.37452	-5.41185	6.23779e-08	1.11332e-06
DBN1	109.593	20.9443	153.918	2.81959	0.31206	5.40971	6.31256e-08	1.12595e-06
TTLL11	2.80608	3.68466	2.3668	-0.476567	0.402107	-5.40947	6.32105e-08	1.12675e-06
SLCO5A1	0.891372	2.24855	0.212785	-1.42147	1.11215	-5.40857	6.35307e-08	1.13174e-06
C1orf127	0.870754	2.05599	0.278134	-1.2576	0.820163	-5.40796	6.37458e-08	1.13485e-06
MSANTD2	16.1776	4.22582	22.1534	2.1475	0.212637	5.40657	6.42432e-08	1.14299e-06
TXLNA	26.0909	8.29733	34.9877	1.95262	0.157864	5.40474	6.49031e-08	1.154e-06
TRABD2B	8.82849	0.632808	12.9263	3.09239	0.562765	5.40097	6.62814e-08	1.17776e-06
SCHIP1	9.28224	23.4388	2.20394	-2.93126	0.855068	-5.40084	6.63281e-08	1.17785e-06
CDC7	7.20961	1.06212	10.2834	2.452	0.544571	5.40005	6.66221e-08	1.18232e-06
RCOR2	8.78266	0.7771	12.7854	2.95555	0.516502	5.39929	6.69047e-08	1.18659e-06
PSMA6	104.867	111.86	101.37	-0.140738	0.266146	-5.39831	6.72708e-08	1.19233e-06
ZNF229	3.55247	0.948066	4.85467	1.58755	0.331014	5.39783	6.74525e-08	1.1948e-06
UQCRC1	140.147	199.461	110.489	-0.846419	0.518069	-5.39649	6.79575e-08	1.20299e-06
TMEM98	73.8008	9.70186	105.85	3.31966	0.430369	5.39578	6.82272e-08	1.207e-06
ATP5PD	261	334.78	224.109	-0.57689	0.3796	-5.3951	6.84842e-08	1.21079e-06
HIST1H2BN	3.49623	0.565484	4.9616	1.92909	0.385865	5.39473	6.86273e-08	1.21256e-06
LRFN1	3.48465	0.223596	5.11518	2.32127	0.630542	5.39338	6.91426e-08	1.2209e-06
PLPP5	59.2071	11.9424	82.8394	2.69553	0.315982	5.39323	6.92015e-08	1.22117e-06
S1PR1	12.0204	23.3321	6.36461	-1.72418	0.628705	-5.39204	6.96603e-08	1.22733e-06
GYPC	41.1522	69.0333	27.2116	-1.31175	0.489831	-5.392	6.9678e-08	1.22733e-06
ATP8B4	2.24633	5.45805	0.640476	-1.97698	0.895083	-5.39199	6.9681e-08	1.22733e-06
SCCPDH	23.1183	25.544	21.9054	-0.212697	0.273809	-5.39121	6.99837e-08	1.23189e-06
CKAP2	17.0744	2.84458	24.1893	2.71191	0.359316	5.39057	7.0235e-08	1.23554e-06
FAAP100	21.2299	5.65928	29.0151	2.17225	0.209072	5.38945	7.0674e-08	1.24249e-06
CARD6	2.01353	3.68327	1.17866	-1.10407	0.696191	-5.38807	7.12172e-08	1.25125e-06
C20orf24	46.3939	48.1454	45.5182	-0.0792607	0.267007	-5.38416	7.27845e-08	1.27799e-06
CMA1	1.508	3.54612	0.488941	-1.61035	0.838141	-5.38354	7.30366e-08	1.28162e-06
CDCA2	2.15685	0.0681687	3.20119	1.97566	0.896292	5.38263	7.34037e-08	1.28647e-06
KIF14	1.0946	0.111007	1.58639	1.21907	0.45725	5.38263	7.3404e-08	1.28647e-06
FBXW9	5.98319	0.974049	8.48775	2.26491	0.36142	5.37962	7.4643e-08	1.30737e-06
PCDHGC4	2.00141	0.21696	2.89364	1.67784	0.53455	5.37749	7.5532e-08	1.32211e-06
AKAP7	5.49536	5.87241	5.30684	-0.123899	0.284239	-5.3755	7.63685e-08	1.33593e-06
TSR3	28.3463	29.5928	27.7231	-0.0909832	0.255362	-5.37358	7.71893e-08	1.34945e-06
CHD5	0.855231	0.0389457	1.26337	1.12335	0.75324	5.37334	7.72929e-08	1.35042e-06
SMG9	35.3357	6.43565	49.7858	2.77189	0.227081	5.37258	7.76163e-08	1.35523e-06
SPICE1	11.9131	2.31561	16.7118	2.41736	0.417658	5.37229	7.77443e-08	1.35662e-06
EDN1	3.76388	7.91594	1.68785	-1.72993	0.56118	-5.37197	7.78806e-08	1.35816e-06
CENPJ	15.9806	2.32693	22.8074	2.83915	0.275083	5.36888	7.92269e-08	1.38078e-06
MOB2	29.3439	31.1858	28.423	-0.129479	0.249461	-5.36807	7.95838e-08	1.38608e-06
NUDT16	12.8466	12.2199	13.1599	0.0991014	0.247691	-5.36797	7.96291e-08	1.38608e-06
RNF44	60.3047	6.17471	87.3697	3.62256	0.366328	5.36622	8.0402e-08	1.39867e-06
PHF12	24.2418	7.25866	32.7334	2.0302	0.185941	5.36554	8.07062e-08	1.40309e-06
NDOR1	11.0149	2.33685	15.354	2.29308	0.301563	5.3649	8.09934e-08	1.40722e-06
GRB7	10.1568	0.137004	15.1666	3.82971	1.16015	5.36368	8.15412e-08	1.41586e-06
UQCRFS1P1	12.1918	20.5702	8.00265	-1.26062	0.579885	-5.36351	8.16181e-08	1.41632e-06
AURKAIP1	67.1266	82.7361	59.3219	-0.473166	0.356996	-5.3606	8.29447e-08	1.43846e-06
PKMYT1	6.39319	0.4435	9.36804	2.8445	0.717612	5.36023	8.31171e-08	1.44056e-06
ANKRD20A19P	2.24308	4.59935	1.06495	-1.43915	0.73427	-5.35868	8.38312e-08	1.45204e-06
TMEM25	31.0731	4.65025	44.2845	3.00263	0.308707	5.35844	8.39459e-08	1.45314e-06
NDUFB9	241.871	358.341	183.635	-0.960676	0.48193	-5.35794	8.41784e-08	1.45627e-06
PELO	5.66263	6.77691	5.10548	-0.349093	0.220668	-5.35775	8.42629e-08	1.45683e-06
POLR3GL	36.9565	43.2897	33.79	-0.348298	0.331159	-5.35601	8.50805e-08	1.47007e-06
FAM49A	3.87471	4.48516	3.56949	-0.263502	0.273851	-5.35528	8.54244e-08	1.4751e-06
ATP6V1B1	7.66711	0.825742	11.0878	2.727	0.418508	5.35171	8.71246e-08	1.50354e-06
ETFA	91.6348	129.193	72.8557	-0.81787	0.456916	-5.35052	8.77027e-08	1.51259e-06
TRPS1	73.6587	4.58815	108.194	4.28838	0.749258	5.3496	8.81507e-08	1.51939e-06
NTF3	25.4411	0.992042	37.6657	4.27873	0.710623	5.34948	8.82062e-08	1.51941e-06
FBXL16	2.10653	0.106844	3.10637	1.89141	0.728252	5.34917	8.83571e-08	1.52108e-06
APBA2	2.72506	0.146732	4.01423	2.1285	0.805101	5.3489	8.84884e-08	1.52241e-06
MAPK8IP3	53.1628	12.8682	73.3101	2.42178	0.214778	5.34824	8.88141e-08	1.52708e-06
PLPP7	18.1348	41.742	6.33121	-2.54353	0.819309	-5.34807	8.88969e-08	1.52757e-06
RAB39B	1.39918	0	2.09877	1.6317	1.30419	5.34781	8.90238e-08	1.52882e-06
ADIRF	235.824	649.499	28.987	-4.43914	0.97693	-5.34516	9.03354e-08	1.5504e-06
NUDT8	7.82088	17.264	3.09934	-2.15554	0.76257	-5.34484	9.04952e-08	1.5522e-06
TEX261	26.5108	22.1155	28.7084	0.362011	0.218994	-5.34457	9.06295e-08	1.55355e-06
WASF1	27.3299	1.427	40.2814	4.08825	0.687972	5.34236	9.17431e-08	1.57169e-06
DUXAP9	66.4819	5.98632	96.7297	3.80619	0.614778	5.33897	9.34778e-08	1.60043e-06
KCTD9	18.2013	15.8972	19.3534	0.268491	0.222284	-5.33882	9.35539e-08	1.60076e-06
ZIC2	139.494	2.29843	208.092	5.98621	1.06646	5.33428	9.5924e-08	1.64032e-06
MRPL23	34.2513	45.9231	28.4154	-0.673726	0.381657	-5.33401	9.60679e-08	1.64082e-06
PAICS	46.3351	13.7805	62.6124	2.10561	0.248581	5.33401	9.60697e-08	1.64082e-06
MMP17	56.0776	1.81158	83.2107	4.90455	0.77717	5.33328	9.64523e-08	1.64635e-06
NCDN	19.9449	3.69027	28.0723	2.6319	0.302781	5.32796	9.93229e-08	1.69432e-06
GLMN	22.5407	4.15636	31.7328	2.66631	0.223527	5.32784	9.93857e-08	1.69437e-06
INHA	5.69384	0.345496	8.36802	2.79961	0.652882	5.32591	1.00447e-07	1.71142e-06
DSCAML1	5.80813	0.181405	8.6215	3.02576	0.834369	5.32524	1.00823e-07	1.71679e-06
DLAT	19.6278	26.966	15.9587	-0.721643	0.410318	-5.32336	1.01866e-07	1.73351e-06
UCK2	17.3477	5.34055	23.3512	1.94131	0.21519	5.32137	1.0299e-07	1.75158e-06
CYTH4	5.63617	8.70656	4.10098	-0.928184	0.628248	-5.32101	1.03193e-07	1.75398e-06
CNBP	265.393	334.198	230.99	-0.530948	0.401395	-5.31885	1.04427e-07	1.77387e-06
MAPK8IP2	3.36804	0.236667	4.93373	2.26248	0.638872	5.3186	1.0457e-07	1.77524e-06
OCLN	4.90938	0.336278	7.19594	2.61669	0.478932	5.31774	1.05062e-07	1.78251e-06
EVI2B	2.08969	5.20127	0.5339	-2.01536	0.805342	-5.3174	1.05263e-07	1.78484e-06
DNMT1	28.9321	8.63743	39.0794	2.05614	0.24064	5.31177	1.08563e-07	1.83969e-06
BRWD3	3.59201	0.794318	4.99086	1.73933	0.269263	5.31142	1.08773e-07	1.84214e-06
PODN	17.4422	25.4592	13.4337	-0.874326	0.515287	-5.31036	1.09411e-07	1.85183e-06
TSNAXIP1	3.84418	0.296501	5.61801	2.35178	0.599555	5.30993	1.09665e-07	1.85502e-06
TRIM72	7.40229	19.9901	1.10838	-3.3155	1.02731	-5.30977	1.09762e-07	1.85555e-06
TSC22D3	83.6969	107.243	71.9237	-0.569816	0.362513	-5.30915	1.10136e-07	1.86075e-06
PCDHGC3	112.864	22.8306	157.881	2.73706	0.332239	5.30846	1.10552e-07	1.86667e-06
PRKN	2.45446	4.11045	1.62647	-0.960323	0.453189	-5.30584	1.12156e-07	1.8926e-06
TEDC2	4.60284	0.141959	6.83328	2.77811	0.807747	5.30371	1.1347e-07	1.91363e-06
USF3	6.05612	6.5119	5.82823	-0.137666	0.339506	-5.30203	1.14523e-07	1.93024e-06
SLC25A45	6.53557	7.60204	6.00234	-0.296842	0.453526	-5.30017	1.15694e-07	1.94771e-06
NPY1R	9.04292	24.3034	1.41266	-3.39064	0.95705	-5.30016	1.157e-07	1.94771e-06
AC010326.4	15.8177	2.1763	22.6384	2.89571	0.364954	5.30006	1.15767e-07	1.94771e-06
MMP28	2.45412	5.61848	0.871943	-1.82196	0.670416	-5.29807	1.17035e-07	1.96786e-06
AL136982.4	4.12362	8.66475	1.85305	-1.76023	0.595743	-5.29755	1.17366e-07	1.97225e-06
PLA2G7	3.14983	8.68836	0.380564	-2.811	0.966888	-5.29682	1.17836e-07	1.97896e-06
RBMX	200.585	51.6217	275.067	2.39129	0.259632	5.29638	1.18118e-07	1.98253e-06
SIRT2	70.4184	119.265	45.9953	-1.35563	0.603542	-5.29493	1.19064e-07	1.99722e-06
SLC6A11	2.49787	0.0681433	3.71274	2.14146	0.829754	5.29479	1.19152e-07	1.99751e-06
ADSSL1	71.5076	178.749	17.8868	-3.25053	0.989326	-5.28843	1.23372e-07	2.06702e-06
ZNF610	5.41324	1.18403	7.52785	1.96519	0.381746	5.28807	1.23617e-07	2.06989e-06
TRPV4	2.03381	0.18748	2.95698	1.7365	0.562187	5.2865	1.24677e-07	2.0864e-06
PRR36	4.18004	0.038827	6.25065	2.80315	1.22726	5.28614	1.24927e-07	2.08933e-06
MRPL33	139.928	208.199	105.793	-0.970062	0.524753	-5.2854	1.2543e-07	2.09651e-06
IMPDH2	287.159	66.1003	397.688	2.57087	0.252545	5.28417	1.26277e-07	2.1094e-06
FAM222A	9.4882	0.390601	14.037	3.43474	0.70097	5.28353	1.26715e-07	2.11548e-06
BCL11A	9.67051	1.09711	13.9572	2.83437	0.539303	5.28282	1.27209e-07	2.12247e-06
VILL	9.71688	2.1256	13.5125	2.21509	0.362026	5.28163	1.28037e-07	2.13501e-06
WLS	84.115	11.0104	120.667	3.34059	0.400729	5.27908	1.29831e-07	2.16365e-06
RTKN2	1.78158	0.252494	2.54612	1.50144	0.510457	5.27734	1.31076e-07	2.1831e-06
NDUFA8	52.3699	67.22	44.9448	-0.570293	0.410604	-5.2769	1.31389e-07	2.18702e-06
REEP4	17.3365	3.75618	24.1267	2.40134	0.276664	5.27583	1.32159e-07	2.19854e-06
CAB39L	9.90819	15.4984	7.11308	-1.02401	0.464809	-5.2749	1.3283e-07	2.20722e-06
C7orf49	53.6517	92.5137	34.2206	-1.40876	0.205463	-5.27489	1.32838e-07	2.20722e-06
FP565260.6	31.4149	42.5981	25.8233	-0.700782	0.484764	-5.27402	1.33468e-07	2.21638e-06
FGF11	37.8114	3.37093	55.0316	3.68023	0.448906	5.27327	1.34012e-07	2.22411e-06
IGIP	7.42558	7.78266	7.24704	-0.0907821	0.257211	-5.27208	1.34887e-07	2.23672e-06
IRS2	5.88182	8.64847	4.49849	-0.811265	0.406892	-5.27202	1.34931e-07	2.23672e-06
SCX	86.7515	6.03526	127.11	4.18663	0.525524	5.26991	1.36488e-07	2.26121e-06
SBK3	0.378721	1.10275	0.0167055	-1.04838	1.34043	-5.26979	1.36578e-07	2.26136e-06
ZNF366	1.25216	1.84809	0.95419	-0.543426	0.526125	-5.26868	1.37407e-07	2.27375e-06
NDUFB8	175.694	192.156	167.463	-0.197334	0.326187	-5.26526	1.39989e-07	2.31511e-06
FMO3	5.08473	12.8144	1.2199	-2.63761	0.990628	-5.26337	1.41439e-07	2.33772e-06
MCFD2	38.1802	30.8197	41.8604	0.429727	0.203662	-5.2627	1.41952e-07	2.34483e-06
NAB2	27.6386	5.30637	38.8047	2.65806	0.315263	5.26212	1.42406e-07	2.35094e-06
CNPY4	37.9107	5.37119	54.1804	3.11452	0.412783	5.26146	1.42917e-07	2.35801e-06
UQCRQ	187.852	278.377	142.589	-0.960265	0.47848	-5.26026	1.43856e-07	2.3721e-06
PAQR6	6.27744	0.526452	9.15293	2.73364	0.587962	5.25983	1.44191e-07	2.37624e-06
LYZ	19.1602	54.1957	1.6425	-4.38458	1.08899	-5.25959	1.44379e-07	2.37795e-06
RFPL1	4.72555	0.0851607	7.04575	2.89032	0.971728	5.25908	1.4478e-07	2.38237e-06
CRYZL2P	6.18521	7.26755	5.64404	-0.315398	0.266898	-5.25903	1.44817e-07	2.38237e-06
GLRX5	46.13	56.8365	40.7768	-0.469278	0.44993	-5.25588	1.47317e-07	2.42208e-06
MRVI1	1.71898	3.53303	0.811962	-1.32292	0.759151	-5.25518	1.47882e-07	2.42996e-06
ABCB9	14.4927	1.69461	20.8917	3.02224	0.395152	5.25356	1.49189e-07	2.44991e-06
STRA6	12.2166	0.413537	18.1181	3.75756	0.7894	5.25341	1.49309e-07	2.44991e-06
CADM3	2.67415	7.36247	0.32999	-2.65251	0.968456	-5.25335	1.49357e-07	2.44991e-06
CEP68	10.2331	10.4313	10.134	-0.0380127	0.276959	-5.25243	1.50109e-07	2.46082e-06
FAM69B	23.4971	4.21771	33.1368	2.70984	0.296191	5.25213	1.50349e-07	2.46331e-06
ABCC12	0.183153	0.515954	0.0167523	-0.576258	1.39274	-5.25129	1.51038e-07	2.47316e-06
SORBS3	97.2618	98.0787	96.8534	-0.0179534	0.228494	-5.2504	1.51769e-07	2.48369e-06
TLR4	2.13137	5.03531	0.679404	-1.84548	0.728283	-5.24935	1.52636e-07	2.49535e-06
PYCR1	31.8108	3.44114	45.9957	3.40353	0.542943	5.24926	1.5271e-07	2.49535e-06
MRPS28	47.0682	50.6586	45.2731	-0.158834	0.422643	-5.24922	1.52748e-07	2.49535e-06
TOMM34	24.819	4.12833	35.1643	2.818	0.325776	5.24879	1.53103e-07	2.49971e-06
ATP23	10.8011	10.7827	10.8103	0.00338543	0.222244	-5.24776	1.53961e-07	2.51225e-06
NDUFB2	218.334	295.723	179.639	-0.716006	0.41794	-5.24748	1.54191e-07	2.51456e-06
TEAD1	18.7702	26.9915	14.6596	-0.837936	0.417255	-5.2462	1.55264e-07	2.53059e-06
ANKRD39	10.2892	15.2228	7.82244	-0.87877	0.720772	-5.24512	1.56179e-07	2.54403e-06
SGCB	28.015	38.8656	22.5897	-0.756985	0.421389	-5.24338	1.57659e-07	2.56665e-06
ZNF544	24.6548	5.0898	34.4372	2.5408	0.221597	5.24178	1.59037e-07	2.58759e-06
MRPS18C	28.5308	29.588	28.0023	-0.0768001	0.247561	-5.23967	1.60861e-07	2.61576e-06
ENDOD1	10.0036	18.3381	5.83626	-1.50017	0.635218	-5.2386	1.61798e-07	2.6283e-06
CHRND	4.97897	14.4291	0.253922	-3.62113	1.55198	-5.23857	1.61822e-07	2.6283e-06
LRRFIP2	26.8177	32.396	24.0286	-0.4161	0.412554	-5.23847	1.61912e-07	2.6283e-06
ERF	93.4559	15.1775	132.595	3.04581	0.369419	5.23707	1.63142e-07	2.64673e-06
GOLM1	57.5176	10.495	81.0289	2.83513	0.354995	5.2353	1.64721e-07	2.67082e-06
ZNF730	3.96805	0.153235	5.87545	2.57577	0.830778	5.23478	1.65182e-07	2.67675e-06
UBE2F	27.1111	27.4631	26.9351	-0.0270138	0.307085	-5.23406	1.6583e-07	2.6857e-06
TMEM9	55.8144	15.5843	75.9294	2.21372	0.203712	5.23176	1.67903e-07	2.71682e-06
NOL3	36.6348	47.2817	31.3113	-0.579439	0.463741	-5.23172	1.67944e-07	2.71682e-06
ZSCAN1	6.02353	0.149102	8.96074	3.11575	0.902529	5.23042	1.69124e-07	2.73433e-06
GINS4	3.76737	0.488834	5.40664	2.10538	0.468609	5.2302	1.69329e-07	2.73582e-06
NPY6R	6.92458	19.484	0.644876	-3.63845	1.32253	-5.23009	1.69423e-07	2.73582e-06
CDR1	2.05624	5.56903	0.299838	-2.33735	0.95647	-5.23	1.69513e-07	2.73582e-06
JMJD7-PLA2G4B	11.7435	2.52552	16.3525	2.29924	0.308191	5.2299	1.69605e-07	2.73582e-06
COL13A1	27.1612	1.51273	39.9854	4.02778	0.830842	5.22808	1.71279e-07	2.76124e-06
PABPC4L	2.33659	0.252662	3.37856	1.80546	0.514565	5.22769	1.71637e-07	2.76544e-06
INTS6L	9.68719	1.56626	13.7477	2.52275	0.367691	5.22757	1.71755e-07	2.76575e-06
ZNF8	3.77126	0.750299	5.28174	1.84356	0.28284	5.22727	1.72031e-07	2.76785e-06
COX8A	433.299	634.594	332.651	-0.929767	0.488063	-5.22722	1.72082e-07	2.76785e-06
STON2	1.30956	2.25018	0.839248	-0.821405	0.681323	-5.22578	1.7342e-07	2.78778e-06
NELFA	27.238	7.34113	37.1865	2.19475	0.178936	5.22354	1.75536e-07	2.82019e-06
NT5DC2	63.7524	9.83541	90.7109	3.08134	0.369733	5.22296	1.76087e-07	2.82743e-06
SNX22	2.23665	0.221453	3.24425	1.79691	0.483343	5.22245	1.76574e-07	2.83363e-06
GSTCD	4.03874	1.0653	5.52547	1.65973	0.212586	5.22231	1.76703e-07	2.83409e-06
ACADL	4.21252	7.14211	2.74773	-1.11939	0.616815	-5.22106	1.77898e-07	2.85163e-06
PRSS35	4.91984	0.294488	7.23252	2.66895	0.624306	5.22016	1.78768e-07	2.86395e-06
ENPP6	27.776	0.348044	41.49	4.97818	1.14329	5.21756	1.81291e-07	2.90272e-06
PI16	13.9159	40.0087	0.869531	-4.45518	1.05703	-5.21688	1.81964e-07	2.91184e-06
PLEKHM2	28.1397	27.3633	28.5279	0.0580524	0.318977	-5.21637	1.82468e-07	2.9176e-06
PPP2R3A	13.7726	28.2908	6.51346	-1.9629	0.693558	-5.2163	1.82531e-07	2.9176e-06
TMEM121	6.35145	0.357721	9.34831	2.93014	0.644099	5.21117	1.87652e-07	2.99775e-06
ST6GALNAC1	1.07223	1.85145	0.682611	-0.760995	0.77745	-5.21091	1.87914e-07	3.00023e-06
SLC12A9	21.2959	4.36585	29.7609	2.51922	0.266545	5.21001	1.88835e-07	3.01323e-06
HCST	5.64733	13.1583	1.89184	-2.29159	0.692378	-5.20826	1.90615e-07	3.03991e-06
RNF157	8.01171	13.2555	5.38983	-1.15767	0.558426	-5.20727	1.9164e-07	3.0539e-06
ZNFX1	8.32216	7.31377	8.82635	0.241153	0.186523	-5.2072	1.91709e-07	3.0539e-06
CYB5R3	112.576	170.567	83.5801	-1.02039	0.393888	-5.20697	1.91949e-07	3.05599e-06
ITIH4	16.0459	29.91	9.11384	-1.61174	0.813877	-5.20612	1.92826e-07	3.06822e-06
IDH2	116.836	253.772	48.3678	-2.36756	0.787656	-5.20326	1.95824e-07	3.11417e-06
DHRS7B	16.8657	17.3643	16.6164	-0.0599823	0.259861	-5.20285	1.96257e-07	3.1181e-06
TP53BP1	30.6663	6.09382	42.9526	2.63131	0.242634	5.20281	1.96293e-07	3.1181e-06
FBXW5	46.7369	54.9973	42.6067	-0.360809	0.390577	-5.20267	1.96445e-07	3.11876e-06
DUSP10	3.48767	6.6138	1.9246	-1.38038	0.644252	-5.20242	1.96707e-07	3.12116e-06
GPR157	4.57187	5.83014	3.94273	-0.466608	0.606573	-5.19977	1.99532e-07	3.1642e-06
NRIP1	5.14084	7.99038	3.71607	-0.930796	0.442525	-5.19855	2.00852e-07	3.18334e-06
FLII	102.318	127.436	89.7589	-0.50094	0.443798	-5.19767	2.01804e-07	3.19664e-06
EMCN	10.4831	18.1579	6.6457	-1.32522	0.66708	-5.19706	2.02468e-07	3.20535e-06
NECTIN1	14.8134	1.79258	21.3238	2.99891	0.535604	5.19606	2.03553e-07	3.22071e-06
RBM14	43.3561	12.6448	58.7118	2.12967	0.189602	5.19539	2.04294e-07	3.23062e-06
C6orf203	18.3616	21.1034	16.9907	-0.297022	0.348224	-5.19452	2.05244e-07	3.24382e-06
CLSPN	2.46163	0.170167	3.60736	1.97723	0.706714	5.19439	2.05391e-07	3.24432e-06
ZBED9	1.76835	0.0264663	2.63929	1.82597	0.988153	5.19149	2.08617e-07	3.29344e-06
AC016582.3	6.5476	1.55918	9.04181	1.97226	0.368306	5.19137	2.08752e-07	3.29372e-06
AC006254.1	5.32038	11.9413	2.00992	-2.10419	0.866582	-5.18963	2.10713e-07	3.3228e-06
MKNK2	85.1757	144.109	55.7089	-1.35549	0.609006	-5.18898	2.11454e-07	3.33262e-06
HSPA1A	97.5091	169.181	61.6733	-1.44114	0.653294	-5.18812	2.12422e-07	3.34465e-06
KCMF1	30.6102	31.7177	30.0565	-0.0751784	0.315884	-5.1881	2.12455e-07	3.34465e-06
C12orf75	49.4551	109.61	19.3778	-2.44041	0.811152	-5.18705	2.13647e-07	3.36154e-06
ZNF814	30.0747	6.33803	41.9431	2.54896	0.317933	5.18656	2.14216e-07	3.36695e-06
CD59	201.756	262.398	171.435	-0.611194	0.443662	-5.18655	2.1423e-07	3.36695e-06
CTSL	45.0631	71.7142	31.7376	-1.15129	0.415736	-5.18616	2.14677e-07	3.37135e-06
SELENOV	5.15238	0.056448	7.70034	3.04185	1.02036	5.1861	2.14749e-07	3.37135e-06
TMCC3	2.79824	3.82936	2.28267	-0.556961	0.425639	-5.18552	2.15414e-07	3.3799e-06
ZNF382	3.86805	1.33065	5.13675	1.39674	0.276582	5.18429	2.16836e-07	3.40032e-06
NDUFA6	37.5572	45.7065	33.4825	-0.437759	0.435883	-5.18403	2.17139e-07	3.40318e-06
PRADC1	20.1534	35.4195	12.5204	-1.42957	0.601256	-5.18228	2.19189e-07	3.43339e-06
BNIP3	27.5932	47.6643	17.5577	-1.39085	0.522309	-5.18107	2.20621e-07	3.4539e-06
ABI3	1.76003	1.92322	1.67844	-0.126167	0.379685	-5.17934	2.22678e-07	3.48416e-06
C1orf159	11.5903	2.64878	16.0611	2.22523	0.283984	5.17838	2.23817e-07	3.50004e-06
CWC15	43.7617	40.1167	45.5842	0.180116	0.270243	-5.17709	2.25377e-07	3.52103e-06
LSM3	9.9634	9.16878	10.3607	0.159907	0.234337	-5.17706	2.25409e-07	3.52103e-06
LIMS1	20.3867	26.885	17.1376	-0.620508	0.341337	-5.17526	2.27599e-07	3.55326e-06
SSH2	14.2035	22.8257	9.89242	-1.12919	0.489231	-5.17453	2.28489e-07	3.56519e-06
DHRS4L2	21.3961	18.8021	22.6931	0.258816	0.231043	-5.17334	2.29947e-07	3.58595e-06
TRBC1	0.875168	2.42055	0.102477	-1.63348	1.10274	-5.17237	2.31148e-07	3.60268e-06
CSRP3	140.755	418.371	1.94693	-7.15287	1.77016	-5.17205	2.31541e-07	3.60681e-06
RRM2B	8.24842	10.7164	7.01441	-0.547863	0.376894	-5.16557	2.39708e-07	3.73197e-06
CHKB-CPT1B	4.60505	5.58668	4.11424	-0.365032	0.627055	-5.16545	2.39865e-07	3.73235e-06
ABCC10	23.3218	3.44041	33.2625	2.94786	0.243118	5.16292	2.43124e-07	3.78097e-06
NOL4L	16.4754	2.28358	23.5713	2.90363	0.391239	5.16183	2.44542e-07	3.80093e-06
ASB15	7.03745	21.0703	0.0210055	-4.43405	2.27089	-5.16094	2.45713e-07	3.81702e-06
ZNF718	7.53051	1.50259	10.5445	2.20571	0.30953	5.15776	2.49919e-07	3.87907e-06
POLD1	17.6621	2.90347	25.0414	2.73797	0.305442	5.15771	2.49983e-07	3.87907e-06
ZNF486	7.23042	1.31426	10.1885	2.2734	0.314101	5.15716	2.50728e-07	3.88849e-06
TATDN3	11.4336	10.7486	11.7761	0.120953	0.304619	-5.1554	2.53096e-07	3.92306e-06
LAP3	33.2465	32.4045	33.6676	0.0535468	0.206369	-5.15504	2.53582e-07	3.92842e-06
COX7A2	192.411	131.987	222.624	0.749792	0.170254	-5.15178	2.58028e-07	3.99511e-06
ZNF567	8.07298	2.40694	10.906	1.80514	0.230793	5.14966	2.60963e-07	4.03668e-06
NCF2	3.14673	6.4536	1.49329	-1.57989	0.756234	-5.14963	2.61e-07	4.03668e-06
NPTX2	60.1026	0.578494	89.8646	5.8471	1.09343	5.14939	2.6133e-07	4.03958e-06
HINT3	17.523	26.3487	13.1101	-0.954743	0.500385	-5.14923	2.6156e-07	4.04019e-06
FBP2	27.2044	78.2006	1.70631	-4.87112	1.36862	-5.14916	2.61657e-07	4.04019e-06
HSPB2	10.3713	20.5025	5.30567	-1.76978	0.720148	-5.14883	2.62111e-07	4.04499e-06
HRH3	1.15226	0	1.72839	1.44805	1.22175	5.1479	2.63425e-07	4.06304e-06
MDC1	6.01759	1.1973	8.42774	2.10118	0.288561	5.14709	2.64554e-07	4.07821e-06
FTCD	29.1941	1.01475	43.2837	4.45811	0.729983	5.14672	2.65084e-07	4.08414e-06
C6orf48	198.623	42.3226	276.772	2.68071	0.320473	5.1464	2.65529e-07	4.08877e-06
ETFRF1	35.292	42.3042	31.7858	-0.401434	0.396489	-5.14573	2.66481e-07	4.10118e-06
TBC1D32	14.5609	1.93383	20.8745	2.89839	0.575871	5.14476	2.67866e-07	4.12026e-06
ZSCAN18	60.0404	16.1781	81.9716	2.27205	0.212617	5.14131	2.7283e-07	4.19432e-06
UNC13A	4.18213	0.0300737	6.25815	2.81685	1.18169	5.14	2.74746e-07	4.22094e-06
AF228730.5	14.0686	3.06099	19.5724	2.34081	0.283755	5.13992	2.74861e-07	4.22094e-06
DONSON	27.2778	6.86433	37.4845	2.29088	0.199807	5.13975	2.75102e-07	4.22234e-06
FAM86B1	12.9519	1.10297	18.8763	3.24055	0.436604	5.13831	2.77219e-07	4.25251e-06
MTTP	0.193695	0.360269	0.110408	-0.292803	0.7402	-5.13786	2.77889e-07	4.26045e-06
GPR1	0.595758	0.980989	0.403142	-0.497559	0.562166	-5.13651	2.79882e-07	4.28868e-06
IL13RA1	21.8308	23.0163	21.2381	-0.110979	0.247739	-5.13552	2.81358e-07	4.30896e-06
RALBP1	31.2871	27.4911	33.1852	0.262861	0.18841	-5.13513	2.81954e-07	4.31574e-06
REPIN1	47.4988	55.9719	43.2622	-0.364175	0.371515	-5.13497	2.82194e-07	4.31706e-06
ATP5ME	360.017	505.518	287.267	-0.813208	0.466147	-5.13427	2.83247e-07	4.33082e-06
SSU72	76.687	73.9141	78.0734	0.0779551	0.207318	-5.13395	2.83726e-07	4.33579e-06
MYO7B	0.567232	1.15479	0.273454	-0.758797	0.873923	-5.13247	2.85964e-07	4.36761e-06
CXorf40A	12.4081	10.8646	13.1798	0.257177	0.217831	-5.13163	2.87246e-07	4.38087e-06
MAPKAPK2	29.959	36.0392	26.9189	-0.40781	0.396425	-5.13156	2.87346e-07	4.38087e-06
EPHB2	12.4618	0.932937	18.2262	3.31421	0.745854	5.13152	2.87414e-07	4.38087e-06
MAP3K5	3.18899	3.21572	3.17563	-0.0137844	0.628961	-5.13149	2.87454e-07	4.38087e-06
RYR1	54.0236	130.382	15.8442	-2.96345	1.27025	-5.13098	2.88234e-07	4.39038e-06
NTSR1	2.4738	0.0218743	3.69976	2.20137	1.19271	5.12896	2.91352e-07	4.43548e-06
PRSS21	12.0332	0.482416	17.8086	3.66537	0.83304	5.12823	2.92476e-07	4.45019e-06
PARL	38.0034	31.7222	41.144	0.365056	0.18022	-5.1278	2.93147e-07	4.45798e-06
PTDSS1	75.691	15.3455	105.864	2.70881	0.279428	5.1277	2.93305e-07	4.45798e-06
LILRA6	0.441475	1.10619	0.109119	-0.925218	0.83312	-5.12704	2.94337e-07	4.47126e-06
PROB1	5.26066	12.7889	1.49653	-2.46551	0.960892	-5.12653	2.95137e-07	4.48099e-06
MCF2	5.76454	0.0801947	8.60671	3.15275	1.10139	5.12616	2.95718e-07	4.4874e-06
ALDH6A1	15.2719	23.1669	11.3243	-0.971523	0.489432	-5.12552	2.96712e-07	4.50005e-06
DPP7	33.4703	51.7003	24.3554	-1.05552	0.504962	-5.12438	2.98513e-07	4.52493e-06
ARHGAP42	2.27706	3.64442	1.59338	-0.840664	0.472465	-5.12288	3.00904e-07	4.55872e-06
MYH2	462.98	1386.17	1.3842	-9.18443	2.21296	-5.12268	3.01216e-07	4.56099e-06
SLMAP	24.6358	30.8272	21.5401	-0.497765	0.440433	-5.12214	3.02082e-07	4.57165e-06
CLIP3	32.4709	5.23081	46.091	2.91796	0.434326	5.12046	3.0479e-07	4.61016e-06
SORT1	17.5352	27.5822	12.5117	-1.08091	0.484572	-5.11949	3.06371e-07	4.63158e-06
MEX3B	22.0114	0.769813	32.6322	4.24817	0.830052	5.11868	3.07677e-07	4.64883e-06
DMD	18.9459	35.4715	10.6831	-1.64234	0.809912	-5.11826	3.08361e-07	4.65667e-06
TANGO2	17.7087	24.8339	14.1461	-0.77032	0.348471	-5.11792	3.08929e-07	4.66274e-06
CKM	1730.85	5178.06	7.24078	-9.29569	2.12037	-5.11659	3.1111e-07	4.69315e-06
ANKRD2	52.3282	149.482	3.75123	-4.98515	1.44289	-5.11635	3.11504e-07	4.69657e-06
POGLUT1	12.869	3.09621	17.7554	2.19495	0.277977	5.11488	3.13935e-07	4.73069e-06
RNF13	33.0315	27.4043	35.8451	0.375366	0.208498	-5.11454	3.14513e-07	4.73686e-06
UBAC1	34.7619	46.5385	28.8735	-0.67023	0.494829	-5.11438	3.1477e-07	4.73821e-06
SEPT5	50.2649	4.22455	73.2851	3.82969	0.475205	5.11285	3.17336e-07	4.77428e-06
IRAK1BP1	10.7939	4.30635	14.0377	1.50279	0.255122	5.11271	3.17564e-07	4.77515e-06
SAR1B	26.6296	34.2828	22.8031	-0.567816	0.527191	-5.11216	3.18501e-07	4.7867e-06
PCDHA4	5.01764	0.364473	7.34422	2.61243	0.393461	5.11141	3.19765e-07	4.80313e-06
MAVS	13.1803	14.373	12.5839	-0.178492	0.31612	-5.11123	3.20062e-07	4.80503e-06
SLC7A3	2.3126	0	3.4689	2.15992	1.37749	5.11075	3.20881e-07	4.81475e-06
VPS13D	17.7824	13.5079	19.9196	0.528014	0.263211	-5.10999	3.22179e-07	4.83166e-06
AKR1C3	28.1552	68.906	7.77988	-2.99314	0.844096	-5.10955	3.22933e-07	4.84039e-06
ACKR4	2.24889	6.01802	0.364332	-2.36287	0.949288	-5.10791	3.25733e-07	4.87976e-06
NR3C1	15.9534	20.351	13.7547	-0.533127	0.33736	-5.10709	3.27161e-07	4.89855e-06
AC068279.1	15.676	2.05192	22.4881	2.94414	0.405413	5.10645	3.28276e-07	4.91263e-06
CCDC24	16.7358	0.734111	24.7366	3.89155	0.699614	5.10499	3.30814e-07	4.94798e-06
TSPYL2	46.8157	14.35	63.0486	2.06093	0.229874	5.10449	3.31686e-07	4.95839e-06
SOX11	6.21747	0.0687107	9.29185	3.26756	1.02979	5.1043	3.32028e-07	4.96087e-06
CACNA1S	15.9441	47.4292	0.201588	-5.33286	1.79776	-5.10392	3.32696e-07	4.96821e-06
SH3RF3	13.1641	1.71005	18.8911	2.87573	0.429461	5.10365	3.33156e-07	4.97245e-06
PEAR1	5.00207	5.70965	4.64828	-0.248425	0.491826	-5.10288	3.34519e-07	4.99014e-06
HSPA6	0.828195	2.01326	0.235665	-1.28604	0.966242	-5.1025	3.35191e-07	4.99536e-06
DENND2C	6.07485	11.9581	3.13322	-1.64851	0.734357	-5.10248	3.35223e-07	4.99536e-06
WDR73	28.3645	8.46389	38.3148	2.05457	0.275925	5.10067	3.3845e-07	5.04077e-06
NAT9	40.658	9.59782	56.1881	2.43195	0.247441	5.1	3.39662e-07	5.05615e-06
ALPK2	3.00194	8.61137	0.197231	-3.00504	1.44618	-5.09984	3.39936e-07	5.05756e-06
CLSTN1	72.2607	16.6301	100.076	2.51933	0.239529	5.0971	3.44903e-07	5.12794e-06
CASP2	11.9786	4.00999	15.9629	1.75951	0.206384	5.09703	3.45031e-07	5.12794e-06
USP2	19.6741	40.2798	9.37117	-1.99286	0.742706	-5.09651	3.4597e-07	5.13918e-06
CCDC14	39.5925	8.56062	55.1084	2.55304	0.285319	5.09356	3.51395e-07	5.21549e-06
BPGM	10.2475	10.9632	9.88961	-0.13565	0.293354	-5.09352	3.51477e-07	5.21549e-06
HMGCR	20.7168	7.42154	27.3645	1.75193	0.310769	5.09278	3.52853e-07	5.23315e-06
SEPT3	1.94307	0.0623827	2.88342	1.87002	0.851193	5.09222	3.53886e-07	5.24571e-06
CDCA4	8.80309	1.34902	12.5301	2.52604	0.44489	5.09	3.58057e-07	5.30474e-06
ACOT13	15.9468	19.0484	14.396	-0.380933	0.310382	-5.08701	3.63754e-07	5.38474e-06
RPGRIP1L	5.7055	1.19062	7.96295	2.03264	0.335935	5.08697	3.63839e-07	5.38474e-06
CDH22	7.55707	0.378299	11.1464	3.13957	0.820299	5.08537	3.66913e-07	5.42738e-06
IGSF3	5.39962	0.499616	7.84962	2.56102	0.491213	5.08467	3.68263e-07	5.4445e-06
PLEKHA2	4.18129	6.15222	3.19583	-0.769436	0.428624	-5.08383	3.69906e-07	5.46592e-06
TMEM67	28.2268	2.70744	40.9865	3.50143	0.452086	5.08284	3.71841e-07	5.49162e-06
DTNBP1	13.6744	12.1172	14.453	0.236429	0.201844	-5.08199	3.73502e-07	5.51326e-06
PDE7B	1.02043	1.64306	0.709111	-0.628962	0.526052	-5.0818	3.73876e-07	5.51589e-06
FBXO48	0.962636	1.00028	0.943815	-0.0413109	0.3003	-5.08141	3.74646e-07	5.52437e-06
KCNA1	5.84424	0.17372	8.67949	3.04384	0.895105	5.07998	3.77468e-07	5.56307e-06
SOX15	11.8912	0.885998	17.3938	3.28582	0.647885	5.07973	3.77977e-07	5.56764e-06
SH3BGR	39.4989	92.3109	13.0929	-2.72707	0.939074	-5.078	3.81425e-07	5.61551e-06
SLIT1	9.28832	0.127001	13.869	3.72175	1.22176	5.07728	3.82884e-07	5.63277e-06
CYP17A1	5.07795	10.0707	2.58156	-1.62809	0.646447	-5.07722	3.82998e-07	5.63277e-06
CRISPLD2	5.45171	6.85578	4.74967	-0.450275	0.414538	-5.07707	3.833e-07	5.63428e-06
MRC1	2.8857	6.5284	1.06435	-1.86666	0.652302	-5.0768	3.83854e-07	5.63947e-06
C4orf47	8.75191	0.540948	12.8574	3.16876	0.695543	5.07349	3.90579e-07	5.73184e-06
PRND	7.73492	0.058774	11.573	3.56986	1.16548	5.07338	3.9081e-07	5.73184e-06
MAPK14	19.5186	15.1893	21.6833	0.486596	0.124088	-5.07334	3.90885e-07	5.73184e-06
UBE2S	41.7294	3.21023	60.989	3.88004	0.483216	5.07331	3.90955e-07	5.73184e-06
TRIM50	0.230514	0.631424	0.0300585	-0.663406	1.08257	-5.07091	3.9591e-07	5.80146e-06
ASB12	3.77946	10.0378	0.650302	-2.74165	1.12809	-5.07069	3.96377e-07	5.80529e-06
ARHGAP30	2.13387	4.11078	1.14541	-1.25229	0.621139	-5.07053	3.96701e-07	5.80662e-06
FOXF2	11.887	0.752205	17.4544	3.39672	0.668573	5.07045	3.9688e-07	5.80662e-06
SASH1	10.2378	19.0205	5.84645	-1.54805	0.513568	-5.07017	3.97468e-07	5.8122e-06
HTATSF1	43.1684	45.3652	42.07	-0.10636	0.330667	-5.06865	4.00646e-07	5.85563e-06
ZDHHC15	7.14606	1.95531	9.74143	1.86181	0.345589	5.06732	4.03453e-07	5.89359e-06
GATM	12.0252	28.0647	4.00544	-2.5377	0.900629	-5.06469	4.09058e-07	5.97237e-06
C2CD4C	14.174	0.374078	21.074	4.00581	0.76753	5.06409	4.10354e-07	5.98819e-06
CDC25C	3.45207	0.089974	5.13311	2.49233	0.84574	5.06217	4.14516e-07	6.04579e-06
TMED3	49.2767	8.68239	69.5738	2.8657	0.379711	5.06131	4.16388e-07	6.06906e-06
CD74	214.815	416.638	113.903	-1.86184	0.562229	-5.06118	4.16666e-07	6.06906e-06
SPIRE2	10.3419	1.53125	14.7472	2.63717	0.380727	5.06114	4.16757e-07	6.06906e-06
CD22	0.816658	1.43086	0.509557	-0.687341	0.665591	-5.06004	4.19173e-07	6.10108e-06
ASCC2	39.5655	30.793	43.9518	0.499667	0.169591	-5.05958	4.2019e-07	6.11273e-06
AKAP6	4.68051	10.4895	1.77602	-2.04923	0.925264	-5.0592	4.21023e-07	6.12168e-06
COL11A2	23.9617	0.577565	35.6538	4.53819	0.879323	5.05864	4.22266e-07	6.13659e-06
ECEL1	53.0492	0.313286	79.4171	5.93625	1.29767	5.05749	4.24801e-07	6.17024e-06
PRG4	2.60644	6.37846	0.720435	-2.10055	0.916695	-5.05622	4.27639e-07	6.20826e-06
CHRNG	1.50943	3.88197	0.323163	-1.88347	1.22175	-5.05285	4.35273e-07	6.31453e-06
AKR1B1	56.7306	87.0066	41.5926	-1.04701	0.537563	-5.05279	4.35407e-07	6.31453e-06
LIN7A	0.571697	1.12151	0.296789	-0.71015	0.772928	-5.0522	4.36755e-07	6.33082e-06
HCCS	11.8472	14.0544	10.7436	-0.358314	0.420376	-5.05082	4.39928e-07	6.37353e-06
MRPL16	35.8386	32.7058	37.405	0.188299	0.27156	-5.05034	4.41034e-07	6.38626e-06
C19orf47	17.9075	40.2227	6.74989	-2.41119	0.568005	-5.04973	4.42432e-07	6.40321e-06
PDZD4	37.3675	2.21701	54.9428	4.12016	0.574153	5.047	4.48795e-07	6.49154e-06
SERP2	9.85532	1.14306	14.2115	2.82741	0.44416	5.04692	4.48996e-07	6.49154e-06
KIFC2	67.7198	5.92325	98.618	3.84689	0.581846	5.04571	4.51833e-07	6.52689e-06
LRP3	9.75286	14.4997	7.37945	-0.88731	0.400664	-5.04568	4.51904e-07	6.52689e-06
SGO1	1.84533	0.0972847	2.71935	1.76111	0.795406	5.04487	4.5384e-07	6.54871e-06
B2M	266.396	490.084	154.552	-1.65857	0.524779	-5.04485	4.5388e-07	6.54871e-06
ATP1B2	14.9341	1.76264	21.5198	3.02708	0.409571	5.04316	4.57905e-07	6.60339e-06
SERPINB1	10.9521	16.1856	8.33529	-0.880432	0.413347	-5.04254	4.59388e-07	6.6214e-06
ADAMTS17	18.4579	1.40663	26.9835	3.53949	0.687565	5.04145	4.62009e-07	6.65577e-06
TPO	0.467341	1.19998	0.101021	-0.998649	1.28676	-5.04114	4.62773e-07	6.66336e-06
CPSF1	88.6694	18.632	123.688	2.66704	0.263519	5.03972	4.66221e-07	6.70958e-06
EEA1	5.14221	6.11831	4.65416	-0.332224	0.315626	-5.03883	4.6838e-07	6.73721e-06
HHATL	46.7011	130.361	4.8711	-4.48376	1.38665	-5.03704	4.72787e-07	6.79713e-06
PIK3CB	9.54021	11.0724	8.77412	-0.304672	0.309358	-5.03535	4.76973e-07	6.85382e-06
PSMD2	97.0614	77.0182	107.083	0.470256	0.27904	-5.03446	4.79196e-07	6.88224e-06
SDC4	16.9325	24.3793	13.2091	-0.836833	0.434569	-5.03215	4.85013e-07	6.96223e-06
EPM2A	13.3833	19.1354	10.5073	-0.807178	0.54587	-5.03054	4.89097e-07	7.01729e-06
AC022415.1	5.04107	0.542301	7.29045	2.42637	0.490566	5.03005	4.90346e-07	7.03162e-06
MTMR11	44.4025	4.77557	64.216	3.49719	0.457003	5.0296	4.91502e-07	7.04461e-06
TNFRSF8	0.308052	0.769701	0.0772277	-0.716182	0.887782	-5.02921	4.92497e-07	7.05528e-06
XIRP2	87.5184	262.059	0.247973	-7.71966	2.28682	-5.02812	4.95308e-07	7.09195e-06
ACADVL	504.58	520.165	496.788	-0.0662083	0.47015	-5.02621	5.00255e-07	7.15914e-06
ECI1	26.3392	39.2507	19.8834	-0.946657	0.493581	-5.02612	5.00511e-07	7.15916e-06
HIST1H4I	24.7377	2.00385	36.1046	3.62671	0.614988	5.02595	5.00942e-07	7.16169e-06
SLC22A31	17.6793	0.339765	26.3491	4.35144	1.07516	5.02443	5.04921e-07	7.21492e-06
PRDX5	203.79	181.606	214.882	0.24151	0.23641	-5.02401	5.06045e-07	7.22731e-06
USP11	82.8681	16.9081	115.848	2.70595	0.253492	5.02305	5.08584e-07	7.25988e-06
FERMT3	6.24024	11.9914	3.36464	-1.57363	0.634184	-5.02205	5.11227e-07	7.29393e-06
FNDC10	6.16415	0.436085	9.02818	2.80385	0.639265	5.02166	5.12279e-07	7.30523e-06
TMSB15B	9.23772	1.13774	13.2877	2.74061	0.526175	5.02098	5.14098e-07	7.32746e-06
ICMT	28.3532	30.0637	27.4979	-0.124372	0.337195	-5.01934	5.18487e-07	7.38385e-06
ANGPTL4	20.3464	53.3776	3.83082	-3.49267	0.95909	-5.01931	5.18579e-07	7.38385e-06
PSMB6	103.619	112.897	98.98	-0.188016	0.341456	-5.01761	5.23176e-07	7.44554e-06
EPSTI1	1.72451	3.22404	0.974746	-1.09696	0.667201	-5.01714	5.2445e-07	7.45991e-06
ASGR1	10.2172	1.51992	14.5658	2.62693	0.501233	5.01582	5.28072e-07	7.50763e-06
NAALADL1	19.5839	4.60839	27.0716	2.32345	0.350598	5.01485	5.30749e-07	7.54189e-06
HIPK2	7.8286	10.4155	6.53517	-0.599276	0.360132	-5.0145	5.31707e-07	7.55001e-06
PSMC2	57.695	54.0676	59.5087	0.135939	0.247452	-5.01445	5.31857e-07	7.55001e-06
STRADA	74.7113	14.9535	104.59	2.72653	0.310243	5.01413	5.3274e-07	7.55874e-06
CYLD	8.69171	9.10224	8.48644	-0.0907373	0.225084	-5.01371	5.33904e-07	7.57143e-06
LYRM1	32.2001	41.6653	27.4675	-0.583746	0.324939	-5.01197	5.38749e-07	7.63631e-06
TTLL5	13.7191	4.16789	18.4948	1.91544	0.213781	5.01085	5.419e-07	7.6771e-06
KBTBD13	0.848344	2.4755	0.034764	-1.74792	1.56005	-5.01028	5.43508e-07	7.69601e-06
SH3D21	7.79584	0.799548	11.294	2.77225	0.501501	5.00898	5.4719e-07	7.74425e-06
AQP7P1	1.99813	5.85152	0.071434	-2.67688	1.40808	-5.00836	5.48946e-07	7.7652e-06
MUTYH	45.228	7.85842	63.9128	2.87338	0.268457	5.00811	5.49684e-07	7.77173e-06
ZDHHC14	2.88555	2.56524	3.0457	0.182389	0.307311	-5.00724	5.52147e-07	7.80264e-06
PGPEP1	8.16503	8.43799	8.02855	-0.0639854	0.378293	-5.00458	5.59839e-07	7.90738e-06
COBL	7.82276	21.2187	1.12479	-3.38638	1.08581	-5.00412	5.61167e-07	7.92216e-06
DNAJB5	12.8623	23.9575	7.31474	-1.58573	0.690479	-5.00342	5.63216e-07	7.9471e-06
ADAMTSL5	2.986	5.77532	1.59134	-1.38659	0.876365	-5.00321	5.63832e-07	7.95181e-06
GSTA4	75.5986	18.7157	104.04	2.41352	0.194996	5.00177	5.68076e-07	8.00765e-06
EPB42	0.485166	1.4555	0	-1.29602	1.67716	-5.00167	5.68366e-07	8.00773e-06
[truncated: 26,494 more rows]
