# Supplementary material for: Development of synovial sarcoma organoids exhibiting ferroptosis resistance despite low malic enzyme 1 expression
Source: Sci Rep. 2025 Dec 21;16:2369. doi: 10.1038/s41598-025-32030-w (PMC12816075; doi:10.1038/s41598-025-32030-w)
Supplement: Supplementary file 3 — Supplementary Material 3 [file 41598_2025_32030_MOESM3_ESM.xlsx]

## Sheet: Table S3
		Cluster	OICISS891_N	OICISS935_N	OICISS1253_N	OICISS891_T	OICISS935_T	OICISS1253_T	OICISS891_ODX	OICISS935_ODX	OICISS1253_ODX
ENSG00000129824	RPS4Y1	A	-2.64748	2.70254	-3.04755	-2.77117	6.65639	-2.42729	-2.21456	6.34688	-2.59776
ENSG00000243423		A	-1.94702	-3.2201	-3.2201	-3.2201	-2.08556	-1.83808	6.41621	5.07792	4.03683
ENSG00000235817		A	-2.55	-2.55	-2.55	-2.55	-2.55	-2.55	6.22295	5.09098	3.98605
ENSG00000197744	PTMAP2	A	-2.38979	-2.38979	-2.38979	-2.38979	-2.38979	-2.38979	5.8217	4.68457	3.83246
ENSG00000244398		A	0.927007	-1.14495	1.96314	-5.79892	3.56831	2.68815	0.777233	2.81894	-5.7989
ENSG00000230204	FTH1P5	A	-2.53175	-2.23056	-2.02149	-2.10185	-2.53175	-2.53175	5.44483	4.71485	3.78946
ENSG00000236191	RPS15AP25	A	-2.28092	-2.28092	-2.28092	-2.28092	-2.28092	-2.28092	5.75134	4.57394	3.36022
ENSG00000227739	TUBB	A	-3.77009	-1.49047	1.66613	-4.65735	3.06999	3.14766	-3.95995	2.93658	3.0575
ENSG00000229230	MT1P3	A	-2.06017	-2.06017	-2.06017	-2.06017	0.310387	-2.06017	5.19784	6.29533	-1.5027
ENSG00000239527	RPS23P7	A	-2.19903	-2.19903	-2.19903	-2.19903	-1.75074	-2.19903	5.75973	4.07215	2.914
ENSG00000233697	HLA-DRB8	A	-2.17673	-2.17673	-2.17673	-2.17673	-2.00263	-2.17673	4.86676	4.11864	3.90087
ENSG00000284660		A	-1.59594	-1.59594	-1.59594	-1.59594	5.69875	-1.59594	-1.59594	5.47285	-1.59594
ENSG00000242675	RPS16P9	A	-0.768618	-1.67532	-1.67532	-1.67532	-1.67532	-1.67532	6.04761	4.77292	-1.67532
ENSG00000233929	MT1XP1	A	-1.03079	-1.65674	-3.39894	-1.08117	-3.39894	-0.912786	4.747	4.31002	2.42234
ENSG00000236571		A	-2.02488	-2.02488	-2.02488	-2.02488	-2.02488	-2.02488	4.97835	3.72463	3.44633
ENSG00000217644		A	-1.70899	-1.83399	-2.41189	-2.41189	-1.56371	-1.97927	5.27801	3.89399	2.73775
ENSG00000125740	FOSB	A	-0.809936	-3.28571	0.620881	-4.06916	1.10814	-3.34741	3.93012	2.50813	3.34494
ENSG00000271159	HINT1P2	A	-2.22321	-2.22321	-2.22321	-0.612021	-2.22321	-2.22321	4.63861	4.3101	2.77935
ENSG00000121005	CRISPLD1	A	-3.75557	-3.65253	-3.13631	0.402838	4.39253	1.2698	-0.253069	3.64273	1.08958
ENSG00000235439	DDX39B	A	-3.73036	-1.35438	1.69896	-3.73039	2.56627	3.04795	-3.42675	2.39131	2.53739
ENSG00000226718	SNRPGP8	A	-1.96994	-1.96994	-1.96994	-1.96994	-1.96994	-1.96994	4.92829	3.98626	2.90512
ENSG00000216519		A	-1.93833	-1.93833	-1.93833	-1.93833	-1.93833	-1.93833	4.97524	3.65672	2.998
ENSG00000213486		A	-2.07883	-2.07883	-2.07883	-1.71162	-2.07883	-1.44884	5.03853	3.92313	2.51413
ENSG00000271134	IFITM3P9	A	-1.90831	-1.90831	-1.90831	-1.90831	-1.90831	-1.90831	5.10587	3.49073	2.85327
ENSG00000154645	CHODL	A	-2.06565	-2.53456	-2.33614	-1.98491	4.90874	1.37238	-1.88952	4.29336	0.236296
ENSG00000233558		A	-1.89262	-1.89262	-1.89262	-1.89262	-1.89262	-1.89262	5.0519	3.66932	2.63451
ENSG00000234442		A	-1.79003	-1.79003	-1.79003	-1.79003	5.05296	0.949601	-1.79003	4.58912	-1.64153
ENSG00000235071		A	-1.9114	-1.9114	-1.9114	-1.9114	-1.9114	-1.72815	4.70125	3.98831	2.59559
ENSG00000106511	MEOX2	A	-2.31531	-2.34703	-0.606861	-3.06428	4.32757	2.49673	-2.71725	3.40013	0.826299
ENSG00000248448	COX5BP1	A	-1.93057	-1.93057	-1.93057	-1.93057	-1.37532	-1.93057	4.44953	4.3418	2.23685
ENSG00000180818	HOXC10	A	-3.75318	-1.87546	1.3546	-2.32493	2.50654	2.38869	-3.47704	2.50865	2.67214
ENSG00000171772	SYCE1	A	-2.36199	-2.35646	-2.26395	2.93253	3.27693	-1.9811	2.37945	3.03395	-2.65937
ENSG00000235673		A	-1.87369	-1.87369	-1.87369	-1.87369	-1.6435	-1.58046	4.806	3.636	2.27673
ENSG00000243979		A	-1.69339	-2.0535	-2.0535	-2.0535	-1.41272	-1.34654	4.8039	3.51067	2.29859
ENSG00000254112		A	-2.37679	-2.37679	-1.15137	-1.3999	-2.37679	-0.761304	4.27208	4.05686	2.114
ENSG00000229194	HLA-V	A	-2.30976	-2.33958	-1.97636	-0.489041	-2.44306	-0.896848	4.35704	3.40023	2.69737
ENSG00000214484	RPSAP28	A	-1.79652	-1.79652	-1.79652	-1.79652	-1.62732	-1.79652	4.75733	3.58971	2.2629
ENSG00000229338	NME2P3	A	-1.77345	-1.77345	-1.77345	-1.77345	-1.77345	-1.77345	4.46238	3.92647	2.25184
ENSG00000165496	RPL10L ENSG00000165496	A	-1.75709	-1.75709	-1.75709	-1.75709	-1.75709	-1.75709	4.68397	3.47166	2.38694
ENSG00000234975	FTH1P2	A	-1.59895	-2.61002	0.0343851	-2.61002	-1.41746	-1.96451	4.23339	3.4432	2.49
ENSG00000275428		A	-2.58033	-3.0961	-1.55028	-2.32829	3.29926	2.70654	-1.57567	2.34572	2.77916
ENSG00000254305	MRPL9P1	A	-1.48374	-1.54505	-1.3712	-1.79713	4.83733	-1.45123	-1.58234	4.44066	-0.0473036
ENSG00000226112	FCF1P4	A	-1.77104	-1.77104	-1.77104	-1.77104	-1.77104	-1.77104	4.15569	3.51503	2.95552
ENSG00000198618	PPIAP22	A	-2.55993	-2.55993	-1.72758	-0.348535	-1.2047	-1.77168	4.24455	3.42224	2.50557
ENSG00000232960	CSNK2B	A	-0.876222	1.33778	-2.15146	-0.825879	4.288	-2.15146	-2.15146	4.25936	-1.72867
ENSG00000230037	UBBP1	A	-1.73072	-1.73072	-1.73072	-1.73072	-1.73072	-1.73072	4.48668	3.57111	2.32652
ENSG00000230384	RPSAP25	A	-1.59406	-1.69311	-1.69311	-1.69311	-1.69311	-1.69311	4.96356	3.4854	1.61067
ENSG00000240388		A	-1.68911	-1.68911	-1.68911	-1.68911	-1.68911	-1.68911	4.70384	3.44096	1.98983
ENSG00000231115	RING1	A	-2.87263	-1.49362	0.332431	-2.87263	1.12861	3.56353	-2.87263	1.91647	3.17047
ENSG00000255749	GNAI2P1	A	-1.71996	-1.71996	-1.71996	-1.71996	-1.71996	-1.71996	4.21006	3.07046	3.03923
ENSG00000182107	TMEM30B ENSG00000182107	A	-3.88985	-3.8609	-0.346487	-0.112234	3.44281	1.47062	-0.717469	2.82287	1.19064
ENSG00000196565	HBG2	A	-2.05506	3.24391	-2.31831	-1.81478	-1.7787	-2.01636	4.582	1.08344	1.07387
ENSG00000244485	RPL18P13	A	-1.67438	-1.67438	-1.67438	-1.67438	-1.67438	-1.67438	4.68758	3.26032	2.09835
ENSG00000230807		A	-2.06485	-2.06485	-1.10912	-1.30155	-1.4474	-2.06485	4.3582	3.0621	2.63231
ENSG00000234371	RPSAP31	A	-1.77918	-1.77918	-1.77918	-1.02568	-1.77918	-1.77918	4.58084	3.10139	2.23936
ENSG00000270313	COX6CP16	A	-1.69031	-1.69031	-1.69031	-1.69031	-1.69031	-1.69031	3.99135	3.50554	2.64498
ENSG00000243648	ENSG00000243648	A	-1.41035	-1.83955	-1.83955	-1.83955	-1.17284	-1.83955	4.44773	3.12286	2.3708
ENSG00000134184	GSTM1	A	-2.65069	-2.65069	2.59807	-2.65069	-2.65069	2.49603	1.71704	1.31411	2.47748
ENSG00000164303	ENPP6 ENSG00000164303	A	-2.33375	-2.58531	-2.75696	-1.09814	4.13481	1.67734	-0.703929	3.18464	0.481311
ENSG00000144355	DLX1	A	-2.61606	-2.61606	-2.61606	-0.670172	3.0076	3.00137	-1.80502	2.24325	2.07116
ENSG00000275691	MT1IP	A	-1.62423	-1.62423	-1.62423	-1.62423	-1.62423	-1.62423	3.91762	4.15719	1.67058
ENSG00000234475	HSPA1A	A	-3.03999	3.56997	0.919213	-2.99045	1.23783	0.585993	-3.45356	1.56231	1.60869
ENSG00000145423	SFRP2	A	-3.57592	-3.39995	-1.46519	-0.901841	3.41166	0.79874	0.903896	2.87992	1.34869
ENSG00000092969	TGFB2	A	-2.44267	-3.26203	-1.69354	-0.453556	3.23405	2.32229	-1.79695	3.22372	0.868691
ENSG00000244073	RPS4XP6	A	-1.68202	-1.90079	-1.90079	-1.64133	-1.39144	-1.1067	4.49963	3.05418	2.06924
ENSG00000233597		A	-1.42686	-2.30352	-2.34394	-1.63281	-0.819272	-1.04725	4.17699	3.15454	2.24212
ENSG00000164920	OSR2	A	-1.81877	-2.82768	1.29265	-2.7211	3.4685	-0.149851	-1.06983	3.85806	-0.031976
ENSG00000170345	FOS	A	0.537667	-1.24667	-2.75019	-2.84652	1.61436	-2.92131	2.67331	2.09474	2.84461
ENSG00000091656	ZFHX4	A	-1.4088	-2.27875	-0.568081	-1.5457	4.46097	-0.682447	-1.78719	3.83513	-0.0251295
ENSG00000270598		A	-1.49868	-1.49868	-1.49868	-1.49868	-1.49868	-1.49868	4.13464	4.05286	0.804574
ENSG00000127863	TNFRSF19	A	-1.9881	-2.7486	-0.665737	-1.0655	4.23207	-0.480095	-1.79446	3.10962	1.40081
ENSG00000260548	NA	A	-1.8307	-1.8307	-1.3462	-1.10385	4.52051	-0.0275062	-1.19731	3.61995	-0.8042
ENSG00000181524	RPL24P4	A	-2.36657	-2.36657	-1.08973	-0.697528	-1.50802	-0.981263	4.04668	3.00007	1.96293
ENSG00000067048	DDX3Y ENSG00000067048	A	-2.00969	-0.0783956	-2.04106	-1.96441	3.9916	-1.97129	1.1287	3.38046	-0.435911
ENSG00000236391		A	-1.46598	-1.46598	-1.46598	-1.46598	-1.46598	-1.46598	4.29081	3.49318	1.01192
ENSG00000136960	ENPP2	A	-2.91654	-1.91225	2.85492	-2.30482	3.74887	0.566519	-0.708679	1.61654	-0.944565
ENSG00000220131		A	-1.61882	-1.61882	-1.61882	-1.61882	-0.944264	-1.61882	4.10756	3.10633	1.82446
ENSG00000233838	DPH3P1	A	-1.50532	-1.50532	-1.50532	-1.50532	-1.50532	-1.50532	3.6156	3.82159	1.59471
ENSG00000228453	RPS15AP9	A	-1.51433	-1.51433	-1.51433	-1.51433	-1.51433	-1.51433	4.21459	2.85955	2.01184
ENSG00000151617	EDNRA	A	-2.63148	-2.50772	-0.414658	-0.946789	2.89052	3.13288	-2.50074	1.82737	1.15063
ENSG00000230118		A	-1.50072	-1.50072	-1.50072	-1.50072	-1.50072	-1.50072	4.17095	2.86325	1.9701
ENSG00000226781	TBCAP1	A	-1.49947	-1.49947	-1.49947	-1.49947	-1.49947	-1.49947	4.05171	2.97098	1.9741
ENSG00000285132		A	2.35655	-1.9312	-1.9312	1.89727	2.54285	-1.9312	-1.9312	2.85932	-1.9312
ENSG00000256843	ENSG00000256843	A	-1.15013	-1.15013	-1.15013	-1.15013	-1.15013	-1.15013	3.52424	4.52665	-1.15013
ENSG00000270762	FXYD6P1	A	-1.64313	-1.64313	-1.64313	-1.64313	-0.020116	-1.64313	3.58793	3.90235	0.745494
ENSG00000213303		A	-1.09251	-2.1633	-1.30567	-1.47526	-1.61557	-1.00987	4.33314	2.69493	1.63411
ENSG00000089225	TBX5	A	-1.93911	-2.29624	-1.08249	-1.11705	4.10911	1.30911	-1.93661	2.77964	0.173632
ENSG00000206286	VPS52	A	1.65889	-0.648124	-2.72161	2.8044	1.18927	-2.72161	2.54471	0.615671	-2.72161
ENSG00000121089	NACA3P	A	-1.72901	-1.72901	-1.72901	-1.39086	-0.763804	-1.40886	3.99752	2.95335	1.79969
ENSG00000150051	MKX	A	-2.28035	-2.10564	-0.756896	-1.98713	2.16094	3.3638	-1.70907	0.509452	2.80489
ENSG00000235758	AGPAT1	A	0.850831	-0.88499	-3.08756	2.57222	2.15926	-3.07427	1.85203	1.51298	-1.90051
ENSG00000278275		A	-2.36771	-2.36771	-0.526422	-2.36771	2.73548	2.1821	-1.20758	3.08109	0.838447
ENSG00000134013	LOXL2	A	-3.4769	-3.37081	-0.0197394	-0.0543844	2.95098	1.53184	-0.527118	2.41583	0.550302
ENSG00000166292	TMEM100	A	-2.16652	-2.13559	0.900285	-2.45771	2.43754	2.07451	-2.57011	1.8033	2.11429
ENSG00000179388	EGR3	A	-2.0817	-2.6561	0.299574	-2.08164	3.02089	-2.12125	2.19881	2.22172	1.19971
ENSG00000142178	SIK1	A	-1.49438	-3.15327	-1.78576	1.14	-0.682691	-1.71648	3.3127	2.22855	2.15133
ENSG00000144909	OSBPL11	A	0.370926	-2.34363	-0.377866	-1.26712	4.36395	-0.928343	-1.47241	3.00532	-1.35084
ENSG00000230685	CLIC1	A	-0.90799	-2.09568	-2.09568	2.53085	2.15924	-2.09568	2.62911	1.97143	-2.09561
ENSG00000235449		A	0.686123	-1.60649	-1.60649	-1.60649	1.31116	-1.60649	4.86585	-1.60649	1.16932
ENSG00000271687	MTND5P10	A	-1.46196	-1.46196	-1.46196	-1.36128	-1.39003	-1.36966	3.89896	3.3593	1.24862
ENSG00000241346	SNRPCP11	A	-3.05635	-3.05635	-0.842092	-0.263619	4.06672	-0.0390512	0.93863	1.7083	0.543815
ENSG00000233839		A	-1.43319	-1.43319	-1.43319	-1.43319	-1.43319	-1.43319	4.00114	2.98719	1.61083
ENSG00000235587	GAPDHP65	A	-1.42468	-1.42468	-1.42468	-1.42468	-1.42468	-1.42468	2.91887	4.06927	1.55993
ENSG00000180806	HOXC9	A	-3.04794	-1.16721	0.737172	-2.70881	2.72503	1.25205	-1.90945	2.12401	1.99516
ENSG00000183496	MEX3B	A	-2.6882	-2.91322	-2.00469	-0.20813	2.9449	1.77183	-0.682445	2.35987	1.42007
ENSG00000007062	PROM1	A	-2.05493	-2.21968	-2.42136	-0.941602	3.88962	0.634831	-0.380523	2.66898	0.824664
ENSG00000238008	COX6CP10	A	-0.72528	-3.78373	-1.77505	-0.783315	-0.938007	0.909246	3.11318	2.77367	1.20929
ENSG00000147257	GPC3	A	-2.47547	-1.16454	2.63865	-1.70469	-3.25076	0.881653	2.72523	1.41802	0.931905
ENSG00000241030	RPL29P24	A	-1.1249	-1.57041	-1.60582	-1.33107	-1.52578	-1.34841	3.92626	2.87226	1.70788
ENSG00000128918	ALDH1A2	A	-1.81828	-2.53989	-0.205937	-2.22565	3.1254	2.38273	-1.30581	2.62307	-0.0356312
ENSG00000215113	CXorf49B	A	-1.56851	-1.2564	-1.03926	-1.12597	4.05203	-0.548099	-1.30322	3.60798	-0.818552
ENSG00000213864	EEF1B2P2	A	-1.40217	-1.40217	-1.40217	-1.40217	-1.40217	-1.40217	4.04651	2.69899	1.6675
ENSG00000274665	PVALB	A	0.532026	-1.41164	-1.41164	-0.882459	-1.41164	-0.259052	0.25439	5.49689	-0.906863
ENSG00000225712	ATP5MC2P1	A	-1.42439	-1.42439	-1.42439	-1.42439	-1.42439	-1.42439	3.76535	2.82423	1.95678
ENSG00000234017		A	-1.58575	-1.58575	-1.58575	-0.0377037	-1.58575	-1.58575	3.95919	2.89571	1.11156
ENSG00000224864		A	-1.5711	-1.20997	-1.5711	-0.833345	-1.5711	-1.5711	2.87817	1.5631	3.88643
ENSG00000228964	HLA-B	A	-1.00156	1.06313	-3.18871	-0.279833	-0.0178718	-3.18871	2.84307	2.0998	1.67067
ENSG00000221818	EBF2	A	-1.95086	-2.45508	-0.932235	-1.63232	2.01596	3.12773	-1.86851	2.20294	1.49238
ENSG00000145685	LHFPL2	A	-2.79709	-3.12791	0.837894	-0.981485	2.89337	2.32596	-1.26934	1.5858	0.532814
ENSG00000197582	GPX1P1	A	-1.68325	-1.68325	-1.68325	-0.770053	-1.17479	-1.33169	3.6381	3.014	1.6742
ENSG00000116741	RGS2	A	-2.56583	-1.57498	-0.28609	-2.06385	3.98827	0.645931	-1.4104	1.93786	1.32907
ENSG00000269378	ITGB1P1	A	-3.21348	-1.18164	2.81023	-3.21346	0.727043	0.894299	2.08628	1.24719	-0.156464
ENSG00000091972	CD200	A	-1.72702	-2.19865	0.239022	-0.612072	3.70767	0.933804	-3.04738	2.18366	0.520965
ENSG00000240210		A	-1.42192	-1.42192	-1.42192	-1.16409	-1.42192	-1.42192	3.9536	2.65862	1.66146
ENSG00000235686	PPIAP20	A	-2.22831	-2.22831	-2.22831	-2.22831	1.79181	2.47008	1.40478	2.12546	1.1211
ENSG00000223532	HLA-B	A	-0.188593	2.16912	-0.885598	1.83232	3.1032	-2.82934	-0.876804	0.685631	-3.00994
ENSG00000226788	RING1	A	-2.23858	0.494881	2.50681	-2.23858	3.01454	-1.65308	-2.23858	1.09372	1.25887
ENSG00000181234	TMEM132C	A	-2.73985	-3.15072	2.37811	-1.38604	2.31219	1.42107	-1.04559	1.38822	0.822614
ENSG00000276032	NA	A	-2.63661	-2.35935	-1.0935	0.687446	4.0322	0.740857	-0.332491	1.98129	-1.01984
ENSG00000251630		A	-1.35615	-1.35615	-1.35615	-1.35615	-1.35615	-1.35615	4.08687	2.06655	1.98349
ENSG00000198692	EIF1AY	A	-1.79135	2.90146	-1.9189	-1.45311	2.67597	-1.67726	0.687434	2.25665	-1.68088
ENSG00000226870		A	-1.08292	-1.08292	-1.08292	-1.08292	4.55834	-0.774017	-1.08292	2.71321	-1.08292
ENSG00000262986	SMIM10L1	A	-2.19253	-2.19253	-2.19253	-0.197014	-0.00493084	0.26104	3.3776	3.13445	0.00644423
ENSG00000120738	EGR1	A	-0.771617	-2.46023	-0.352667	-2.41239	2.00158	-2.35598	2.40802	2.07483	1.86844
ENSG00000242209	RPL32P12	A	-1.37885	-1.37885	-1.37885	-1.37885	-1.37885	-1.37885	3.63149	2.71127	1.93033
ENSG00000185594	SPATA8	A	-1.76299	-1.76299	-1.76299	2.34684	2.73245	-1.76299	1.88023	1.85545	-1.76299
ENSG00000276886	GREM1	A	-0.981515	-2.03073	-0.907385	-1.64326	1.61157	3.38461	-2.35021	0.237335	2.67959
ENSG00000269981		A	-1.94004	-1.94004	-0.471199	-1.94004	3.19277	0.838682	-1.94004	2.52625	1.67365
ENSG00000203805	PLPP4	A	-2.04933	-1.93679	-0.968869	-1.45103	3.4053	1.93123	-1.79805	0.558278	2.30927
ENSG00000253250	C8orf88	A	-2.93486	-2.14321	0.0583645	-0.431516	1.95537	0.272244	-0.501073	4.16429	-0.439616
ENSG00000250580	SNRPCP8	A	-1.31325	-1.31325	-1.31325	-1.31325	-1.31325	-1.31325	3.88804	2.87671	1.11472
ENSG00000218582	GAPDHP63	A	-1.39325	-1.39325	-1.39325	-1.39325	-1.11008	-1.39325	2.78976	3.69318	1.59338
ENSG00000153162	BMP6	A	-1.38724	-1.13763	0.905831	-1.68389	3.7559	-1.40073	-1.14961	3.0826	-0.985217
ENSG00000214578	HMGN2P15	A	-0.471726	-0.531893	1.68874	-3.73304	1.23046	2.24178	-2.80488	1.2743	1.10625
ENSG00000241838		A	-1.27482	-1.30342	-1.4174	-1.4174	-1.293	-1.4174	3.06309	3.31163	1.74872
ENSG00000159556	ISL2	A	-1.84093	-1.84093	-0.974613	-1.48854	3.16879	-0.298383	-1.35078	3.2434	1.38198
ENSG00000123407	HOXC12 ENSG00000123407	A	-1.95446	-1.92068	-0.902986	-1.70971	2.97011	1.24262	-1.89686	2.23311	1.93886
ENSG00000131002	TXLNGY	A	-1.27162	0.598154	-1.289	-1.14292	3.90477	-1.23978	-1.25018	2.99448	-1.30391
ENSG00000179460	EEF1A1P27	A	-1.34674	-1.34674	-1.34674	-1.34674	-1.2239	-1.34674	3.86232	2.24646	1.84879
ENSG00000196205	EEF1A1P5	A	-2.82743	-3.02188	-0.988735	0.105929	0.611628	-0.301898	3.04487	2.12456	1.25296
ENSG00000239927	RPP21	A	-1.34591	1.90783	-1.34591	-1.34591	3.12798	-1.34591	-1.34591	3.03967	-1.34591
ENSG00000153234	NR4A2	A	-2.07837	-2.54381	-1.04211	-0.4061	0.0778401	-1.0776	3.80508	1.34471	1.92035
ENSG00000283963		A	-0.482955	-2.42791	-1.76142	2.43237	2.86852	-2.42613	0.162091	1.91508	-0.279653
ENSG00000123388	HOXC11	A	-2.04193	-2.04193	-0.722132	-1.45167	2.86691	1.27679	-1.9447	2.30589	1.75277
ENSG00000254122	PCDHGB7	A	-1.03501	-1.25025	0.324498	-0.981785	3.72083	-0.798321	-1.59103	3.1359	-1.52482
ENSG00000164749	HNF4G	A	-1.58477	-1.61797	-1.61797	-1.53692	3.6799	-0.00787315	-0.84793	2.80491	0.728626
ENSG00000231344		A	-1.79481	-1.15059	-0.736829	-1.79481	-1.79481	-0.00144573	3.46662	2.87674	0.929951
ENSG00000254221	PCDHGB1	A	-1.9423	-1.91006	-1.65504	1.8075	2.71036	-1.87532	1.71429	2.1225	-0.971929
ENSG00000235377		A	-1.39425	-1.39425	-1.39425	-1.39425	-1.07667	-1.18027	3.5125	2.73732	1.58411
ENSG00000120875	DUSP4	A	-2.53958	-2.3303	3.14696	0.67559	2.26193	-1.45547	-0.262046	1.46117	-0.958253
ENSG00000264971	PRR13P4	A	-1.30932	-1.30932	-1.30932	-1.30932	-1.30932	-1.30932	3.67761	2.22414	1.95417
ENSG00000282995	FRG1EP	A	-1.14232	-0.649623	-0.692016	-1.14232	4.63095	-1.14232	-0.982477	2.08462	-0.964491
ENSG00000251142		A	-1.21643	-1.21643	-1.21643	-1.21643	4.38168	-1.21643	-1.21643	1.58115	1.33574
ENSG00000128573	FOXP2	A	-0.997058	-1.79093	-0.884624	-2.02126	-2.0438	3.21974	2.5686	1.08808	0.861259
ENSG00000123358	NR4A1	A	0.159634	-1.222	-1.27122	-3.01802	1.35654	-2.19389	2.40073	1.90311	1.88512
ENSG00000231965		A	-1.60873	-1.60873	-1.60873	-0.805326	-0.546342	-1.16849	3.82291	2.34573	1.1777
ENSG00000122176	FMOD	A	-1.45559	-1.3586	3.1437	-2.59201	2.30555	-0.960002	-1.41377	1.21467	1.11605
ENSG00000135111	TBX3	A	-1.00137	-2.09473	0.0377317	-1.67176	3.01309	1.37979	-2.74528	1.54378	1.53875
ENSG00000204366	ZBTB12	A	-1.63318	-1.80541	-2.09635	1.16784	2.59215	-0.123865	1.50913	2.48603	-2.09635
ENSG00000136997	MYC	A	-1.72792	-3.48475	0.665933	-1.46287	2.47271	1.10124	-0.852368	1.72455	1.56347
ENSG00000243746	EEF1A1P10	A	-1.33314	-1.33314	-1.33314	-1.1983	-1.06003	-1.33314	3.70177	2.22427	1.66486
ENSG00000235307	BRD2	A	-1.82703	-1.04643	-2.50806	0.456087	2.9203	-0.848197	0.600965	3.09676	-0.844387
ENSG00000158270	COLEC12	A	-2.68942	-2.77166	0.071886	-1.22571	2.44991	2.2831	-0.528437	1.1768	1.23353
ENSG00000285133		A	-1.63654	-0.58187	0.825213	-1.63654	-1.63654	0.193255	3.45419	-1.63654	2.65537
ENSG00000251285		A	-0.479609	-1.94194	-1.94194	-0.491981	-1.94194	-0.35906	3.44155	1.94029	1.77462
ENSG00000198563	DDX39B	A	-2.42099	-0.340715	0.828325	-2.42099	2.18919	1.70419	-2.42099	1.8214	1.06059
ENSG00000242364		A	-1.23496	-1.23496	-1.23496	-1.23496	-1.23496	-1.23496	3.31192	3.00923	1.08859
ENSG00000124343	XG	A	-1.3792	-1.27915	2.37446	-2.18763	2.61842	0.763714	-1.91545	2.03223	-1.02739
ENSG00000219986	BTF3P7	A	-1.34303	-1.34303	-0.735372	-1.34303	-1.34303	-1.34303	3.51015	2.46655	1.47384
ENSG00000284964		A	-1.408	-1.408	-1.408	-0.546017	-1.408	-1.39546	3.15601	2.39701	2.02047
ENSG00000230364	RPL4P3	A	-1.26342	-1.26342	-1.26342	-1.11937	-1.26342	-1.26342	3.61128	2.32484	1.50034
ENSG00000104332	SFRP1	A	-2.69927	-2.29886	1.84368	-1.15584	2.66049	-0.156067	0.0063591	2.2567	-0.457192
ENSG00000120075	HOXB5	A	-2.0359	-2.15564	-0.945937	-1.24439	1.99311	2.82096	-1.36608	1.79457	1.1393
ENSG00000127022	CANX	A	-2.81286	-1.83626	1.02056	-1.23035	1.88973	1.88968	-1.96168	1.55684	1.48436
ENSG00000114374	USP9Y ENSG00000114374	A	-1.29872	0.80384	-1.41645	-1.07999	3.72654	-1.05214	-1.08129	2.5326	-1.13438
ENSG00000176043		A	-1.19323	-1.19323	-1.19323	-1.19323	-1.19323	-1.19323	3.4736	2.82265	0.86312
ENSG00000231834	HLA-A	A	-1.43672	2.62898	-1.28043	-1.22989	3.23484	-1.32337	-1.43672	1.54836	-0.705038
ENSG00000235957	COX7CP1	A	-0.637786	-0.637786	-0.637786	-0.637786	-0.637786	-0.637786	5.10229	-0.637786	-0.637786
ENSG00000233564	PRR3	A	-1.92543	-1.44308	-0.629161	-1.92543	2.25862	2.14402	-1.92543	1.75324	1.69266
ENSG00000238151	MLLT10P1	A	-3.13035	-1.45181	0.12588	0.00187848	3.75142	0.610627	-0.159593	1.30651	-1.05456
ENSG00000126778	SIX1 ENSG00000126778	A	0.0541678	-2.3307	-1.29729	-1.56186	2.42847	2.03739	-2.26464	1.75039	1.18406
ENSG00000164694	FNDC1	A	-1.09181	-1.14246	-0.733311	-1.85055	3.29958	0.901514	-1.58653	2.84614	-0.642577
ENSG00000213553	RPLP0P6	A	-1.5361	-1.74373	-1.0455	-0.624509	-0.678236	-1.51068	3.52082	2.36319	1.25474
ENSG00000244731	C4A	A	-1.43103	-2.05575	-0.693187	-0.555006	-0.915342	-1.32829	3.00121	3.12647	0.850924
ENSG00000112852	PCDHB2	A	-2.07315	-2.13363	-0.538221	-1.22464	1.7143	2.46132	-1.75909	1.57057	1.98253
ENSG00000204389	HSPA1A	A	-1.64642	3.6563	-1.64634	-1.53344	1.63442	0.328111	-1.42213	1.53162	-0.902128
ENSG00000163638	ADAMTS9	A	-1.6216	-2.56367	-0.705027	-1.04316	2.3367	2.32473	-1.51721	2.1672	0.622035
ENSG00000172716	SLFN11	A	-1.5127	-1.80017	1.21089	-1.34812	1.25332	2.53637	-2.69757	0.169389	2.18859
ENSG00000110881	ASIC1	A	-2.02029	-2.94896	-1.38327	0.142973	2.99377	0.276148	0.172156	2.14124	0.62623
ENSG00000110900	TSPAN11	A	-2.03755	-2.01826	-0.784729	-1.01049	3.78151	0.342598	-0.443717	2.04901	0.121631
ENSG00000229132	EIF4A1P10	A	-1.23223	-1.23223	-1.23223	-1.07475	-1.11892	-1.23223	3.54026	2.49	1.09232
ENSG00000284969		A	3.2547	-0.978802	-1.42385	-1.99158	0.91999	-1.49552	2.26313	-1.35756	0.809476
ENSG00000229006	TRIM27	A	0.00160692	-0.912118	-2.10914	2.30746	2.18338	-2.10914	1.45833	1.28876	-2.10914
ENSG00000220105		A	-1.04124	-1.36139	-1.36139	-0.695041	-1.36139	-1.36139	3.40854	2.22643	1.54689
ENSG00000231878	SNRPFP1	A	-0.752403	0.388664	-0.752403	-0.752403	-0.752403	-0.752403	4.87815	-0.752403	-0.752403
ENSG00000089692	LAG3	A	-2.42824	-2.04361	-1.74714	-0.628221	1.57629	-0.531526	1.57295	2.25677	1.97271
ENSG00000154864	PIEZO2	A	-0.381181	-1.44158	-2.33669	-0.862962	3.35246	0.755563	-1.70124	2.05494	0.560693
ENSG00000089472	HEPH	A	-1.35271	-1.53876	-0.0629973	-1.72639	3.32036	0.184662	-1.26983	2.77217	-0.32651
ENSG00000235225	RPL31P17	A	-0.541762	-1.22885	-1.22885	-1.22885	-1.22885	-1.22885	3.72426	2.35568	0.606047
ENSG00000255690	TRIL	A	-1.46258	-2.44351	-1.17296	-0.714925	2.75475	1.23242	-1.45433	2.36192	0.899217
ENSG00000256045	MTRNR2L10	A	-0.218741	-0.349503	-1.09168	-1.46816	-1.69281	-1.82278	3.23872	2.59909	0.805879
ENSG00000233133		A	-1.40636	-1.40636	-1.40636	-0.0263959	-1.40636	-1.40636	2.13166	1.77851	3.148
ENSG00000133083	DCLK1	A	-1.47204	-1.63295	1.26599	-1.49865	0.348724	2.91106	-2.31341	0.237417	2.15385
ENSG00000170561	IRX2	A	-1.77769	-1.65416	-0.169903	1.10413	2.58401	-1.81938	1.59204	2.0205	-1.87955
ENSG00000206476	VARS2	A	-0.916966	0.229261	-1.20693	-1.20693	3.62159	-1.20693	-0.733734	2.62758	-1.20693
ENSG00000249072	ENSG00000249072	A	-0.928562	-0.928562	-0.928562	-0.928562	-0.928562	-0.928562	3.48702	3.01291	-0.928562
ENSG00000171223	JUNB	A	-1.12633	-2.70569	-0.594886	-1.59019	0.435398	-0.880092	2.7979	1.49538	2.16851
ENSG00000206289	RXRB	A	0.901532	-0.863716	-1.775	1.95452	1.52685	-2.56566	1.8881	1.14381	-2.21044
ENSG00000230758	SNAP23P1	A	-1.43867	-1.43867	-1.43867	0.778117	-1.43867	-1.43867	2.85717	2.71327	0.84481
ENSG00000284099	SQSTM1	A	2.37066	-2.86871	-2.86871	0.319934	0.31074	-0.0170675	2.11572	0.0684982	0.568932
ENSG00000176887	SOX11 ENSG00000176887	A	-1.90207	-1.82858	-1.82859	-0.662045	2.05669	2.08005	-1.34185	1.84078	1.58561
ENSG00000196302	GUSBP15	A	-1.72968	-1.93536	-2.66363	0.822776	2.46645	0.816028	0.513955	2.24811	-0.53865
ENSG00000215457	RPS8P3	A	-1.13778	-1.13778	-1.13778	-1.13778	-1.13778	-1.13778	3.54275	2.35101	0.932889
ENSG00000143867	OSR1	A	-2.22835	-2.41741	0.259919	-0.500431	1.87945	1.82082	-1.93361	1.62519	1.49443
ENSG00000276495	APBA2	A	-1.47423	-1.68353	-1.73084	-1.33961	2.31803	1.57164	-1.36064	2.20078	1.4984
ENSG00000282416		A	-2.07494	-1.79808	0.875188	-2.07494	0.718794	2.71493	-1.0598	0.560371	2.13847
ENSG00000274602	PI4KAP1	A	-1.63834	-1.51613	-2.56084	0.901021	2.95291	-0.0045756	0.372774	2.16575	-0.672563
ENSG00000217239		A	-1.13444	-1.13444	-1.13444	-1.13444	-1.13444	-1.13444	3.5062	2.27876	1.02167
ENSG00000139289	PHLDA1	A	-2.42937	-3.22477	-0.0336849	0.285553	2.32808	0.633134	-0.202545	1.78265	0.860941
ENSG00000017483	SLC38A5	A	-1.75967	-2.2584	-1.63691	-1.42599	1.20866	2.21188	-0.0490096	1.87513	1.83431
ENSG00000254719		A	-0.91083	-0.91083	-0.91083	-0.91083	-0.91083	-0.91083	3.11179	3.26402	-0.91083
ENSG00000241370	RPP21	A	-1.58072	0.707525	-0.752662	-0.527167	2.93172	-0.763471	-1.05842	2.91293	-1.86974
ENSG00000275498	PDXDC1	A	-2.31121	-0.258924	0.77197	-2.15974	2.32934	1.57534	-2.19119	1.40449	0.839932
ENSG00000164619	BMPER	A	-2.11864	-2.946	-0.07379	-1.01653	2.58033	1.65273	-0.0248292	1.49593	0.450796
ENSG00000173253	DMRT2	A	-0.588849	-1.30768	0.491494	-2.0929	-0.00251246	2.46555	-2.14155	0.241753	2.9347
ENSG00000229638	RPL4P4	A	-1.33574	-1.57689	-1.51207	-0.597368	-0.649596	-1.00066	3.39646	2.22135	1.05452
ENSG00000227801	COL11A2	A	-1.46762	-1.46762	-1.18569	-1.46762	3.38145	1.59959	-1.29586	0.439771	1.46362
ENSG00000270236		A	-1.55405	-1.55405	-1.55405	-1.55405	0.00540348	-0.348386	3.17521	2.06067	1.32332
ENSG00000231129	ABCF1	A	-2.04083	-1.39082	1.26165	-2.04083	1.48305	1.49751	-2.04083	1.53064	1.74044
ENSG00000233406		A	-1.34148	-1.34148	-1.34148	-0.908013	-0.755595	-1.12408	3.23824	2.43845	1.13544
ENSG00000021826	CPS1	A	-2.02534	-1.63263	-0.189276	-1.48078	2.33677	2.26705	-1.69911	1.53801	0.885308
ENSG00000012817	KDM5D ENSG00000012817	A	-1.44515	0.666923	-1.55173	-0.70665	3.60532	-0.821694	-0.71241	2.14074	-1.17535
ENSG00000268903		A	-1.35062	-1.35062	-1.35062	-1.35062	2.88692	-0.0744199	-1.35062	2.34596	1.59467
ENSG00000160888	IER2	A	-2.69929	-2.56184	-0.698531	-0.401162	1.4857	-0.197131	1.77225	1.43062	1.86939
ENSG00000204590	GNL1	A	-3.30489	-1.71309	-0.0235927	-1.37181	1.58893	1.86234	0.451836	0.855604	1.65468
ENSG00000064655	EYA2	A	-1.49236	-1.76918	-0.418654	-1.02704	3.29842	0.325697	-1.19166	2.514	-0.239213
ENSG00000214199	EEF1A1P12	A	-1.14794	-1.14794	-1.14794	-1.14794	-0.880863	-1.14794	3.57563	2.06204	0.982885
ENSG00000241250	RPL17P20	A	-1.1354	-1.1354	-1.1354	-1.1354	-1.1354	-1.1354	3.36591	2.13309	1.31342
ENSG00000284670	RPSAP56	A	-1.48684	-1.48684	-1.48684	-1.25895	2.22974	2.60349	-1.48684	1.58142	0.791655
ENSG00000213780	GTF2H4	A	-1.98665	-1.19316	0.733252	-1.98665	1.7707	2.22177	-1.98665	0.733854	1.69353
ENSG00000178343	SHISA3	A	-1.6274	-1.79583	-0.869176	-1.1299	2.89325	1.58397	-1.68427	1.49026	1.13909
ENSG00000236418	HLA-DQA1	A	-0.323777	-2.34954	-2.01341	-0.551152	-0.416596	-0.760216	1.52654	2.63332	2.25483
ENSG00000234619	RPL7P11	A	-1.25396	-1.25396	-1.25396	-0.922622	-0.614	-1.25396	3.48254	2.12276	0.947147
ENSG00000139146	SINHCAF	A	-2.31446	-2.46917	-1.10122	-0.423524	2.04744	1.52843	-0.464289	1.96944	1.22736
ENSG00000205927	OLIG2	A	-1.70093	-2.05287	-2.05287	0.87425	2.39201	-1.06882	0.889174	2.23381	0.486253
ENSG00000106004	HOXA5	A	1.1954	-0.118198	-0.512456	-1.92641	2.9086	-1.42681	-0.833519	2.3514	-1.638
ENSG00000267692	TAF9P3	A	-1.79379	-1.79379	-1.79379	-1.79379	2.22086	1.06402	1.33504	1.87735	0.677876
ENSG00000148935	GAS2	A	-0.0572221	-2.02485	-1.4565	-0.332557	3.0345	0.280435	-1.03884	2.62779	-1.03276
ENSG00000123364	HOXC13	A	-1.53733	-1.53733	-0.891535	-1.26365	2.89347	1.14652	-1.53733	2.30802	0.419143
ENSG00000180581	SRP9P1	A	-1.42751	-1.42751	-1.42751	-0.732412	1.92896	2.44178	-1.42751	2.47702	-0.4053
ENSG00000225813		A	-1.79177	-2.40754	-1.7635	0.482536	2.53687	0.472646	-0.232503	2.29809	0.405163
ENSG00000000005	TNMD	A	-1.89535	-1.68393	2.07668	-2.34116	1.93968	-0.260997	1.48478	1.34445	-0.664165
ENSG00000180867	PDIA3P1	A	-1.8603	-2.40338	-1.75092	0.62171	-0.306094	0.17386	2.61516	1.99306	0.916899
ENSG00000206208	TAPBP	A	-2.53068	-0.542091	1.57285	-1.60761	1.41407	1.77442	-2.26217	0.930438	1.25078
ENSG00000181195	PENK	A	0.253756	-0.63433	1.37692	-1.74984	3.96244	-1.05668	-0.980674	-0.0707613	-1.10083
ENSG00000242001		A	2.36572	-1.16314	-1.16314	-1.16314	2.23376	-1.16314	2.37938	-1.16314	-1.16314
ENSG00000214269	LGMNP1	A	-1.14183	-1.14183	-1.14183	-1.14183	-1.14183	-1.14183	2.51727	2.80491	1.52878
ENSG00000228981		A	-1.11178	-1.05059	-1.49357	-1.04424	-0.886907	-1.07178	3.24525	2.11921	1.29441
ENSG00000113296	THBS4	A	0.803096	0.692603	-1.53455	-2.21351	3.44405	-1.69311	-0.549007	0.925011	0.125415
ENSG00000235043	TECRP1	A	1.27469	-1.38803	-1.38803	-1.38803	1.46955	3.08243	-1.38803	1.11346	-1.38803
ENSG00000254866	DEFB109D	A	-1.71732	-1.71732	-1.71732	-1.71732	2.17136	1.1497	0.130292	2.10994	1.30797
ENSG00000142871	CCN1	A	-1.39131	-2.88374	0.483811	-1.07755	3.39196	0.0448942	0.778802	0.317947	0.33518
ENSG00000108511	HOXB6	A	-1.73624	-2.03066	0.0660379	-1.15291	1.97588	2.17785	-1.60411	1.9889	0.315262
ENSG00000280759	AP2A2	A	0.15633	-1.15687	-1.90906	1.91962	1.69177	-1.90906	1.57016	1.54617	-1.90906
ENSG00000278552		A	-1.22764	-1.22764	-1.22764	-0.550658	-1.22764	-1.22764	2.84738	1.8402	2.00126
ENSG00000157445	CACNA2D3	A	-1.30699	-1.96015	-2.01861	-1.08378	2.76996	1.0245	0.0380439	1.7763	0.760736
ENSG00000183486	MX2	A	-2.23395	-2.06256	0.635176	0.922543	2.53907	-1.33156	0.369218	1.93849	-0.776432
ENSG00000236281	NDUFB9P2	A	-1.04114	-1.04114	-1.04114	-1.04114	-1.04114	-1.04114	2.80344	2.91431	0.529102
ENSG00000249192	MTND3P25	A	0.514975	-2.19355	-2.19355	0.844996	1.28539	-2.19355	0.91158	0.94043	2.08329
ENSG00000254618	TMED10P1	A	-1.10494	-1.10494	-1.10494	-1.10494	-1.10494	-1.10494	2.7751	2.49346	1.36106
ENSG00000175886	RPL7AP66	A	-1.22808	-1.22808	-1.22808	-0.963493	-1.03532	-0.983291	2.89462	2.11835	1.65335
ENSG00000235125	NFKBIL1	A	-1.03905	-0.3125	-1.03905	-1.03905	3.1432	-0.363347	-1.03905	2.72791	-1.03905
ENSG00000197565	COL4A6	A	-1.44466	-2.1169	-1.44916	-0.499578	3.02825	0.699612	-0.551451	1.98196	0.351938
ENSG00000263563	UBBP4	A	-0.988532	-1.25487	-1.25487	-0.942476	-0.470913	-1.25487	3.17872	2.37239	0.615426
ENSG00000230796		A	-0.836031	-0.836031	-0.836031	-0.836031	3.53503	-0.836031	-0.836031	2.31719	-0.836031
ENSG00000130035	GALNT8	A	-1.98765	-1.63697	-0.36962	1.84737	2.60177	-0.931604	-0.23706	1.87686	-1.16309
ENSG00000144802	NFKBIZ	A	-1.10209	-2.07264	0.730571	-0.722987	-1.39027	-1.28326	2.67168	1.14101	2.02799
ENSG00000197757	HOXC6	A	-2.4871	-0.915321	0.482297	-1.53706	2.01516	1.19918	-1.75253	1.56291	1.43247
ENSG00000037965	HOXC8	A	-2.41873	-1.43496	0.589444	-2.24582	1.70038	1.38408	-0.507647	1.54473	1.38852
ENSG00000111962	UST	A	-1.59234	-1.7261	0.295819	-1.31868	3.24387	0.836341	-1.27878	1.55701	-0.017147
ENSG00000148848	ADAM12	A	-2.30298	-2.32678	1.82682	-0.856319	2.48743	0.733874	-0.254469	0.956288	-0.263861
ENSG00000105997	HOXA3	A	0.344158	-0.770981	0.13883	-1.48994	2.99802	-1.17121	-1.49589	2.45008	-1.00307
ENSG00000214967	NPIPA7 ENSG00000214967	A	-1.36234	-2.29606	-2.53436	0.762594	2.25214	0.616817	0.410318	1.55075	0.600131
ENSG00000171401	KRT13	A	-1.66174	-1.66174	-1.04697	-0.0359591	3.44351	-0.648275	-0.769253	1.37285	1.00758
ENSG00000237268		A	-1.21451	-1.14024	-1.09062	-1.21451	2.03477	-0.539873	-0.981693	3.28531	0.861377
ENSG00000250687	NAIPP1	A	-1.56171	-1.0981	-2.0582	0.201026	2.77171	-1.57798	0.493133	1.4559	1.37422
ENSG00000228085		A	-1.0716	-1.0716	-1.0716	-1.0716	-1.0716	-1.0716	1.92129	3.14537	1.36294
ENSG00000256148		A	-1.11202	-1.11202	-1.11202	-1.11202	2.21525	-1.11202	-1.11202	2.33116	2.12571
ENSG00000186281	GPAT2	A	-0.970045	-1.45861	-0.695106	-1.72554	1.5316	2.67418	-1.7889	1.40895	1.02347
ENSG00000258608	DNAJC19P9	A	-1.16674	-1.16674	-1.16674	-0.223578	-1.16674	-1.16674	3.20279	2.1413	0.713173
ENSG00000181359	HSP90AA6P	A	-1.1105	-0.915099	-1.1105	-1.1105	-0.898672	-1.1105	2.97283	2.47059	0.812367
ENSG00000122877	EGR2	A	-0.881154	-1.8048	-0.499948	-2.04357	-0.20073	-0.286197	2.9818	0.691025	2.04357
ENSG00000259405	ISCA1P4	A	-0.836906	-0.836906	-0.836906	-0.836906	-0.836906	-0.836906	2.80384	-0.836906	3.0545
ENSG00000274183	H2AB1	A	-1.00387	-1.00387	-0.204225	-1.00387	2.58999	-1.00387	-1.00387	3.16065	-0.52708
ENSG00000100625	SIX4	A	0.0259552	-2.10474	-2.37994	-0.521435	2.28913	1.48171	-1.05509	1.62858	0.635825
ENSG00000152413	HOMER1	A	0.912503	-1.39182	-1.83221	-1.26193	2.49059	1.41464	-2.05562	1.26425	0.459597
ENSG00000206280	ZBTB22	A	0.116992	-1.02072	-1.77221	2.48237	0.967019	-1.77221	1.90326	0.867711	-1.77221
ENSG00000277400		A	-1.80395	-1.0198	-1.48914	0.942735	2.76267	-0.99226	0.441118	2.17019	-1.01158
ENSG00000115844	DLX2	A	-1.7786	-1.7786	-1.7786	-1.10416	1.50868	1.54563	-0.144959	1.39094	2.13966
ENSG00000111321	LTBR	A	-1.18216	-1.86224	1.4209	1.77451	1.62226	-1.66054	0.79443	1.18883	-2.09598
ENSG00000235847	LDHAP7	A	-1.02638	-1.02638	-1.02638	-1.02638	-1.02638	-1.02638	2.32051	3.08733	0.750462
ENSG00000231480	SNRPGP13	A	-1.67986	-1.67986	-1.67986	-1.67986	0.611502	0.942611	1.93821	1.90793	1.31919
ENSG00000082781	ITGB5	A	-2.49423	-2.65707	1.39942	0.76724	1.8572	-0.445696	0.521104	1.3474	-0.295363
ENSG00000064270	ATP2C2	A	-1.43012	-1.28643	-1.13002	-0.571143	3.28328	-0.945695	-0.020903	2.14823	-0.0471882
ENSG00000125931	CITED1	A	-1.5858	-1.94375	-0.793587	0.203973	2.83662	0.0285747	-0.916688	2.37759	-0.206929
ENSG00000250289	VWA8P1	A	-0.817493	-0.817493	-0.817493	-0.817493	-0.817493	-0.817493	3.35111	2.37134	-0.817493
ENSG00000177839	PCDHB9	A	-1.9803	-1.86742	-0.771632	1.5519	1.92316	-0.958646	0.596582	2.33064	-0.824281
ENSG00000227059	ANHX	A	-0.960962	-0.893481	-0.960962	-0.41808	3.33363	-0.960962	-0.507545	2.32932	-0.960962
ENSG00000113739	STC2 ENSG00000113739	A	-1.38256	-1.78624	-0.17614	-0.573385	2.77271	0.280425	-1.0059	2.58274	-0.711643
ENSG00000248532		A	-1.03367	-1.03367	-1.03367	-1.03367	3.16803	1.89863	-1.03367	1.13537	-1.03367
ENSG00000118292	C1orf54	A	-0.987354	-1.52163	-0.519353	-0.778584	1.1498	2.31002	-2.52548	1.38526	1.48732
ENSG00000233939	RPL27AP4	A	-1.00373	-1.00373	-1.00373	-1.00373	-1.00373	-1.00373	3.30357	1.91521	0.80359
ENSG00000151692	RNF144A	A	-1.15463	-2.23323	0.360338	-0.515509	3.1294	0.196917	-0.947886	1.81651	-0.651902
ENSG00000235378	MRPS10P1	A	-1.36044	-1.36044	1.77199	-1.36044	1.25079	-1.36044	-1.36044	1.78652	1.99289
ENSG00000235282	DYNLL1P3	A	-1.06715	-1.06715	-1.06715	-1.06715	-1.06715	-1.06715	2.65379	1.61268	2.13643
ENSG00000240979	NA	A	-1.89922	-1.86469	-0.832979	0.36834	1.31961	1.55644	-1.89922	1.79435	1.45738
ENSG00000134201	GSTM5	A	-0.707314	-1.23414	2.50883	-1.75451	-1.63288	-0.875515	2.06052	1.36562	0.269387
ENSG00000089157	RPLP0	A	-1.40534	-3.34128	-0.481942	0.497582	1.89994	0.4359	0.184416	1.84809	0.362635
ENSG00000277979	NA	A	-1.30235	-1.30235	-1.30235	-1.30235	2.71922	-1.30235	1.50928	1.46637	0.816872
ENSG00000021645	NRXN3	A	-1.47188	-1.58908	-0.933166	-0.926018	0.724852	2.35803	-1.56926	1.42661	1.9799
ENSG00000111262	KCNA1	A	-2.00626	-2.02666	-1.46705	0.466258	2.38992	0.206851	1.11647	1.7869	-0.466431
ENSG00000227795	MTND4LP9	A	-1.06742	-1.06742	-1.06742	-1.06742	2.11654	-1.06742	1.71189	2.57609	-1.06742
ENSG00000175745	NR2F1	B	-3.85074	-5.19238	-4.01618	-1.06438	4.01927	4.55068	-0.70763	3.55203	2.70933
ENSG00000156076	WIF1	B	-5.12061	-5.67988	-2.84172	0.459997	4.42287	0.833347	1.57883	3.88577	2.46139
ENSG00000099994	SUSD2	B	-3.40991	-3.3159	2.47992	5.10121	-2.95521	-2.29421	3.39409	-3.27556	4.27557
ENSG00000184033	CTAG1B	B	-4.06439	-4.30228	-3.5447	4.79479	2.64969	-1.90298	4.13526	2.74654	-0.511931
ENSG00000185559	DLK1	B	-2.96681	-5.06782	-0.482346	4.40872	-3.09671	2.7296	3.32611	-2.46006	3.60931
ENSG00000235657	HLA-A	B	3.63135	-2.22386	-2.33174	5.567	-2.21568	-2.33089	4.57084	-2.33377	-2.33324
ENSG00000185686	PRAME	B	-4.95881	-5.15791	-3.41042	2.55707	2.40847	2.5048	2.05356	1.96672	2.03652
ENSG00000043355	ZIC2	B	-5.1043	-5.24309	-2.28066	3.61719	1.20807	2.81662	2.63823	0.34767	2.00028
ENSG00000075043	KCNQ2	B	-3.99729	-4.22083	-3.91969	3.96301	2.76399	0.588853	2.97962	2.97002	-1.12768
ENSG00000140563	MCTP2	B	-3.22892	-3.35022	-2.95939	3.97564	2.98429	-2.08505	3.66758	3.28418	-2.28812
ENSG00000180178	FAR2P1	B	-2.8781	-3.75995	-3.43798	3.71289	4.19106	-0.9313	2.59483	2.71974	-2.21118
ENSG00000102109	PCSK1N	B	-3.89906	-4.32069	-3.7719	3.70163	-0.0879437	2.9879	2.76774	0.0437155	2.5786
ENSG00000095713	CRTAC1	B	-5.1285	-5.05051	-1.11684	3.28744	1.53278	1.2773	3.02827	0.918637	1.25143
ENSG00000161249	DMKN	B	-4.38723	-5.00136	-2.21926	3.75685	1.07115	1.47844	2.67796	0.456096	2.16734
ENSG00000166426	CRABP1	B	-3.99953	-4.59783	-3.02372	1.1071	0.927468	4.41434	0.677023	1.93429	2.56086
ENSG00000157240	FZD1	B	-3.22126	-3.60671	-1.69628	4.50238	-1.91611	2.80991	3.47822	-2.13353	1.78338
ENSG00000092758	COL9A3	B	-4.33841	-4.37862	-2.84308	3.98037	1.51811	1.1201	3.21836	1.39004	0.333122
ENSG00000143320	CRABP2	B	-5.36058	-4.67028	-1.2926	2.75716	1.38577	2.26987	2.11944	1.20142	1.58979
ENSG00000101144	BMP7	B	-4.32465	-4.27337	-3.2084	3.13769	1.58827	1.90143	3.01918	0.64563	1.51422
ENSG00000167642	SPINT2	B	-4.36422	-4.89272	-1.33008	3.39942	-0.349568	2.35854	2.62573	0.171194	2.38172
ENSG00000220842	RPL21P16	B	-0.0701152	-7.94386	1.11109	0.660407	1.59143	1.57344	0.58605	1.99768	0.493883
ENSG00000255319	ENPP7P8	B	-4.93623	-4.22921	-1.54319	1.46752	3.8307	0.28363	0.99124	3.2211	0.914436
ENSG00000171551	ECEL1	B	-2.42091	-2.96047	-2.83535	4.80573	-0.979927	0.458204	4.56392	-1.57587	0.944667
ENSG00000050767	COL23A1	B	-4.05018	-4.14447	-2.73101	3.21739	2.49499	0.704139	3.17463	1.09621	0.238308
ENSG00000106236	NPTX2	B	-3.4783	-3.19362	-2.65509	4.24003	-1.17173	1.98058	3.93778	-0.601696	0.942056
ENSG00000182379	NXPH4 ENSG00000182379	B	-4.51757	-4.61237	-2.13655	2.31545	1.13641	2.65607	1.54428	1.40187	2.21241
ENSG00000105880	DLX5	B	-2.13364	-2.46369	-0.65502	0.428224	-0.912723	5.1765	-2.04233	-2.0558	4.65848
ENSG00000088882	CPXM1	B	-4.44329	-5.14877	-0.705838	0.64009	2.46654	2.81791	0.492135	1.9385	1.94271
ENSG00000274457	NA	B	-3.87338	-3.87338	-3.87338	1.75479	1.72286	2.82885	1.87733	1.33134	2.10498
ENSG00000235107	RING1	B	2.25358	-1.90111	-1.90111	4.71845	-1.90111	-1.90111	4.4346	-1.90111	-1.90111
ENSG00000179431	FJX1	B	-3.732	-4.10551	-3.24507	4.04429	1.4097	1.56573	2.14558	0.824217	1.09308
ENSG00000105696	TMEM59L	B	-4.04854	-4.11322	-3.05019	1.98645	1.04717	3.23144	0.921319	1.25309	2.77247
ENSG00000224398	CSNK2B	B	1.14261	-4.22071	1.47475	2.33472	-3.62978	2.36675	2.11063	-3.65415	2.07517
ENSG00000187017	ESPN	B	-4.22421	-4.14896	-2.55356	3.15911	2.18514	1.12973	2.53847	1.38232	0.531951
ENSG00000149948	HMGA2	B	-3.56057	-3.76781	-2.38813	4.02734	0.728798	-0.404098	3.84182	0.467211	1.05545
ENSG00000094975	SUCO	B	-3.90849	-4.77039	-2.09751	1.98145	2.3557	3.0598	1.3309	1.46783	0.580703
ENSG00000110492	MDK	B	-4.35109	-4.88606	-1.16039	1.74961	1.33409	2.64857	0.598237	1.3919	2.67513
ENSG00000117122	MFAP2	B	-5.12756	-4.37977	-0.935536	1.53864	2.06444	1.84316	1.18707	1.57734	2.23221
ENSG00000180730	SHISA2	B	-3.13212	-4.35951	-3.6496	2.51624	1.86548	2.67605	1.26218	1.05771	1.76356
ENSG00000139219	COL2A1	B	-4.2261	-4.36472	-2.51746	1.47611	2.40108	1.9458	1.14853	2.14396	1.99281
ENSG00000131668	BARX1	B	-4.09003	-4.20753	-1.91429	2.91311	-0.360352	1.73128	2.86007	0.482034	2.58571
ENSG00000145506	NKD2	B	-3.67948	-3.66029	-3.13753	3.36614	2.18586	0.47753	2.88346	1.81863	-0.254329
ENSG00000184905	TCEAL2	B	-2.62742	-2.83866	-1.8073	3.85062	-1.92059	2.53885	3.35081	-2.51486	1.96853
ENSG00000165643	SOHLH1	B	-2.31957	-2.31957	-2.12878	4.40932	-2.13319	2.05662	4.02184	-2.11216	0.525477
ENSG00000171346	KRT15	B	-2.69317	-2.69317	0.0209603	5.75298	-1.87037	-0.323411	1.85901	-2.17602	2.12319
ENSG00000167281	RBFOX3	B	-3.88706	-3.32944	-3.74632	2.58254	0.805571	2.2087	2.83764	0.993629	1.53474
ENSG00000197283	SYNGAP1	B	-2.30843	-5.54666	-2.69135	2.2004	1.84853	2.22758	1.31598	0.938073	2.01588
ENSG00000239865	RPP21	B	0.969694	-3.83983	1.46014	2.34837	-3.83983	2.04092	1.90062	-3.39366	2.35357
ENSG00000111087	GLI1	B	-4.01698	-4.13496	-2.94164	2.02679	1.93386	1.51851	2.20887	1.67404	1.73152
ENSG00000139970	RTN1	B	-4.23874	-4.23788	-0.97487	3.00281	-0.301961	2.68397	2.44803	-0.108844	1.7275
ENSG00000105290	APLP1	B	-3.48989	-4.36883	-2.60285	2.59387	0.15728	2.56442	1.89881	0.670901	2.57628
ENSG00000182272	B4GALNT4	B	-3.91173	-3.91173	-3.06396	1.26733	2.17926	1.69679	1.19245	2.25551	2.29609
ENSG00000108821	COL1A1 ENSG00000108821	B	-3.87425	-5.06159	-1.1318	1.31201	1.86108	2.76861	1.53095	0.852655	1.74233
ENSG00000006016	CRLF1	B	-2.84961	-5.1477	-2.23209	2.65634	0.896493	1.84159	2.28354	0.644485	1.90695
ENSG00000133048	CHI3L1	B	-3.13926	-3.03601	3.29463	3.0965	-2.35221	-0.0282491	1.94401	-2.25809	2.47866
ENSG00000112559	MDFI	B	-4.72719	-4.69903	0.0150181	1.75968	1.64258	2.0014	1.2588	1.06335	1.68539
ENSG00000141756	FKBP10	B	-4.21589	-4.47021	-1.71785	1.73637	1.65005	2.46071	1.3034	1.35787	1.89556
ENSG00000107317	PTGDS	B	1.32015	-1.28033	-1.04863	4.80384	-2.39379	-0.271906	3.73446	-2.81889	-2.04491
ENSG00000197903	H2BC12	B	-4.55411	-4.11922	-0.753836	2.74862	0.553193	1.79792	2.54014	-0.00298914	1.79028
ENSG00000124205	EDN3	B	-3.24676	-3.41128	-3.39466	3.66878	1.53296	1.28044	2.61755	0.909149	0.0438219
ENSG00000166145	SPINT1	B	-2.70229	-2.77415	-0.108924	3.95184	-1.77496	0.175563	3.5299	-2.6235	2.32651
ENSG00000163623	NKX6-1 ENSG00000163623	B	-1.8203	-1.8203	0.0730079	-0.924783	-1.70623	4.57163	-1.2349	-1.8203	4.68219
ENSG00000237418		B	-4.30792	-4.30792	-1.42212	1.71044	2.45848	2.11743	0.987935	1.00361	1.76008
ENSG00000135916	ITM2C	B	-3.90272	-4.19554	-2.32831	2.12333	1.76557	1.67859	1.83566	1.43902	1.5844
ENSG00000273622	CDC42EP5	B	-3.18583	-3.18583	-3.18577	2.88785	2.31527	0.57279	2.35609	2.33369	-0.908262
ENSG00000261857	MIA	B	-2.67187	-3.31731	-1.42976	0.885684	-1.65503	3.67739	1.62486	-0.998071	3.88412
ENSG00000112837	TBX18	B	-1.98371	-2.89847	0.200307	3.1386	-3.17585	2.45578	1.82804	-2.44136	2.87666
ENSG00000178773	CPNE7	B	-3.6337	-3.53947	-3.16576	2.47077	2.06184	1.10372	2.00806	2.02801	0.666537
ENSG00000169169	CPT1C	B	-3.85839	-3.82525	-2.70133	2.32323	1.1338	2.02548	1.99042	1.26233	1.64971
ENSG00000130720	FIBCD1	B	-3.45415	-3.40692	-2.70012	3.32258	2.60724	0.14267	2.41389	1.11271	-0.0378995
ENSG00000178222	RNF212	B	-3.99685	-4.19167	-1.61241	1.04613	2.14575	2.69717	0.472668	1.34835	2.09086
ENSG00000150551	LYPD1	B	-3.24385	-3.42143	-2.73968	0.509674	2.64794	2.98655	-0.610485	1.25403	2.61725
ENSG00000175130	MARCKSL1	B	-3.90943	-4.26041	-1.8183	1.63902	1.46078	2.37431	0.902333	1.56392	2.04778
ENSG00000136099	PCDH8	B	-2.24091	-2.27884	-2.18006	2.94865	-2.23152	3.27773	2.06902	-1.9752	2.61112
ENSG00000065320	NTN1	B	-2.83886	-2.92467	-1.41879	4.1572	-0.992543	0.790988	3.89152	-1.1615	0.496652
ENSG00000196358	NTNG2	B	-3.68817	-3.71512	-2.58331	2.69826	1.71682	1.46708	2.48253	0.539334	1.08257
ENSG00000233608	TWIST2	B	-3.34271	-3.18959	2.47695	3.65761	0.454312	-1.26692	2.83506	0.188106	-1.81283
ENSG00000198576	ARC	B	-3.43844	-3.58948	-1.99594	1.60825	0.720372	-0.978969	3.46922	1.76773	2.43725
ENSG00000118257	NRP2	B	-4.4183	-4.09436	0.0386284	2.08012	1.55277	2.72121	0.498244	-0.136954	1.75864
ENSG00000120885	CLU	B	-3.32401	-2.19573	2.41149	3.07343	-2.44916	1.20846	1.54395	-2.64469	2.37626
ENSG00000006283	CACNA1G	B	-3.521	-3.53456	-3.17695	1.99062	1.46516	2.35288	1.47419	1.08529	1.86437
ENSG00000138829	FBN2	B	-3.03412	-3.09273	-2.19724	-1.06603	2.66331	3.66931	-0.714702	1.91184	1.86037
ENSG00000049089	COL9A2	B	-3.33647	-3.27136	-2.35976	3.1997	-0.265257	2.70193	2.13354	-0.502924	1.7006
ENSG00000064300	NGFR ENSG00000064300	B	-3.93988	-4.1333	-1.47724	2.32277	2.1674	0.61014	1.90882	1.78581	0.755486
ENSG00000183798	EMILIN3	B	-2.83231	-3.02809	-2.93044	2.03835	2.85793	-0.979097	2.93151	2.20823	-0.266079
ENSG00000218336	TENM3	B	-1.34717	-2.02426	1.14783	-1.61873	-1.65038	4.4071	-1.13015	-1.79225	4.00802
ENSG00000284654		B	-2.44623	-2.44623	-2.44623	4.27211	0.0774375	1.77199	2.30341	-2.44623	1.35996
ENSG00000122641	INHBA	B	-3.32647	-3.52616	-2.77643	0.865736	3.19345	1.20108	1.93047	2.23406	0.20427
ENSG00000131398	KCNC3	B	-2.50909	-3.02377	-1.68413	3.11578	-1.32327	2.86044	2.4681	-1.98762	2.08355
ENSG00000062038	CDH3	B	-3.16085	-3.21664	-0.629333	2.46495	-1.57466	2.62289	2.04901	-1.58359	3.02821
ENSG00000118971	CCND2	B	-4.16787	-4.35654	-0.819569	1.76264	1.562	1.42628	1.71105	1.65706	1.22495
ENSG00000137285	TUBB2B	B	-3.48581	-4.19085	-2.03431	1.91728	0.830602	2.32393	0.860274	1.59714	2.18175
ENSG00000129354	AP1M2	B	-2.58969	-2.28735	-1.02049	4.27148	-1.03872	-0.685251	3.47512	-1.90056	1.77545
ENSG00000181449	SOX2	B	-1.9061	-1.84386	1.46554	-1.0527	-1.78353	3.33416	-1.51802	-1.42551	4.73002
ENSG00000128045	RASL11B	B	-3.84536	-4.17751	-1.40552	2.66395	2.01216	1.43104	1.45115	0.981398	0.888691
ENSG00000133169	BEX1	B	-3.24292	-3.45553	-3.34855	2.22073	1.53125	1.63197	1.45736	1.20223	2.00345
ENSG00000182580	EPHB3	B	-3.7221	-3.54728	-2.614	2.36339	1.40412	1.59256	2.30836	1.24208	0.972867
ENSG00000187634	SAMD11	B	-3.63217	-3.47156	-2.86756	1.74646	2.10835	2.11587	0.851271	1.45458	1.69475
ENSG00000082497	SERTAD4	B	-3.70637	-3.45337	-2.08452	3.10171	0.89849	1.35516	1.97818	-0.2398	2.15052
ENSG00000142765	SYTL1	B	-2.53308	-2.64001	-1.61195	3.50273	-1.72527	1.86502	3.02482	-1.81051	1.92825
ENSG00000198598	MMP17	B	-2.98941	-3.45606	-2.40172	3.13167	2.25382	0.0284794	2.77616	1.15339	-0.496339
ENSG00000170891	CYTL1	B	-3.44609	-3.4788	-0.78824	2.71441	-0.439731	1.68313	2.76628	-1.44736	2.43641
ENSG00000111432	FZD10	B	-2.88015	-3.09416	-2.95541	3.57028	0.774917	0.508913	3.15421	0.253811	0.667595
ENSG00000104447	TRPS1	B	-3.39661	-3.70887	-1.19358	2.31446	-0.74785	3.3711	1.78488	-0.269163	1.84563
ENSG00000156427	FGF18	B	-3.44004	-3.34845	-2.22518	3.17562	1.88919	0.105946	2.88249	0.803522	0.156889
ENSG00000181085	MAPK15	B	-3.32594	-3.51078	-2.38703	0.58575	1.53224	2.87503	-0.274283	1.89176	2.61325
ENSG00000182132	KCNIP1	B	-3.21815	-3.46653	-2.53301	3.14669	1.49575	0.782268	2.92439	0.413513	0.455065
ENSG00000171243	SOSTDC1	B	-3.29229	-3.29229	-2.47778	1.55483	3.53743	0.580065	0.699453	2.54719	0.143392
ENSG00000187243	MAGED4B	B	-3.51157	-3.78048	-2.54595	1.95369	1.51224	2.07586	1.17984	1.17862	1.93774
ENSG00000101825	MXRA5	B	-1.61323	-2.21098	-0.164784	-0.971415	0.578807	4.75384	-2.68325	-0.896063	3.20708
ENSG00000171617	ENC1	B	-3.25238	-4.12225	-1.91019	3.04833	1.29931	1.23126	2.13532	0.981659	0.588954
ENSG00000043039	BARX2	B	-3.35504	-3.4988	-2.11878	1.18276	1.79049	3.17229	-0.657562	1.33176	2.15289
ENSG00000275873	LMNTD2	B	-3.24036	-3.21501	-1.81161	2.77313	-0.64674	2.23016	2.92305	-0.75118	1.73857
ENSG00000131409	LRRC4B	B	-3.27428	-2.8691	-2.7837	1.87433	-0.118156	2.93247	1.7669	-0.207104	2.67864
ENSG00000136110	CNMD	B	-2.35122	-2.35122	-0.820813	2.96323	-2.25591	1.15114	2.97883	-2.20958	2.89556
ENSG00000101104	PABPC1L	B	-3.61001	-3.61164	-2.37804	2.42746	1.47455	2.03838	1.59518	0.750859	1.31327
ENSG00000112655	PTK7	B	-3.69272	-3.9324	-1.8403	2.17929	1.19288	1.90136	1.70858	0.855614	1.6277
ENSG00000229300	SNHG32	B	-4.04887	-2.26029	1.10474	2.00211	3.04529	0.510154	-1.90734	2.68794	-1.13374
ENSG00000139263	LRIG3	B	-3.20493	-4.27074	-1.12719	3.03161	1.82414	1.44968	1.43983	1.24265	-0.385041
ENSG00000006377	DLX6	B	-1.81606	-1.71569	-1.56247	-0.279095	-1.31145	4.54833	-0.706979	-1.05998	3.90339
ENSG00000181790	ADGRB1	B	-3.0563	-3.19788	-2.7908	3.0309	0.61999	2.15561	2.47447	0.260978	0.503028
ENSG00000257825		B	-2.4882	-2.4882	-2.4882	2.35526	3.26071	1.11635	1.09121	2.12929	-2.4882
ENSG00000157227	MMP14	B	-3.99599	-4.45382	0.426954	1.16286	1.38308	2.21331	1.13807	0.743363	1.38217
ENSG00000169710	FASN	B	-3.69049	-4.54826	2.59026	1.06172	0.275669	1.30658	0.508505	0.793972	1.70204
ENSG00000102854	MSLN	B	-2.50356	-2.50356	-0.392904	3.96095	-1.46684	-0.187396	3.07798	-1.91561	1.93095
ENSG00000133067	LGR6	B	-3.61094	-3.45271	-1.80216	3.07122	1.19331	0.995965	2.48344	0.0228015	1.09907
ENSG00000144339	TMEFF2	B	-1.84251	-2.00782	-1.90882	2.69703	-2.00351	-0.790181	4.87332	0.433908	0.548585
ENSG00000124302	CHST8	B	-3.32149	-3.19636	-2.9872	2.24417	1.78154	1.59589	2.18852	0.990461	0.704467
ENSG00000140937	CDH11	B	-4.05046	-3.85748	-0.649025	1.87171	1.05243	2.06978	1.83139	-0.0175997	1.74926
ENSG00000092051	JPH4	B	-3.30805	-3.54791	-2.50095	1.13802	0.858552	2.63858	1.14896	1.31814	2.25466
ENSG00000101955	SRPX	B	-2.43899	-2.29428	2.61222	-0.815408	-2.30371	3.64421	1.02062	-1.76002	2.33536
ENSG00000131771	PPP1R1B	B	-2.71556	-3.02884	2.22986	3.57657	-1.56411	0.410016	2.73978	-1.53824	-0.109482
ENSG00000225210	DUXAP9	B	-4.10956	-3.71985	-0.986623	2.31224	1.89801	1.58464	1.39676	0.638665	0.985718
ENSG00000244306	DUXAP10	B	-4.21623	-3.35069	-1.59052	2.1035	1.90751	1.37228	1.61669	1.24503	0.912423
ENSG00000206290	COL11A2	B	-1.31516	-2.06683	-2.06683	2.97205	3.81821	-2.06683	1.78947	1.00277	-2.06683
ENSG00000169750	RAC3	B	-3.47118	-4.17067	-0.010154	1.94409	-0.4059	2.33139	1.09604	0.170973	2.51541
ENSG00000172803	SNX32	B	-3.34044	-3.13935	-2.97403	1.62158	1.84003	2.38898	0.850042	1.60158	1.15162
ENSG00000250510	GPR162	B	-3.64715	-3.31533	-2.53983	1.71621	1.63691	1.83225	1.24946	1.5231	1.54438
ENSG00000162595	DIRAS3	B	-2.80109	-3.35688	-2.89618	0.951314	2.40319	2.90648	1.46065	1.0102	0.322304
ENSG00000129990	SYT5	B	-2.11252	-2.09041	-0.961398	3.68568	-1.81998	-0.120835	3.73237	-1.76495	1.45204
ENSG00000185499	MUC1	B	-3.64291	-3.00884	-2.16114	2.39029	0.973753	2.09793	2.53872	-0.22826	1.04046
ENSG00000228892	AGPAT1	B	-1.61818	-1.94386	2.20748	-1.20884	-1.66879	3.80098	-1.257	-1.66874	3.35695
ENSG00000285186		B	-2.23711	-0.311212	-2.23711	0.678968	-2.23711	2.67194	2.52783	-2.23711	3.38092
ENSG00000068078	FGFR3	B	-3.52307	-3.72544	-1.33167	2.71352	0.518561	1.53265	2.17854	-0.00973845	1.64665
ENSG00000251493	FOXD1	B	-2.67264	-3.3681	-2.56556	1.97986	2.07163	2.23944	-0.985821	1.02845	2.27274
ENSG00000130294	KIF1A	B	-3.01404	-3.11149	-3.02307	2.63587	1.4851	0.417933	2.40965	1.13939	1.06066
ENSG00000160469	BRSK1	B	-3.05335	-3.18806	-3.20221	1.79367	1.22574	2.21302	1.5789	1.07328	1.55902
ENSG00000132535	DLG4	B	-3.15824	-3.77322	-2.34294	2.10486	1.56629	2.07723	1.29599	0.953498	1.27653
ENSG00000108947	EFNB3	B	-3.23761	-3.43733	-2.73309	1.80873	1.58032	1.86248	1.04114	1.29516	1.82019
ENSG00000158321	AUTS2	B	-2.91666	-4.08838	-1.97183	1.68056	2.33468	2.17777	1.14034	0.944518	0.699027
ENSG00000006118	TMEM132A	B	-2.88191	-3.52319	-2.97212	1.43029	1.96451	2.00951	1.18704	1.30379	1.4821
ENSG00000129474	AJUBA	B	-3.16608	-3.73881	-2.34864	1.96227	1.51177	2.04059	1.2002	0.908121	1.63058
ENSG00000181649	PHLDA2	B	-2.29359	-1.77941	0.925952	3.75061	-1.72749	-0.254292	3.55211	-2.3691	0.195215
ENSG00000076604	TRAF4	B	-3.0299	-4.17298	-1.78249	1.57795	0.941764	1.52872	2.31771	0.914026	1.70521
ENSG00000100968	NFATC4	B	-3.29001	-3.92778	-1.87113	1.48329	1.9772	1.893	0.93691	1.51081	1.28772
ENSG00000227794	RPS18	B	-2.02972	-4.13344	-2.8644	1.36744	2.20572	1.767	0.943721	1.76131	0.982366
ENSG00000142102	PGGHG	B	-1.79848	-2.67793	-0.781045	3.55837	-1.20013	0.706099	2.97676	-2.55946	1.77582
ENSG00000176769	TCERG1L	B	-2.46293	-2.46965	-2.35271	3.21814	1.71715	-1.39933	2.84603	1.59807	-0.694771
ENSG00000175832	ETV4	B	-3.18007	-3.60793	-2.4065	1.7495	1.35052	0.889998	1.23296	2.07169	1.89985
ENSG00000126752	SSX1	B	-3.0774	-3.19754	-2.53074	0.610794	2.64775	1.71017	0.0663456	2.34011	1.43052
ENSG00000079101	CLUL1	B	-3.48446	-3.10397	-2.13036	2.4875	1.26764	1.89293	2.20275	-0.231533	1.0995
ENSG00000135318	NT5E	B	-1.35369	-1.42143	1.28066	4.0184	-2.07874	-1.348	3.00725	-2.57507	0.470621
ENSG00000272006		B	-2.88576	-2.88576	-2.88576	3.09697	1.32331	-0.209929	1.58525	2.02107	0.84062
ENSG00000124140	SLC12A5	B	-3.73646	-3.24543	-1.98379	1.88151	1.97333	0.610947	1.66823	1.96227	0.869399
ENSG00000106484	MEST	B	-3.37794	-3.90232	3.0985	0.107165	1.98051	1.70981	-0.270257	0.633729	0.0207993
ENSG00000130635	COL5A1	B	-3.49252	-3.97728	-1.34358	1.48438	1.58446	2.16166	1.04671	1.11819	1.41798
ENSG00000120088	CRHR1	B	-3.21676	-3.33978	-2.36586	0.76981	2.4149	2.48598	0.848023	0.873548	1.53013
ENSG00000159164	SV2A	B	-3.19026	-3.11945	-2.73421	2.16433	0.702089	2.06016	1.5398	0.592874	1.98467
ENSG00000272710		B	-2.48175	-4.59988	-1.49976	1.07411	2.07646	0.797323	1.5319	0.99641	2.10519
ENSG00000121753	ADGRB2	B	-3.54091	-3.68243	-1.59724	1.7152	2.41947	1.03976	1.07962	1.72876	0.837776
ENSG00000130558	OLFM1	B	-2.70185	-3.14712	-0.997317	3.50546	1.10446	-0.169573	3.09544	0.603829	-1.29334
ENSG00000060718	COL11A1	B	-1.86409	-1.82929	-1.45895	-0.665397	-1.37931	4.5922	0.385889	-0.934494	3.15345
ENSG00000176165	FOXG1	B	-1.21312	-1.27409	-1.29669	-1.0072	-1.29669	4.34663	-1.02907	-1.06912	3.83934
ENSG00000168916	ZNF608	B	-2.83449	-4.44619	-1.10376	2.45466	1.74949	1.33562	1.5566	0.641149	0.646923
ENSG00000185551	NR2F2	B	-2.80106	-3.29928	-1.75522	2.49287	2.54837	-0.0145703	1.76063	2.09217	-1.02391
ENSG00000232005	PBX2	B	-2.19977	-1.74553	2.03205	-2.19977	0.59775	3.30637	-2.19977	-0.676644	3.08531
ENSG00000144045	DQX1	B	-1.62712	-1.83402	-1.83402	3.9959	-1.54583	1.3942	3.36137	-1.23622	-0.674266
ENSG00000182985	CADM1	B	-2.76057	-4.3544	-1.40623	2.24262	0.827788	1.98831	1.44606	0.47636	1.54006
ENSG00000110092	CCND1 ENSG00000110092	B	-3.07062	-4.12136	1.42129	2.84274	0.0431792	0.151147	2.41092	-0.344074	0.666769
ENSG00000115457	IGFBP2	B	-3.4812	-3.62445	-1.79021	1.80061	0.773297	2.15529	1.69154	1.16003	1.31509
ENSG00000122691	TWIST1	B	-3.36144	-3.52041	1.56302	-1.33912	1.45032	2.48939	-0.535959	0.934075	2.32013
ENSG00000206284	WDR46	B	0.375316	-1.8628	-2.52762	3.35865	1.4298	-2.52762	2.52725	1.39559	-2.16855
ENSG00000197467	COL13A1	B	-3.27894	-3.34035	-1.14575	3.20834	1.64528	0.620314	2.46811	-0.171424	-0.00556749
ENSG00000139182	CLSTN3	B	-3.60023	-4.04342	-0.700382	1.22317	1.78729	2.05127	0.860622	0.815826	1.60585
ENSG00000273633	CDC42EP5	B	-3.75099	-3.90384	-0.471059	1.31074	1.44609	2.52695	0.738799	0.785928	1.31738
ENSG00000176720	BOK	B	-3.61906	-3.42287	1.6063	2.8053	-0.309872	0.115425	2.65126	0.0446298	0.12888
ENSG00000132321	IQCA1	B	-3.20895	-3.75178	-1.99743	2.0524	1.83737	1.24686	1.438	1.23518	1.14835
ENSG00000077782	FGFR1 ENSG00000077782	B	-3.3099	-4.04236	-0.642737	2.54773	1.70129	1.28918	1.76503	0.620527	0.0712434
ENSG00000184347	SLIT3	B	-4.03926	-3.32387	0.763621	2.75122	0.317622	0.55897	2.42634	-0.0740785	0.619426
ENSG00000170004	CHD3	B	-3.37489	-3.86357	-1.4873	1.1463	1.71628	2.01509	0.934276	1.17288	1.74094
ENSG00000162591	MEGF6	B	-2.97122	-3.81432	-1.54011	2.66735	2.0331	0.826764	2.01863	0.518457	0.261349
ENSG00000141582	CBX4	B	-3.49078	-3.87378	-1.24417	0.855654	1.40849	1.00917	1.9227	1.50979	1.90292
ENSG00000284621		B	-2.57206	-2.57206	-2.57206	3.50125	-0.219817	1.66373	0.813317	-0.516558	2.47425
ENSG00000175928	LRRN1 ENSG00000175928	B	-0.673897	-2.61302	-1.94683	0.590292	0.717645	3.50214	0.00823594	-2.76228	3.17772
ENSG00000284651		B	-1.78846	-1.78846	-1.78846	3.99772	-1.78846	0.87185	2.69659	-1.78846	1.37614
ENSG00000041982	TNC	B	-3.68954	-2.88622	-0.601783	0.578476	0.653086	3.05868	-0.506873	0.392648	3.00152
ENSG00000077274	CAPN6	B	-1.5848	-2.05382	-1.6273	2.4675	-2.50126	2.32861	2.34305	-1.79651	2.42453
ENSG00000099617	EFNA2	B	-2.63333	-2.63333	-2.63333	3.36792	0.372261	0.91713	2.85052	0.602291	-0.210137
ENSG00000258947	TUBB3	B	-2.75713	-3.22333	-1.66632	1.62045	-1.5527	1.83416	2.29045	0.929815	2.52459
ENSG00000164050	PLXNB1	B	-4.06933	-3.33425	-0.849728	2.33709	0.925057	1.36551	1.5488	0.550817	1.52602
ENSG00000219604	ENSG00000219604	B	0.113495	-2.57905	1.42924	3.83345	-2.57905	0.271643	2.19065	-2.57905	-0.101338
ENSG00000124493	GRM4	B	-2.79195	-2.84789	-1.65748	3.05268	-0.475336	2.03312	1.91408	-1.23287	2.00565
ENSG00000175866	BAIAP2	B	-3.33021	-3.87045	-1.08483	2.21825	1.67812	0.739652	2.10785	1.16774	0.373859
ENSG00000139800	ZIC5	B	-3.0951	-3.2664	-2.02316	2.70005	0.941414	1.62521	2.16311	-0.2378	1.19268
ENSG00000167702	KIFC2	B	-3.04689	-3.56334	-1.15811	2.33908	-0.00883792	2.05739	1.96108	-0.594788	2.01441
ENSG00000104723	TUSC3	B	-3.45842	-3.95726	-0.958324	1.40154	1.23979	2.10512	0.94885	0.961012	1.71769
ENSG00000005513	SOX8	B	-2.47615	-2.52702	-2.60275	2.20981	2.34233	-0.315935	2.38982	2.11394	-1.13404
ENSG00000232111		B	-1.18337	-1.27784	-0.34371	-1.27784	-1.27784	4.26018	-1.27784	-1.27784	3.65608
ENSG00000105419	MEIS3	B	-3.69028	-3.54282	-1.36309	1.62457	1.53582	2.09722	1.08096	1.0163	1.24131
ENSG00000149527	PLCH2	B	-2.32851	-2.32851	-1.47769	3.6906	-0.780572	0.196752	3.47497	-1.14155	0.694498
ENSG00000088340	FER1L4	B	-2.8942	-3.14291	-2.56807	1.79808	0.774638	2.57698	1.60741	0.112353	1.73572
ENSG00000206412	GNL1	B	-3.00789	-2.33749	-3.36793	2.50174	1.67174	1.30749	1.61008	0.401141	1.22111
ENSG00000114251	WNT5A	B	-2.9496	-3.30422	-2.48977	1.90714	1.41396	1.7177	1.99058	0.158327	1.55588
ENSG00000166922	SCG5	B	-2.17466	-2.30027	-0.355333	0.589918	-1.80974	3.41035	1.97046	-2.04177	2.71105
ENSG00000272901	SMDT1	B	-0.912071	-5.66162	-0.0717797	0.545786	1.02638	1.39094	1.35553	1.2544	1.07244
ENSG00000196338	NLGN3	B	-2.94411	-3.03382	-2.46875	2.15217	0.118084	2.26289	1.43469	0.27444	2.2044
ENSG00000254726	MEX3A	B	-3.10406	-3.13897	-2.54799	0.691049	1.5874	2.07202	0.745659	1.77841	1.91648
ENSG00000163083	INHBB	B	-3.46093	-3.26841	1.42537	2.959	-0.232909	1.07674	2.06407	-1.1589	0.595968
ENSG00000131037	EPS8L1	B	-2.14961	-2.72702	-1.29362	3.74744	-1.02552	0.0516021	3.12566	-0.855636	1.12671
ENSG00000104413	ESRP1	B	-2.20866	-2.20866	-0.49901	3.3138	-2.00329	0.146678	2.93839	-1.5823	2.10307
ENSG00000176788	BASP1	B	-4.10637	-3.57218	-0.179838	1.08717	1.75375	1.41418	1.27396	1.51326	0.816065
ENSG00000136883	KIF12	B	-2.50354	-2.50354	-2.14691	3.27966	0.10427	0.806739	3.21397	-1.00929	0.758641
ENSG00000178162	FAR2P2	B	-3.04807	-3.46024	-2.01459	2.38756	2.24718	0.826256	1.55743	1.01037	0.494121
ENSG00000169783	LINGO1	B	-2.9372	-2.92731	-2.01704	2.92175	0.493201	1.27483	2.78965	-0.412783	0.814899
ENSG00000230930	COL11A2	B	-2.473	-2.91042	-2.63019	1.88966	3.54662	1.48311	0.36145	0.25997	0.472795
ENSG00000259803	SLC22A31	B	-2.9077	-2.67414	-2.0252	3.03752	1.12982	-0.253096	2.94976	1.07656	-0.333535
ENSG00000133134	BEX2	B	-2.46438	-3.05918	-3.20051	2.27388	0.923447	1.73778	1.74448	0.58533	1.45915
ENSG00000123975	CKS2	B	-3.13067	-3.56966	-2.06294	1.09581	1.00286	1.69538	1.515	1.65756	1.79666
ENSG00000102924	CBLN1	B	-2.72381	-2.26279	-0.797916	1.26693	-0.48692	3.86801	0.503235	-1.8854	2.51867
ENSG00000198417	MT1F	B	-2.03937	-1.18053	0.343221	3.65827	-1.13586	-1.21431	3.86594	-1.67685	-0.620505
ENSG00000184564	SLITRK6	B	-0.966513	-1.2555	-1.08709	-0.967957	-1.20718	4.93605	-0.918424	-1.20625	2.67287
ENSG00000107731	UNC5B	B	-2.4478	-3.39228	-1.95853	3.02502	0.771057	1.70464	2.37599	-0.390602	0.312495
ENSG00000204682	MIR1915HG	B	-2.01569	-2.00892	-1.36332	3.41998	1.1914	-1.33143	3.46922	0.333265	-1.69451
ENSG00000171345	KRT19	B	-2.74293	-2.98962	0.701989	1.68827	-0.249404	0.198141	1.74057	-1.95454	3.60753
ENSG00000168546	GFRA2	B	-3.24729	-3.10135	-1.80025	2.62921	1.60471	0.701163	2.36602	0.881651	-0.03387
ENSG00000112290	WASF1	B	-3.20481	-3.23258	-1.59849	-0.00820204	1.83705	2.64133	0.101715	1.62156	1.84243
ENSG00000154545	MAGED4	B	-2.94588	-3.20083	-2.66054	1.47758	1.14716	2.02696	1.44785	1.00574	1.70197
ENSG00000116106	EPHA4	B	-3.37783	-3.7228	-1.16572	1.72269	1.77419	2.036	1.14857	0.687021	0.897891
ENSG00000136295	TTYH3	B	-3.26294	-4.25141	-0.181563	1.90154	1.07946	1.48613	1.13508	0.748185	1.34552
ENSG00000184194	GPR173	B	-2.50918	-3.18274	-2.96949	1.72565	2.2777	1.75906	0.936147	1.04952	0.913341
ENSG00000198794	SCAMP5	B	-3.41045	-3.55272	-1.47417	1.34974	1.47103	2.09534	0.742717	1.30109	1.47743
ENSG00000214617	SLC6A10P	B	-2.10917	-2.0327	-2.45891	3.65869	0.492691	-0.649011	3.13941	0.458163	-0.49915
ENSG00000215612	HMX1	B	-2.21055	-2.21055	-2.21055	3.21844	1.65348	-0.626918	2.51401	1.43666	-1.564
ENSG00000075618	FSCN1	B	-3.25799	-4.1283	-0.642297	1.56703	1.41142	1.46544	1.26522	1.13895	1.18053
ENSG00000134323	MYCN	B	-2.44807	-2.37586	-2.18732	3.56162	-0.292609	1.038	2.57661	-0.944189	1.0718
ENSG00000205517	RGL3	B	-1.85671	-0.991395	-0.0365949	3.50117	-1.51747	-1.66155	3.20987	-2.14937	1.50207
ENSG00000160282	FTCD ENSG00000160282	B	-2.54003	-2.80669	-2.72984	0.948163	3.33536	0.214983	0.589574	1.82088	1.16761
ENSG00000278605	TSEN34	B	-0.358685	-2.90722	0.593358	2.41386	-2.81143	1.84501	1.95215	-2.4522	1.72516
ENSG00000182492	BGN	B	-3.606	-2.76726	-1.022	2.61098	-0.37839	0.374847	2.62835	1.71222	0.44726
ENSG00000176890	TYMS	B	-3.42976	-3.53854	-1.54118	1.4211	1.3422	1.22583	1.35628	1.61806	1.54602
ENSG00000173068	BNC2	B	-1.85078	-2.62177	-0.651992	-0.557743	0.784592	3.59717	-1.70875	-0.335779	3.34506
ENSG00000105088	OLFM2	B	-3.65181	-3.7015	1.94045	1.20701	0.158118	2.01598	0.510694	0.0512278	1.46983
ENSG00000151136	BTBD11	B	-2.87232	-3.04022	-2.62076	2.33037	1.72029	1.29111	1.83128	0.538238	0.82201
ENSG00000120820	GLT8D2	B	-3.33179	-3.6065	-1.3494	2.0017	1.98459	1.05915	1.3596	1.0663	0.816358
ENSG00000105737	GRIK5	B	-2.77608	-2.90024	-2.6355	0.630459	0.862311	2.3856	1.51915	0.417537	2.49677
ENSG00000172824	CES4A	B	-2.95989	-2.90995	-2.3343	2.55692	1.05642	1.81704	1.98213	-0.153569	0.945206
ENSG00000204065	TCEAL5	B	-2.82355	-2.61371	-2.64176	2.35701	-0.125496	2.15617	1.97291	0.115488	1.60294
ENSG00000139200	PIANP	B	-2.59925	-2.56379	-2.39796	-0.528949	1.82265	2.622	-0.46907	1.73364	2.38075
ENSG00000108452	ZNF29P	B	-2.22259	-2.22259	-2.22259	2.16117	2.28029	2.65869	1.16472	0.625461	-2.22259
ENSG00000178531	CTXN1	B	-3.03703	-3.08305	-1.91475	1.9223	-0.311889	2.10689	1.14489	0.734495	2.43814
ENSG00000180340	FZD2	B	-2.81045	-3.08019	-2.34632	0.366353	1.36133	2.36421	0.392011	1.30125	2.45182
ENSG00000066468	FGFR2	B	-3.45773	-3.91944	-0.179111	1.83233	1.84133	1.27503	0.807041	0.507234	1.29332
ENSG00000184058	TBX1	B	0.467041	-3.22138	-3.15152	3.30689	-0.0218893	0.187675	2.58472	0.136266	-0.287792
ENSG00000167371	PRRT2	B	-3.45562	-3.21299	-1.72355	1.44304	1.58751	2.17294	0.832699	0.844941	1.51102
ENSG00000162551	ALPL	B	-2.04459	-2.10102	0.169265	3.3566	-1.43187	0.433325	3.12599	-2.36372	0.856029
ENSG00000182667	NTM	B	-2.36681	-1.45709	1.18334	3.98852	-0.728004	-0.878188	2.88264	-1.1091	-1.51531
ENSG00000141380	SS18	B	-2.84498	-4.29389	-0.852972	1.51854	1.5854	1.4453	1.18385	0.976297	1.28245
ENSG00000164078	MST1R	B	-2.4387	-2.51497	-1.48052	2.95857	-0.916721	1.60172	2.40328	-1.48567	1.87301
ENSG00000165617	DACT1	B	-2.66458	-3.58693	-1.12511	2.67892	0.192099	2.09866	1.90004	-0.591317	1.09821
ENSG00000104549	SQLE	B	-3.28268	-3.08512	-1.87543	0.782013	1.84316	2.12109	0.192603	1.36235	1.94202
ENSG00000105376	ICAM5	B	-2.98063	-2.80636	-2.64926	2.26352	0.775903	1.82778	1.89359	0.665905	1.00955
ENSG00000185652	NTF3	B	-2.49367	-3.10489	-2.3949	1.61917	2.85451	1.35237	-0.0571321	1.88979	0.33474
ENSG00000175264	CHST1	B	-2.70057	-3.04515	-2.18851	2.62991	1.51402	2.02318	1.69086	0.460786	-0.384531
ENSG00000254792		B	-1.57491	-4.86015	-0.680798	0.680711	1.29257	1.71806	-0.0494548	1.98715	1.48682
ENSG00000138083	SIX3	B	-3.11865	-3.00167	-2.08271	1.97237	-0.103758	2.20662	1.56563	0.942167	1.62001
ENSG00000184985	SORCS2	B	-2.47561	-2.62536	-1.94701	2.85367	-0.518851	1.72372	2.39536	-1.06186	1.65595
ENSG00000015413	DPEP1 ENSG00000015413	B	-2.71433	-2.64549	-2.37011	2.71863	2.00553	0.314527	2.44215	0.400155	-0.151045
ENSG00000167617	CDC42EP5	B	-1.06117	-1.16398	-2.50715	-1.0105	0.609826	3.43446	-1.6006	-0.306482	3.6056
ENSG00000053438	NNAT	B	-2.859	-3.98524	-0.282309	0.349273	1.26815	2.26065	-0.0773251	0.926965	2.39883
ENSG00000282306		B	-0.891463	-1.11727	-1.11727	-1.11727	-1.11727	4.28067	-1.11727	-1.11727	3.3144
ENSG00000128594	LRRC4	B	-2.16029	-2.27497	-0.900306	3.37915	-0.565833	-0.0723591	3.74345	-1.06933	-0.0795094
ENSG00000163584	RPL22L1	B	-3.05882	-3.73199	-1.57654	1.42799	1.30103	1.39229	1.48066	1.60408	1.1613
ENSG00000069188	SDK2	B	-2.83884	-2.81041	-2.6852	2.17836	0.481351	2.02089	1.80795	0.50917	1.33672
ENSG00000131747	TOP2A	B	-2.84515	-3.36028	-2.18545	1.9133	0.537441	1.86632	1.32124	0.950486	1.80209
ENSG00000104093	DMXL2	B	-3.24685	-4.03475	0.0215443	1.46885	1.92945	1.8306	0.49343	0.797667	0.740055
ENSG00000064666	CNN2	B	-3.93434	-3.41068	-0.0841536	1.68872	1.83208	0.948428	1.4231	0.78729	0.749555
ENSG00000102287	GABRE	B	-3.08396	-3.47782	1.54232	2.44307	1.43543	1.71196	1.03185	-0.967821	-0.635029
ENSG00000117632	STMN1	B	-2.91695	-4.02598	-1.01266	1.44079	0.741387	1.74128	1.07029	1.06702	1.89481
ENSG00000160161	CILP2	B	-2.71492	-2.63684	-2.35971	2.00913	3.10511	0.701391	1.77449	-0.101854	0.223206
ENSG00000166681	BEX3	B	-3.59925	-3.5677	-0.731433	1.79398	1.0496	1.63084	1.41049	0.865979	1.1475
ENSG00000260428	SCX	B	-2.1111	-3.29806	-2.93574	1.17659	1.32226	1.75427	0.750831	0.995894	2.34506
ENSG00000206315	PBX2	B	-0.423637	-1.41602	-0.58793	3.93135	-0.771723	-1.45626	3.54043	-1.44693	-1.36929
ENSG00000133302	SLF1	B	-1.75565	-3.15175	-1.43826	-0.772783	2.10294	3.47673	-1.12498	1.64682	1.01694
ENSG00000160200	CBS ENSG00000160200	B	-2.59152	-3.06609	-2.603	1.78965	-0.0393558	2.0479	1.52239	1.12778	1.81224
ENSG00000175063	UBE2C	B	-2.48556	-3.5542	-2.26494	1.41651	0.447179	1.60836	1.37564	1.19811	2.25891
ENSG00000120149	MSX2	B	-2.18339	-2.39566	-1.73113	1.84862	-1.22326	2.28098	1.85657	-1.31132	2.85857
ENSG00000128602	SMO	B	-2.59355	-3.93971	-1.63763	1.58193	1.14328	1.78625	1.41853	0.631052	1.60984
ENSG00000281151	KCNQ2	B	-2.55209	-2.28204	-2.55209	2.53712	1.98712	0.116359	1.94675	1.81104	-1.01218
ENSG00000188157	AGRN ENSG00000188157	B	-3.01153	-3.33974	-1.66421	2.5725	1.12467	0.945771	1.96928	0.721765	0.681503
ENSG00000040608	RTN4R ENSG00000040608	B	-2.69147	-2.88461	-1.33291	3.07674	-0.271392	0.490889	2.76622	-0.442292	1.28883
ENSG00000099849	RASSF7	B	-0.961507	-1.47455	-1.92707	3.20279	0.775695	-1.92707	3.23416	1.00463	-1.92707
ENSG00000072071	ADGRL1	B	-3.99573	-3.09833	-0.610263	1.15577	1.13546	1.79209	0.799964	1.1463	1.67474
ENSG00000235182		B	-1.71854	-1.71854	-1.71854	3.56799	1.6915	1.11074	2.22246	-1.71854	-1.71854
ENSG00000092096	SLC22A17	B	-2.91025	-3.32861	-2.01771	1.42214	1.23243	2.2386	0.898422	0.731857	1.73311
ENSG00000168468	ATF6B	B	0.348677	-1.38207	-1.38207	3.78042	-1.38207	-0.693078	3.47434	-1.38207	-1.38207
ENSG00000102409	BEX4	B	-3.55562	-3.62603	-0.476778	1.71344	1.23798	1.5757	1.33409	0.694347	1.10287
ENSG00000276845		B	-3.35843	-3.35843	-1.29652	1.81434	1.31657	1.95336	1.4029	1.09095	0.435259
ENSG00000187135	VSTM2B	B	-2.48688	-2.68527	-2.68527	1.73096	2.41861	1.49741	1.61059	1.27098	-0.671135
ENSG00000135406	PRPH	B	-3.45375	-3.1536	-1.45118	1.38222	2.18589	1.15458	0.677505	0.915414	1.74292
ENSG00000006042	TMEM98	B	-3.28042	-3.75759	-0.776264	1.31622	1.44016	1.83073	0.93464	0.853148	1.43938
ENSG00000090971	NAT14	B	-3.37974	-2.98379	-1.85247	1.47583	1.26246	1.96335	0.696648	0.941124	1.87659
ENSG00000120057	SFRP5	B	-2.30048	-3.20028	-1.27868	2.752	1.10713	-0.69508	3.10046	0.19143	0.323505
ENSG00000007516	BAIAP3	B	-2.35543	-2.28509	-2.22272	2.8897	0.826754	-0.188194	3.06626	1.119	-0.850274
ENSG00000135480	KRT7	B	-2.14665	-2.05549	0.394023	1.79069	-0.437033	-0.259853	0.85966	-2.32316	4.17781
ENSG00000232768		B	-0.722292	-3.37689	-3.37689	0.698972	2.28714	0.304777	2.19226	1.21083	0.782097
ENSG00000156508	EEF1A1	B	-3.97419	-3.36154	0.379579	1.06009	1.66267	1.24439	0.696396	1.48066	0.811946
ENSG00000021300	PLEKHB1	B	0.125327	-2.19082	-2.40167	2.66261	-2.72015	1.02695	2.55124	-0.719152	1.66566
ENSG00000130675	MNX1	B	-2.53612	-2.60332	-2.5141	2.51223	1.69187	0.421375	2.32156	1.18813	-0.48163
ENSG00000163682	RPL9	B	-2.62606	-3.22694	2.25729	-0.687098	0.327174	2.66738	-0.971796	0.0605644	2.19949
ENSG00000141934	PLPP2	B	-3.04768	-3.20517	-2.01523	1.98494	1.3294	1.74295	1.20372	0.878017	1.12907
ENSG00000132698	RAB25	B	-2.0487	-2.3521	0.229321	3.6201	-1.42848	-1.68124	2.68641	0.0311486	0.943538
ENSG00000026559	KCNG1	B	-2.88504	-2.98	-2.52121	1.74101	1.17298	1.78909	1.08484	1.04237	1.55594
ENSG00000133636	NTS	B	-1.6062	-1.38543	-0.437376	-1.12971	-1.6062	3.0216	3.84222	-1.6062	0.9073
ENSG00000149294	NCAM1	B	-2.01384	-2.66167	-3.14813	0.415713	2.39237	2.30233	0.0968933	1.08589	1.53044
ENSG00000229295	HLA-DPB1	B	1.09791	0.254872	-2.46468	3.27096	0.983412	-2.46468	2.25472	-0.671289	-2.26123
ENSG00000111057	KRT18	B	-2.71063	-1.99321	-0.497909	2.58711	-1.16115	0.578599	2.612	-1.80239	2.38757
ENSG00000285115		B	-2.34227	-2.34227	-2.34227	3.06961	0.204601	0.739679	2.81067	-0.707304	0.909558
ENSG00000070756	PABPC1	B	-3.33109	-3.66549	-0.0884255	0.53913	2.2524	1.17231	0.315739	1.82561	0.979803
ENSG00000106333	PCOLCE	B	-3.18756	-3.57261	-0.676211	2.53766	1.47337	0.686024	1.43614	1.02439	0.278806
ENSG00000117154	IGSF21	B	-2.98824	-3.26748	-1.73829	1.77413	1.71767	1.85816	0.863818	0.139928	1.64029
ENSG00000067840	PDZD4	B	-2.67303	-2.7676	-2.27972	2.40695	0.252545	1.77498	2.02891	-0.279555	1.53651
ENSG00000198053	SIRPA	B	-2.68372	-3.53154	0.13373	3.17891	0.847117	0.46975	2.14784	-0.387028	-0.175069
ENSG00000135903	PAX3	B	-0.365067	-1.72733	-0.738899	-0.709804	-1.06814	3.66325	-1.10354	-1.5692	3.61872
ENSG00000188153	COL4A5	B	-2.13605	-3.47548	-2.3811	1.59955	2.53198	1.32999	0.785196	1.20534	0.540571
ENSG00000164877	MICALL2	B	-2.50863	-2.11201	-0.466491	3.62697	0.0594601	-0.0102661	3.11195	-0.646023	-1.05496
ENSG00000282432		B	-3.40693	-3.40693	-0.329489	2.20601	0.0380211	1.56167	1.87942	0.638064	0.820168
ENSG00000254483	SUGT1P4	B	-2.73367	-2.73367	-2.73367	1.78306	0.750838	1.96923	0.907074	0.935534	1.85529
ENSG00000223760	MED15P9	B	-1.67146	-1.68979	-1.75416	2.64395	2.83906	-1.75416	1.93994	1.20078	-1.75416
ENSG00000109705	NKX3-2	B	-2.47264	-2.52373	-1.58766	-0.717329	0.608818	3.15393	1.42587	-0.525019	2.63776
ENSG00000258732		B	-2.5804	-2.5804	-2.5804	2.11031	2.18021	0.382694	1.66054	1.7095	-0.302062
ENSG00000185842	DNAH14	B	-2.27253	-3.71584	-2.01593	1.77429	1.04456	2.01333	1.41588	0.552925	1.20332
ENSG00000112280	COL9A1	B	-2.85816	-3.14467	-0.467294	2.47653	0.247261	1.10679	2.11873	-1.26901	1.78982
ENSG00000264148		B	-3.37171	-3.37171	-0.651484	1.82404	1.97844	1.53473	0.726849	0.0266559	1.30418
ENSG00000242265	PEG10	B	-2.69507	-3.36555	-0.462981	1.46065	1.39738	2.11546	1.11428	-1.55469	1.99052
ENSG00000164283	ESM1	B	-1.74176	-1.74636	-1.76034	2.61727	1.71891	3.50413	-1.04344	-1.61649	0.0680802
ENSG00000111249	CUX2	B	-2.88269	-2.86395	-2.3921	0.94869	2.17724	1.409	0.550824	1.49472	1.55826
ENSG00000075461	CACNG4	B	-2.94993	-3.00607	-2.11608	1.04941	1.24699	1.92766	1.11117	0.576267	2.16058
ENSG00000262636		B	-2.30034	-2.30034	-2.30034	0.223656	1.5505	3.78362	0.282404	-0.345445	1.40628
ENSG00000072832	CRMP1	B	-3.17511	-3.5624	-1.06992	1.03861	1.56889	1.76293	0.744449	1.21505	1.47751
ENSG00000185269	NOTUM	B	-1.68042	-2.51212	-0.894471	3.58815	-0.735509	0.0515298	2.7152	-1.66378	1.13143
ENSG00000187122	SLIT1	B	-2.03223	-1.90913	-1.84748	1.05396	-1.35054	3.08963	1.47097	-1.20222	2.72704
ENSG00000120327	PCDHB14	B	-2.77337	-3.04299	-1.93297	1.30627	1.08727	2.69316	0.892785	0.0152271	1.75463
ENSG00000219438	TAFA5	B	-2.42143	-2.43833	-1.38381	3.37177	0.83585	-0.494063	2.74015	0.649497	-0.859637
ENSG00000204556		B	-3.38574	-2.75474	-0.513605	1.19835	3.41183	0.806094	0.358212	1.18546	-0.305848
ENSG00000174938	SEZ6L2	B	-1.87818	-2.17718	-1.02848	2.34577	-1.74419	1.95197	1.83371	-1.81062	2.5072
ENSG00000184515	BEX5	B	-1.81614	-1.85576	-0.147231	3.31127	-1.687	0.296115	2.9877	-2.01531	0.926364
ENSG00000063180	CA11	B	-2.84212	-3.27389	-1.96673	1.96256	1.21703	1.78884	1.07264	0.825455	1.21622
ENSG00000277614	SCG5	B	-1.47846	-1.47846	-1.47697	1.41522	-1.47846	3.30659	-1.47223	-0.55312	3.21589
ENSG00000147180	ZNF711	B	-2.57447	-3.27772	-2.24315	1.76013	1.61403	1.91819	1.15152	0.848241	0.803242
ENSG00000084636	COL16A1	B	-2.82957	-3.00794	-0.766881	1.67618	3.16771	-0.258614	0.851012	1.70384	-0.535742
ENSG00000276180	H4C9	B	-3.23232	-3.05705	-1.18023	2.36795	0.465752	1.3617	1.95144	-0.0159962	1.33875
ENSG00000253846	PCDHGA10	B	-2.10565	-2.04434	-1.00493	1.09746	-1.12632	3.80476	0.706319	-1.55115	2.22385
ENSG00000196990	FAM163B	B	-2.871	-2.871	-1.91099	1.8104	1.16916	1.58567	1.35585	-0.479313	2.21122
ENSG00000163873	GRIK3	B	-2.91921	-2.87211	-1.87979	2.12459	1.1242	1.89361	1.48843	-0.433372	1.47365
ENSG00000079462	PAFAH1B3	B	-2.49246	-3.78665	-1.65019	1.42405	1.16811	1.4811	0.803565	1.35233	1.70015
ENSG00000100276	RASL10A	B	-1.13124	-1.41113	-1.8877	3.69632	-1.50955	0.965584	2.69578	-1.75276	0.334704
ENSG00000182916	TCEAL7	B	-2.84621	-2.74536	-2.39018	1.41696	1.07592	2.43429	0.669158	0.775486	1.60994
ENSG00000271365		B	-2.7809	-2.7809	-0.497055	1.69949	0.649048	3.25392	-1.14792	-0.15869	1.76299
ENSG00000215644	GCGR	B	-1.62172	-1.70095	-1.25717	3.56847	-1.00222	-0.465918	3.48343	-0.924892	-0.0790115
ENSG00000167646	DNAAF3	B	-2.42938	-2.46703	-1.65684	2.04585	-0.752206	2.35184	1.8429	-1.05631	2.12119
ENSG00000082684	SEMA5B	B	-2.6705	-2.64634	-2.01863	0.284073	2.94863	1.8815	0.0216007	1.82041	0.379248
ENSG00000159214	CCDC24	B	-2.54543	-2.77472	-1.81206	2.62684	0.262004	1.40365	2.16179	-0.812377	1.4903
ENSG00000185668	POU3F1	B	-1.67416	-2.03548	-1.86308	3.2777	0.692142	-0.436403	3.34812	-0.768631	-0.540207
ENSG00000186310	NAP1L3	B	-2.27004	-2.3098	-1.19056	2.99399	-0.895621	1.69845	2.29685	-1.56083	1.23756
ENSG00000164647	STEAP1	B	-2.75989	-2.91764	2.56847	2.43323	-0.531581	1.16244	1.52245	-0.941077	-0.536407
ENSG00000110811	P3H3	B	-3.34192	-3.15785	-1.31893	1.16476	1.68292	1.52967	0.644843	1.535	1.26151
ENSG00000100316	RPL3	B	-3.70986	-3.27051	-0.0387367	1.1846	1.68475	1.00832	0.607938	1.70656	0.826941
ENSG00000146233	CYP39A1	B	-1.85703	-3.26269	-2.33022	2.3415	1.4497	0.666114	2.38563	0.643491	-0.0364959
ENSG00000158106	RHPN1	B	-2.94846	-3.13718	-1.93124	1.45988	1.23338	1.60731	0.998372	0.896689	1.82124
ENSG00000066230	SLC9A3	B	-2.17392	-3.20159	-1.63171	2.60808	1.51845	0.00714368	2.29476	1.11817	-0.539393
ENSG00000178882	RFLNA	B	-1.78459	-3.18363	-2.3724	2.49992	0.370113	0.833677	2.42661	-0.0358216	1.24612
ENSG00000159307	SCUBE1	B	-2.71915	-2.59913	-1.7102	2.4958	0.0253333	2.15426	1.87589	-0.731542	1.20875
ENSG00000105255	FSD1	B	-2.3205	-2.60461	-2.60461	1.25241	-0.416782	2.29998	1.20129	0.918315	2.2745
ENSG00000107736	CDH23	B	-2.57932	-3.24141	0.484842	2.79128	0.277313	0.493413	2.71999	-0.508814	-0.437296
ENSG00000157890	MEGF11	B	-2.39925	-2.54027	-2.02454	2.68121	-0.0420155	1.65875	2.08235	-0.844522	1.42828
ENSG00000101463	SYNDIG1	B	-2.72824	-2.68267	-2.26572	1.63593	2.39971	1.31074	1.79611	0.33767	0.196472
ENSG00000181218	H2AW	B	-2.61544	-2.87174	-2.06061	2.28293	-0.00388867	1.4047	1.87238	0.201262	1.7904
ENSG00000113763	UNC5A	B	-2.16219	-2.1697	-2.05735	3.36295	-0.0192356	0.515912	2.82493	-0.214423	-0.080893
ENSG00000093072	ADA2	B	-0.762697	-1.88998	1.43629	3.39633	-1.29144	-0.85323	2.93356	-1.32825	-1.64059
ENSG00000137563	GGH	B	-3.06654	-3.35627	-0.07638	1.85345	-0.205404	1.76817	1.40461	-0.27683	1.95518
ENSG00000168779	SHOX2	B	-1.5155	-1.85954	0.508828	0.646314	-2.59367	3.18254	0.852628	-1.7096	2.488
ENSG00000050165	DKK3	B	-2.99345	-2.53695	-1.1808	2.49445	0.365606	1.29691	2.6672	-0.806809	0.693847
ENSG00000127418	FGFRL1	B	-1.88685	-3.77744	-0.623241	2.08318	-0.123211	1.88141	1.5343	-0.990682	1.90253
ENSG00000196739	COL27A1	B	-2.67704	-2.74235	-1.87382	2.58382	0.893792	1.44675	2.26221	-0.197171	0.303806
ENSG00000183186	C2CD4C	B	-2.24133	-2.51583	-2.78095	2.54705	1.38589	0.463473	2.06946	1.00332	0.0689088
ENSG00000100504	PYGL	B	-2.81611	-2.77022	3.52221	1.58779	-0.820653	0.329498	1.07304	-0.555657	0.450101
ENSG00000166394	CYB5R2	B	-1.65266	-2.48264	-0.443151	2.13398	-1.87854	2.03585	2.38917	-1.77474	1.67274
ENSG00000274950	RPS9	B	-1.33811	-4.41358	0.463673	1.56462	-0.637144	1.45027	1.81481	-0.583885	1.67934
ENSG00000283976	NA	B	-1.02796	-3.22566	-3.16821	1.76832	1.73453	1.86667	0.891899	0.237124	0.923286
ENSG00000165802	NSMF ENSG00000165802	B	-2.85377	-3.48553	-1.32654	2.03564	0.960469	1.28302	1.47543	0.888712	1.02257
ENSG00000075035	WSCD2	B	-1.91934	-2.15087	-1.75305	3.01185	1.4749	0.240835	2.81305	-0.267198	-1.45018
ENSG00000142634	EFHD2	B	-3.54732	-3.0955	-0.0415784	2.40001	0.883738	0.773102	1.68288	0.211119	0.733543
ENSG00000113205	PCDHB3	B	-2.2242	-2.09821	-1.17492	1.87406	-1.18669	2.78105	1.39865	-1.57923	2.20949
ENSG00000147381	MAGEA4	B	-2.03457	-2.23464	-2.23464	2.53323	2.07327	-1.2612	2.14388	1.26561	-0.250932
ENSG00000100314	CABP7 ENSG00000100314	B	-1.77143	-1.74661	-0.923297	3.63838	-1.22154	0.0291361	3.07855	-1.18507	0.101887
ENSG00000073792	IGF2BP2	B	-3.34	-2.9716	-0.674789	2.3488	1.437	-0.0593803	1.91467	0.782897	0.562408
ENSG00000105655	ISYNA1	B	-2.74893	-2.8144	-2.15875	1.83443	0.466112	1.77331	1.49935	0.319267	1.82961
ENSG00000162344	FGF19	B	-2.11138	-2.11138	-1.19037	2.43836	-1.62484	0.865626	2.82356	-1.03931	1.94974
ENSG00000123179	EBPL	B	-2.45419	-3.81171	-0.861958	0.668108	1.97281	1.49603	-0.0107406	1.70166	1.29999
ENSG00000177542	SLC25A22	B	-3.16201	-3.44223	-0.850266	1.71514	0.934879	1.52035	1.3263	0.778365	1.17947
ENSG00000141750	STAC2	B	-2.13756	-2.04417	-0.656138	2.79186	-1.70795	0.763289	2.4267	-1.42991	1.99389
ENSG00000229054	RPS29P14	B	-0.746629	-2.27299	-4.19889	1.53943	1.2237	1.10962	1.24703	1.316	0.782732
ENSG00000173727		B	-1.71526	-2.30735	-3.33457	1.35004	0.411089	2.89826	0.962985	0.68384	1.05097
ENSG00000100285	NEFH	B	-2.81482	-2.78525	-2.31284	1.29517	0.950524	2.0005	0.997936	1.11559	1.55319
ENSG00000141696	P3H4	B	-2.99109	-3.22022	-1.49582	1.12175	1.1995	1.84768	0.81967	1.06318	1.65535
ENSG00000163462	TRIM46	B	-2.35907	-2.43452	-1.94409	2.27635	-0.880557	2.01849	1.91514	-0.347315	1.75557
ENSG00000141738	GRB7	B	-2.51623	-2.51623	-2.01949	1.88372	0.31174	1.49925	2.33883	-0.817896	1.8363
ENSG00000113140	SPARC	B	-2.85585	-3.68918	1.76264	-0.556171	1.03311	0.906427	1.84319	1.25311	0.302716
ENSG00000177706	FAM20C	B	-0.993506	-2.17247	0.559947	3.01595	0.521271	-1.55317	2.82452	0.293628	-2.49616
ENSG00000171864	PRND	B	-1.90559	-2.04595	-2.02738	2.66045	1.09624	2.28384	1.65826	-1.94727	0.227402
ENSG00000052850	ALX4	B	-2.18189	-2.35763	-2.24991	2.24879	0.557955	1.92787	2.47413	-1.02499	0.605658
ENSG00000111664	GNB3	B	-1.88168	-2.95975	-2.61256	1.16327	2.43015	0.950732	0.374131	2.08994	0.44577
ENSG00000060709	RIMBP2	B	-2.15948	-2.26814	-2.17356	2.73219	2.37358	-0.735252	1.11063	1.545	-0.424962
ENSG00000231359		B	-1.63584	-1.63584	-0.326237	3.31109	-1.63584	0.0880569	3.17763	-1.63584	0.292813
ENSG00000157103	SLC6A1	B	-1.64449	-2.07505	-1.44523	3.59052	-0.633094	0.833901	2.0392	-1.83004	1.16428
ENSG00000277075	H2AC8	B	-2.76918	-2.8491	-0.76688	1.68364	-0.719163	2.22624	1.69927	-0.528587	2.02376
ENSG00000233018		B	-1.49565	-1.49565	-1.49565	3.33002	-1.49565	2.35959	2.00892	-0.220274	-1.49565
ENSG00000166803	PCLAF	B	-2.97194	-3.09346	-1.43825	0.477029	1.32196	1.14082	0.632395	2.09999	1.83146
ENSG00000181163	NPM1	B	-2.23838	-3.77673	-1.36761	1.3096	1.97942	0.911762	1.03315	1.74482	0.403972
ENSG00000196581	AJAP1	B	-2.17677	-2.41864	-2.2843	2.78811	0.809757	1.43734	2.1972	-0.763568	0.410866
ENSG00000092621	PHGDH	B	-3.22078	-3.71843	1.01572	0.495863	1.20358	1.25425	0.458818	1.16932	1.34166
ENSG00000165821	SALL2	B	-2.7263	-3.02304	-2.09416	1.44061	1.12707	1.83369	0.873698	1.0307	1.53772
ENSG00000134874	DZIP1	B	-2.98926	-3.16312	-1.54488	1.66127	1.57713	1.59001	0.945027	1.00794	0.915875
ENSG00000112977	DAP	B	-3.45779	-3.20509	0.230958	1.96152	0.375303	1.15344	1.89841	0.308746	0.734499
ENSG00000197083	ZNF300P1	B	-0.564121	-1.71342	-1.19812	2.85363	1.96495	-2.11094	2.09101	0.98298	-2.30597
ENSG00000127415	IDUA	B	-2.77527	-3.48763	-1.28819	1.84032	1.10116	1.48728	1.22312	0.68536	1.21385
ENSG00000136457	CHAD	B	-2.1518	-3.08107	-0.734284	2.18731	2.40471	0.0352961	2.25272	-1.18091	0.268042
ENSG00000196562	SULF2 ENSG00000196562	B	-3.3461	-2.84744	-1.05879	1.33265	1.35325	1.77311	0.367296	0.357984	2.06804
ENSG00000116661	FBXO2	B	-1.92176	-2.90006	-1.64536	2.38493	-0.378079	1.74819	1.80399	-1.01089	1.91904
ENSG00000184702	SEPTIN5	B	-2.41082	-3.09858	-1.94237	2.14167	0.525224	1.33584	2.13855	0.230797	1.07968
ENSG00000197558	SSPOP	B	-2.49641	-2.78125	-2.51623	1.41968	2.03815	1.53214	1.27104	0.678447	0.854437
ENSG00000038427	VCAN	B	-1.66398	-1.31002	1.59882	1.35288	-2.94377	2.64709	0.189202	-1.80913	1.9389
ENSG00000278828	H3C10	B	-2.00608	-2.11716	-1.24971	3.28192	-0.685571	0.507605	2.7185	-1.34889	0.899382
ENSG00000143590	EFNA3	B	-3.21243	-2.45769	-1.78181	1.47654	0.246966	2.3504	1.11229	0.645045	1.62069
ENSG00000166557	TMED3	B	-3.26149	-3.47487	-0.415334	1.41771	1.26487	1.19287	1.00577	1.1132	1.15728
ENSG00000105278	ZFR2	B	-1.91938	-1.9958	-2.04801	3.0478	-1.09616	1.90085	2.1926	-0.644762	0.562864
ENSG00000141570	CBX8	B	-2.36896	-3.0793	-2.01933	0.699193	2.20176	2.02969	0.154945	1.13163	1.25037
ENSG00000183018	SPNS2	B	-1.25167	-1.38463	0.871398	3.25551	-1.49207	-0.819596	2.96063	-2.22678	0.0872101
ENSG00000189423	USP32P3	B	-1.7011	-2.95571	-1.31547	2.53897	2.46051	-0.464769	1.42242	1.30044	-1.28529
ENSG00000115738	ID2	B	-3.09339	-3.67063	0.170943	0.958995	1.11809	0.8504	0.964089	0.686035	2.01547
ENSG00000134057	CCNB1	B	-2.85286	-3.18148	-1.66773	0.971611	1.15808	1.40546	0.928573	1.537	1.70135
ENSG00000235681		B	-0.561283	-4.09435	0.456805	2.29598	1.48727	2.20263	-0.457143	-1.22802	-0.101897
ENSG00000170421	KRT8	B	-2.60698	-2.75819	0.631488	1.96407	-1.25773	1.22414	1.15611	-1.03041	2.6775
ENSG00000285038	DEFB109D	B	1.18947	-2.50998	0.851358	2.38586	-2.50998	1.2546	0.121838	-2.50998	1.7268
ENSG00000120708	TGFBI	B	-3.70801	-2.76156	-0.183804	1.33895	0.355202	2.03069	0.884287	0.331667	1.71258
ENSG00000128683	GAD1	B	-2.50229	-2.50229	-2.35225	2.52927	1.52175	1.36278	1.53626	-0.111428	0.518198
ENSG00000139625	MAP3K12	B	-2.03734	-4.04185	-0.928975	1.93576	1.04087	1.66866	0.945502	0.271314	1.14606
ENSG00000147676	MAL2	B	-2.06054	-2.06054	2.34857	0.504689	-1.76046	1.70341	0.422878	-1.82062	2.72262
ENSG00000121454	LHX4	B	-1.6408	-1.76165	-1.59268	3.46477	-0.0869825	-0.412049	3.13677	-0.253762	-0.853606
ENSG00000108106	UBE2S	B	-2.55843	-2.70446	-2.21454	0.991353	-0.099132	1.25112	1.8864	1.32367	2.12401
ENSG00000042493	CAPG	B	-2.34027	-2.58023	3.09182	0.638944	-2.06476	1.07892	0.355152	-0.00644987	1.82688
ENSG00000076944	STXBP2	B	-1.92228	-2.30237	0.392113	3.11477	-1.48999	-0.136418	2.62291	-1.35664	1.07791
ENSG00000059588	TARBP1	B	-1.82045	-3.7245	-1.40542	2.50974	1.05835	1.54502	1.37503	0.19365	0.268572
ENSG00000116729	WLS	B	-2.92364	-3.32652	-0.988001	0.994361	1.19088	2.26575	0.909721	0.597007	1.28045
ENSG00000092421	SEMA6A	B	-2.3882	-3.48627	-1.56188	1.46245	1.92788	1.66079	0.683869	0.638495	1.06288
ENSG00000067445	TRO	B	-1.50159	-3.55601	-2.22553	1.6941	1.28049	2.10947	0.773988	0.230478	1.19461
ENSG00000172819	RARG	B	-2.49454	-3.54178	-1.33138	1.43291	1.26932	2.02705	0.940765	0.498729	1.19893
ENSG00000164294	GPX8	B	-3.27735	-3.41863	-0.0518233	1.58764	1.35055	1.53379	0.835408	0.820797	0.619618
ENSG00000197406	DIO3	B	-1.62771	-2.29823	-0.836357	3.21539	-1.15625	0.718001	2.13837	-1.72844	1.57522
ENSG00000108001	EBF3	B	-2.15009	-3.17801	-0.463196	2.34428	1.89449	-0.630518	2.04834	1.12312	-0.988402
ENSG00000137868	STRA6	B	-2.71261	-2.8403	-1.73726	2.21566	0.43692	1.50403	0.694609	0.333414	2.10554
ENSG00000240694	PNMA2	B	-2.64247	-2.67079	-1.93793	1.82568	0.052017	2.28914	0.968269	0.282894	1.83319
ENSG00000151892	GFRA1	B	-2.99511	-3.66319	0.452452	0.574928	1.96457	1.38362	0.407683	1.20586	0.669176
ENSG00000184009	ACTG1	B	-3.33155	-3.29946	-0.132862	0.696569	1.52077	1.63151	0.450112	1.19121	1.2737
ENSG00000064309	CDON	B	-2.93191	-3.36627	0.551061	0.812112	2.19231	1.85942	-0.584388	0.490291	0.977361
ENSG00000088992	TESC	B	-1.56738	-1.17502	-0.608209	3.4042	-0.605314	-0.562494	3.10633	0.138198	-2.13033
ENSG00000118707	TGIF2	B	-3.0199	-3.17553	-1.34409	1.18643	1.19624	1.62518	1.13168	1.09378	1.30622
ENSG00000131094	C1QL1 ENSG00000131094	B	-2.2148	-2.2148	-1.65761	2.24398	-1.07084	1.63423	2.25487	-0.836977	1.86193
ENSG00000100095	SEZ6L	B	-2.09482	-2.07741	-1.88701	1.7156	3.34087	0.542996	0.448569	1.37722	-1.36602
ENSG00000087116	ADAMTS2 ENSG00000087116	B	-3.01391	-3.34418	0.603106	2.21486	1.29849	0.999516	1.42988	0.314623	-0.502384
ENSG00000111674	ENO2	B	-3.28229	-2.47191	-1.09836	1.55187	-0.0975991	2.4218	0.879581	0.298395	1.79852
ENSG00000167941	SOST	B	-2.13602	-1.98992	0.511908	2.30601	-1.92667	0.650354	1.85299	-1.69867	2.43002
ENSG00000149633	KIAA1755	B	-1.12976	-1.0344	0.681171	-1.12834	-1.47761	3.58986	-0.470351	-1.81691	2.78633
ENSG00000198185	ZNF334	B	-1.64867	-1.84574	-1.32242	2.93383	2.09431	-1.95637	1.77377	1.11967	-1.14837
ENSG00000154277	UCHL1	B	-2.33356	-2.40745	1.03172	0.550316	-2.05737	2.13294	1.10172	-0.715918	2.69758
ENSG00000160963	COL26A1	B	-2.48277	-2.48277	-2.48277	2.15645	0.458392	1.38333	2.00103	0.82052	0.62857
ENSG00000161958	FGF11	B	-1.74094	-3.27268	-2.56733	1.51792	1.17103	1.6466	1.33965	0.950555	0.955205
ENSG00000147804	SLC39A4	B	-1.87858	-3.57374	-0.395943	2.47647	-0.407805	0.987027	2.1159	-0.62704	1.30371
ENSG00000185101	ANO9	B	-1.55637	-1.9892	-1.32994	3.01648	-0.655145	0.0165102	2.80278	-1.68706	1.38193
ENSG00000105722	ERF	B	-3.13128	-3.32854	-0.667755	0.727259	1.01489	1.48397	1.53234	1.07183	1.29728
ENSG00000244486	SCARF2	B	-2.7014	-3.44159	-1.21533	1.25118	1.68526	1.51484	0.797855	0.843727	1.26547
ENSG00000116157	GPX7	B	-2.19406	-3.8066	-1.31585	1.20965	1.60821	1.34003	1.05003	1.21377	0.894828
ENSG00000213983	AP1G2	B	-2.96604	-2.9114	-0.958272	2.24212	0.488092	1.28505	1.92559	-0.25687	1.15172
ENSG00000106723	SPIN1	B	-3.09959	-3.45734	0.162334	1.5239	1.06623	1.9037	0.615072	0.243945	1.04175
ENSG00000145147	SLIT2	B	-1.07953	-2.04939	1.09507	-1.50025	-1.91959	2.60044	1.15961	-1.17074	2.86437
ENSG00000167747	C19orf48	B	-2.92741	-3.27325	-1.1755	1.27975	1.19536	1.39706	0.651092	1.39999	1.45291
ENSG00000131188	PRR7	B	-2.3236	-2.66095	-2.29033	2.41025	-0.00911216	0.763279	1.88615	0.990507	1.2338
ENSG00000137801	THBS1	B	-3.03434	-2.53656	3.15924	-0.0977985	1.2592	0.505706	-0.610387	-0.159519	1.51446
ENSG00000163931	TKT	B	-3.30998	-3.10734	2.30375	0.328609	0.959393	0.675087	-0.168751	1.26234	1.05691
ENSG00000149257	SERPINH1	B	-3.20777	-3.4528	0.114072	0.830343	1.40441	1.56136	0.538322	1.08276	1.12931
ENSG00000285243	SLC39A4	B	-1.98543	-1.99168	-0.996071	3.19505	-0.703533	0.746274	2.71152	-1.50423	0.528094
ENSG00000115884	SDC1	B	-2.95361	-3.05352	-1.37533	1.37416	0.541944	1.52061	1.15068	0.961617	1.83346
ENSG00000117399	CDC20 ENSG00000117399	B	-2.78611	-3.02109	-1.62931	1.19487	0.761621	1.3788	1.0016	0.932732	2.16689
ENSG00000179242	CDH4	B	-1.60411	-1.6355	-1.61717	2.61017	1.58074	-1.44833	2.54468	1.22847	-1.65894
ENSG00000169855	ROBO1	B	-2.76965	-3.64195	-0.132498	1.12144	1.00916	2.25566	0.493524	0.653409	1.01091
ENSG00000189409	MMP23B	B	-2.8773	-3.01542	-1.46408	0.697765	1.54657	0.974628	0.704062	1.34789	2.08588
ENSG00000081059	TCF7 ENSG00000081059	B	-2.64817	-2.45167	-1.19926	2.55918	1.12007	-0.420707	2.73488	0.290763	0.0149029
ENSG00000119630	PGF	B	-2.31161	-2.57202	-1.30704	2.36178	1.09671	1.72141	2.13083	0.28364	-1.40369
ENSG00000143995	MEIS1	B	-2.42917	-2.69373	-0.69662	3.03719	-1.01482	0.662146	1.61041	-0.2064	1.731
ENSG00000104313	EYA1 ENSG00000104313	B	0.0364985	-1.65999	-1.63655	0.0165048	-1.52567	3.81193	-0.577066	-0.983926	2.51827
ENSG00000121904	CSMD2	B	-2.34958	-2.29823	-2.21992	1.21428	2.35186	2.60363	-0.154789	0.397181	0.455548
ENSG00000115271	GCA	B	-0.933107	-1.86758	1.17047	2.2288	-1.8966	1.76732	1.46594	-3.02401	1.08877
ENSG00000125398	SOX9	B	-1.83643	-3.42352	-1.46135	2.67362	0.340844	1.34638	1.29068	-0.283041	1.35282
ENSG00000182013	PNMA8A	B	-2.98595	-2.91858	-1.51652	1.02119	1.04699	1.96448	0.760891	1.11383	1.51366
ENSG00000002745	WNT16	B	-1.41012	-1.49899	-0.866658	0.620171	-1.49899	3.64874	-0.408885	-1.25737	2.6721
ENSG00000132821	VSTM2L	B	-2.69358	-2.34287	-0.691964	2.64014	-0.33415	1.27115	2.30486	-1.19527	1.04169
ENSG00000144857	BOC	B	-2.72188	-3.12413	-0.578358	2.01721	0.247375	1.98304	1.44802	-0.583096	1.31183
ENSG00000149256	TENM4	B	-2.7652	-3.24839	-1.01628	2.05887	1.4844	1.05523	1.1905	0.0461698	1.19469
ENSG00000059573	ALDH18A1	B	-2.95343	-3.41327	-0.643995	1.53193	1.0161	1.60952	0.994401	0.647504	1.21125
ENSG00000166794	PPIB	B	-3.41142	-3.32046	0.400718	1.30953	1.07117	1.06745	0.880317	1.00291	0.999788
ENSG00000170049	KCNAB3	B	-2.52857	-2.71558	-2.33612	1.39284	1.74844	1.08816	1.08747	1.59733	0.666028
ENSG00000134247	PTGFRN	B	-3.56359	-2.7052	-0.71116	1.01559	1.87744	1.27096	0.559004	1.21541	1.04154
ENSG00000203618	GP1BB	B	-3.0506	-1.88979	-2.19277	2.41631	0.503579	1.05999	1.95495	0.396565	0.801764
ENSG00000083857	FAT1	B	-3.19588	-2.9535	0.783538	0.746169	0.814136	2.74284	-0.137743	0.122894	1.07754
ENSG00000164692	COL1A2	B	-2.89696	-3.28908	-0.398107	1.47782	1.98454	1.28172	1.12536	0.990435	-0.27573
ENSG00000155660	PDIA4 ENSG00000155660	B	-3.00361	-3.43855	-0.258309	1.50966	0.621715	1.39806	1.13525	0.488934	1.54686
ENSG00000169255	B3GALNT1	B	-2.95122	-3.26345	-0.866342	1.12203	1.22343	2.02079	0.779322	0.881006	1.05445
ENSG00000007038	PRSS21	B	-2.63064	-2.90193	-1.7382	1.47115	1.83248	0.392805	1.40288	1.82058	0.350871
ENSG00000197238	H4C11	B	-3.39532	-2.82436	0.20628	2.45147	0.134862	0.760639	1.63476	0.31516	0.716511
ENSG00000109956	B3GAT1	B	-2.27903	-2.41363	-2.34105	0.347699	2.59147	1.5999	-0.0983632	1.58706	1.00595
ENSG00000178498	DTX3	B	-2.6174	-2.42859	-2.59244	1.48402	1.28307	1.48193	1.36892	0.952466	1.06802
ENSG00000154319	FAM167A ENSG00000154319	B	-2.23572	-2.20851	-1.44248	2.71908	-1.1704	1.28687	2.10945	-0.565248	1.50695
ENSG00000187260	WDR86	B	-2.72326	-3.08839	-0.47291	2.7248	0.542743	0.614204	1.92471	-0.134244	0.612352
ENSG00000054179	ENTPD2	B	-1.10672	-2.0031	-1.29809	3.09086	-1.41842	0.107584	2.86098	-1.26659	1.0335
ENSG00000173894	CBX2	B	-2.70062	-2.41408	-2.09562	0.532759	1.60844	1.87155	-0.0913678	1.52299	1.76594
ENSG00000184867	ARMCX2	B	-2.65589	-3.16226	-1.59641	1.5521	1.17361	1.59942	1.36103	0.7332	0.995213
ENSG00000146083	RNF44	B	-2.14553	-3.31102	-1.88808	1.64026	1.90455	0.890472	1.07366	1.25962	0.576053
ENSG00000196557	CACNA1H	B	-2.55002	-1.99256	-2.4921	1.86034	1.63342	1.07631	1.7629	1.3278	-0.626077
ENSG00000198795	ZNF521	B	-3.1525	-3.05007	-0.308456	2.1354	0.692844	1.81926	1.09484	0.456838	0.311841
ENSG00000235956	PRRT1	B	-2.87473	-2.59308	-1.9076	1.84383	0.705008	1.9465	1.10206	0.693816	1.0842
ENSG00000101443	WFDC2	B	-2.43543	-1.98516	-0.272154	3.09053	-0.717587	0.663072	0.264327	-1.26464	2.65705
ENSG00000197415	VEPH1	B	-1.81185	-1.5638	-0.977975	3.36327	-0.926433	-0.0609454	2.89214	-1.3245	0.410104
ENSG00000167693	NXN	B	-0.419315	-2.72875	-2.48223	2.98304	-0.17332	0.798645	2.33318	-0.501929	0.19068
ENSG00000105894	PTN	B	-1.91143	-1.85949	0.0390046	1.52281	-1.43814	2.15077	1.67212	-2.33471	2.15907
ENSG00000166833	NAV2	B	-2.25108	-2.47871	-1.16149	3.10766	0.449557	0.879914	1.9724	-1.20325	0.685012
ENSG00000129465	RIPK3	B	-1.36084	-1.37338	0.504008	3.09372	-2.22782	1.21373	2.02286	-2.18122	0.308947
ENSG00000122585	NPY	B	-0.993135	-1.34635	-1.34635	1.85347	-1.34635	3.1049	-1.10429	-1.34635	2.52445
ENSG00000090376	IRAK3	B	-1.2281	-1.35673	0.964928	3.05384	-0.916268	-0.817717	3.12597	-1.49671	-1.32922
ENSG00000105270	CLIP3	B	-3.11005	-3.1856	-0.553679	1.23996	0.739439	1.58936	1.29281	0.499411	1.48834
ENSG00000058091	CDK14	B	-2.39058	-3.06063	-0.537429	2.53459	0.176888	1.76805	1.78067	-0.727432	0.455864
ENSG00000100479	POLE2	B	-2.16263	-3.95128	-0.456011	1.7493	1.29846	1.48209	0.671481	0.812128	0.556462
ENSG00000059915	PSD	B	-2.69653	-3.0614	-1.44778	0.856901	0.670693	2.04689	1.19808	0.79778	1.63537
ENSG00000135486	HNRNPA1	B	-2.60057	-3.41134	-0.936504	0.713858	1.8446	1.28073	0.547845	1.74717	0.814214
ENSG00000232045	EHMT2	B	-1.63735	-2.76201	0.740719	0.872529	-1.34881	2.44436	1.11265	-1.71319	2.29108
ENSG00000142949	PTPRF	B	-2.8272	-3.10813	2.89369	0.460769	0.344712	0.995533	0.0978055	-0.0248621	1.16768
ENSG00000234196	ZBTB12	B	-1.45408	-1.62625	-0.277264	1.347	-1.91719	2.69135	0.458396	-1.91719	2.69521
ENSG00000271490		B	-3.04739	-3.04739	-0.450778	1.4041	0.612732	0.295029	1.65278	2.13467	0.446236
ENSG00000142549	IGLON5	B	-1.88524	-1.90727	-1.651	-0.790284	-0.387538	3.04081	-0.199665	1.00796	2.77223
ENSG00000164953	TMEM67	B	-2.92607	-2.81496	-1.4048	1.28864	1.08161	2.21198	0.76154	0.520887	1.28118
ENSG00000129991	TNNI3	B	0.251741	-1.18441	-2.10833	1.77237	-2.15914	2.01143	1.77743	-2.13605	1.77495
ENSG00000203814	H2BC18 ENSG00000203814	B	-2.74132	-2.69918	-0.679465	2.56652	-0.00862365	1.67497	1.4236	-0.726268	1.18977
ENSG00000114993	RTKN	B	-1.98941	-3.14877	-2.22731	1.81671	1.16616	1.34659	1.3723	0.687809	0.97593
ENSG00000203685	STUM	B	-2.51291	-2.39883	-2.0307	2.4158	1.89094	0.836557	1.47307	0.267897	0.0581791
ENSG00000104177	MYEF2	B	-3.25789	-2.93811	-0.591204	1.24812	1.34348	1.71765	0.570803	0.468536	1.43861
ENSG00000153266	FEZF2	B	-1.06142	-1.15153	-0.925091	-0.179863	-1.14562	3.01826	-0.933729	-1.1618	3.54078
ENSG00000186895	FGF3	B	-1.26313	-1.26313	-1.26313	3.35633	-0.653084	-0.698522	3.23051	-0.90904	-0.536826
ENSG00000150556	LYPD6B	B	-1.64091	-1.78709	-0.514472	0.654349	-1.15065	3.49411	-0.0134106	-1.51297	2.47104
ENSG00000270822		B	-1.20058	-1.20058	-1.20058	-1.20058	1.24784	2.46466	-1.20058	-1.20058	3.49095
ENSG00000130827	PLXNA3	B	-2.66679	-3.07131	-0.925395	2.2502	0.572804	1.14182	1.87555	-0.0661308	0.889254
ENSG00000134285	FKBP11	B	-2.67569	-3.45236	-0.710828	0.813992	1.79052	0.848117	0.740425	1.61424	1.03158
ENSG00000141448	GATA6	B	-1.88909	-1.87187	-0.490747	-1.14249	1.29103	2.88667	-1.67145	0.274579	2.61336
ENSG00000282068		B	-2.32487	-2.32487	0.667083	1.99815	1.08517	2.34352	-2.32487	-0.104262	0.984964
ENSG00000183010	PYCR1	B	-1.67307	-3.3885	-1.68368	0.691005	0.834916	2.25687	0.405541	0.416622	2.14029
ENSG00000283890	NA	B	-0.682836	-3.80302	-0.283312	2.29297	1.46549	1.79121	0.865096	-1.35692	-0.288693
ENSG00000125354	SEPTIN6	B	-2.63974	-3.23876	-0.991063	0.454538	1.9823	1.3189	0.522514	1.69607	0.895231
ENSG00000011028	MRC2	B	-2.34898	-3.22422	-1.68831	1.0586	1.50597	1.80854	0.84155	0.976104	1.07073
ENSG00000087077	TRIP6	B	-2.88437	-3.46296	-0.112646	0.927624	1.19115	1.70728	0.546891	0.726784	1.36024
ENSG00000170837	GPR27	B	-2.16626	-2.88295	-2.2357	1.97929	1.02639	1.55589	1.33978	0.541124	0.842441
ENSG00000109861	CTSC	B	-0.975282	-2.70617	1.31068	2.9034	-1.41013	0.481183	2.35703	-1.16874	-0.791968
ENSG00000133216	EPHB2	B	-2.87577	-2.9292	-1.13817	1.83299	0.930381	1.08618	1.34793	0.084407	1.66123
ENSG00000105767	CADM4	B	-1.6051	-2.71581	-2.27902	1.70446	-0.213132	2.12542	1.0209	-0.147445	2.10972
ENSG00000162512	SDC3	B	-3.12161	-3.13916	0.256959	1.77963	0.0474857	1.23888	1.35283	0.225213	1.35977
ENSG00000134986	NREP	B	-0.898443	-3.61013	-2.2853	1.16686	1.83682	1.49915	0.483799	1.19562	0.611625
ENSG00000132854	KANK4	B	-2.38181	-2.47986	0.431143	2.70155	-0.492901	0.940693	2.5229	-1.0985	-0.143222
ENSG00000167244	IGF2	B	-2.63229	-2.74342	-1.93014	1.43215	1.11469	1.88558	1.19056	1.11856	0.564304
ENSG00000157992	KRTCAP3	B	-1.23927	-3.14924	-1.57799	2.67374	0.119134	0.492153	2.13909	-0.705172	1.24755
ENSG00000165973	NELL1	B	-1.9929	-1.9929	-0.533123	-1.17291	0.615345	2.88522	-0.90516	0.12387	2.97256
ENSG00000113209	PCDHB5	B	-1.8899	-2.34291	-1.62277	2.60288	1.45471	-0.860764	2.14063	1.24019	-0.722067
ENSG00000133740	E2F5	B	-2.48641	-3.11554	-1.60826	0.967896	1.35656	1.86649	0.660348	1.10298	1.25593
ENSG00000285057		B	-1.8681	-1.8681	-1.8681	1.04033	1.98493	2.1121	0.225625	-1.8681	2.1094
ENSG00000196576	PLXNB2	B	-2.87594	-3.39681	-0.158407	1.80589	0.8352	1.18979	1.1657	0.303771	1.13081
ENSG00000111752	PHC1	B	-2.12592	-3.41459	-1.39432	1.38141	1.83539	1.75249	0.330126	0.728442	0.906985
ENSG00000144810	COL8A1	B	-2.71527	-2.99234	-0.20478	-0.271541	1.36287	2.3929	-0.31741	1.29136	1.45422
ENSG00000143387	CTSK	B	-3.04003	-3.13575	1.86798	1.59213	0.870357	0.393742	1.30482	0.375364	-0.228618
ENSG00000052344	PRSS8	B	-1.84816	-1.98243	-1.06583	2.66909	0.303915	-1.2965	2.59322	-1.02821	1.65491
ENSG00000114923	SLC4A3	B	-2.38199	-2.7867	-2.15096	1.45335	0.568616	1.67883	1.41532	0.84051	1.36302
ENSG00000113368	LMNB1	B	-2.93235	-3.06047	-0.9599	0.694207	1.14358	1.36076	0.665495	1.78374	1.30493
ENSG00000122952	ZWINT	B	-2.60145	-3.14819	-1.32838	1.64126	0.440693	0.951086	1.60463	1.06904	1.37131
ENSG00000147889	CDKN2A	B	-2.61756	-2.61756	0.542063	3.01948	1.10205	-1.18989	1.31255	0.548441	-0.0995842
ENSG00000157456	CCNB2	B	-2.52514	-2.89467	-1.90777	1.00093	0.837598	1.22552	1.24062	1.36599	1.65692
ENSG00000258802		B	-1.9041	-1.9041	-1.9041	2.2574	1.4524	1.79956	1.59224	-1.9041	0.514788
ENSG00000243449	C4orf48	B	-2.88629	-3.04593	0.193925	1.93978	-0.313032	1.07968	1.62245	-0.142078	1.55151
ENSG00000129534	MIS18BP1	B	-2.79093	-3.30466	-0.603898	1.45153	1.80206	1.19763	0.778825	1.03095	0.438498
ENSG00000217275		B	-2.25114	-2.25114	-1.24928	1.99484	-0.788558	2.49042	1.41742	-0.908346	1.54578
ENSG00000170382	LRRN2	B	-2.30536	-2.72602	-2.22736	1.54721	1.64964	0.834355	1.74233	0.900701	0.584507
ENSG00000185567	AHNAK2	B	-2.55308	-2.01141	1.01718	2.65152	-1.30384	0.778766	2.14069	-1.34123	0.621398
ENSG00000076716	GPC4	B	-1.31323	-3.12168	-0.466604	1.74525	-1.22201	2.03448	1.53171	-1.1156	1.92768
ENSG00000130540	SULT4A1	B	-2.35603	-2.35603	-2.35603	1.15398	1.82946	2.04977	0.16643	1.31277	0.555686
ENSG00000180573	H2AC6	B	-2.05535	-3.06305	-1.00143	2.5386	0.176018	1.50988	1.7978	-0.654673	0.752196
ENSG00000115963	RND3	B	-2.20445	-3.41553	1.95133	-0.661199	1.04454	1.9082	-0.254406	0.228002	1.40351
ENSG00000166997	CNPY4	B	-2.59166	-3.21361	-0.880872	1.89837	0.615995	1.63097	1.39066	0.0651849	1.08498
ENSG00000129910	CDH15	B	0.979551	-0.833992	-2.48954	2.82138	-0.649297	-1.3985	2.90814	-0.723257	-0.614481
ENSG00000125430	HS3ST3B1	B	-1.80777	-2.38971	-1.86095	1.94207	0.147806	2.84357	0.301537	-0.770305	1.59375
ENSG00000272196	H2AC19	B	-1.76831	-2.98969	-0.466531	2.51211	-0.639566	1.23367	1.96172	-1.177	1.33359
ENSG00000106367	AP1S1 ENSG00000106367	B	-2.7044	-3.52916	-0.343659	1.25133	0.876596	1.4585	0.904622	0.760107	1.32606
ENSG00000284627		B	-0.353209	-2.20494	-2.20494	1.53976	1.38422	2.342	-0.023135	-2.20494	1.7252
ENSG00000136193	SCRN1	B	-3.04585	-2.85865	-0.0375742	1.99516	0.124028	1.82395	1.05302	-0.273389	1.21931
ENSG00000182841	RRP7BP	B	-2.51147	-3.00492	-1.4978	1.52243	1.89177	1.4931	0.490835	1.09455	0.521503
ENSG00000166669	ATF7IP2 ENSG00000166669	B	-2.75402	-2.75291	-1.67319	1.67409	1.06498	1.50131	1.44558	0.623162	0.870985
ENSG00000135502	SLC26A10	B	-1.27829	-2.83259	-2.61899	1.21352	2.28169	0.981361	0.368739	1.73977	0.144786
ENSG00000105707	HPN	B	1.50258	-1.30479	-0.744772	2.78831	-1.86846	-1.84828	2.55313	-1.2606	0.182889
ENSG00000114631	PODXL2	B	-2.49018	-3.12098	-1.54049	1.70061	0.908415	1.42081	1.01257	1.13646	0.972784
ENSG00000163482	STK36	B	-1.86702	-3.41118	-1.6489	1.49275	1.33649	1.80849	0.410204	0.599905	1.27926
ENSG00000014914	MTMR11	B	-2.76374	-2.43764	-1.59149	2.13981	0.728509	1.93763	1.09737	-0.145499	1.03505
ENSG00000145725	PPIP5K2	B	-2.43096	-3.48712	-0.516467	1.50549	1.5406	0.91308	1.79158	0.426323	0.257479
ENSG00000282630	YWHAEP7	B	-0.975908	-0.981998	-1.00564	3.63168	-0.749166	-0.972075	2.83105	-0.772292	-1.00564
ENSG00000273715		B	0.0567045	-1.37388	-1.37388	2.65459	-1.37388	1.06443	-1.37388	3.09365	-1.37388
ENSG00000175265	GOLGA8A	B	-2.46712	-2.74185	-0.459737	0.840654	2.7212	1.61736	-0.896701	1.35647	0.0297211
ENSG00000183971	NPW	B	-2.32669	-2.19389	-1.31917	0.193725	-0.00938248	2.65764	-0.534745	0.876412	2.6561
ENSG00000196747	H2AC13	B	-1.78882	-1.78882	-1.78882	2.83402	-0.889276	0.149941	2.81577	-0.359144	0.815148
ENSG00000154096	THY1	B	-3.64427	-2.45467	1.06921	1.24185	1.12121	1.7421	-0.268151	0.386103	0.806623
ENSG00000177990	DPY19L2	B	-2.0958	-3.39282	-0.878107	2.36498	1.19909	1.38647	1.2187	0.10519	0.092297
ENSG00000169100	SLC25A6	B	-2.72037	-3.21557	0.317911	0.130557	1.89642	1.15268	-0.348424	1.80496	0.981829
ENSG00000241484	ARHGAP8	B	-2.25296	-2.6049	0.496772	2.22476	-0.676082	0.132607	2.16275	-1.2862	1.80325
ENSG00000185522	LMNTD2	B	-1.4802	-1.49436	-1.39592	2.34274	-1.62754	1.53547	2.40312	-1.62754	1.34424
ENSG00000204681	GABBR1	B	-2.03237	-2.5503	-2.18814	2.09455	0.792917	1.89063	1.47335	-0.342972	0.862341
ENSG00000135451	TROAP	B	-2.20947	-2.97462	-2.08758	1.0629	1.26615	1.0618	1.25133	1.45913	1.17036
ENSG00000239672	NME1	B	-2.84697	-3.2575	-0.291953	0.884648	0.624703	1.58642	0.430789	1.13158	1.73828
ENSG00000152377	SPOCK1	B	-2.62648	-3.27803	-0.736105	0.20679	1.4072	1.72979	0.836172	1.314	1.14665
ENSG00000249799	SNRPCP13	B	-1.2226	-1.2226	-1.2226	2.39647	-1.2226	2.4795	2.45964	-1.2226	-1.2226
ENSG00000108797	CNTNAP1	B	-2.25152	-2.92074	-1.83444	1.10722	0.959083	2.00638	0.844172	0.386178	1.70366
ENSG00000140470	ADAMTS17	B	-2.12108	-2.71992	-1.658	0.34764	2.92235	0.99447	0.840008	1.37656	0.0179594
ENSG00000164611	PTTG1 ENSG00000164611	B	-2.71129	-2.73097	-1.63122	1.51525	0.368994	1.03499	1.39985	1.10456	1.64983
ENSG00000146151	HMGCLL1	B	-0.422004	-0.400358	-0.0350292	-1.51151	-1.31163	3.4261	-1.27198	-1.23673	2.76314
ENSG00000243279	PRAF2	B	-2.55652	-3.24284	-0.99018	1.75514	0.628946	1.48468	1.12603	0.53375	1.261
ENSG00000160471	COX6B2	B	-2.10383	-2.13307	-1.47815	2.14855	-0.564646	1.17828	1.94858	-1.0819	2.08619
ENSG00000185008	ROBO2	B	-2.08629	-2.13183	-1.10294	1.56081	-0.539804	2.12903	2.36194	-1.47887	1.28796
ENSG00000282501		B	-0.926957	-0.926957	-0.759525	-0.926957	-0.926957	3.89076	-0.926957	-0.926957	2.43051
ENSG00000204099	NEU4	B	-1.90687	-2.34233	-1.34223	2.53464	1.34766	-0.299578	2.34576	0.819726	-1.15678
ENSG00000162804	SNED1	B	-0.788199	-2.2771	0.377123	3.52917	-0.511087	-0.0955769	2.2199	-1.48547	-0.968756
ENSG00000103257	SLC7A5	B	-0.779191	-2.23439	-2.23901	2.69953	-0.847533	-0.00140986	2.76959	-0.0400664	0.672484
ENSG00000005961	ITGA2B	B	-2.37487	-1.50446	-2.21339	-0.660388	0.505488	2.51856	0.890788	0.426974	2.4113
ENSG00000020633	RUNX3	B	-2.48909	-2.40294	-1.17795	1.92167	1.54642	-0.548486	1.99998	1.62137	-0.470967
ENSG00000196155	PLEKHG4	B	-2.53212	-3.36942	-0.834103	1.20034	1.2415	1.3558	0.476373	1.07898	1.38265
ENSG00000168679	SLC16A4	B	-2.91339	-2.71322	-1.27094	1.95657	1.39579	0.958692	1.20264	0.669995	0.713856
ENSG00000138028	CGREF1	B	-1.8922	-3.28559	-1.88394	1.40378	0.900868	1.50575	0.975666	0.982629	1.29303
ENSG00000117139	KDM5B	B	-2.34959	-3.28095	-1.19546	1.18116	1.33173	1.91151	0.581662	0.790113	1.02982
ENSG00000115226	FNDC4	B	-2.30325	-2.30355	2.02746	1.03481	-1.31513	1.55501	0.987184	-1.50879	1.82626
ENSG00000181392	SYNE4	B	-1.85159	-2.24795	-0.881357	3.22657	-0.549878	-0.544553	2.455	0.472323	-0.078569
ENSG00000011332	DPF1	B	-2.16305	-2.10988	-1.73019	1.69542	-0.98803	1.85695	1.92372	-0.292873	1.80793
ENSG00000183337	BCOR ENSG00000183337	B	-1.8874	-3.11397	-1.19068	1.34091	0.227773	2.10375	0.996599	-0.534574	2.05759
ENSG00000174640	SLCO2A1	B	-2.13377	-2.74471	-0.609317	2.40425	2.16499	-1.33488	0.943806	0.689592	0.620044
ENSG00000013573	DDX11	B	-1.84902	-3.19696	-2.0297	1.56948	1.32106	1.30116	0.906555	0.941494	1.03592
ENSG00000005448	WDR54	B	-2.84327	-3.13854	-0.683723	1.4338	0.573231	1.3726	1.05941	0.828852	1.39764
ENSG00000086300	SNX10	B	-3.02284	-2.36139	3.18002	1.03348	0.146455	0.100383	0.633905	0.319841	-0.0298566
ENSG00000149328	GLB1L2	B	-2.2563	-2.49995	-1.91112	0.123457	1.9702	1.5583	-0.140588	1.34322	1.81278
ENSG00000162849	KIF26B	B	-2.44949	-2.47349	-2.01319	1.72546	1.92777	1.4756	0.555445	1.00924	0.242654
ENSG00000206380	SNHG32	B	-2.65597	-3.42135	-0.403013	1.38594	0.816917	1.45311	1.14351	0.66585	1.015
ENSG00000269437	NXF2B	B	-0.909869	-0.909869	-0.909869	3.58539	-0.909869	-0.909869	2.7837	-0.909869	-0.909869
ENSG00000169992	NLGN2	B	-2.38849	-3.34268	-0.997156	0.884302	0.909116	1.81885	1.05146	0.602435	1.46216
ENSG00000177519	RPRM	B	-1.64428	-1.64428	-1.37943	2.35048	-1.64428	0.910007	1.8775	-1.11663	2.29094
ENSG00000091129	NRCAM	B	-1.94351	-2.28403	1.66898	0.0885797	-1.64042	2.16814	-0.279135	-0.414756	2.63615
ENSG00000085741	WNT11	B	-0.907462	-2.38728	0.914349	2.93135	-1.40887	0.115969	2.23984	-1.81795	0.320058
ENSG00000116337	AMPD2	B	-2.95383	-2.95683	-0.873705	1.17493	1.22635	1.40428	1.14928	0.534277	1.29525
ENSG00000196781	TLE1	B	-1.98251	-3.51383	-1.224	1.34615	1.84933	1.277	0.683936	0.921488	0.64244
ENSG00000217801	ENSG00000217801	B	-2.56611	-2.33583	-0.675013	2.72438	-0.198464	0.681336	2.27643	-0.567057	0.660327
ENSG00000264538	SUZ12P1	B	-2.60039	-3.21132	-0.836551	1.51251	1.28096	1.71495	0.470562	0.643637	1.02563
ENSG00000109113	RAB34	B	-3.03456	-3.04923	-0.199922	1.37722	0.599324	1.22932	1.17642	0.310984	1.59045
ENSG00000189337	KAZN	B	-2.84446	-3.27661	0.128452	1.68478	1.27696	1.34367	0.91304	0.20013	0.574044
ENSG00000177732	SOX12	B	-2.36977	-2.84123	-1.94327	0.927473	1.35557	1.24959	0.83922	1.28699	1.49543
ENSG00000204628	RACK1	B	-1.82015	-3.54624	-1.11025	1.43948	1.833	0.402114	1.01231	1.59378	0.195967
ENSG00000182870	GALNT9	B	-1.62106	-1.57541	-1.54552	2.79937	0.21942	-1.26633	2.63398	1.25639	-0.900843
ENSG00000135069	PSAT1	B	-2.84251	-3.08622	-0.48854	0.613872	0.498581	1.69957	0.645604	1.20157	1.75807
ENSG00000219222	RPL12P47	B	-1.19972	-1.19972	-1.19972	2.84913	-1.19972	-1.19972	2.38594	-1.19972	1.96325
ENSG00000198720	ANKRD13B	B	-2.39013	-3.10516	-1.52143	1.0414	1.26817	1.59289	0.737503	1.3064	1.07035
ENSG00000166405	RIC3	B	-2.04668	-3.07355	-1.90746	1.60315	1.48976	1.42088	1.03588	0.69955	0.778468
ENSG00000278677	H2AC17	B	-1.96353	-1.96353	-1.96353	2.78193	-0.244137	-0.444029	2.37176	0.591691	0.833362
ENSG00000284947		B	-1.74498	-3.27135	-1.67198	0.352286	1.92417	1.58305	1.03545	0.317641	1.47571
ENSG00000137273	FOXF2	B	-2.41544	-2.49959	-1.51079	0.953116	0.754739	1.95442	-0.560012	1.05944	2.26412
ENSG00000117724	CENPF	B	-2.42854	-2.62514	-2.04347	1.1535	0.497021	1.72926	1.13447	1.11258	1.47031
ENSG00000161960	EIF4A1	B	-2.78907	-3.38618	-0.132849	0.745703	0.954732	0.80824	1.29189	1.31082	1.19671
ENSG00000162639	HENMT1	B	-2.73593	-2.63627	-1.01517	2.27679	1.21306	0.534583	1.83569	0.634455	-0.107217
ENSG00000131873	CHSY1 ENSG00000131873	B	-2.62389	-3.17473	-0.650306	0.47461	0.965709	2.18748	0.776725	0.732347	1.31205
ENSG00000104899	AMH	B	-1.47003	-2.06651	-2.42415	1.85148	2.51027	-0.680828	0.958539	1.63209	-0.31085
ENSG00000227113		B	-0.648592	-2.32937	-2.32937	2.21681	1.27641	2.31673	1.1868	-1.11549	-0.573932
ENSG00000167552	TUBA1A	B	-2.88195	-3.0019	-0.618277	0.77943	0.426011	1.52951	0.946782	0.943249	1.87715
ENSG00000244444	EGFL8	B	0.737192	-1.12135	-1.12135	3.21819	-1.12135	-1.12135	2.7727	-1.12135	-1.12135
ENSG00000221946	FXYD7	B	-1.42541	-2.39727	-1.0319	1.95516	-1.04794	1.98068	2.10276	-1.48279	1.34672
ENSG00000171848	RRM2	B	-2.66526	-2.73658	-1.44051	1.19331	0.171989	1.32935	1.28187	0.955925	1.9099
ENSG00000234523	NDUFB1P2	B	-2.20027	-2.20027	-2.20027	2.02669	2.17292	1.31503	-0.252548	0.520453	0.818275
ENSG00000137166	FOXP4	B	-2.43593	-3.67502	0.0377787	1.07432	1.24696	1.3735	0.73279	0.551382	1.09422
ENSG00000227460	SYNGAP1	B	-2.81028	-2.94861	-0.900492	1.71585	1.24382	1.65956	0.787992	0.566239	0.685914
ENSG00000185272	RBM11	B	-1.59926	-1.59926	-1.15025	2.56153	-1.51655	1.68027	1.90937	-1.59926	1.31343
ENSG00000213123	DYNLT2B	B	-2.02643	-3.32836	-1.49773	1.65465	1.31127	1.48726	0.727144	0.719299	0.952888
ENSG00000157193	LRP8	B	-2.69213	-2.72537	-1.38767	2.10936	0.690139	1.30178	1.3249	0.507397	0.871597
ENSG00000112175	BMP5	B	-1.12519	-1.14204	-0.748216	1.28901	-2.27372	2.29237	2.35533	-1.90392	1.25636
ENSG00000285471		B	-2.17432	-2.17432	-2.17432	1.71455	0.505625	1.96704	1.73517	-0.561905	1.16249
ENSG00000143797	MBOAT2	B	-2.82075	-2.57103	-0.882909	1.43016	0.734306	2.30623	1.0652	-0.416939	1.15572
ENSG00000095587	TLL2	B	-1.21392	-1.65475	-1.55671	3.00244	-1.11781	0.844983	2.46645	-1.35937	0.588679
ENSG00000140332	TLE3	B	-2.36504	-3.35287	-0.295078	1.54018	0.371644	1.59298	1.3515	-0.264162	1.42085
ENSG00000132718	SYT11	B	-2.06791	-2.04057	-0.939499	1.63832	-1.02216	2.54975	1.14667	-1.17005	1.90545
ENSG00000179178	TMEM125	B	-1.54426	-1.54426	-1.43324	2.83026	-0.669945	-0.432381	2.39481	-1.30942	1.70843
ENSG00000136826	KLF4	B	-1.2402	-2.87368	1.05919	0.992605	-0.41615	-2.07129	2.56138	0.310812	1.67734
ENSG00000170312	CDK1	B	-3.01669	-2.82507	-0.747102	1.30799	0.390787	1.6061	0.912398	0.954845	1.41674
ENSG00000250506	CDK3	B	-2.79331	-3.07106	-0.640851	0.859293	1.85362	1.31493	0.504685	1.15353	0.819165
ENSG00000129194	SOX15	B	-2.52219	-2.7726	-1.26912	2.06079	0.398193	0.93668	1.69915	0.0655812	1.40351
ENSG00000275993	SIK1B	B	-2.42949	-2.5262	-0.19659	1.18354	-1.15946	0.0776787	2.78746	0.691002	1.57206
ENSG00000134222	PSRC1	B	-2.43689	-2.44983	-2.18788	1.58852	0.895802	1.03553	1.39654	0.656283	1.50191
ENSG00000136449	MYCBPAP	B	-2.76961	-2.20185	-1.98207	1.59653	1.15377	1.73592	0.9851	0.325917	1.15629
ENSG00000136944	LMX1B	B	-2.21837	-2.4781	-1.62064	2.12759	0.454254	1.82816	1.90296	0.423002	-0.418853
ENSG00000226916	WDR46	B	-1.53801	-0.745844	0.761758	-1.53801	-0.188199	2.87879	-1.39836	-1.11839	2.88627
ENSG00000140836	ZFHX3	B	-1.40207	-2.67976	-1.21296	-0.486162	1.364	2.39222	-1.22649	1.12798	2.12326
ENSG00000145908	ZNF300	B	-2.65997	-2.80603	-1.41434	1.28437	1.75593	1.39189	0.680365	1.07247	0.695321
ENSG00000182704	TSKU	B	-2.57412	-3.04614	2.16378	-0.0771535	1.69353	0.895266	-0.561396	0.794395	0.711832
ENSG00000003137	CYP26B1	B	-2.84519	-2.52059	1.55743	1.62476	0.0327609	0.833001	1.77422	-1.28618	0.829792
ENSG00000239887	C1orf226	B	-2.05549	-2.23587	-0.988312	2.96798	0.242885	0.30852	2.49626	-0.398586	-0.337397
ENSG00000160360	GPSM1	B	-2.92669	-2.65458	-1.29558	1.61681	1.39406	0.942328	1.01061	1.07211	0.840944
ENSG00000273608	SRCIN1	B	-2.62052	-2.72148	-1.10036	1.8882	0.468563	1.7076	1.08886	-0.194255	1.48338
ENSG00000168268	NT5DC2	B	-2.74802	-3.03107	-0.96366	1.13774	0.883204	1.14359	0.849906	1.13405	1.59425
ENSG00000091136	LAMB1	B	-2.93556	-2.7416	0.108231	0.435346	1.95432	1.40366	0.0729899	1.83144	-0.128827
ENSG00000100767	PAPLN	B	-1.41945	-2.22439	0.725013	2.90126	-0.47102	-0.336816	2.66315	-1.39478	-0.442965
ENSG00000226345		B	-2.81337	-1.2269	-2.81337	1.2434	1.34686	0.79788	0.915536	1.41674	1.13323
ENSG00000105699	LSR	B	-1.31873	-2.13717	0.0904393	2.58765	-1.17447	-0.0474284	2.1209	-1.87168	1.75048
ENSG00000179403	VWA1	B	-2.2386	-2.44329	0.288269	2.80812	-0.0256268	0.667595	2.09509	-1.28469	0.133138
ENSG00000107147	KCNT1	B	0.936584	-0.900195	-2.25158	2.94971	-0.986717	0.574356	2.29478	-1.31152	-1.30542
ENSG00000138795	LEF1	B	-1.30457	-1.97824	-1.38966	1.16822	-0.694445	3.45583	-0.315876	-0.78048	1.83923
ENSG00000244405	ETV5	B	-2.53195	-3.26391	-0.634815	1.68764	0.57435	0.577744	1.50916	1.00006	1.08171
ENSG00000139178	C1RL	B	-2.73381	-3.29125	0.433803	1.80822	1.30348	1.06513	0.409333	0.227163	0.777928
ENSG00000137804	NUSAP1	B	-1.62133	-3.39089	-1.7863	1.33784	0.625879	1.22524	1.26169	0.984164	1.36371
ENSG00000231240	KLF2P1 ENSG00000231240	B	-1.56313	-1.56313	-1.56313	2.44184	2.69551	-0.948664	1.04196	0.89693	-1.43817
ENSG00000169436	COL22A1	B	-2.97802	-2.30759	-0.709311	1.55226	0.405671	0.538828	0.750698	0.0487812	2.69868
ENSG00000196476	C20orf96	B	-2.59236	-3.11083	-1.02482	1.01734	1.41965	1.37421	0.629447	1.1066	1.18076
ENSG00000104321	TRPA1	B	-1.36591	-1.02033	1.60858	1.52073	-2.36808	1.95808	0.99996	-2.43527	1.10223
ENSG00000138801	PAPSS1	B	-2.99813	-2.97372	0.0329297	1.58143	0.368294	1.58295	1.19913	0.257297	0.94983
ENSG00000234704	BRD2	B	-2.57773	-1.97506	1.21743	-0.440305	-0.409443	2.06984	-0.410281	-0.371819	2.89737
ENSG00000110076	NRXN2	B	-2.0587	-2.81163	-1.9442	0.823748	1.03543	1.97581	0.690897	0.572377	1.71627
ENSG00000090924	PLEKHG2	B	-2.50179	-3.07851	-1.26516	1.21745	1.44384	1.1623	1.12763	0.965962	0.928277
ENSG00000131459	GFPT2	B	-2.88538	-2.3994	-0.276197	1.80898	2.11569	-0.220816	1.03658	1.394	-0.573474
ENSG00000167004	PDIA3	B	-2.91493	-3.22833	0.010943	1.21736	1.12716	1.07049	0.807737	0.963657	0.94591
ENSG00000139438	FAM222A	B	-2.06758	-2.24954	-1.85043	2.45487	-0.0783057	0.724488	2.27328	-0.0963728	0.889591
ENSG00000099284	MACROH2A2	B	-2.29072	-2.86524	-1.84328	1.12997	1.1024	1.31087	0.873153	1.07139	1.51145
ENSG00000187867	PALM3	B	-2.24439	-2.08435	-2.07833	0.604399	-0.225409	2.21587	1.03385	0.582377	2.19599
ENSG00000114315	HES1	B	-1.83857	-2.87844	0.0145382	1.34581	-0.991969	1.02271	2.06281	-0.901043	2.16414
ENSG00000273554		B	-1.6806	-1.36203	-1.77027	2.42785	1.1993	-1.34752	2.1288	1.55909	-1.15462
ENSG00000239402	CYP4F62P	B	-1.55599	-1.5914	-1.2601	2.72676	2.47397	-0.502817	0.99202	0.603741	-1.88619
ENSG00000142945	KIF2C	B	-2.34109	-2.51376	-2.07763	0.985724	1.7508	1.1726	0.344357	1.42007	1.25893
ENSG00000187678	SPRY4	B	-2.39679	-3.38315	0.509739	1.31694	2.27639	0.624692	0.598467	0.344	0.109704
ENSG00000186806	VSIG10L	B	-1.95461	-2.09344	-0.532182	1.9082	-1.11992	1.98089	1.45863	-1.51502	1.86744
ENSG00000266173	STRADA	B	-1.91923	-3.4443	-0.589818	1.65364	0.558367	1.92998	0.686874	-0.28087	1.40536
ENSG00000198089	SFI1	B	-2.542	-3.11266	-0.948161	1.73511	1.00015	1.2566	1.18468	0.480984	0.945292
ENSG00000119969	HELLS	B	-2.43002	-2.44486	-2.11877	1.37988	0.626823	1.45512	0.909124	1.07279	1.54991
ENSG00000183421	RIPK4	B	-2.25347	-2.32475	-2.01945	1.78018	0.191374	1.13314	2.20294	0.18643	1.10361
ENSG00000130518	IQCN	B	-1.8872	-3.14005	-1.74097	0.521956	1.71742	0.890429	0.822566	1.52349	1.29236
ENSG00000269190	FBXO17	B	-2.75334	-3.23062	-0.260126	0.880567	1.15221	1.52715	0.837759	0.612233	1.23416
ENSG00000182195	LDOC1	B	-3.13441	-2.2213	-0.424156	2.08805	0.0575127	1.06022	1.71141	-0.402937	1.26561
ENSG00000143228	NUF2	B	-2.56035	-2.43446	-1.69987	1.62708	0.228824	1.57506	1.34586	0.289173	1.62869
ENSG00000277443	MARCKS	B	-2.21735	-3.34349	-0.377877	-0.0158691	1.50741	1.5903	0.0155535	1.41733	1.424
ENSG00000164638	SLC29A4	B	-2.68222	-2.76259	2.60298	1.15857	-0.339585	0.746917	0.574244	-0.311949	1.01363
ENSG00000164778	EN2 ENSG00000164778	B	-1.64398	-2.12638	-2.14637	1.66312	1.71582	0.388104	1.91241	1.47609	-1.23881
ENSG00000145217	SLC26A1	B	-1.9266	-3.35407	-1.32187	1.21677	1.2915	1.43145	1.25798	0.162324	1.24253
ENSG00000144730	IL17RD	B	-2.51008	-2.53277	-1.55258	0.858221	2.20006	1.49564	0.0271841	1.16608	0.848235
ENSG00000109062	SLC9A3R1	B	-2.45925	-2.28219	-0.110335	2.46023	-0.0678554	-0.0952376	2.43582	-0.873887	0.992708
ENSG00000067606	PRKCZ	B	-2.19954	-2.1701	-1.21154	2.60977	-0.221079	0.229505	2.49833	-0.36939	0.834052
ENSG00000273859	RASSF7	B	-2.04886	-1.72376	-0.479594	1.07126	-1.19182	2.3244	1.41839	-1.61069	2.24068
ENSG00000085276	MECOM	B	-1.63639	-2.01492	0.106592	1.97113	-1.18917	2.06533	1.36939	-2.14779	1.47583
ENSG00000272636	DOC2B	B	-2.21456	-2.07225	0.525677	2.72927	-1.14787	0.19581	2.47269	-0.724564	0.235795
ENSG00000281618	IFITM10	B	-0.310184	-1.74995	1.26563	3.54806	-1.65463	1.19379	0.296724	-1.28289	-1.30656
ENSG00000124191	TOX2	B	-2.0967	-2.15496	0.258433	2.64806	-0.545939	0.226154	2.74897	-0.941621	-0.142406
ENSG00000105613	MAST1	B	-2.27117	-2.36575	-1.50684	1.61415	-0.62332	1.80082	1.48547	0.00684752	1.8598
ENSG00000182871	COL18A1	B	-2.81884	-2.44681	-0.836332	2.27451	1.45007	0.629277	1.36834	0.767455	-0.387681
ENSG00000198673	TAFA2	B	-1.83267	-3.12613	-1.10069	1.90798	0.9461	1.98836	0.477269	1.25861	-0.51884
ENSG00000266865		B	-3.08567	-2.64877	-0.402497	1.60979	1.21895	1.74778	0.648975	0.13827	0.773173
ENSG00000149243	KLHL35	B	-2.20698	-2.44541	-1.80037	2.30763	0.417322	1.75059	1.42107	0.209379	0.346759
ENSG00000198075	SULT1C4	B	-2.11019	-2.77723	-1.91317	1.23668	1.81535	1.3432	1.08298	1.05302	0.269364
ENSG00000163421	PROK2	B	-2.00092	-1.73298	-1.87042	2.63848	-0.001555	0.251123	2.51117	-0.571856	0.776965
ENSG00000125841	NRSN2	B	-2.86801	-2.81654	-0.686812	1.45504	0.570659	1.65845	0.959402	0.356585	1.37122
ENSG00000099364	FBXL19	B	-2.70538	-3.06727	-0.740108	1.2143	1.0496	1.54973	0.728249	0.875912	1.09498
ENSG00000139318	DUSP6	B	-1.58527	-3.31008	1.17815	2.05098	0.273622	-0.58858	2.18592	-0.581656	0.37692
ENSG00000214050	FBXO16	B	-2.01774	-2.6257	-1.50513	1.92747	-0.35696	1.74128	1.30776	-0.170112	1.69915
ENSG00000166448	TMEM130	B	-2.28613	-2.16537	-1.1532	1.75035	-0.324052	2.61517	0.881085	-0.769605	1.45175
ENSG00000141510	TP53	B	-2.43516	-3.19247	-1.02411	0.959055	1.11435	1.34397	0.816642	1.21781	1.19991
ENSG00000180596	H2BC4	B	-2.19741	-2.71405	-0.0215579	2.34753	-0.279278	1.62396	1.42713	-1.15004	0.96372
ENSG00000234465	PINLYP	B	-3.00685	-2.80327	-0.630214	1.60413	1.07649	1.14613	0.762836	0.735972	1.11477
ENSG00000159247	TUBBP5	B	-1.52225	-1.60849	-1.34987	2.53546	-1.35771	0.701068	2.49749	-1.1606	1.26489
ENSG00000176387	HSD11B2	B	-1.94959	-2.41297	-0.475735	3.01717	-0.134829	0.242906	2.0427	-1.00559	0.675934
ENSG00000133401	PDZD2	B	-2.03327	-2.91342	2.52309	2.03428	0.485176	-0.2712	0.957856	-0.448682	-0.333828
ENSG00000137857	DUOX1	B	-1.56421	-3.04183	-1.88216	0.710983	2.40437	1.20318	0.824945	0.892254	0.452466
ENSG00000105472	CLEC11A	B	-2.40915	-2.99095	-0.871413	2.08958	1.28487	0.209685	0.889209	0.32187	1.4763
ENSG00000125378	BMP4	B	-1.47189	-2.76973	-0.71718	0.567741	0.327607	3.03658	-0.0944562	-0.850601	1.97192
ENSG00000183837	PNMA3	B	-2.1923	-2.53679	-2.09818	1.20364	1.01682	1.79929	0.353633	1.04209	1.4118
ENSG00000224242	BTNL2	B	-2.29758	-1.59562	-2.29758	1.60957	1.85704	-0.723313	1.87403	0.517744	1.05571
ENSG00000116001	TIA1	B	-1.35681	-3.78303	-0.574487	1.53476	1.66474	1.499	0.249264	-0.0213841	0.787957
ENSG00000020181	ADGRA2	B	-2.87873	-2.95854	-0.223079	1.13845	1.81229	1.05129	0.702996	1.09676	0.258576
ENSG00000135052	GOLM1	B	-2.6876	-3.05898	-0.663558	1.12413	0.83352	1.65798	0.690769	0.806526	1.29721
ENSG00000111206	FOXM1	B	-2.48938	-2.73665	-1.56975	0.713203	1.05247	0.841439	1.03477	1.55337	1.60053
ENSG00000206281	TAPBP	B	0.283302	-1.38284	-1.1917	2.80916	1.06497	-2.20487	2.00789	0.360038	-1.74595
ENSG00000240184	PCDHGC3	B	-2.54263	-3.1986	-0.547557	1.48359	1.52121	1.23314	0.696251	0.867553	0.487047
ENSG00000103187	COTL1	B	-3.18289	-2.54847	1.82439	0.475124	0.875564	1.46107	-0.286996	0.261541	1.12068
ENSG00000142303	ADAMTS10	B	-2.73166	-2.9233	-0.899573	1.14832	1.27693	1.60014	0.90907	0.741201	0.878878
ENSG00000273802	H2BC8	B	-2.37689	-2.37689	-1.25451	1.25305	-0.251655	2.48899	1.19679	-0.191984	1.5131
ENSG00000110400	NECTIN1	B	-2.5062	-3.01633	-0.907732	1.73624	1.13387	0.997859	1.56657	0.434231	0.561499
ENSG00000187498	COL4A1	B	-1.95271	-2.51878	1.90806	0.723005	1.68742	1.80069	-1.54712	0.854312	-0.954885
ENSG00000272602	ZNF595	B	-1.98387	-2.77119	-1.1116	1.27453	2.34412	0.101153	0.718865	1.92343	-0.495432
ENSG00000160691	SHC1	B	-2.12597	-3.02545	-0.25512	2.39064	0.00247172	1.37245	1.59799	-0.493717	0.536711
ENSG00000197457	STMN3	B	-2.92825	-2.69893	-0.672744	1.42476	0.964994	1.57434	0.225579	0.614783	1.49548
ENSG00000162738	VANGL2	B	-2.29125	-2.88405	-1.53101	1.13023	1.40892	1.67569	0.685327	0.519525	1.28661
ENSG00000205581	HMGN1	B	-2.33427	-3.35812	-0.719152	1.46017	0.965242	1.16099	1.08308	0.748632	0.993418
ENSG00000158164	TMSB15A	B	-2.04057	-2.30858	-1.65642	1.36827	-0.582929	2.02628	1.15751	-0.0773906	2.11383
ENSG00000214455	RCN1P2	B	-2.21568	-2.87655	-1.55157	1.8882	1.55406	1.20102	0.706435	0.671152	0.622927
ENSG00000066248	NGEF	B	-0.283605	-1.87925	-1.88281	2.591	-0.928517	0.990722	2.76828	-0.677043	-0.698784
ENSG00000076382	SPAG5	B	-2.24179	-2.91122	-1.67482	1.35412	1.09078	1.04731	0.879914	1.04498	1.41071
ENSG00000273656		B	-2.30266	-3.23373	-1.01893	1.18117	1.46793	1.10326	0.758047	1.14659	0.898335
ENSG00000157388	CACNA1D	B	-1.92139	-2.48439	-2.26671	1.18016	1.49832	2.00524	0.433842	1.09607	0.458861
ENSG00000274488	LY6H	B	-2.30639	-2.48721	-1.29055	1.67636	1.36906	2.3953	-0.20882	0.0847968	0.767463
ENSG00000158050	DUSP2	B	-1.58292	-2.28717	-1.66722	0.913112	-0.221726	-0.514584	3.06739	0.639711	1.65341
ENSG00000161082	CELF5	B	-1.84079	-1.63894	-1.76031	1.56577	-1.22892	1.95673	1.74261	-0.714808	1.91864
ENSG00000184163	C1QTNF12	B	-1.90544	-2.31573	-1.60996	2.0565	-1.07742	1.49828	1.82958	0.281612	1.24259
ENSG00000070669	ASNS	B	-2.83471	-2.53986	-1.23998	1.34461	1.18742	1.76012	0.69874	0.67981	0.943854
ENSG00000275609		B	-2.04742	-2.04742	-2.04742	0.665827	2.15428	2.08871	0.639797	-0.588707	1.18235
ENSG00000275031	METRNL	B	-3.28882	-2.37547	1.33419	1.64692	0.274403	1.03357	1.39593	0.208522	-0.229241
ENSG00000182472	CAPN12	B	-2.41142	-2.23352	-1.4549	2.23114	-0.242587	1.39207	1.72012	-0.125233	1.12433
ENSG00000215367	TMED11P	B	-2.3237	-2.3237	-1.31898	1.32285	0.957628	2.63412	-0.240618	-0.0858018	1.37821
ENSG00000148737	TCF7L2	B	-2.37183	-2.79542	0.167328	2.4027	0.255237	0.657344	2.07046	-0.253006	-0.132803
ENSG00000173950	XXYLT1	B	-2.83911	-2.9063	-0.65828	0.895594	1.516	1.13257	0.794993	0.981876	1.08266
ENSG00000174705	SH3PXD2B	B	-2.65688	-2.82057	-0.888945	1.08419	2.10154	1.01052	0.463219	0.861359	0.845561
ENSG00000165238	WNK2	B	1.34461	-1.27703	-3.33518	2.38932	-0.146341	-0.332269	1.86526	-0.0663079	-0.442069
ENSG00000270443		B	-1.53754	-0.628576	-3.65925	1.51247	0.0368411	0.754544	1.67301	1.44804	0.400466
ENSG00000120324	PCDHB10	B	-2.3633	-2.4866	-1.4097	2.04686	1.84672	0.23842	1.38798	0.830398	-0.0907823
ENSG00000283706	PRSS50	B	-1.479	-1.479	-1.43256	2.93649	-1.30634	1.0914	2.09615	-1.10531	0.67817
ENSG00000140511	HAPLN3 ENSG00000140511	B	-2.23868	-2.22584	0.230617	1.45104	2.86423	-1.12257	1.40658	0.256464	-0.621841
ENSG00000135736	CCDC102A	B	-2.52919	-2.88317	-1.26973	1.10901	0.873415	1.39551	1.10284	0.887648	1.31365
ENSG00000206466	GABBR1	B	-2.6106	-1.90009	-1.70626	2.09997	0.635477	1.59614	1.49551	-0.502075	0.891943
ENSG00000126500	FLRT1	B	-2.06423	-2.01655	-1.687	2.54844	-0.345875	1.17049	1.79431	-0.542803	1.14321
ENSG00000235961	PNMA6A	B	-2.56039	-2.86503	-1.21481	1.45493	1.13873	1.40692	0.98272	0.769498	0.887443
ENSG00000095397	WHRN	B	-2.89935	-2.69406	-0.756344	1.43881	0.575776	1.31294	1.48295	0.430263	1.10901
ENSG00000184117	NIPSNAP1	B	-2.90657	-2.71394	-0.854427	1.21065	0.893578	1.33289	0.809776	0.782165	1.44588
ENSG00000241913	RPS29P21	B	-0.852688	-0.852688	-0.852688	-0.852688	-0.852688	3.69036	-0.852688	-0.852688	2.27845
ENSG00000270802		B	-2.12763	-2.12763	-2.12763	1.58452	0.185019	1.41464	1.78984	-0.177672	1.58654
ENSG00000227470	RPL39P16	B	-2.16301	-2.16301	-2.16301	0.627929	1.22046	2.10176	0.00842793	0.857683	1.67277
ENSG00000084774	CAD	B	-2.19705	-3.02776	-1.27736	1.58964	0.851459	1.69896	0.899366	0.402904	1.05984
ENSG00000074047	GLI2	B	-2.60535	-2.6505	-1.32827	1.43491	0.89711	1.2033	1.63189	0.322028	1.09489
ENSG00000094916	CBX5	B	-2.27988	-3.26758	-0.900296	1.39736	0.97257	1.2945	0.974349	0.923437	0.885536
ENSG00000004777	ARHGAP33	B	-2.39934	-2.37123	-1.86712	1.79876	1.05455	1.32916	1.15707	0.0661082	1.23203
ENSG00000179222	MAGED1	B	-1.64333	-3.47208	-1.26223	1.4854	0.758572	1.25383	1.45129	0.650296	0.778244
ENSG00000071564	TCF3	B	-2.41797	-3.09723	-1.01726	1.13341	0.87245	1.41349	0.91231	0.940342	1.26046
ENSG00000171004	HS6ST2	B	-1.80878	-2.11167	-2.31519	0.273532	0.321013	2.31446	0.450193	0.793494	2.08294
ENSG00000106462	EZH2	B	-2.32457	-3.04696	-1.25835	1.22007	0.962416	1.43093	0.911319	1.12512	0.980036
ENSG00000110328	GALNT18	B	-2.59129	-2.61422	-0.857326	2.08681	1.25396	0.591938	1.7525	0.363301	0.0143223
ENSG00000167157	PRRX2	B	-2.93627	-2.77335	0.362536	1.85908	-0.149983	1.23788	1.23539	0.374541	0.79018
ENSG00000123416	TUBA1B	B	-3.05162	-2.91878	0.144936	0.770171	0.963099	0.924114	0.716923	1.2404	1.21077
ENSG00000111676	ATN1	B	-2.15544	-3.45797	-0.505624	1.06706	1.58199	1.26739	0.66726	0.739419	0.795921
ENSG00000117519	CNN3	B	-3.17804	-2.69511	0.26395	0.902955	1.72938	1.18369	0.532205	0.690549	0.570419
ENSG00000155980	KIF5A	B	-1.7434	-1.77155	-1.58408	2.07119	-1.09202	2.21199	0.99023	-0.817236	1.73488
ENSG00000179051	RCC2	B	-2.75322	-2.89817	-0.733146	1.20011	1.02281	1.37141	0.618022	0.902762	1.26943
ENSG00000046604	DSG2	B	-1.25312	-1.94204	1.43745	1.64677	-1.98995	1.58563	1.00533	-1.97051	1.48044
ENSG00000133110	POSTN	B	-3.34396	-0.0829514	1.99873	0.622646	-1.83271	1.27608	0.950317	-0.825184	1.23703
ENSG00000277977		B	-2.91439	-2.91439	0.458971	1.81665	1.08102	0.850201	0.789619	0.803797	0.0285154
ENSG00000169231	THBS3	B	-2.34096	-2.89492	-0.917036	1.94586	0.434531	1.28723	1.57057	-0.00711975	0.921848
ENSG00000176595	KBTBD11 ENSG00000176595	B	-1.65923	-2.10301	0.276301	2.20894	1.19832	-0.946155	1.96371	1.09392	-2.03279
ENSG00000279208		B	-2.24687	-2.1425	-0.662378	1.39016	1.41435	2.91368	-0.705128	-0.550086	0.588781
ENSG00000237172	B3GNT9	B	-2.14757	-2.46085	-0.999254	2.16286	0.0235403	1.45576	1.73804	-0.914169	1.14164
ENSG00000174871	CNIH2	B	-2.51544	-2.20068	-1.68263	0.907891	0.327413	1.89916	1.23181	0.152054	1.88043
ENSG00000154640	BTG3	B	-2.76263	-3.15177	0.30962	0.810292	0.641398	1.55933	1.18767	0.555294	0.850798
ENSG00000113391	FAM172A	B	-2.85545	-2.83123	0.00675599	0.489298	1.54826	1.78708	0.105339	1.05014	0.699804
ENSG00000074696	HACD3	B	-2.43718	-3.2811	-0.433833	1.03078	1.26345	1.26803	0.515276	1.06784	1.00673
ENSG00000160460	SPTBN4	B	-1.64363	-2.88329	-1.70648	1.89403	0.312691	1.69247	1.11	-0.133721	1.35794
ENSG00000184254	ALDH1A3	B	-2.71344	-2.46193	-0.301935	0.97024	1.62057	0.275524	-0.445529	0.650528	2.40597
ENSG00000165801	ARHGEF40 ENSG00000165801	B	-2.55431	-3.24272	-0.214861	1.09036	1.31505	1.34643	0.592521	0.798499	0.869038
ENSG00000134259	NGF	B	-2.43909	-2.31497	0.172266	1.21674	-0.690427	2.832	0.229689	-0.423631	1.41742
ENSG00000109625	CPZ	B	-1.51861	-1.7283	-0.261452	2.8421	-1.04767	-0.743822	2.54418	-1.03958	0.953148
ENSG00000186654	PRR5	B	-2.73168	-2.6356	1.71054	1.99353	0.00397312	0.214754	1.22948	-0.463381	0.678379
ENSG00000134901	POGLUT2	B	-2.53096	-2.47572	-1.5063	1.51424	0.564092	1.77782	0.948673	0.305443	1.40272
ENSG00000215630	GUSBP9	B	-1.83357	-2.47665	-1.21474	1.08486	2.13384	0.878051	-1.10586	2.16522	0.368843
ENSG00000088325	TPX2	B	-2.04079	-2.62167	-2.05194	1.23435	0.650099	1.24997	1.12096	0.742326	1.71669
ENSG00000089685	BIRC5	B	-2.21989	-2.6212	-1.59599	0.970896	0.0643169	1.58968	1.12224	0.709247	1.9807
ENSG00000130477	UNC13A	B	-1.44367	-1.46057	-1.38341	2.15979	-1.17554	2.1439	0.09864	-1.2241	2.28497
ENSG00000175920	DOK7	B	0.754957	-0.759074	-2.06541	2.83138	-0.75092	-0.97052	2.65263	-0.65789	-1.03516
ENSG00000129007	CALML4	B	-2.25196	-2.97607	-0.286245	2.16384	1.26932	-0.295741	1.6809	0.286835	0.409115
ENSG00000244119	PDCL3P4	B	-1.36839	-2.49049	-1.92483	2.57666	0.565671	1.22992	1.74752	-0.370057	0.0340052
ENSG00000117595	IRF6	B	-1.25218	-1.41055	-0.600012	2.50761	-1.68409	0.581865	2.39658	-1.71055	1.17133
ENSG00000198715	GLMP	B	-2.1462	-3.3476	0.188781	1.83155	0.399681	1.45236	1.01208	-0.303489	0.912832
ENSG00000140931	CMTM3	B	-2.75792	-3.22907	0.720682	0.77733	1.20979	0.90064	1.03715	0.608361	0.733046
ENSG00000281417		B	-1.68543	-2.14814	-2.54914	1.43373	1.41325	2.11132	0.0778637	0.567189	0.779357
ENSG00000164616	FBXL21P	B	-2.11535	-2.16863	-2.031	1.1206	1.5859	2.41486	0.482022	0.345834	0.365774
ENSG00000272319		B	-2.12038	-2.12038	-2.12038	0.918171	2.29238	1.63253	0.984756	0.169243	0.364061
ENSG00000206120	EGFEM1P	B	-1.69414	-1.69414	-0.0863293	2.30619	-1.53476	1.19219	2.29172	-1.61052	0.829783
ENSG00000142235	LMTK3	B	-1.45167	-1.46287	-1.23498	2.27578	-1.41163	1.20222	2.20257	-1.48845	1.36903
ENSG00000148908	RGS10	B	-1.76901	-3.44849	-0.644692	1.89114	0.584757	1.1983	1.47203	0.54334	0.172622
ENSG00000282299		B	-0.857825	-0.857825	-0.857825	-0.857825	-0.857825	3.22761	-0.857825	-0.857825	2.77716
ENSG00000189120	SP6	B	-1.50401	-1.54098	-0.596981	2.82644	-1.27307	-0.447377	2.45943	-1.0614	1.13796
ENSG00000147394	ZNF185	B	-2.512	-2.76455	-1.12898	1.22686	1.67991	1.26628	0.965196	0.197731	1.06955
ENSG00000066735	KIF26A	B	-2.14242	-2.21577	-0.83838	2.3001	0.987027	-0.275999	2.3121	0.765459	-0.892112
ENSG00000198353	HOXC4	B	-3.35547	-1.72478	-0.0899161	0.0891307	2.29565	1.05754	-0.459499	0.999859	1.18748
ENSG00000146350	TBC1D32	B	-1.76485	-3.30726	-1.06043	0.791553	1.57586	1.73474	0.056403	0.97086	1.00312
ENSG00000074370	ATP2A3	B	-2.07372	-2.09398	-1.58282	1.50639	1.80072	-0.527511	1.80175	1.66395	-0.494788
ENSG00000233450	KIFC1	B	-2.00043	-2.33613	-2.33241	1.23759	0.631246	1.08476	1.14746	0.736357	1.83156
ENSG00000239912	RPL39P36	B	-2.11024	0.0216712	-2.11024	1.53293	-2.11024	1.60205	0.0480282	1.41196	1.71409
ENSG00000172339	ALG14	B	-2.30717	-2.25692	-0.4601	1.09019	2.45247	1.43774	-0.624855	-0.825955	1.4946
ENSG00000186523	FAM86B1	B	-1.61808	-2.75272	-2.02877	1.53725	1.72887	1.61807	0.240576	0.491774	0.783028
ENSG00000183092	BEGAIN	B	-2.05671	-2.43621	-0.74382	2.57242	-0.0146715	1.07994	1.64514	-1.01485	0.968748
ENSG00000260261		B	-1.17038	-3.55626	-0.366823	0.39827	1.17668	2.44638	1.02191	-0.446489	0.496712
ENSG00000116641	DOCK7	B	-2.56785	-3.12407	0.101538	1.11933	0.882689	1.20645	-0.0221142	1.66184	0.742209
ENSG00000187902	SHISA7	B	-1.81828	-1.84113	-1.61542	1.10503	-0.952372	2.87588	0.958126	-0.273611	1.56178
ENSG00000205571	SMN2	B	-2.4286	-1.8821	-1.82557	2.32954	0.698563	1.64772	1.30893	0.140629	0.010891
ENSG00000282339		B	-1.56163	-2.32648	-2.33595	0.783983	1.18557	2.19869	0.344832	0.022643	1.68835
ENSG00000090776	EFNB1	B	-2.35614	-3.14365	0.477118	2.04066	0.356798	0.793539	1.48999	-0.166429	0.508111
ENSG00000136205	TNS3	B	-1.79635	-2.6545	1.16514	2.12447	0.139693	0.841761	1.79508	-1.71932	0.104015
ENSG00000154856	APCDD1	B	-1.79296	-3.52423	0.215929	1.28766	2.21468	0.741836	0.36786	0.222121	0.267108
ENSG00000272398	CD24	B	-1.49442	-1.22969	0.248791	-1.37862	-0.380892	2.16275	-0.860047	-0.466926	3.39906
ENSG00000132563	REEP2	B	-0.652916	-2.80728	-2.19757	1.56964	-0.364802	1.54662	1.27534	-0.173183	1.80415
ENSG00000099365	STX1B	B	-2.63788	-2.53124	-1.38372	1.10414	1.42192	1.59024	0.850199	0.792505	0.793828
ENSG00000130508	PXDN	B	-2.74622	-3.0236	1.51429	0.98444	1.04099	1.30673	0.385506	0.274043	0.263824
ENSG00000280641	CDH4	B	-1.26657	-1.42862	-1.27942	2.37922	1.45755	-1.42984	2.0661	1.07804	-1.57646
ENSG00000073670	ADAM11	B	-2.26994	-2.43052	-1.32822	1.73166	0.806719	1.6028	1.73299	-0.610944	0.765448
ENSG00000015133	CCDC88C	B	-2.62145	-2.52641	-1.01839	2.13091	1.16521	0.872717	1.35143	0.266434	0.379547
ENSG00000182378	PLCXD1	B	-2.44004	-3.22951	0.142754	0.588849	1.07139	1.73114	0.237438	0.606601	1.29138
ENSG00000080007	DDX43	B	-0.989876	-0.831832	-0.324396	3.40888	-0.856167	-0.982787	2.46631	-1.04728	-0.84285
ENSG00000145194	ECE2	B	-1.21522	-1.21522	-1.21522	-0.954573	-0.687866	2.90035	-0.0512486	-0.478163	2.91717
ENSG00000187720	THSD4	B	-1.67827	-2.75914	-1.70791	0.455613	1.87922	1.5509	-0.112743	0.618915	1.75342
ENSG00000117114	ADGRL2	B	-1.74666	-2.63478	0.454379	0.109786	0.598251	2.79251	-1.09027	-0.300124	1.81691
ENSG00000127989	MTERF1	B	-1.91903	-2.68948	-0.458034	2.22739	-0.263792	1.80993	1.7295	-0.659731	0.223237
ENSG00000101977	MCF2	B	-1.8356	-1.91282	-1.66719	2.7684	0.541697	1.31483	1.48557	-1.02876	0.33386
ENSG00000064547	LPAR2	B	-2.58903	-2.37344	-1.41488	0.935242	1.3193	1.44622	0.40074	0.405098	1.87075
ENSG00000187240	DYNC2H1	B	-2.86777	-2.95838	0.184409	1.2203	0.828287	1.39507	0.789369	0.466385	0.94232
ENSG00000054392	HHAT	B	-2.58615	-2.50443	-0.880139	1.99697	0.892528	1.24774	1.35362	-0.404005	0.883865
ENSG00000153976	HS3ST3A1	B	-1.84736	-2.23477	-1.51031	0.604102	0.910917	2.67096	-0.861453	0.62495	1.64296
ENSG00000242531		B	-1.08752	-1.08752	-1.08752	2.9216	2.40345	-1.08752	1.20007	-1.08752	-1.08752
ENSG00000183801	OLFML1	B	-2.64388	-2.64633	-0.402698	1.53546	1.71754	-0.376161	1.17951	1.31986	0.316702
ENSG00000274100	NA	B	0.678106	-1.28729	-1.28729	-1.28729	-1.28729	3.2915	0.90778	-1.28729	1.55907
ENSG00000223624		B	-1.65215	-1.65215	-1.65215	2.23029	2.34729	-1.65215	0.590257	0.615694	0.825074
ENSG00000019549	SNAI2	B	-2.79167	-2.76674	-0.102217	1.95286	1.0492	1.26358	0.815563	0.284088	0.295334
ENSG00000139631	CSAD	B	-1.84515	-3.50145	0.328788	0.910986	1.74591	1.58769	0.127278	0.751866	-0.105918
ENSG00000156471	PTDSS1	B	-1.74708	-3.51438	-0.836307	0.765438	1.07249	1.45542	0.610927	0.984566	1.20892
ENSG00000125505	MBOAT7	B	-2.60122	-2.54869	-1.11411	1.46761	0.271587	1.49577	0.936636	0.447701	1.64471
ENSG00000011105	TSPAN9	B	-2.58483	-2.73405	-0.660099	1.75231	0.261159	1.01763	1.36761	0.132748	1.44752
ENSG00000119771	KLHL29	B	-2.25423	-2.27983	-0.44291	2.4991	1.09272	0.314084	1.95143	0.0765219	-0.956873
ENSG00000087245	MMP2	B	-2.88752	-2.81385	0.19929	1.0192	1.80362	0.660733	0.442283	1.16085	0.415387
ENSG00000160211	G6PD	B	-2.62514	-3.03489	1.13568	1.41936	-0.0600362	1.07287	0.951011	0.0238352	1.1173
ENSG00000236577	SNRPGP14	B	-2.04889	-2.04889	-2.04889	1.02887	2.17029	1.62788	0.0308144	-0.011576	1.3004
ENSG00000169071	ROR2	B	-2.12033	-2.2218	-1.52836	0.85646	0.333359	2.69439	0.193391	0.138581	1.65431
ENSG00000076864	RAP1GAP	B	-2.02867	-2.25385	-1.68887	2.20492	-0.174863	1.2132	1.74924	-0.0816396	1.06053
ENSG00000205129	C4orf47	B	-2.08512	-2.60838	-1.48032	1.91204	0.0382876	1.63066	1.16818	0.182751	1.24191
ENSG00000206488	ATAT1	B	-2.50008	-2.55636	-1.30315	1.63134	1.19126	1.68851	0.611903	0.484716	0.751865
ENSG00000262943	ALOX12P2	B	-1.7008	-2.55596	-1.94802	2.1524	1.13329	1.53611	1.00528	0.129273	0.248413
ENSG00000172992	DCAKD	B	-2.45765	-3.22471	0.289226	1.0262	0.570401	1.61917	0.538027	0.358084	1.28125
ENSG00000184363	PKP3	B	-1.364	-1.33489	-0.481017	2.94858	-1.41492	-0.806445	1.9029	-1.06345	1.61325
ENSG00000198901	PRC1	B	-2.65178	-2.87434	-0.705257	1.01196	0.89597	1.30622	0.633472	1.15252	1.23122
ENSG00000172478	MAB21L4	B	-1.08328	-1.42596	-0.958187	3.02701	-0.883803	-0.600114	2.5071	-1.2071	0.624334
ENSG00000181444	ZNF467	B	-1.91326	-2.91345	-1.60869	1.22698	1.55722	1.41763	0.475509	1.11427	0.643786
ENSG00000224564	HCG4	B	-1.77628	-1.94083	-1.5292	2.30963	-0.702485	0.982993	2.22762	-0.62617	1.05472
ENSG00000260596	DUX4	B	-1.7148	-2.88855	0.0370878	0.700473	-0.322485	2.87702	0.766599	-0.62875	1.1734
ENSG00000185015	CA13	B	-2.47942	-2.2232	-1.49852	1.90115	1.38998	1.5756	0.893977	-0.131512	0.571936
ENSG00000204256	BRD2	B	-0.995103	-3.62567	-1.29841	0.569909	1.66142	0.659528	1.06559	1.20976	0.752976
ENSG00000165046	LETM2	B	-2.02064	-2.33111	-0.911477	2.78747	0.994194	0.101574	1.76902	0.110072	-0.49911
ENSG00000250959	GLUD1P3	B	-1.29794	-3.10756	-0.69725	2.17981	1.95449	1.26335	0.417137	-0.157582	-0.554459
ENSG00000179241	LDLRAD3	B	-2.81742	-2.92388	0.133366	0.787103	1.51075	1.20604	0.444335	0.674923	0.984794
ENSG00000145687	SSBP2	B	-1.71723	-3.24552	-1.13737	1.17357	1.06244	1.87156	0.344856	0.490563	1.15713
ENSG00000152990	ADGRA3	B	-1.44927	-3.14967	-1.42612	1.11579	1.55094	1.79778	-0.0211766	1.17026	0.411447
ENSG00000116260	QSOX1	B	-1.57802	-3.06106	-0.154369	2.16812	-0.418339	0.850804	1.95588	-0.63578	0.872767
ENSG00000198856	OSTC	B	-2.54276	-3.12125	-0.19136	1.30871	1.0702	1.35494	0.776212	0.555413	0.789902
ENSG00000184445	KNTC1	B	-2.36603	-2.81595	-1.10125	1.06949	1.47145	1.65638	0.319524	0.971045	0.795335
ENSG00000172247	C1QTNF4	B	-1.70515	-1.57408	-0.602095	2.37241	-1.60327	1.00952	1.92072	-1.28725	1.46919
ENSG00000137573	SULF1	B	-1.3344	-1.15547	0.670512	0.123484	-1.36628	2.48294	-1.13636	-1.15254	2.86812
ENSG00000277156	TOMM40P1	B	-1.72892	-1.38576	-1.72892	2.51293	1.71141	-0.286095	1.72041	0.577504	-1.39257
ENSG00000259658		B	-2.76842	-2.87105	-0.0641639	1.15631	1.04832	1.50272	0.901986	0.0827267	1.01157
ENSG00000175170	FAM182B	B	-2.26175	-2.64958	-0.644741	0.465709	2.45686	1.48972	-0.430465	0.804593	0.769646
ENSG00000269113	TRABD2B	B	-2.28416	-2.27655	-1.30415	2.27302	0.719715	1.00041	1.34686	-0.659976	1.18484
ENSG00000149654	CDH22	B	-2.31972	-2.35101	-1.39277	1.49739	1.73886	0.130911	1.82435	0.979525	-0.107547
ENSG00000147689	FAM83A	B	-2.88309	-2.02561	2.91175	-0.0486327	0.502404	0.994369	-0.0860294	0.116845	0.517989
ENSG00000142694	EVA1B	B	-2.69602	-2.75855	-0.325888	1.84542	0.139824	1.05852	1.27648	0.41875	1.04147
ENSG00000145050	MANF	B	-3.18618	-2.38496	-0.382746	1.27236	0.42226	1.31577	1.00948	1.00031	0.933704
ENSG00000053108	FSTL4	B	-1.78516	-2.22156	-1.84116	1.4973	1.53947	2.13083	0.355608	-0.720397	1.04507
ENSG00000188227	ZNF793	B	-1.71644	-2.60848	-1.97306	1.8753	1.09931	1.74265	0.809447	0.261604	0.50967
ENSG00000214289	RPL39P5	B	-1.95435	-1.95435	-1.95435	1.75877	0.103483	1.65768	1.05389	1.89663	-0.607401
ENSG00000150540	HNMT	B	-2.12204	-2.13972	1.81185	1.67301	1.45054	-0.907102	1.11917	0.708347	-1.59405
ENSG00000276550	HERC2P2	B	-2.20112	-2.40288	0.157719	-0.158961	1.85372	2.13387	-1.30028	0.658716	1.25922
ENSG00000188613	NANOS1	B	0.745351	-3.02456	-0.102992	2.40573	-1.16966	0.394533	1.72326	-1.45896	0.4873
ENSG00000241749	RPSAP52 ENSG00000241749	B	-1.8313	-1.97076	-1.33691	2.86329	0.00620778	-0.76955	1.99757	0.597864	0.443584
ENSG00000168453	HR	B	-2.17316	-1.97058	-0.366967	2.58924	-0.649489	0.932949	1.77379	-1.17562	1.03984
ENSG00000163132	MSX1	B	-2.39086	-2.35636	0.547551	1.98095	1.61648	-1.32409	1.24415	0.933059	-0.25087
ENSG00000161682	FAM171A2	B	-2.16159	-2.20786	-1.72656	0.506534	0.773045	1.97595	0.29	0.352352	2.19814
ENSG00000101871	MID1	B	-2.32539	-2.33817	0.335309	1.37017	-0.401822	2.65449	0.00450411	-0.651519	1.35242
ENSG00000243364	EFNA4	B	-2.14305	-2.73564	-1.63129	1.34527	0.877324	1.4477	0.899617	0.695439	1.24463
ENSG00000054598	FOXC1	B	-2.82788	-2.39655	-0.0185366	2.17865	0.0430343	1.73554	0.205584	0.29916	0.781002
ENSG00000124813	RUNX2	B	-1.87325	-2.106	-0.958874	2.16635	0.287702	1.59641	1.3647	-1.66541	1.18836
ENSG00000146242	TPBG	B	-1.64843	-1.63922	0.151504	1.90932	-1.86563	1.08818	1.92935	-1.50609	1.58102
ENSG00000071575	TRIB2	B	-2.05694	-2.94707	-0.59119	0.626168	2.05635	1.36467	-0.490619	0.736379	1.30227
ENSG00000198753	PLXNB3	B	-1.03837	-1.7002	1.39331	2.78223	-0.711739	-1.12294	1.92132	-1.75039	0.226784
ENSG00000164808	SPIDR	B	-1.99414	-2.98411	-0.42581	0.822546	2.12477	1.94784	-0.0235001	0.39218	0.140227
ENSG00000159335	PTMS ENSG00000159335	B	-3.20928	-2.4291	-0.168007	0.910107	1.08733	1.19215	0.442047	1.05814	1.11661
ENSG00000153558	FBXL2	B	-2.47892	-2.6224	-0.609738	1.56182	0.12149	2.08338	0.930079	-0.0562509	1.07055
ENSG00000140688	RUSF1	B	-2.14495	-3.2678	-0.416688	1.50067	1.2628	1.2942	0.910856	0.32727	0.533641
ENSG00000169230	PRELID1	B	-2.50464	-3.17868	0.490788	1.53725	0.423143	0.415324	1.30961	0.809456	0.697755
ENSG00000114405	C3orf14 ENSG00000114405	B	-3.07839	-2.59732	0.205038	0.853602	0.416786	1.58853	0.790665	0.585463	1.23562
ENSG00000115828	QPCT	B	-1.65673	-1.95934	0.981752	-0.558919	-0.590119	1.93346	-0.773275	-0.447335	3.07051
ENSG00000182263	FIGN	B	-1.00671	-1.19733	0.220252	-0.102776	-1.53942	3.28866	-0.165973	-1.52682	2.03011
ENSG00000271672	DUXAP8	B	-2.58015	-2.58015	-0.955577	1.92536	0.381434	1.20065	1.27784	0.412953	0.91764
ENSG00000186340	THBS2	B	-2.23825	-2.33251	1.63255	-0.022385	-1.70908	1.01367	1.69698	1.35595	0.603085
ENSG00000225073	DDX39B	B	-0.708046	-3.82251	-1.10138	1.15438	1.27428	1.24541	0.774754	0.51941	0.663706
ENSG00000179218	CALR	B	-2.48987	-3.20669	0.0955567	1.03049	0.653039	1.23672	0.703566	0.688901	1.28829
ENSG00000134291	TMEM106C	B	-1.70207	-3.17332	-1.33469	1.72105	0.583311	1.0996	1.2002	0.533034	1.07288
ENSG00000277303	EPOP	B	-2.22221	-2.40207	-1.82243	0.820034	0.358451	0.868306	1.47112	1.25071	1.67809
ENSG00000111665	CDCA3	B	-2.22543	-2.74143	-1.57085	1.18017	1.19015	0.982363	1.16751	0.944129	1.07338
ENSG00000283777	CANX	B	-1.07188	-3.29177	-0.107166	2.53597	0.127419	0.446806	1.77923	-0.539882	0.12127
ENSG00000141433	ADCYAP1	B	-0.938567	-0.919837	-0.956066	0.523998	-0.90691	3.97513	-0.940803	-0.829307	0.992357
ENSG00000224106	CYP4F25P	B	-1.10777	-0.921129	0.219873	-0.192307	-1.5087	1.69181	-0.205196	-1.5087	3.53211
ENSG00000196220	SRGAP3	B	-2.44775	-2.86342	-0.866308	1.04338	1.75436	1.12886	0.814619	0.732863	0.703395
ENSG00000240771	ARHGEF25	B	-2.58125	-2.42281	-1.4579	1.41148	1.30045	1.33896	0.804198	0.816205	0.79067
ENSG00000116560	SFPQ	B	-2.07813	-3.36031	-0.541883	1.26945	1.13481	1.04154	1.00336	0.777197	0.753962
ENSG00000129038	LOXL1	B	-2.6835	-2.75425	-0.540503	1.52769	0.449716	0.460122	1.31033	1.24701	0.983376
ENSG00000182796	TMEM198B	B	-2.37834	-2.97585	-0.482165	1.57492	1.52498	1.27692	0.682861	0.628285	0.148402
ENSG00000273722	TMC4	B	-1.02315	-1.17858	-0.654975	2.20028	-2.01887	1.49308	1.70447	-1.84271	1.32045
ENSG00000005022	SLC25A5	B	-2.62036	-3.10981	0.108772	1.24219	0.562778	0.892235	0.976764	0.96493	0.982502
ENSG00000137807	KIF23	B	-2.4972	-2.42975	-1.5601	1.33263	0.554563	1.15787	1.32521	0.91751	1.19928
ENSG00000196368	NUDT11	B	-2.03348	-2.36465	-1.46778	1.60733	-0.129149	1.9036	1.12998	-0.252452	1.60661
ENSG00000156414	TDRD9	B	-0.985222	-1.28272	-0.33984	2.87186	-1.31647	-0.678586	2.85847	-0.70695	-0.420546
ENSG00000046653	GPM6B	B	-1.94951	-2.67774	-1.02366	0.242416	1.44855	2.18581	-0.547272	0.982003	1.3394
ENSG00000182759	MAFA ENSG00000182759	B	-0.246154	-2.28854	-2.56801	2.16293	-0.53653	0.841011	2.04595	0.089462	0.499887
ENSG00000206206	DAXX	B	-1.62962	-1.62962	1.45643	-0.233854	-1.21913	2.41218	-0.811895	-0.782404	2.43791
ENSG00000039560	RAI14	B	-1.99817	-2.45032	-0.311291	-0.0899936	0.795762	2.76522	-0.761591	0.341638	1.70874
ENSG00000135919	SERPINE2	B	-1.36858	-2.4003	-0.407275	1.56502	-1.78602	2.18801	1.64749	-0.386873	0.948529
ENSG00000062524	LTK	B	-1.13189	-1.08753	-1.05555	3.00044	-0.525784	-0.408034	2.77215	-0.949501	-0.614301
ENSG00000101049	SGK2	B	-2.0602	-2.27017	2.4611	1.20592	0.26455	1.40889	-0.497751	-1.40529	0.892948
ENSG00000139880	CDH24	B	-2.43331	-2.6372	-1.3331	1.13304	1.03519	1.48059	0.838575	0.611052	1.30516
ENSG00000225551		B	-0.77722	-0.77722	-0.77722	-0.77722	-0.77722	3.93407	1.50647	-0.77722	-0.77722
ENSG00000130511	SSBP4	B	-2.02475	-3.10806	-1.04292	1.2207	0.759454	1.45272	0.922554	0.441778	1.37853
ENSG00000166886	NAB2	B	-2.48633	-2.95843	-0.569159	1.0109	0.946071	1.71405	0.688036	0.882946	0.77192
ENSG00000221829	FANCG ENSG00000221829	B	-1.83639	-2.92362	-1.63989	1.39184	0.969069	1.4738	0.947809	0.597913	1.01946
ENSG00000106003	LFNG	B	-2.06918	-1.76234	0.881145	2.61311	-1.18497	0.395204	1.91304	-1.23421	0.448202
ENSG00000151474	FRMD4A	B	-2.75383	-2.85828	0.705349	0.606856	1.46196	1.49593	-0.0269186	0.67927	0.68967
ENSG00000145934	TENM2	B	-1.451	-1.57794	-1.43881	2.79254	-0.491693	0.288887	1.91812	-1.33445	1.29434
ENSG00000146090	RASGEF1C	B	-1.48037	-1.48037	-1.39416	1.98034	-1.48037	1.57018	2.01746	-1.07194	1.33922
ENSG00000197555	SIPA1L1	B	-2.96821	-2.71818	0.498808	1.23985	0.650259	1.49293	0.488307	0.366633	0.949604
ENSG00000169302	STK32A	B	-1.28221	-1.72624	-0.188631	2.8255	1.54213	-1.55757	1.48941	0.351461	-1.45386
ENSG00000105464	GRIN2D	B	-2.25916	-2.28638	-1.64831	1.77442	0.427882	1.71854	1.40025	0.104485	0.768269
ENSG00000134871	COL4A2	B	-2.43844	-2.90746	1.33774	0.141978	1.7028	1.07295	0.441243	1.10847	-0.459269
ENSG00000197183	NOL4L	B	-2.5477	-2.72091	-0.940915	0.912845	1.55424	1.21678	0.430765	1.0553	1.0396
ENSG00000109103	UNC119	B	-2.46794	-3.07513	-0.303059	1.0396	0.807305	1.4144	0.810783	0.516505	1.25754
ENSG00000278763	FAM27B	B	-3.18796	-1.71755	-0.238228	1.97188	-0.159199	1.70269	1.14658	-0.23973	0.721513
ENSG00000204624	DISP3	B	-2.14282	-2.14282	-2.10768	1.95218	1.24485	1.18185	0.859267	0.754518	0.400664
ENSG00000121966	CXCR4	B	-2.55279	-2.77684	-0.509186	0.884453	0.874959	2.0415	0.910994	0.270717	0.856194
ENSG00000101856	PGRMC1	B	-2.81312	-2.91577	1.15179	1.18353	0.265255	1.04482	0.807033	0.50557	0.770892
ENSG00000169064	ZBBX	B	-1.76507	-1.76507	-1.76507	2.17755	0.293922	1.98645	1.64685	-0.969171	0.159593
ENSG00000285174	NA	B	-2.44805	-2.46609	-1.55657	1.52177	1.11684	0.863868	0.818847	1.01941	1.12998
ENSG00000183741	CBX6	B	-2.40183	-2.77227	-0.658786	1.73748	0.167086	1.29364	1.33261	0.132115	1.16995
ENSG00000161681	SHANK1	B	-2.02136	-2.30717	-2.00683	2.08651	0.585378	0.889329	1.17095	0.495172	1.10803
ENSG00000162694	EXTL2	B	-2.0314	-3.11016	-0.983714	1.32479	0.875882	1.55637	0.870283	0.456104	1.04185
ENSG00000113758	DBN1	B	-2.46904	-2.89219	-0.835833	1.14378	1.12095	1.12588	0.679993	1.18203	0.94443
ENSG00000166923	GREM1	B	-1.54555	-1.45788	-0.721722	-1.02764	1.13904	2.93815	-1.20328	-0.180521	2.05939
ENSG00000204371	EHMT2	B	-2.16527	-2.81182	-1.2675	1.31847	1.44741	0.53702	0.530585	1.54084	0.870259
ENSG00000103855	CD276	B	-2.28823	-3.20524	0.774278	0.580248	1.3032	1.33169	-0.286978	0.655822	1.13521
ENSG00000161921	CXCL16	B	-1.88569	-1.83193	2.03177	1.76874	-0.644264	0.617734	0.75961	-2.11721	1.30124
ENSG00000151067	CACNA1C	B	-2.19663	-2.34835	-1.69908	1.48449	1.51481	1.48376	0.827937	-0.0965804	1.02964
ENSG00000169583	CLIC3	B	-1.46508	-1.57403	-0.38653	2.55053	-0.785484	-0.185956	1.63055	-1.77052	1.98652
ENSG00000173852	DPY19L1	B	-1.73901	-2.96472	-0.918163	-0.10026	2.03311	1.71421	0.362515	1.30467	0.307649
ENSG00000176845	METRNL	B	-2.37749	-2.48467	1.43592	2.09754	-0.139367	0.794381	1.53117	-0.373925	-0.483565
ENSG00000274973	BSNDP2	B	-0.938949	-1.07669	-1.66751	2.05431	2.9735	-0.682883	0.452492	0.553243	-1.66751
ENSG00000165533	TTC8 ENSG00000165533	B	-2.34025	-3.11573	-0.263649	1.32017	0.918773	1.56568	0.646269	0.383444	0.8853
ENSG00000249230	CDH12P2	B	-2.78423	-2.78423	0.972886	1.49784	0.598389	1.49448	0.414777	0.265236	0.324862
ENSG00000109832	DDX25	B	-1.80538	-1.80921	-1.56255	2.73287	-0.12794	0.734341	2.10468	-0.415999	0.14919
ENSG00000243943	ZNF512	B	-2.58084	-2.74445	-0.709668	1.25891	1.03113	1.62733	0.847528	0.410363	0.859703
ENSG00000112796	ENPP5	B	0.60501	-1.82784	-0.67403	2.64115	-2.17448	0.475386	1.80723	-1.39969	0.547264
ENSG00000181291	TMEM132E	B	-1.83975	-1.90278	-1.81963	1.33463	2.56765	0.641877	1.46841	0.113015	-0.563442
ENSG00000123374	CDK2	B	-2.16649	-3.20638	-0.640828	1.14248	0.680566	0.998685	1.01863	0.997064	1.17627
ENSG00000126970	ZC4H2	B	-2.5637	-2.79206	-0.717245	1.29494	1.23197	1.08842	1.14753	0.898855	0.411293
ENSG00000109452	INPP4B	B	-0.497477	-1.00094	-1.35894	2.72339	-1.25297	0.781461	2.38381	-1.78232	0.00400411
ENSG00000120742	SERP1	B	-2.08864	-3.47629	0.319927	1.26494	0.782258	0.919328	1.13334	0.524499	0.620647
ENSG00000167100	SAMD14	B	-1.45583	-2.63721	-2.13867	1.14134	0.733724	1.73151	0.606665	0.436129	1.58235
ENSG00000142156	COL6A1	B	-2.13612	-2.68771	0.800776	1.3615	-0.718653	1.49249	0.780562	-0.729697	1.83685
ENSG00000101888	NXT2	B	-2.50526	-3.01833	-0.101536	1.61571	0.932345	0.948508	1.04542	0.73799	0.345148
ENSG00000174586	ZNF497 ENSG00000174586	B	-2.12846	-2.4699	-1.83284	1.6048	1.15764	1.25321	0.921071	0.534577	0.959903
ENSG00000134853	PDGFRA	B	-2.6199	-2.65207	-0.2919	1.95097	0.866993	1.31907	1.08976	0.121707	0.215372
ENSG00000149927	DOC2A	B	-1.69921	-2.54604	-2.21285	1.11981	0.882473	1.18183	0.899605	0.871573	1.50281
ENSG00000198440	ZNF583	B	-3.24518	-1.8383	0.268696	2.28269	0.920815	0.687133	0.988765	0.0845776	-0.149192
ENSG00000180198	RCC1 ENSG00000180198	B	-2.14289	-2.94455	-1.03137	0.560327	1.05434	1.31496	0.413785	1.39152	1.38387
ENSG00000136108	CKAP2	B	-2.47632	-2.80352	-0.670056	1.44615	0.344457	1.43971	1.00564	0.471898	1.24204
ENSG00000168140	VASN	B	-2.46098	-2.75361	0.623524	1.8838	0.189899	0.844267	1.64209	-0.471775	0.50278
ENSG00000138443	ABI2	B	-1.65303	-3.29372	-0.711993	1.51691	0.877285	1.78211	0.168392	0.289297	1.02474
ENSG00000226437	TRIM39	B	0.36828	-2.14511	1.16741	1.31131	-2.14511	1.42155	1.3129	-2.14511	0.853875
ENSG00000143924	EML4	B	-2.34622	-3.01078	0.317079	0.749508	0.670339	2.06514	0.236704	0.102617	1.21561
ENSG00000151725	CENPU	B	-2.10545	-2.77345	-1.48796	1.58241	0.962521	0.839692	1.14359	0.939432	0.899209
ENSG00000012660	ELOVL5	B	-2.51659	-2.46203	2.69796	0.398704	0.286773	1.14591	-0.129807	0.115512	0.463575
ENSG00000099256	PRTFDC1	B	-2.64087	-2.63039	-0.829539	0.650687	1.53933	1.27852	0.679268	1.19144	0.761554
ENSG00000171940	ZNF217	B	-2.25515	-2.55801	0.259853	0.449716	2.55503	0.731696	-0.945641	1.02312	0.739385
ENSG00000184465	WDR27	B	-1.76745	-3.15303	0.198556	0.645327	1.59823	1.87273	-0.827437	0.448887	0.984186
ENSG00000146215	CRIP3	B	-2.30047	-2.51817	-1.61295	1.12463	1.12515	0.787875	1.21818	0.800262	1.37548
ENSG00000145284	SCD5	B	-2.49855	-2.48801	-1.21556	1.23869	0.682154	1.65438	0.986104	0.354975	1.28582
ENSG00000188878	FBF1	B	-1.8145	-2.70419	-0.947094	1.73652	-0.0529339	1.89927	0.972509	-0.521149	1.43158
ENSG00000166598	HSP90B1	B	-2.69686	-3.03215	0.47457	0.828074	0.991451	0.910555	0.748474	1.06085	0.715041
ENSG00000060656	PTPRU	B	-1.26653	-3.12452	-0.663097	2.09703	1.91753	0.778148	0.804728	-0.498158	-0.0451311
ENSG00000188064	WNT7B	B	-2.11549	-2.11549	-1.49698	2.15098	0.392809	0.210233	2.09305	-0.105202	0.986074
ENSG00000231321	RXRB	B	1.0554	-1.51624	-1.52713	2.86618	-0.539801	-0.514443	2.15543	-0.630891	-1.3485
ENSG00000155254	MARVELD1	B	-2.81993	-2.66695	-0.279869	1.29438	0.81858	1.23797	1.10518	0.306787	1.00386
ENSG00000213420	GPC2	B	-2.26321	-2.101	-2.10351	1.15117	0.89345	1.37681	0.707683	0.946764	1.39182
ENSG00000103202	NME4	B	-1.54279	-3.30883	0.717264	-0.152226	1.0209	1.42607	-0.800872	0.982535	1.65794
ENSG00000251050	RBX1P2	B	-0.820846	-2.3777	-2.3777	2.45547	1.05558	0.0488679	1.13901	0.930921	-0.0536098
ENSG00000176463	SLCO3A1	B	-2.61398	-2.88864	-0.292068	1.14495	1.07868	1.13126	0.388389	1.12902	0.922385
ENSG00000230777	RPS29P5	B	-1.66212	-1.66212	-1.66212	0.864483	0.713354	1.9273	1.16472	-1.66212	1.97863
ENSG00000231859		B	-1.96018	-3.03869	-0.939492	1.45925	1.62096	1.1076	1.01944	0.233783	0.497329
ENSG00000197568	HHLA3	B	-2.28966	-2.53644	-0.648181	2.15968	0.0289278	1.06932	1.66532	-0.186297	0.737338
ENSG00000265693		B	-1.64705	-1.64705	-1.64705	2.37577	0.964179	1.22037	0.641509	1.38635	-1.64705
ENSG00000244050	DEFB109F	B	-1.89377	-2.80109	-1.53837	0.870926	1.75546	1.22247	0.447839	0.842801	1.09374
ENSG00000139364	TMEM132B	B	-1.62702	-1.61495	-1.45329	0.594467	-0.0421615	3.15171	0.38186	-0.9678	1.57718
ENSG00000258102	MAP1LC3B2 ENSG00000258102	B	-2.01243	-2.06884	-1.63135	2.10815	0.806892	2.22621	0.299938	-0.00675869	0.278199
ENSG00000111786	SRSF9	B	-2.26068	-3.25223	-0.170573	1.13762	1.00047	1.02302	0.736459	0.961068	0.824852
ENSG00000158769	F11R ENSG00000158769	B	-1.40949	-1.72546	1.8457	1.85758	-1.17552	0.256478	1.765	-2.08517	0.670887
ENSG00000162188	GNG3	B	-1.40633	-1.59834	-1.34045	3.03081	-0.347014	0.0953822	2.28535	-0.519353	-0.20006
ENSG00000130702	LAMA5	B	-2.35795	-2.49057	-1.45566	1.21979	1.68544	0.78913	0.658885	1.00314	0.947793
ENSG00000112981	NME5	B	-2.42019	-2.34711	-1.32373	1.43995	1.6776	1.51694	0.183309	0.661579	0.611648
ENSG00000182310	SPACA6 ENSG00000182310	B	-2.01769	-2.57131	-1.35997	1.98425	0.959232	1.09284	1.52571	-0.0928142	0.479758
ENSG00000277647		B	-0.661567	-0.661567	-0.661567	4.23226	-0.661567	-0.661567	-0.661567	0.398709	-0.661567
ENSG00000176945	MUC20	B	-1.24029	-3.48142	-0.927795	1.1239	0.648497	1.25252	1.56537	0.112227	0.946989
ENSG00000226882	GNL1	B	-1.90532	-3.27503	-0.397886	1.66594	0.633339	1.31817	1.08869	0.185111	0.686987
ENSG00000113645	WWC1	B	-2.25538	-2.56557	-0.344624	2.23401	0.277377	-0.213784	1.93876	0.555589	0.373619
ENSG00000166341	DCHS1	B	-2.277	-2.75828	-0.901233	0.349944	1.19861	1.79555	0.313672	1.02814	1.2506
ENSG00000105642	KCNN1	B	-2.14234	-2.18127	-2.03205	0.866957	0.429221	1.47172	0.967462	1.03509	1.58521
ENSG00000072041	SLC6A15	B	-1.38951	-1.20284	-0.343394	0.657604	-1.47371	2.8844	-0.12217	-1.26083	2.25045
ENSG00000253910	PCDHGB2	B	-1.48254	-1.75166	-1.12326	2.91648	-0.307012	0.140138	2.15571	0.480758	-1.02861
ENSG00000259978	MRPS21P8	B	-0.288336	-2.68082	-2.68082	1.26265	0.637347	0.35955	1.01166	1.75606	0.622716
ENSG00000100156	SLC16A8 ENSG00000100156	B	-2.27335	-1.92956	-1.84771	2.1661	1.00702	0.988426	1.40068	0.199761	0.288641
ENSG00000103241	FOXF1	B	-1.60444	-1.58136	-1.3965	2.31016	1.41109	-0.565864	1.63633	1.25499	-1.4644
ENSG00000119866	BCL11A	B	-2.40953	-2.41797	-0.935209	0.842595	1.28404	1.4378	-0.556521	1.3579	1.39689
ENSG00000006047	YBX2	B	-2.06328	-2.8955	-0.586136	1.66821	0.372496	1.59661	1.25283	-0.308192	0.962971
ENSG00000129946	SHC2	B	-2.08615	-2.2366	-1.54819	1.08694	1.99254	1.41732	-0.202632	1.42269	0.154076
ENSG00000213809	KLRK1	B	-1.65022	-1.27742	0.758757	-0.621561	-0.652424	3.30234	-1.31283	-0.160098	1.61346
ENSG00000183048	SLC25A10	B	-1.86174	-2.76814	0.819272	2.08121	-0.811898	0.357681	1.77165	-0.440622	0.852592
ENSG00000130066	SAT1	B	-1.33215	-2.50662	1.05715	3.10087	-0.677787	0.257528	0.996515	-0.812889	-0.082613
ENSG00000227500	SCAMP4 ENSG00000227500	B	-1.80734	-3.37266	-0.481729	1.25904	0.823751	1.34234	0.695734	0.34808	1.19278
ENSG00000145860	RNF145	B	-2.17181	-3.16504	-0.322639	1.37472	1.37936	1.01838	0.705842	0.809515	0.371662
ENSG00000177103	DSCAML1	B	-1.68391	-1.91744	-1.55927	2.47726	0.435751	0.371513	2.30497	-0.475349	0.046477
ENSG00000161509	GRIN2C	B	-1.80026	-1.77924	-1.33734	2.415	0.701642	0.152505	2.22955	-1.08531	0.503441
ENSG00000273444		B	0.144085	-2.48484	0.220468	2.22423	0.802066	-2.48484	-0.417581	0.379389	1.61703
ENSG00000158747	NBL1	B	-2.28823	-1.93021	0.577449	2.1473	0.774669	-1.44546	2.03668	0.364573	-0.236769
ENSG00000281775	FTCD	B	-2.82062	-2.05747	-0.993731	0.761989	1.58059	0.851652	0.929766	-0.00701452	1.75484
ENSG00000278644	PCGF2	B	-2.35061	-2.79019	-0.963673	1.12913	1.20547	1.41584	0.586683	0.733656	1.03369
ENSG00000196123	KIAA0895L	B	-2.39406	-2.79487	-0.666873	1.5361	0.942285	1.46745	0.79757	0.193587	0.918811
ENSG00000158292	GPR153	B	-2.39278	-2.31176	0.747742	2.24156	0.186868	-0.310214	1.93942	0.365251	-0.466092
ENSG00000104044	OCA2 ENSG00000104044	B	-2.12009	-2.10332	-1.97991	0.409957	0.870516	1.96752	0.633166	0.879268	1.44289
ENSG00000128536	CDHR3	B	-2.70897	-2.60721	-0.189656	0.695883	1.66362	1.50135	0.153702	0.550876	0.940404
ENSG00000170323	FABP4	C	2.3147	2.0851	9.67407	-3.00248	-2.05264	0.21599	-3.51787	-3.63924	-2.07762
ENSG00000123689	G0S2	C	4.31787	2.54467	8.02419	-2.50175	-1.84394	-2.93743	-2.27067	-2.68645	-2.64649
ENSG00000173432	SAA1	C	-1.59886	0.898031	10.0135	-1.59886	-1.59886	-1.59886	-1.59886	-1.31836	-1.59886
ENSG00000167588	GPD1	C	4.66058	1.19577	7.19124	-2.53129	-2.2836	-2.06288	-1.47659	-2.1153	-2.57793
ENSG00000196616	ADH1B	C	2.45741	0.688753	8.24773	-1.8576	-1.43503	-1.977	-2.07619	-2.08578	-1.96229
ENSG00000189058	APOD	C	3.14356	2.07998	5.84289	1.65271	-1.51127	-0.400857	-3.11844	-3.73214	-3.95644
ENSG00000167676	PLIN4	C	3.49804	0.932904	7.40868	-1.59611	-1.94304	-2.57104	-1.42168	-1.90534	-2.40241
ENSG00000197766	CFD	C	2.32745	2.8346	6.78505	-1.35794	-2.14926	-1.73709	-2.08724	-2.53363	-2.08194
ENSG00000135218	CD36	C	3.13302	1.18417	6.61666	-2.66445	-2.20211	-1.48882	0.0499177	-1.30581	-3.32259
ENSG00000166819	PLIN1	C	-0.414961	-1.19984	8.42256	-1.14791	-0.877686	-1.38976	-0.768321	-1.30468	-1.3194
ENSG00000138207	RBP4	C	-2.0516	-3.1624	7.61107	1.12604	-1.89338	-0.677907	0.476949	-1.4491	0.0203265
ENSG00000187288	CIDEC	C	-0.607723	-1.04624	8.34978	-1.17197	-1.17197	-1.17197	-1.08162	-0.926326	-1.17197
ENSG00000181092	ADIPOQ	C	-0.368361	-1.21817	8.12843	-1.0577	-1.2765	-1.0432	-1.21162	-0.756312	-1.19657
ENSG00000188257	PLA2G2A	C	-0.688128	1.07751	7.75633	-1.20798	-1.44057	-1.44057	-1.44057	-1.44057	-1.17546
ENSG00000174697	LEP	C	-1.05722	-1.00208	8.0388	-1.04741	-1.06199	-0.963354	-0.886199	-1.01787	-1.00268
ENSG00000130203	APOE	C	-1.45899	-3.48868	4.32246	2.3833	-3.16928	1.36141	1.96476	-3.8215	1.90652
ENSG00000011465	DCN	C	2.52366	2.95496	5.11002	0.872192	-2.07397	-2.02438	-1.80581	-3.91299	-1.64368
ENSG00000165269	AQP7	C	3.41899	1.56264	6.01413	-2.10861	-1.433	-1.20615	-2.50958	-1.84769	-1.89072
ENSG00000118785	SPP1	C	-1.43067	-2.83183	6.57819	-1.00157	-0.419197	1.5796	-2.6884	-1.79921	2.01309
ENSG00000129538	RNASE1	C	1.78067	1.60883	4.38373	0.821631	0.880411	1.70953	-3.41398	-3.96051	-3.81032
ENSG00000204525	HLA-C	C	-1.52019	-2.37097	5.06241	-0.826216	-2.37097	3.57201	-1.65602	-2.37097	2.48093
ENSG00000143196	DPT	C	1.05196	2.72625	5.80812	-2.79964	-2.08197	-2.60148	0.0454743	0.11057	-2.25929
ENSG00000173267	SNCG	C	-0.338428	0.722962	6.38801	1.41341	-1.74985	-1.31973	0.744683	-2.67342	-3.18764
ENSG00000176485	PLAAT3	C	2.75451	1.86935	5.9381	-1.58901	-1.30602	-1.26718	-2.18686	-2.18616	-2.02673
ENSG00000151365	THRSP	C	2.04266	-0.176676	6.95983	-1.65643	-1.42936	-1.50536	-1.47657	-1.56648	-1.19162
ENSG00000166741	NNMT	C	2.62135	3.18496	4.49264	-0.0273188	-1.75373	-1.83015	-3.23653	-3.09343	-0.357796
ENSG00000145824	CXCL14	C	0.0245145	-1.21424	3.34651	3.78053	-3.08862	-4.32191	2.78197	-0.608044	-0.700709
ENSG00000111341	MGP	C	0.869842	2.2474	4.10583	0.43599	-0.0554003	0.306596	-4.09779	-4.65268	0.840207
ENSG00000099194	SCD	C	-1.94186	-3.47356	6.68933	-0.12833	-0.452182	-0.53799	-0.85085	0.419541	0.275915
ENSG00000139329	LUM	C	2.0291	1.83947	5.13509	0.818164	-0.433918	-1.71269	-2.58699	-3.77299	-1.31523
ENSG00000211445	GPX3	C	2.26996	1.19873	5.15739	-2.78616	-2.95047	-2.69543	0.137789	0.884527	-1.21634
ENSG00000198848	CES1	C	-1.62834	-0.789293	7.00941	-1.10165	-1.17278	-1.45629	-0.710231	-0.644813	0.493996
ENSG00000189221	MAOA	C	3.17095	1.52271	5.27649	-1.99911	-1.89024	-2.0043	-1.22227	-1.60367	-1.25058
ENSG00000176194	CIDEA	C	-0.904224	-1.11241	7.05425	-0.0369255	-0.891353	-1.02005	-1.11241	-0.864462	-1.11241
ENSG00000130303	BST2	C	-0.22777	-0.223698	2.62094	3.64856	-1.5258	-1.13805	3.38846	-3.13864	-3.40401
ENSG00000234745	HLA-B	C	0.189662	-4.27707	3.25654	2.3177	-3.63163	1.79922	1.71701	-1.06033	-0.311111
ENSG00000102265	TIMP1	C	-0.622665	-0.223819	2.81003	1.07935	-1.03528	2.65096	-3.15662	-4.36626	2.86431
ENSG00000211592	IGKC	C	-1.43402	-0.0116192	4.492	-1.09027	3.38681	1.58663	-2.39843	-2.13268	-2.39843
ENSG00000134339	SAA2	C	-1.74697	-0.402139	6.69173	-0.489685	-1.2459	-1.33984	0.02786	-1.09331	-0.401737
ENSG00000198759	EGFL6	C	-1.71271	-1.66459	6.38419	-1.49933	-0.816319	1.33828	-0.529466	-1.09405	-0.406005
ENSG00000008394	MGST1	C	-1.42905	-0.980668	6.70275	0.157226	-1.11741	-1.43623	-0.77394	-0.277547	-0.845131
ENSG00000011600	TYROBP ENSG00000011600	C	-0.201786	0.110645	5.56598	0.391924	0.700212	1.02481	-2.84887	-2.84887	-1.89405
ENSG00000172137	CALB2	C	-2.16999	-2.17969	4.88354	-1.33066	-1.9683	1.24478	1.64611	-2.18808	2.06229
ENSG00000175445	LPL	C	2.54854	-0.0170591	5.38733	-0.989124	-2.80826	-2.15267	0.0353817	-0.530025	-1.47412
ENSG00000157150	TIMP4	C	0.913494	0.398615	6.29052	-1.45285	-1.2688	-1.56424	-0.753978	-1.13837	-1.42439
ENSG00000136235	GPNMB	C	1.31707	1.00082	5.56198	-0.471079	-1.80509	0.468838	-2.0373	-2.66473	-1.37052
ENSG00000277236	CCL14	C	-0.248158	2.42426	4.13732	1.43281	0.511027	0.372725	-2.62213	-3.00393	-3.00393
ENSG00000130300	PLVAP	C	-1.3807	0.308514	3.55676	2.87178	1.17674	1.71065	-2.13824	-3.03183	-3.07368
ENSG00000111348	ARHGDIB	C	0.468725	0.796171	3.45716	1.70034	1.08148	1.75042	-3.24084	-3.32326	-2.69019
ENSG00000131471	AOC3	C	-0.138987	0.603839	5.74607	0.655186	-1.54862	0.562349	-1.40656	-1.93526	-2.53802
ENSG00000160307	S100B	C	-0.965879	-0.733753	6.49459	-0.611413	-1.17041	-0.507598	-0.445296	-1.36395	-0.696292
ENSG00000005249	PRKAR2B	C	-2.53171	-2.79137	4.91843	1.21906	-1.67734	0.864353	0.671903	-1.66267	0.989344
ENSG00000056998	GYG2	C	-1.74282	-1.7451	5.94869	-1.08031	-0.975113	0.702058	-1.17456	-0.897212	0.964368
ENSG00000234794	HLA-DRA	C	-0.240442	0.571606	4.27894	1.41823	0.86137	0.74453	-0.584176	-3.52503	-3.52503
ENSG00000173372	C1QA	C	0.473769	0.836696	4.86311	0.272241	0.421215	1.0866	-2.57389	-2.68987	-2.68987
ENSG00000151632	AKR1C2	C	2.17131	0.538607	5.34305	-0.612644	-0.519698	-1.42421	-2.04607	-1.33145	-2.1189
ENSG00000079435	LIPE	C	-0.273801	-1.79855	6.15692	-0.0563651	-1.41246	-1.24342	0.215393	-0.638069	-0.949646
ENSG00000110799	VWF ENSG00000110799	C	1.01848	0.90874	3.18728	0.0043321	1.29011	2.42393	-2.55376	-2.89869	-3.38042
ENSG00000148671	ADIRF	C	-0.892403	0.64535	5.55234	0.85811	-0.466571	-1.67657	0.207124	-2.80898	-1.4184
ENSG00000151726	ACSL1	C	3.33064	0.853639	4.3047	-0.284353	-1.20887	-2.30039	-0.905753	-1.70377	-2.08585
ENSG00000169442	CD52	C	-0.000527254	0.799066	5.7455	-1.89855	-0.494568	0.11335	-1.89855	-1.89855	-0.467173
ENSG00000099260	PALMD	C	2.83857	1.19824	3.95288	0.178501	-1.69417	-0.872067	0.033018	-2.78191	-2.85307
ENSG00000124253	PCK1	C	-0.656523	-0.969948	6.27369	-0.573559	-0.912248	-0.92397	-0.557469	-0.710157	-0.969814
ENSG00000271974	RDM1P4	C	-0.16209	-2.86442	2.68115	1.32218	-2.86442	2.80242	0.23418	-2.86442	1.71542
ENSG00000148053	NTRK2	C	-1.56243	-1.4301	3.09305	0.30296	-2.46465	3.61443	-0.985487	-2.48395	1.91619
ENSG00000196154	S100A4	C	0.444982	1.52666	4.5921	0.338593	-2.93152	-2.13961	1.38297	-1.42498	-1.78919
ENSG00000094963	FMO2	C	1.88493	0.79309	5.29236	-1.26816	-1.57232	-1.5632	-1.57922	-1.60421	-0.383266
ENSG00000062282	DGAT2	C	-1.21104	-2.71631	5.6363	-1.35598	-0.0853225	0.615474	-0.909379	0.229004	-0.202745
ENSG00000159189	C1QC	C	-0.0633484	0.171116	4.7155	0.236965	0.6176	1.67007	-2.4196	-2.41491	-2.51338
ENSG00000106538	RARRES2	C	-1.40192	-1.33039	4.9719	0.984008	-2.0125	0.710208	-0.439764	-2.76489	1.28335
ENSG00000230953		C	1.32081	-2.99982	1.96381	2.20756	0.698833	2.24535	-2.99982	-2.99982	0.563095
ENSG00000095637	SORBS1	C	2.6779	0.948203	4.65588	-1.05711	-1.81577	-0.411738	-1.74718	-2.02483	-1.22536
ENSG00000163431	LMOD1	C	3.24299	2.07021	3.63149	-1.22702	-1.65547	-1.1963	-1.42854	-2.00033	-1.43703
ENSG00000173369	C1QB	C	0.081103	0.407938	4.53241	0.375836	0.736027	1.30646	-2.47992	-2.47992	-2.47992
ENSG00000189129	PLAC9	C	0.799861	1.56892	4.89961	-0.896132	-0.769085	-0.97307	-1.30383	-3.14082	-0.185461
ENSG00000184601	C14orf180	C	2.65502	-0.1515	4.9483	-0.942377	-1.34425	-1.34425	-1.24545	-1.34425	-1.23125
ENSG00000010319	SEMA3G	C	-0.577767	0.059198	5.36882	0.611406	-1.1709	-1.19008	0.670902	-1.89624	-1.87535
ENSG00000184811	TRARG1	C	-0.651318	-0.799037	5.94107	-0.799037	-0.799037	-0.799037	-0.644901	-0.649665	-0.799037
ENSG00000164530	PI16	C	2.51775	1.4657	4.24471	-2.07788	-1.75074	-1.64131	-0.54096	-0.724036	-1.49323
ENSG00000163815	CLEC3B	C	1.0943	1.1811	4.91178	-0.077014	-1.37277	-2.43141	-0.662628	-0.601949	-2.04141
ENSG00000137965	IFI44	C	-0.746739	-1.16467	1.80153	3.31965	-0.276478	0.150434	2.53973	-3.44531	-2.17814
ENSG00000280938	TRARG1	C	-0.570678	-0.514922	5.90002	-0.819086	-0.819086	-0.760232	-0.819086	-0.819086	-0.777841
ENSG00000009950	MLXIPL	C	2.23541	0.593107	3.6016	1.09309	-2.65862	-2.04657	1.0122	-2.13953	-1.69068
ENSG00000227357	HLA-DRB4	C	1.09896	0.681503	3.7817	1.21489	0.535557	0.420897	-1.64322	-3.04514	-3.04514
ENSG00000165092	ALDH1A1	C	2.36642	0.865947	4.04735	-2.41363	-1.99694	-1.9643	-1.55336	0.489144	0.15936
ENSG00000213088	ACKR1	C	-0.205295	2.21806	5.04837	-1.24328	-0.844729	-1.24328	-1.24328	-1.24328	-1.24328
ENSG00000236884	HLA-DRB1	C	0.780613	-1.68408	4.54186	1.06903	-1.6868	1.66963	-1.31651	-1.68925	-1.68449
ENSG00000069535	MAOB	C	3.40259	0.963582	3.77369	-1.59399	-0.97474	-1.33217	-1.5849	-1.23013	-1.42393
ENSG00000100985	MMP9	C	-1.37011	-1.60752	4.66488	-0.119692	-0.686609	2.6491	-1.49369	-1.13587	-0.900498
ENSG00000167779	IGFBP6	C	-0.178001	0.825495	2.91461	1.20051	-3.50975	0.490819	0.607388	-3.58472	1.23366
ENSG00000228987	HLA-DRA	C	-1.00358	-1.00358	5.24073	-1.00358	-1.00358	1.78434	-1.00358	-1.00358	-1.00358
ENSG00000236236	TNXB	C	-1.04052	2.9013	3.63912	-2.46691	-0.0210623	-1.04925	-2.46691	1.07916	-0.574921
ENSG00000225480		C	-2.4056	-2.4056	3.49933	0.572219	1.93993	1.84327	-0.369829	-2.4056	-0.26814
ENSG00000107438	PDLIM1	C	3.08762	1.49702	2.5134	-0.0572988	-1.44225	-0.130668	-1.20062	-3.94009	-0.327119
ENSG00000115380	EFEMP1	C	-0.572781	0.736783	4.71419	-1.4153	-2.62059	-1.45725	-0.141128	-0.758466	1.51454
ENSG00000086289	EPDR1	C	3.23575	1.35612	2.6819	0.58367	-1.8599	-2.18538	0.23267	-1.66967	-2.37516
ENSG00000216490	IFI30 ENSG00000216490	C	-2.20381	-1.36887	4.9698	0.819337	-0.414493	0.593612	-0.163371	-1.91784	-0.31436
ENSG00000215845	TSTD1	C	0.130451	-1.47195	1.38456	2.5302	-2.47573	0.518526	2.11758	-3.73368	1.00004
ENSG00000090382	LYZ	C	-0.427586	0.381581	5.25188	-0.714515	0.0718718	0.257806	-1.76949	-1.57208	-1.47947
ENSG00000187134	AKR1C1	C	1.5771	0.0572129	4.8364	-0.135842	-0.827513	-0.80988	-0.557322	-1.90478	-2.23537
ENSG00000230763	HLA-DPB1	C	-1.06916	-1.35947	4.87803	0.0826257	-1.35947	1.94283	-1.35947	-0.768539	-0.987357
ENSG00000064205	CCN5	C	1.19405	1.28626	3.76998	-1.93553	-2.62219	-1.9188	-0.247323	1.6423	-1.16875
ENSG00000133063	CHIT1	C	-1.1568	-1.20567	5.49527	-0.713307	-0.89413	-0.400777	0.126891	-0.645259	-0.60621
ENSG00000119927	GPAM	C	-0.462554	-2.31991	5.22367	0.177194	-0.444812	0.137817	-0.606831	-1.10239	-0.602183
ENSG00000263155	MYZAP	C	-0.187067	-1.34359	4.47147	-1.60142	1.45371	-0.560188	-2.04786	1.29469	-1.47974
ENSG00000185432	METTL7A	C	2.21481	0.772397	3.59232	0.977953	-1.80133	-2.18522	-0.653753	-2.64381	-0.273371
ENSG00000229353	TNXB	C	2.57848	-1.57962	4.02404	-0.314408	-1.57962	-1.44484	0.975816	-1.57962	-1.08023
ENSG00000170262	MRAP	C	-0.830466	-0.830466	5.49069	-0.602029	-0.674981	-0.431788	-0.578842	-0.711653	-0.830466
ENSG00000232126	HLA-B	C	-1.33375	-0.361147	3.46238	0.977826	0.409013	1.65998	-0.0857	-3.94757	-0.781026
ENSG00000161649	CD300LG	C	1.95644	0.54148	4.59732	-1.19225	-1.08666	-1.2088	-1.11376	-1.30981	-1.18397
ENSG00000138615	CILP	C	0.602449	1.20332	2.46313	-2.99428	1.68543	-2.89884	-0.227195	1.68693	-1.52093
ENSG00000162645	GBP2	C	2.13606	2.062	3.57059	-0.815145	-0.870804	-0.825148	-1.69741	-2.18658	-1.37357
ENSG00000103512	NOMO1	C	-1.76767	-1.5807	2.32412	-1.76767	-0.772141	2.9669	-1.47083	-0.599049	2.66704
ENSG00000186205	MTARC1	C	0.693361	-0.877883	5.21175	-0.948043	-0.551266	-0.795594	-1.30161	-0.572133	-0.858584
ENSG00000175899	A2M	C	0.90816	0.498211	2.93885	0.788182	0.716818	1.7161	-2.42111	-2.33074	-2.81447
ENSG00000165810	BTNL9 ENSG00000165810	C	1.13654	0.749269	3.38155	-0.307359	1.2307	-0.677993	-2.94855	0.388947	-2.9531
ENSG00000163565	IFI16	C	-0.626115	-0.485893	2.86898	2.39517	0.351223	-0.46942	1.46208	-3.3245	-2.17152
ENSG00000144908	ALDH1L1	C	3.53377	0.00599537	3.16606	-1.62968	0.0857275	-1.56438	-1.46759	-0.438541	-1.69136
ENSG00000249751	ECSCR	C	0.664004	0.83864	2.48677	1.6006	0.716535	1.45852	-2.58836	-2.58836	-2.58836
ENSG00000123243	ITIH5	C	-0.915688	-1.52288	3.68632	2.09664	-1.6302	0.443878	0.812939	-2.78357	-0.187441
ENSG00000101938	CHRDL1	C	-1.62199	-1.70672	4.29011	-1.40369	-0.704829	1.94391	-1.15392	-0.43008	0.78722
ENSG00000133317	LGALS12	C	-0.111846	-0.69179	5.32522	-0.777867	-0.777867	-0.777867	-0.703929	-0.706189	-0.777867
ENSG00000232804	HSPA1B	C	2.52746	-1.12779	0.456135	1.45775	-2.31778	0.576462	1.08099	-3.74201	1.08879
ENSG00000118640	VAMP8	C	-0.891726	-1.62348	1.91004	2.84564	-2.13169	-1.98105	2.61349	-1.1763	0.435068
ENSG00000224103	HLA-DPA1	C	-0.564755	-1.40425	4.32583	-0.0744534	0.607012	1.73621	-1.8465	-1.76152	-1.01757
ENSG00000160862	AZGP1	C	0.255691	-0.784002	5.23232	-0.784002	-0.784002	-0.784002	-0.784002	-0.784002	-0.784002
ENSG00000132170	PPARG	C	-0.715199	-1.18355	5.09855	-1.00815	-0.655555	-0.277209	0.323449	-0.291469	-1.29087
ENSG00000000971	CFH	C	0.401408	0.441081	3.89088	1.66408	-1.97381	-0.769363	0.301425	-2.51033	-1.44537
ENSG00000226260	HLA-DRA	C	0.251959	0.0932604	3.64751	1.12043	1.1882	0.367922	-1.92634	-2.19434	-2.54859
ENSG00000120049	KCNIP2	C	-1.19638	-2.56645	4.28431	1.25576	0.256146	0.271146	0.170571	-1.28391	-1.19119
ENSG00000091513	TF	C	-1.19637	-1.88103	4.89717	-0.0494959	0.0379248	0.43149	-0.393062	-0.922402	-0.924224
ENSG00000117594	HSD11B1 ENSG00000117594	C	-0.240732	0.00766554	5.15459	-0.946803	-0.33294	-0.946803	-0.946803	-0.946803	-0.801374
ENSG00000129422	MTUS1	C	2.02628	0.24805	0.563491	-0.573055	2.93018	-1.26024	-2.82608	1.35671	-2.46534
ENSG00000196954	CASP4	C	-0.769958	-1.2065	2.14316	2.71586	-1.13716	-0.44927	2.09735	-3.28452	-0.10895
ENSG00000165949	IFI27	C	1.14309	0.813741	3.7201	-0.489436	-0.138165	0.992174	-2.05724	-2.66432	-1.31994
ENSG00000245848	CEBPA	C	-1.96699	-2.7415	3.85218	0.861739	-0.0688993	-1.34544	1.04234	0.0196826	0.346878
ENSG00000102575	ACP5	C	-1.62088	-2.30438	4.18576	0.738008	-1.16051	-1.14822	0.622121	0.863288	-0.175178
ENSG00000163220	S100A9	C	-0.492314	2.43345	3.03186	-1.62058	-1.4727	1.50256	-1.7811	-2.01572	0.414549
ENSG00000131981	LGALS3	C	0.489224	0.583453	4.72669	-1.25915	-1.72521	-0.78774	-0.233308	-0.917192	-0.876765
ENSG00000109610	SOD3	C	0.0800057	0.71034	4.6649	-0.669684	-0.019599	-0.668507	-1.71488	-1.77895	-0.603638
ENSG00000196549	MME	C	1.26778	-0.66758	4.61088	-1.65952	-1.31092	-0.537398	-0.206015	-1.15887	-0.338354
ENSG00000176435	CLEC14A	C	1.18447	0.828923	2.37391	0.93722	0.681218	1.43182	-2.43557	-2.47968	-2.5223
ENSG00000153956	CACNA2D1	C	3.10396	0.214671	2.86776	-1.41369	-2.30889	0.54263	-1.12256	-1.5993	-0.284592
ENSG00000137440	FGFBP1	C	-1.04404	-1.04404	2.32391	-0.905734	-0.764178	-0.691227	-1.04404	-1.04404	4.21338
ENSG00000138449	SLC40A1	C	2.62628	1.31973	2.80116	-0.84775	-0.267443	0.175361	-1.8	-2.63834	-1.36899
ENSG00000112936	C7	C	-0.823964	0.306988	4.34839	-0.862872	1.74152	-1.5544	-0.847905	-1.18234	-1.12542
ENSG00000236177	HLA-DPA1	C	-0.885597	-1.72446	3.4955	1.97829	0.344801	0.649842	0.29441	-1.98588	-2.16691
ENSG00000272414	FAM47E-STBD1	C	3.4709	1.13603	2.33984	-1.46311	-1.5262	0.0405832	-1.13532	-1.92418	-0.938537
ENSG00000108551	RASD1	C	0.15304	-2.26398	3.21294	2.20341	-1.44362	-1.73499	1.19799	-1.49722	0.172427
ENSG00000117525	F3	C	0.377591	0.728283	4.3953	0.819187	-1.29436	-0.760313	-1.11066	-1.58517	-1.56985
ENSG00000165507	DEPP1 ENSG00000165507	C	-0.293112	-0.610216	3.74069	1.23848	-0.833527	1.23614	0.14934	-2.61662	-2.01117
ENSG00000162618	ADGRL4	C	-0.213183	-0.170287	3.01815	1.6542	0.229608	1.8493	-1.8892	-2.37917	-2.0994
ENSG00000250722	SELENOP	C	0.741366	-0.688927	2.96289	1.98927	-1.17546	-0.92666	1.53658	-1.58912	-2.84993
ENSG00000158571	PFKFB1	C	3.56903	-0.221849	2.9806	-1.06331	-1.43134	-0.49594	-0.79878	-1.40789	-1.13052
ENSG00000171227	TMEM37	C	-0.212947	-1.06756	4.9274	-0.103121	-0.0448384	-0.501191	-1.37164	-0.731926	-0.894178
ENSG00000110077	MS4A6A	C	0.300246	0.393506	3.72386	0.277057	0.61288	0.954994	-2.42463	-1.86405	-1.97385
ENSG00000198624	CCDC69	C	2.75928	0.579946	3.49823	-0.534197	-1.57623	-1.23265	-1.17298	-1.08473	-1.23667
ENSG00000050628	PTGER3	C	-0.820717	-0.974985	4.82695	-0.868887	-1.02847	-0.753171	0.315406	0.0419509	-0.738086
ENSG00000166816	LDHD	C	2.93753	0.473264	0.920838	1.73473	-2.4019	-0.976857	0.723205	-2.73749	-0.673321
ENSG00000125810	CD93	C	0.378632	-0.272267	2.22727	1.25124	0.744568	2.3592	-2.391	-2.2659	-2.03175
ENSG00000065833	ME1	C	2.56981	0.82572	3.51504	-1.20598	-1.06541	-1.19382	-0.781235	-1.22431	-1.43982
ENSG00000226264	HLA-DMB	C	-1.09594	-0.403151	4.43989	-0.0425344	-1.09594	1.43403	-1.09594	-1.05833	-1.08207
ENSG00000261371	PECAM1	C	0.310846	0.565824	2.93737	0.50032	0.466772	1.82863	-2.06625	-1.83814	-2.70537
ENSG00000123342	MMP19	C	-0.814941	-0.825093	4.90534	-0.590822	-0.215808	-0.306891	-0.77708	-0.469096	-0.905613
ENSG00000196139	AKR1C3	C	0.804247	-0.29916	4.02625	0.988798	-0.547465	-1.14363	0.151712	-1.97217	-2.00858
ENSG00000135917	SLC19A3	C	-1.64046	-1.82859	4.5316	-0.193177	-0.120346	-0.535024	0.262386	0.162261	-0.638654
ENSG00000258818	RNASE4	C	-0.422393	-0.121922	3.55188	1.3864	-1.77904	-0.573368	0.897472	-2.85417	-0.0848605
ENSG00000170801	HTRA3	C	1.8622	0.511661	3.98061	-0.718526	-0.81931	-0.799622	-1.49461	-0.921405	-1.60099
ENSG00000211677	IGLC2	C	-1.39516	-0.69482	3.31374	-0.458776	2.62851	0.79197	-1.39516	-1.39516	-1.39516
ENSG00000274110	LAIR1	C	-1.02579	-0.82517	4.66666	-0.195445	-0.881515	0.746994	-0.855524	-0.830806	-0.799409
ENSG00000132840	BHMT2	C	1.15982	-0.266103	4.46458	-0.633052	-0.651249	-0.868176	-1.06466	-1.51766	-0.623511
ENSG00000168004	PLAAT5	C	-0.360614	-0.707015	4.78815	-0.918883	-0.677964	-0.205187	-0.912092	-0.950287	-0.0561074
ENSG00000034971	MYOC	C	1.56483	3.20296	2.33144	-1.34407	-1.1802	-1.04151	-1.09596	-1.25258	-1.18491
ENSG00000235354	RPS29P16	C	2.15889	-1.83371	1.69576	1.56486	-1.83371	1.7557	-1.83371	0.159642	-1.83371
ENSG00000122679	RAMP3	C	1.28998	0.880989	3.23123	1.26136	0.191436	-1.45118	-1.46828	-2.01377	-1.92177
ENSG00000179144	GIMAP7	C	0.9398	1.78954	2.99943	0.760381	0.191016	-0.585307	-2.08547	-1.92391	-2.08547
ENSG00000048540	LMO3	C	-1.66897	-1.47116	2.54849	-0.114209	-1.0346	2.18676	-0.695477	-1.94537	2.19452
ENSG00000122971	ACADS	C	3.1493	1.11148	2.62297	-0.87223	-1.30782	-1.00391	-1.24908	-1.56464	-0.886057
ENSG00000069122	ADGRF5	C	1.41417	0.726415	2.36592	0.467937	0.388926	1.45137	-2.34566	-2.45735	-2.01172
ENSG00000214456	PLIN5	C	3.28724	0.602338	2.19218	0.199136	-2.08856	-1.17491	-0.0490298	-1.52242	-1.44597
ENSG00000108691	CCL2	C	0.257872	-0.523645	3.72127	-1.46802	1.56208	-0.729665	-2.24709	-1.15984	0.587039
ENSG00000145362	ANK2	C	2.25334	-0.289486	2.7951	-1.48205	-1.91132	1.86435	-1.29028	-1.29264	-0.647016
ENSG00000277494	GPIHBP1	C	0.943745	0.336538	2.86327	0.274209	0.637887	1.46766	-2.09367	-2.21873	-2.21091
ENSG00000176046	NUPR1	C	1.00335	0.395584	4.3388	-1.14935	-0.894832	-0.595928	-0.832994	-0.751067	-1.51356
ENSG00000130208	APOC1	C	0.0185382	-0.0193088	4.17938	-0.522309	-1.1895	0.179758	-1.26427	-2.11522	0.732925
ENSG00000135046	ANXA1	C	-1.58594	-1.1344	3.72257	-0.228089	-2.44427	0.705763	1.21233	-0.295722	0.047763
ENSG00000118804	STBD1	C	2.85345	0.461612	2.55254	-0.48551	-2.07118	0.450943	-1.12522	-2.14494	-0.49171
ENSG00000205336	ADGRG1	C	-0.731433	-1.03794	1.33467	2.80053	-1.16312	-0.923167	2.3045	-2.6288	0.0447534
ENSG00000101160	CTSZ	C	0.108073	-0.444701	4.0193	-1.00559	-1.48869	-0.161572	-0.961666	-1.61535	1.55019
ENSG00000025039	RRAGD	C	3.19	0.631514	2.13262	-1.33061	-1.9428	0.419443	-1.24166	-1.77588	-0.0826328
ENSG00000095970	TREM2	C	-1.07819	-1.07819	4.51746	0.258121	-0.0875161	0.229325	-0.94222	-1.07819	-0.740601
ENSG00000163131	CTSS	C	-1.86747	-1.84215	3.5536	0.508989	-1.85544	-0.643716	0.991673	0.860673	0.293841
ENSG00000254445	HSPB2-C11orf52	C	2.53329	1.14715	1.87118	0.320506	-0.195714	-1.56994	0.150178	-1.00799	-3.24867
ENSG00000172901	LVRN	C	0.753105	-0.376115	4.51283	-0.593973	-0.471097	-0.749583	-0.84243	-1.12455	-1.10819
ENSG00000169692	AGPAT2	C	-1.76484	-2.56973	3.55536	1.41232	-0.441564	-0.18616	0.696625	-0.506455	-0.195553
ENSG00000167772	ANGPTL4 ENSG00000167772	C	-0.6071	0.372401	4.41139	-1.1206	-0.991968	0.469994	-1.04039	-1.33885	-0.154876
ENSG00000196878	LAMB3	C	-0.734596	-1.28243	2.71118	2.24444	-1.25554	-1.25292	2.08625	-1.45877	-1.05762
ENSG00000125730	C3	C	0.427545	0.804061	4.10384	-0.644065	-1.14443	-2.09042	-0.229729	-0.0468519	-1.17996
ENSG00000129226	CD68	C	-1.31922	-1.39058	4.36691	0.474733	-0.275122	0.122088	-0.0320801	-1.24814	-0.698592
ENSG00000268790		C	-2.00351	-0.180557	2.62641	2.16575	-0.0808381	-2.00351	1.41087	-0.0823572	-1.85226
ENSG00000138061	CYP1B1	C	-0.687178	-1.26486	1.31291	-1.37369	-0.0947432	3.94013	-1.61424	-0.890429	0.672096
ENSG00000251038		C	-0.48465	-1.514	4.22714	-0.406732	-1.466	-0.0665093	0.913962	-1.22936	0.026158
ENSG00000180354	MTURN	C	-0.443285	-1.87851	2.99402	2.37858	-1.11946	-0.220186	0.879116	-2.08563	-0.504646
ENSG00000166927	MS4A7	C	-0.817501	-0.964289	3.69289	0.066299	1.29719	1.1866	-1.62767	-1.49658	-1.33694
ENSG00000105971	CAV2	C	-0.0249205	0.113088	4.24837	-0.263167	-0.437617	0.455112	-0.652885	-1.96579	-1.47218
ENSG00000197956	S100A6	C	-0.495632	-0.0600308	2.94922	1.31095	-3.10908	-1.02633	1.59297	-0.971389	-0.190671
ENSG00000137507	LRRC32	C	-0.514493	0.11225	3.43251	1.75465	-0.930815	-0.318569	0.524707	-2.34564	-1.71461
ENSG00000183549	ACSM5	C	1.21328	0.283926	4.18909	-1.18794	-0.654918	-0.68924	-1.18794	-0.933343	-1.03291
ENSG00000230018	PPIAP39	C	-0.424358	-0.592753	3.51075	1.4372	-1.08104	-1.45254	1.50782	-1.45254	-1.45254
ENSG00000204161	TMEM273	C	1.30649	1.29981	3.72151	-0.924295	-0.689355	-0.576324	-1.35652	-1.35856	-1.42276
ENSG00000150594	ADRA2A	C	-1.02885	-0.874528	4.47975	-0.476507	-1.14062	0.223703	0.0028006	-1.05303	-0.13272
ENSG00000135424	ITGA7	C	2.6486	0.38905	3.05182	-1.2361	-0.0693097	-0.789876	-1.91551	-0.807969	-1.27071
ENSG00000182568	SATB1	C	2.38091	-0.293817	0.522019	-1.33186	-1.51083	1.57198	-1.25537	-2.3078	2.22478
ENSG00000188643	S100A16	C	0.392924	-0.722262	2.72646	-0.0493121	-0.404735	1.25316	-2.50169	-2.35071	1.65615
ENSG00000204592	HLA-E	C	-3.44397	0.33286	2.61021	-1.03501	0.861595	1.13459	-1.37394	0.410306	0.503345
ENSG00000224646	RPS28P5	C	-1.05741	-1.05741	3.74775	-1.05741	1.47299	-1.05741	1.12374	-1.05741	-1.05741
ENSG00000188677	PARVB	C	2.96831	1.04557	2.02659	-0.574871	-1.02958	-0.590443	-2.45453	-1.52752	0.136482
ENSG00000278167	CCL18	C	-0.608974	-0.504177	4.62043	-0.608974	-0.608974	-0.462414	-0.608974	-0.608974	-0.608974
ENSG00000181019	NQO1	C	-0.903799	-1.82789	3.47956	1.19871	-1.72871	-0.148504	1.09085	-1.40263	0.242421
ENSG00000196196	HRCT1	C	0.584805	0.931133	4.15468	-0.879755	-0.936768	-0.722702	-1.08921	-1.08921	-0.952971
ENSG00000047457	CP	C	-1.27675	-0.979441	3.33085	-1.05356	-1.45369	-1.05872	2.30632	0.56421	-0.379222
ENSG00000128284	APOL3	C	1.44961	0.97983	3.40041	-0.751838	0.125568	-0.165481	-1.74494	-1.46167	-1.83149
ENSG00000163520	FBLN2	C	-0.778774	-0.886775	2.58281	2.22126	-1.98174	-0.789159	1.90185	-1.09896	-1.17051
ENSG00000170458	CD14	C	-0.18986	-0.524995	3.61905	0.133207	0.732607	1.14717	-1.13467	-1.83486	-1.94765
ENSG00000074416	MGLL	C	-0.00565435	-0.863814	3.10611	1.90488	-1.60603	-0.724913	1.28227	-1.26507	-1.82779
ENSG00000162511	LAPTM5	C	-1.70375	-1.39411	4.07635	0.483996	-0.27985	0.773268	-0.665388	-0.502236	-0.788276
ENSG00000082397	EPB41L3	C	-0.485792	-1.38448	2.46973	0.418978	2.12848	-1.66889	-0.296859	1.28253	-2.4637
ENSG00000169908	TM4SF1	C	0.955593	0.707436	2.62146	0.163783	0.070276	0.658432	-0.591296	-3.65244	-0.933248
ENSG00000147852	VLDLR	C	2.44689	-0.21494	3.14852	-0.752866	-1.32944	0.449941	-1.32954	-1.02559	-1.39298
ENSG00000110079	MS4A4A	C	-0.100995	-0.415188	4.14503	-0.503339	0.129434	0.667896	-1.30761	-1.30761	-1.30761
ENSG00000109107	ALDOC	C	-0.782711	-1.62373	3.49126	1.22541	-1.2134	-0.644476	1.1068	0.193789	-1.75294
ENSG00000228522		C	1.37002	-0.60602	3.69323	-1.19208	0.527297	-0.782386	-2.03884	-0.103645	-0.867576
ENSG00000130876	SLC7A10	C	-0.778609	-1.00029	4.40272	-0.0724589	-0.727042	-0.712988	0.284949	-0.642914	-0.753367
ENSG00000257767		C	0.285374	-1.59581	3.65475	0.31457	-0.0557709	-0.634559	-1.59563	-1.59581	1.22288
ENSG00000105357	MYH14	C	2.7936	0.956647	1.36701	0.484921	-2.42482	-1.15038	0.00444444	-2.22856	0.197133
ENSG00000158869	FCER1G	C	-1.13742	-0.635288	4.11724	0.17297	0.109539	0.480786	-1.73525	-0.947768	-0.424809
ENSG00000248144	ADH1C	C	0.539348	2.50376	3.15094	-1.08356	-1.08356	-1.08356	-1.08356	-1.08356	-0.776253
ENSG00000164128	NPY1R	C	-0.666557	0.079682	4.31874	-0.937801	-0.306938	-0.0587965	-1.17257	-1.18832	-0.0674424
ENSG00000262243	CES1	C	1.11583	-0.796564	4.18985	-0.796564	-0.796564	-0.796564	-0.66116	-0.661702	-0.796564
ENSG00000145107	TM4SF19	C	-1.50852	-0.849457	4.25618	0.206085	-0.5728	0.151358	-0.480952	-1.02602	-0.175883
ENSG00000155659	VSIG4	C	-0.328716	0.0656051	4.00968	-0.358638	0.0908068	0.740945	-1.40656	-1.40656	-1.40656
ENSG00000186493	C5orf38 ENSG00000186493	C	-1.62987	-0.962891	2.76655	-0.367918	1.88754	-1.73631	0.528021	1.25119	-1.73631
ENSG00000168497	CAVIN2	C	1.79834	1.1464	3.22451	-0.679786	-1.06011	-0.231209	-1.15925	-1.87912	-1.15977
ENSG00000148180	GSN	C	0.128622	0.473562	3.85635	0.104125	-2.07206	-0.805682	0.281195	-0.380282	-1.58584
ENSG00000137767	SQOR	C	2.36431	0.742101	3.09243	-1.04104	-1.39169	-1.05502	-0.356529	-1.21399	-1.14058
ENSG00000133800	LYVE1	C	1.09672	0.994427	3.46333	-0.00177917	-0.723863	0.0306769	-1.51757	-1.70469	-1.63725
ENSG00000253293	HOXA10	C	2.67471	-1.32459	1.75113	-1.32388	1.33083	-1.23968	-2.23576	0.658726	-0.291486
ENSG00000211895	IGHA1	C	-1.09235	0.179683	2.23868	-0.763092	3.41321	-0.699093	-1.09235	-1.09235	-1.09235
ENSG00000099282	TSPAN15	C	-0.535474	-1.44444	3.81413	0.872753	-0.0368076	0.415936	-0.301632	-1.97814	-0.806323
ENSG00000152954	NRSN1	C	0.22344	0.333917	4.27491	-0.737095	-0.608689	-0.683704	-0.738222	-1.04237	-1.02218
ENSG00000108960	MMD	C	-1.82881	-2.01003	3.5536	-0.079733	-0.583974	1.02452	-0.125588	-0.688257	0.738269
ENSG00000228284	HLA-DQA1	C	-0.539054	-0.557872	3.30904	-0.415571	-0.21162	-0.459078	2.20665	-1.69828	-1.63421
ENSG00000162444	RBP7	C	-0.359041	-0.588927	4.22995	-1.48631	-0.82482	0.13367	0.297034	-0.843101	-0.558458
ENSG00000124785	NRN1	C	-0.00788233	-0.107335	2.86937	-1.28505	1.09337	-0.249667	-1.7756	1.72232	-2.25952
ENSG00000106733	NMRK1	C	0.744341	-1.53897	1.50465	2.26069	-0.908591	-0.590773	1.80534	-2.69117	-0.585505
ENSG00000160255	ITGB2	C	-0.862399	-0.963134	4.28061	-0.31626	-0.474502	-0.198519	-0.514484	-1.24668	0.295363
ENSG00000142910	TINAGL1	C	1.09019	1.31748	3.39722	-0.284626	-0.82311	-0.367325	-1.06038	-2.06413	-1.20532
ENSG00000106823	ECM2	C	-0.62397	-0.295891	3.53782	0.451904	1.07663	-0.640738	-0.858832	-0.0883376	-2.55858
ENSG00000010932	FMO1	C	-1.39138	-1.29574	2.92652	-1.25289	-1.38645	0.158006	2.39696	0.453791	-0.608815
ENSG00000197614	MFAP5	C	1.68746	1.29049	3.21347	-0.762145	-0.956904	-0.439624	-1.19579	-1.54671	-1.29025
ENSG00000188783	PRELP	C	-0.517998	0.459476	3.75504	-0.812531	-1.17046	-1.6299	1.00007	0.199185	-1.28289
ENSG00000106034	CPED1	C	1.46767	-0.316187	3.26351	-1.06891	-1.73059	0.685102	-0.851136	-1.87384	0.424383
ENSG00000135604	STX11	C	-0.576816	-0.276362	4.38974	-0.530355	-0.603246	-0.279201	-0.643365	-0.744868	-0.735528
ENSG00000167641	PPP1R14A	C	0.705761	2.03072	3.04632	-0.834804	-1.02208	0.253796	-1.46783	-1.75831	-0.953568
ENSG00000185885	IFITM1	C	-0.206087	0.396459	2.95969	1.18411	-1.60528	-0.265013	0.0506641	-2.90896	0.394419
ENSG00000121552	CSTA	C	-0.370379	-0.302464	4.34222	-0.810227	-0.264133	-0.810227	-0.810227	-0.510216	-0.464351
ENSG00000152270	PDE3B	C	-1.54551	-1.71356	3.96639	0.185792	-0.148353	-0.130213	-0.528476	0.118136	-0.204205
ENSG00000266964	FXYD1	C	2.69477	0.705628	0.895829	0.80481	-2.84709	-0.423298	0.324176	-1.91527	-0.239553
ENSG00000136167	LCP1	C	-1.74499	-1.48171	3.55284	-0.204965	-1.45227	-0.37688	0.802692	0.552489	0.352799
ENSG00000130173	ANGPTL8	C	-0.900456	-1.6175	3.87799	0.515147	-1.40075	0.365043	-0.125745	-0.610552	-0.103182
ENSG00000282228	PAM16	C	2.38414	1.09861	2.23139	-1.3122	-1.3122	-1.3122	0.84688	-1.3122	-1.3122
ENSG00000099998	GGT5	C	-1.38718	-0.554975	2.24359	2.8039	-0.540388	-0.987631	-0.207055	-2.05847	0.688218
ENSG00000174059	CD34	C	0.484848	0.283376	2.84935	0.532195	0.206002	1.18428	-1.55208	-2.54491	-1.44306
ENSG00000148926	ADM	C	-1.00293	-0.800572	3.74597	0.471481	-1.18812	1.07107	-0.366211	-1.47847	-0.452227
ENSG00000124942	AHNAK	C	0.462064	-0.873727	3.12903	1.07025	-1.3821	0.0828788	0.319015	-2.64066	-0.166753
ENSG00000111245	MYL2	D	10.3899	9.0163	-3.46511	-2.18117	-2.74084	-1.63239	-2.86845	-2.52225	-3.99601
ENSG00000143632	ACTA1	D	10.022	7.27182	-3.58003	-2.90994	-3.27272	-2.332	-2.7335	1.79182	-4.25742
ENSG00000104879	CKM	D	9.5779	7.07084	-4.11166	-2.12778	-2.84056	-2.4702	-2.62186	1.0438	-3.52048
ENSG00000092054	MYH7	D	9.60458	7.66557	-3.05702	-2.52063	-2.53411	-2.41662	-2.56528	-1.06018	-3.1163
ENSG00000198125	MB	D	9.55605	7.6041	-2.36641	-1.77331	-2.4314	-2.21537	-2.45765	-2.37134	-3.54467
ENSG00000114854	TNNC1	D	8.44543	6.99994	-3.6031	-0.247825	-3.6721	-2.58283	-0.775531	-1.09135	-3.47263
ENSG00000156885	COX6A2	D	8.67078	6.96169	-3.37919	-1.00839	-2.29992	-1.81483	-2.10334	-2.50638	-2.52041
ENSG00000196091	MYBPC1	D	9.09272	6.20386	-3.3745	-0.868391	-1.8835	-2.24385	-2.54918	-0.948034	-3.42912
ENSG00000168530	MYL1	D	8.88391	5.48298	-3.48916	-1.41159	-3.48916	-2.18843	-2.30957	1.85828	-3.33725
ENSG00000159173	TNNI1	D	8.43858	6.9198	-3.62779	-1.20097	-2.19103	-1.80398	-2.50933	-1.40303	-2.62226
ENSG00000101470	TNNC2	D	8.3167	4.57624	-1.83872	-1.76546	-3.28186	-3.27078	-1.9095	2.75647	-3.58308
ENSG00000180209	MYLPF	D	8.92871	5.19168	-2	-1.10354	-2.23657	-1.22872	-2.44788	-1.9772	-3.12647
ENSG00000125414	MYH2	D	9.08144	4.77661	-2.04129	-2.1568	-1.8541	-2.31689	-2.54084	-0.0785024	-2.86963
ENSG00000239474	KLHL41	D	8.27538	6.02425	-2.85635	-1.35242	-1.78678	-1.9702	-1.91775	-1.54132	-2.8748
ENSG00000173991	TCAP	D	7.92279	6.34868	-3.35436	-0.909053	-2.25446	-2.14594	-1.31374	-2.06317	-2.23075
ENSG00000175084	DES	D	7.58348	5.28805	1.04213	-1.98659	-4.29475	-3.19946	-1.80485	0.850567	-3.47857
ENSG00000170290	SLN	D	7.24463	5.97973	-2.83506	-0.655634	-4.04621	-0.682272	-2.51615	-3.1617	0.672658
ENSG00000077522	ACTN2	D	7.76862	5.38899	-2.76957	-3.07046	-1.96757	-1.13629	-2.62925	0.647062	-2.23154
ENSG00000168333	PPDPFL	D	7.52615	5.93963	-0.55749	-2.09505	-2.38031	-1.88616	-1.9474	-2.21906	-2.38031
ENSG00000130598	TNNI2	D	7.53501	4.24654	-1.3193	-1.06303	-3.89164	-3.00864	-1.21001	2.18712	-3.47605
ENSG00000186439	TRDN	D	7.21303	6.02697	-0.701737	-2.09345	-2.43039	-2.36991	-2.55912	-0.429022	-2.65637
ENSG00000129170	CSRP3	D	7.2147	5.64168	-2.66316	-1.84686	-2.23044	-2.32675	-2.32361	0.75408	-2.21963
ENSG00000170807	LMOD2	D	7.51888	5.49417	-2.3275	-1.86416	-2.27343	-2.06773	-2.16488	-0.299752	-2.01561
ENSG00000183091	NEB	D	7.48561	5.25857	-2.47836	-1.91299	-1.33398	-1.78325	-2.78742	0.228943	-2.67712
ENSG00000105048	TNNT1	D	6.15812	4.90931	-5.12209	0.404562	-4.13658	0.125527	0.0800814	-2.62663	0.207696
ENSG00000154553	PDLIM3	D	6.97106	5.23675	0.464208	-2.09874	-3.04946	-1.95868	-1.90363	-0.0173717	-3.64415
ENSG00000160808	MYL3	D	6.71957	5.40024	-2.5417	-1.23034	-3.61982	-1.49922	-1.54407	1.28049	-2.96516
ENSG00000164879	CA3	D	7.09067	5.52103	-3.49687	-0.526998	-1.14705	-1.17737	-1.31598	-2.73277	-2.21466
ENSG00000163092	XIRP2	D	7.10612	5.70624	-2.05267	-1.98794	-1.92673	-1.93726	-1.9217	-0.933378	-2.05267
ENSG00000197893	NRAP	D	7.17857	5.56121	-2.14178	-1.87321	-2.07715	-1.93073	-1.94483	-0.630302	-2.14178
ENSG00000164708	PGAM2	D	7.3378	4.84826	-0.823588	-1.31374	-2.71585	-3.2769	-0.798684	-0.295639	-2.96165
ENSG00000068976	PYGM	D	7.58955	4.35706	-1.92576	-1.87074	-2.77239	-2.69841	-0.385273	0.297461	-2.5915
ENSG00000091482	SMPX	D	7.22836	5.25094	-2.26201	-2.03575	-1.9487	-0.256893	-2.26201	-2.26201	-1.45192
ENSG00000122367	LDB3	D	7.25785	5.20671	-2.23315	-1.65972	-2.45028	-2.18861	-1.98214	-0.499841	-1.45083
ENSG00000143318	CASQ1 ENSG00000143318	D	7.09112	4.64115	-2.54211	-2.10646	-2.43913	-1.85454	-1.49705	1.24192	-2.53489
ENSG00000188536	HBA2	D	2.71857	6.14349	1.55402	0.918383	-0.396089	-1.00961	-0.762016	-6.49899	-2.66776
ENSG00000124701	APOBEC2	D	6.83568	5.10721	-2.29711	-1.41254	-1.95783	-2.35181	-1.78512	-0.191097	-1.94737
ENSG00000240045	STRIT1	D	6.39618	5.68591	-2.07032	-1.351	-2.0186	-1.64083	-1.54785	-1.14266	-2.31082
ENSG00000272573	MUSTN1	D	6.05949	4.89719	1.03437	-0.507544	-1.24941	-2.31707	-2.73591	-3.22919	-1.95192
ENSG00000130595	TNNT3	D	6.65967	2.94185	-1.39637	0.475911	-3.66899	-3.70926	0.205768	0.869391	-2.37797
ENSG00000138100	TRIM54	D	6.6216	4.84225	-2.10435	-2.00648	-1.91598	-1.64057	-1.36404	-0.697649	-1.73477
ENSG00000173641	HSPB7	D	5.60202	3.7259	3.03583	-1.19357	-2.23554	-3.48741	-1.47229	-0.904289	-3.07066
ENSG00000198523	PLN	D	6.28853	4.44739	1.07731	-1.30631	-1.64181	-1.98499	-2.22112	-2.23035	-2.42865
ENSG00000004776	HSPB6	D	4.99028	3.69308	2.95584	0.164058	-2.96104	-2.63237	-0.0152317	-3.37901	-2.81561
ENSG00000164309	CMYA5	D	6.59789	4.00983	-2.43893	-2.47894	0.0243082	-0.851895	-2.46481	-0.802446	-1.595
ENSG00000004799	PDK4	D	4.49461	3.51591	4.26659	-1.39779	-1.83417	-1.10876	-3.00488	-3.10602	-1.82548
ENSG00000182676	PPP1R27	D	6.07489	4.91731	-1.73828	-1.35103	-1.9157	-1.77971	-1.21362	-1.41573	-1.57814
ENSG00000101210	EEF1A2	D	4.94286	2.44028	-4.81276	0.812696	1.15962	-3.27447	0.0365645	1.71414	-3.01893
ENSG00000177791	MYOZ1	D	6.50422	3.7244	-2.96247	-0.0862199	-2.77501	-0.683908	-0.682321	-1.40873	-1.62996
ENSG00000172399	MYOZ2	D	6.27355	4.57534	-1.59048	-1.60056	-1.68544	-1.44643	-1.65889	-1.13321	-1.7339
ENSG00000086967	MYBPC2	D	7.0779	3.10958	-2.31971	-0.950127	-1.84044	-1.59549	-1.14788	-1.1462	-1.18763
ENSG00000116748	AMPD1	D	6.39513	4.05651	-1.81995	-1.33288	-1.83763	-1.91509	-1.53775	-0.0932593	-1.91509
ENSG00000036448	MYOM2	D	5.81892	4.15038	-2.79996	-0.164101	-0.535262	-2.18487	0.231514	-1.89346	-2.62316
ENSG00000101306	MYLK2	D	6.45203	3.88258	-2.10885	-1.53207	-1.83657	-1.43088	-1.60286	-0.267836	-1.55552
ENSG00000163380	LMOD3	D	6.41771	4.09605	-1.58889	-1.27789	-1.55329	-1.60212	-1.616	-1.24756	-1.62799
ENSG00000160678	S100A1	D	5.59213	3.82947	1.42332	-0.186701	-2.25938	-2.51285	-0.81791	-3.05081	-2.01727
ENSG00000168509	HJV	D	6.34421	4.08239	-1.4683	-1.2775	-1.68004	-1.77765	-1.46841	-0.97704	-1.77765
ENSG00000131730	CKMT2	D	5.80009	4.3243	-0.135674	-1.75287	-2.33765	-0.912299	-2.56238	-0.850198	-1.57332
ENSG00000109846	CRYAB	D	4.47004	2.88779	3.36316	-1.48739	-2.17796	-3.35608	-1.24911	0.903455	-3.3539
ENSG00000165887	ANKRD2	D	5.3506	4.22613	-2.77873	-2.27842	-2.45304	-0.0496705	-2.27156	-0.0724877	0.327185
ENSG00000196296	ATP2A1	D	6.65052	1.827	-3.90834	-1.05691	-1.17633	-1.42086	-0.867529	0.872297	-0.919848
ENSG00000120729	MYOT	D	6.12141	3.9527	-2.66366	-1.0551	-1.20162	-1.17313	-1.70314	-0.995374	-1.28208
ENSG00000111046	MYF6	D	5.96527	4.32006	-1.5901	-1.34616	-1.5901	-1.5901	-1.51847	-1.06031	-1.5901
ENSG00000214872	SMTNL1	D	5.81004	4.30218	-1.66788	-0.798243	-1.43439	-1.46792	-1.69705	-1.45591	-1.59083
ENSG00000171033	PKIA	D	4.49626	1.833	-3.42263	-2.95116	2.37207	-0.316271	-3.34656	2.14958	-0.814295
ENSG00000079393	DUSP13	D	5.92652	4.04886	-1.24566	-1.54887	-1.54887	-1.1376	-1.46914	-1.47637	-1.54887
ENSG00000206172	HBA1	D	2.19029	5.81392	1.00803	0.40996	-1.11401	-1.09155	-0.874772	-4.17822	-2.16364
ENSG00000109061	MYH1	D	6.90909	0.739691	-1.43198	-1.3058	-1.66248	-1.56122	-1.5601	1.56412	-1.69132
ENSG00000177354	C10orf71	D	5.99284	3.6828	-1.68887	-1.12693	-1.64287	-1.39049	-1.48474	-1.65395	-0.687784
ENSG00000115593	SMYD1	D	5.96116	3.72209	-1.56474	-1.46448	-1.45764	-1.47283	-1.54317	-0.615659	-1.56474
ENSG00000215861		D	5.31705	3.7281	1.50904	-1.57391	-2.05443	-1.6283	-1.66334	-2.05443	-1.57979
ENSG00000169271	HSPB3	D	5.57419	4.12398	-0.302071	-1.69427	-1.69427	-1.44606	-1.69427	-1.17295	-1.69427
ENSG00000133878	DUSP26	D	5.78382	3.51356	-1.99508	-0.192085	-1.28128	-1.99508	-0.300669	-1.53812	-1.99508
ENSG00000010282	HHATL ENSG00000010282	D	5.24563	3.30072	-1.64349	1.11969	-1.96819	-2.5945	-0.0288125	-0.833279	-2.59778
ENSG00000163157	TMOD4	D	5.51178	3.48034	-2.81665	-0.268692	-1.49454	-2.0008	-1.61136	0.217564	-1.01764
ENSG00000161281	COX7A1	D	4.39566	3.33667	1.74472	0.0239368	-0.89479	-3.30075	-0.665773	-0.903553	-3.73611
ENSG00000168334	XIRP1	D	5.90075	3.51788	-1.32303	-1.39655	-1.34807	-1.39655	-1.35011	-1.29379	-1.31054
ENSG00000172403	SYNPO2	D	5.35462	3.19365	1.64594	-1.26945	-2.0824	-1.36464	-1.72372	-1.74244	-2.01156
ENSG00000185739	SRL	D	5.96492	3.3272	-1.01853	-1.42236	-1.27149	-1.47651	-1.5516	-0.976805	-1.57482
ENSG00000112183	RBM24	D	5.81391	3.39963	-0.39068	-1.63456	-1.99167	-1.12986	-1.43493	-1.04438	-1.58746
ENSG00000108823	SGCA ENSG00000108823	D	5.33805	3.11944	-1.98001	1.24124	-0.819057	-1.61067	-0.503417	-2.2402	-2.54538
ENSG00000163110	PDLIM5	D	5.43676	3.42347	0.255117	-0.991089	-3.0896	-1.36531	-0.958813	-1.18993	-1.52061
ENSG00000158022	TRIM63	D	5.22737	4.1439	-1.11307	-1.64074	-1.64074	-1.64074	-1.32414	-0.459839	-1.55199
ENSG00000134020	PEBP4	D	5.74251	3.39954	-1.62863	-0.932877	-1.56998	-1.11284	-1.02952	-1.65606	-1.21215
ENSG00000029534	ANK1	D	5.54655	3.62697	-1.4911	-0.854907	-1.54287	-1.34702	-1.49949	-1.07501	-1.36311
ENSG00000184544	DHRS7C	D	5.67912	3.39222	-1.08658	-1.50508	-1.35911	-1.50508	-1.39026	-0.720138	-1.50508
ENSG00000155657	TTN	D	5.40388	3.38287	-2.73074	-0.619342	-0.600322	-0.815707	-1.13648	-0.823335	-2.06082
ENSG00000119938	PPP1R3C	D	5.707	2.6771	0.856206	-1.39483	-1.40791	-0.793842	-2.00216	-1.77591	-1.86565
ENSG00000148377	IDI2	D	5.59925	3.48346	-1.32481	-1.47667	-1.11441	-1.34889	-1.47667	-1.1937	-1.14757
ENSG00000164122	ASB5	D	5.45481	3.5798	-1.49696	-1.32974	-1.35988	-1.49696	-1.49696	-0.357134	-1.49696
ENSG00000135447	PPP1R1A	D	4.26296	2.14947	3.63533	-1.92121	-2.2705	-1.31714	-1.68721	-2.03041	-0.821286
ENSG00000157119	KLHL40 ENSG00000157119	D	5.48607	3.41255	-1.32434	-1.32985	-1.40037	-1.40037	-1.28556	-0.757761	-1.40037
ENSG00000244734	HBB	D	1.70439	5.32869	0.982635	-2.38245	-1.16001	-1.82396	1.27187	-2.68322	-1.23795
ENSG00000108515	ENO3	D	5.75312	2.58399	-2.69922	-0.73352	-1.29974	-1.20936	-0.675308	-0.696265	-1.02369
ENSG00000138347	MYPN	D	5.62267	3.10794	-1.43868	-1.20408	-1.22341	-1.32905	-1.26002	-1.09523	-1.18016
ENSG00000152137	HSPB8	D	4.747	2.85078	1.7089	-0.429964	-1.92215	-1.2237	-0.928569	-2.925	-1.8773
ENSG00000077009	NMRK2	D	5.10128	3.5438	-1.32781	-1.02944	-1.813	-1.813	-0.397685	-0.866497	-1.39764
ENSG00000132429	POPDC3	D	5.3764	3.26989	-1.30126	-0.994987	-1.59387	-1.34654	-1.48466	-1.17278	-0.752189
ENSG00000100628	ASB2	D	5.31976	3.2817	-1.03217	-0.636243	-1.63245	-1.76627	-1.18101	-0.821899	-1.53142
ENSG00000274137	MYOM2	D	4.55	3.91304	-1.90951	0.119454	-0.173259	-1.9679	-1.56514	-1.10021	-1.86647
ENSG00000182253	SYNM	D	4.84471	2.66827	1.61241	-0.671522	-1.11143	-2.01631	-0.851848	-1.55573	-2.91856
ENSG00000178821	TMEM52	D	4.63583	2.02234	-1.92596	1.50973	-2.20853	-2.49477	1.60711	-1.83736	-1.30839
ENSG00000139914	FITM1	D	5.29262	3.23835	-2.10613	-0.834189	-0.974593	-1.6085	-0.909271	-1.01552	-1.08277
ENSG00000140986	RPL3L ENSG00000140986	D	5.35737	3.14926	-1.90543	-1.08611	-1.16424	-1.23639	-0.876146	-0.763589	-1.47472
ENSG00000142661	MYOM3	D	4.79934	3.67628	-2.1603	-0.3916	-0.773053	-1.83023	-0.90123	-1.83289	-0.58632
ENSG00000102683	SGCG	D	4.11285	2.20966	1.56424	-2.45462	1.72562	-2.45462	-2.45462	-0.126345	-2.12217
ENSG00000081248	CACNA1S	D	5.61522	2.71455	-1.37628	-1.21742	-1.35615	-1.35038	-1.29905	-0.390303	-1.34019
ENSG00000170681	CAVIN4	D	5.31941	3.18285	-1.43279	-1.40531	-1.19844	-0.985511	-1.28743	-0.999962	-1.19282
ENSG00000108878	CACNG1	D	5.44284	2.9948	-1.40667	-0.882701	-1.29869	-1.14215	-1.24172	-1.24657	-1.21914
ENSG00000185482	STAC3	D	4.8159	3.20167	-3.1511	-0.549753	-0.1872	-1.09906	-1.05762	-0.318068	-1.65477
ENSG00000188176	SMTNL2	D	5.74189	2.37833	-1.47628	-1.15848	-0.720548	-0.9409	-1.42562	-1.05482	-1.34358
ENSG00000133454	MYO18B	D	5.24645	3.21971	-1.2548	-1.12395	-1.06354	-1.32354	-1.26564	-1.11115	-1.32354
ENSG00000163126	ANKRD23	D	5.10243	3.08624	-2.31818	-0.603256	-1.10033	-1.08128	-1.55544	-0.0842322	-1.44595
ENSG00000196218	RYR1	D	4.5609	1.56714	-2.9942	1.27252	-2.37028	-1.51197	1.28527	0.276821	-2.08621
ENSG00000170162	VGLL2	D	4.96637	3.48229	-1.33141	-1.33141	-1.33141	-1.23309	-1.33141	-0.558516	-1.33141
ENSG00000130957	FBP2	D	5.48525	2.3077	-2.24983	-0.880432	-0.0494317	-1.67948	-1.13359	-0.400908	-1.39928
ENSG00000130528	HRC	D	4.98122	3.35556	-1.02449	-1.60047	-1.38751	-0.713617	-1.12714	-0.753609	-1.72995
ENSG00000151729	SLC25A4	D	4.59248	3.05386	-0.435975	-0.855861	-1.16255	-3.00264	0.147319	-0.11815	-2.21848
ENSG00000156219	ART3	D	5.46269	2.5577	-1.40212	-1.12288	-0.932291	-1.33737	-0.78455	-1.19384	-1.24734
ENSG00000214097	SMCO1	D	5.26304	2.83961	-1.3162	-1.23097	-0.880225	-1.165	-1.16347	-1.21852	-1.12826
ENSG00000136842	TMOD1	D	4.58484	2.19745	2.25358	-1.6649	-1.33141	-1.70634	-1.61921	-1.07562	-1.6384
ENSG00000136383	ALPK3	D	4.99854	2.77395	0.0320578	-0.913499	-1.1441	-0.493208	-1.96861	-1.53908	-1.74605
ENSG00000122477	LRRC39	D	5.05445	2.92294	-1.59246	-0.532424	-0.885034	-0.717566	-1.23087	-1.49583	-1.52321
ENSG00000188716	DUSP29	D	4.58406	3.64227	-1.22688	-1.22688	-1.22688	-1.22688	-0.865047	-1.22688	-1.22688
ENSG00000121769	FABP3	D	4.49819	3.44442	-0.833937	-0.837256	-1.83445	-0.299432	-1.54575	-2.06716	-0.524619
ENSG00000101605	MYOM1	D	4.97039	3.00296	-0.500676	-0.888288	-1.67818	-1.10225	-1.36277	-1.4424	-0.998778
ENSG00000139780	METTL21C	D	4.39885	3.68719	-1.20333	-0.866048	-1.20333	-1.20333	-1.20333	-1.20333	-1.20333
ENSG00000132329	RAMP1	D	3.42929	1.85686	-1.9929	2.44564	-2.53294	-2.2096	0.95573	-2.09305	0.140956
ENSG00000182533	CAV3	D	5.09797	2.59547	-0.861636	-1.36423	-1.15468	-1.36423	-1.09005	-0.591724	-1.26689
ENSG00000175946	KLHL38	D	5.20854	2.37859	-1.22073	-1.12957	-0.585526	-1.13727	-1.16973	-1.12356	-1.22073
ENSG00000184489	PTP4A3	D	4.30248	1.50257	-2.44844	0.800519	-2.44844	-2.44844	1.27415	-0.0381052	-0.496295
ENSG00000146147	MLIP	D	4.81898	2.72943	-0.239386	-1.5574	-1.49378	-1.5673	-0.555485	-0.652499	-1.48256
ENSG00000187642	PERM1	D	4.57288	2.71653	-1.94492	0.219288	-1.52317	-1.02098	-0.293892	-1.75429	-0.971435
ENSG00000163833	FBXO40	D	4.80159	2.81038	-1.13726	-0.930447	-1.12099	-1.06995	-1.00435	-1.1937	-1.15527
ENSG00000178104	PDE4DIP	D	4.36725	2.45021	0.708006	-0.137092	-1.36608	-0.505218	-1.13128	-2.62792	-1.75788
ENSG00000154415	PPP1R3A	D	5.19851	2.0461	-1.05804	-1.01864	-1.05804	-1.05804	-1.05804	-0.935775	-1.05804
ENSG00000167549	CORO6	D	4.82781	2.59336	-0.30793	-0.992941	-1.09986	-1.08345	-1.19253	-1.40275	-1.34171
ENSG00000166592	RRAD ENSG00000166592	D	4.54696	2.73758	-0.60153	-1.4621	-1.29197	-1.76357	-0.175965	-0.6746	-1.31481
ENSG00000146054	TRIM7	D	3.51289	1.46944	-1.08441	2.28194	-1.31434	-2.59225	1.28176	-1.77251	-1.78251
ENSG00000143028	SYPL2	D	4.81333	2.23841	-0.516879	-0.507678	-1.59286	-0.52519	-0.981428	-1.69104	-1.23667
ENSG00000112782	CLIC5	D	4.58863	2.01568	0.753748	-1.5632	-1.38459	-0.0660334	-0.925889	-1.91003	-1.50832
ENSG00000198842	STYXL2	D	4.50586	2.90646	-0.910446	-1.00545	-1.13447	-0.755326	-1.20221	-1.20221	-1.20221
ENSG00000215187	FAM166B	D	4.84255	1.7078	0.745626	-1.02854	-1.4036	-0.879143	-1.8781	-1.13956	-0.967034
ENSG00000278817		D	4.1636	2.02001	-0.333165	0.911343	-1.59964	-2.44175	0.398098	-1.05133	-2.06716
ENSG00000104369	JPH1	D	4.3753	1.07966	-2.34967	1.18193	-2.02789	-0.329774	0.771559	-1.87176	-0.829349
ENSG00000228080	HLA-DRB1	D	1.58657	2.49928	-0.787413	1.81118	2.76102	-2.08724	-1.63233	-1.91292	-2.23814
ENSG00000149596	JPH2	D	4.78374	2.2509	-0.219465	-1.21893	-0.934918	-0.825512	-1.30984	-1.19539	-1.33058
ENSG00000183386	FHL3 ENSG00000183386	D	5.03647	1.57733	-1.60669	-0.756541	-0.931652	-0.265118	-1.49625	-1.28649	-0.271064
ENSG00000162614	NEXN	D	3.99502	3.13294	-0.202149	-1.95039	-0.461065	-0.971244	-1.70212	-0.446897	-1.39409
ENSG00000163827	LRRC2	D	4.5956	2.53758	-0.293681	-0.887274	-0.829865	-1.21919	-1.31615	-1.12173	-1.46529
ENSG00000174429	ABRA	D	4.65812	2.42814	-1.2788	-1.1531	-1.10489	-1.05801	-0.98569	-0.386055	-1.11972
ENSG00000022267	FHL1	D	3.83393	1.5233	2.36531	-0.670876	-0.943378	-0.926684	-2.49775	-1.23774	-1.44611
ENSG00000177752	YIPF7	D	4.4507	2.63365	-1.14474	-0.585174	-0.8218	-0.616944	-1.14889	-1.3834	-1.3834
ENSG00000167476	JSRP1	D	4.52802	2.36201	-1.87453	-0.864014	-0.296014	-1.11271	-0.497847	-1.03821	-1.2067
ENSG00000168899	VAMP5	D	3.33226	1.65737	2.24718	-0.0569394	-0.146006	-1.14741	-1.03048	-1.71012	-3.14587
ENSG00000187193	MT1X	D	3.14843	2.31826	2.27009	-0.266706	-2.01929	-1.76685	-0.208542	-1.87635	-1.59904
ENSG00000227877	MRLN	D	4.24514	2.88763	-0.856506	-1.03369	-1.16661	-0.924349	-1.27332	-1.01524	-0.863058
ENSG00000164440	TXLNB	D	4.21944	1.78862	-2.4046	0.583576	-0.123258	-1.09011	-0.333239	-0.451089	-2.18934
ENSG00000146809	ASB15	D	4.89196	1.77435	-0.97776	-0.906711	-0.931395	-0.97776	-0.97776	-0.917169	-0.97776
ENSG00000137198	GMPR	D	4.08637	2.1267	-0.20677	-0.213187	-2.68592	-0.743308	-0.587117	-1.89649	0.11972
ENSG00000141161	UNC45B	D	4.58622	2.08074	-1.21224	-1.18846	-1.21313	-1.13038	-0.413975	-0.456608	-1.05216
ENSG00000284931		D	-0.144342	5.23584	-0.0960663	-0.981739	-0.195956	-0.598586	-1.17172	-0.875723	-1.17172
ENSG00000277564	RBFOX2	D	2.50526	0.328095	-2.10012	2.67708	-0.732689	-0.403589	2.04247	-2.15263	-2.16387
ENSG00000118729	CASQ2	D	3.81666	2.62134	-0.804075	-0.0943983	-1.10765	-0.601285	-2.75198	-0.163018	-0.915595
ENSG00000139292	LGR5	D	2.41549	-0.242815	-1.61642	-0.897755	-1.84114	3.3632	-1.08822	-1.88169	1.78936
ENSG00000065675	PRKCQ	D	4.52438	2.16507	-0.4923	-1.1011	-0.983077	-0.960287	-1.06942	-0.982163	-1.1011
ENSG00000007314	SCN4A	D	4.15653	1.67146	1.55802	-0.849616	-1.17909	-1.26287	-1.30252	-1.30814	-1.48379
ENSG00000164093	PITX2	D	4.31168	2.43858	-1.22115	-0.673805	-1.36807	-1.24471	-0.806951	-1.04444	-0.391132
ENSG00000185100	ADSS1	D	4.03865	1.99196	-1.26917	0.700792	-1.97316	-1.21043	0.252428	-0.812231	-1.71883
ENSG00000205678	TECRL	D	4.27207	2.33258	-1.39066	-0.259956	-0.984038	-1.28482	-0.426705	-1.03897	-1.21951
ENSG00000078328	RBFOX1	D	3.09538	0.921841	-2.5848	0.066284	1.58165	-2.20534	0.301774	1.1125	-2.28929
ENSG00000172995	ARPP21	D	4.29765	2.32463	-1.14994	-0.975999	-1.14994	-1.09926	-0.189709	-1.05309	-1.00436
ENSG00000198892	SHISA4	D	4.21309	1.54496	-0.665796	0.418549	-2.18603	-0.459554	-0.379577	-2.18719	-0.298459
ENSG00000165410	CFL2 ENSG00000165410	D	4.0593	2.35815	0.324526	-1.22171	-1.5041	-0.478114	-1.2767	-1.28609	-0.975252
ENSG00000154358	OBSCN	D	3.82613	1.65022	-3.08287	0.38647	-1.02417	-0.455478	0.263874	-1.36755	-0.19662
ENSG00000198467	TPM2	D	4.26783	2.16275	-1.6162	-1.04438	-0.23884	-0.754745	-1.20313	-0.662735	-0.910533
ENSG00000273607	CHCHD10	D	3.67188	2.09515	1.30596	-0.316865	-1.29072	-1.82197	-0.630289	-1.34024	-1.67291
ENSG00000092529	CAPN3	D	4.30425	1.72585	-1.06142	0.121373	-0.360654	-0.699171	-0.583284	-1.78857	-1.65836
ENSG00000143365	RORC	D	4.15588	2.2595	0.034672	-1.0271	-1.01324	-1.22339	-0.9656	-1.06108	-1.15965
ENSG00000160097	FNDC5	D	4.38692	1.92538	-1.02245	-0.335885	-1.22511	-0.898745	-0.989437	-1.13834	-0.70233
ENSG00000213144		D	3.85557	2.71626	-0.20312	-1.10475	-1.10475	-1.10475	-0.844953	-1.10475	-1.10475
ENSG00000100033	PRODH	D	2.42608	-0.200627	-0.820681	2.28637	-1.30038	-1.47032	2.64715	-1.91019	-1.65741
ENSG00000130433	CACNG6	D	4.50315	1.76144	-0.831982	-0.954667	-0.954667	-0.954667	-0.954667	-0.800523	-0.813416
ENSG00000227048		D	4.00406	2.5689	-0.938994	-0.938994	-0.938994	-0.938994	-0.938994	-0.938994	-0.938994
ENSG00000071282	LMCD1	D	3.71354	1.44358	1.63936	-1.13371	-0.165399	-1.50191	-2.22823	-0.735065	-1.03217
ENSG00000070808	CAMK2A	D	4.46792	1.6788	-1.1	-0.638458	-1.03712	-1.14043	-0.356236	-0.996896	-0.877583
ENSG00000166317	SYNPO2L	D	3.92729	1.85735	-2.54817	0.139484	-0.305247	-0.336424	-0.420304	-1.33429	-0.979689
ENSG00000159251	ACTC1	D	2.85386	3.05107	-0.364855	-0.500196	-1.56098	-1.52263	-1.49195	1.09666	-1.56098
ENSG00000072954	TMEM38A	D	4.03317	1.8554	-2.37901	-0.335172	-0.975313	-0.136247	-1.25109	-0.616268	-0.195466
ENSG00000171811	CFAP46	D	2.4305	0.675251	-1.75401	2.02174	-1.04443	-1.86237	2.41325	-1.01758	-1.86237
ENSG00000143549	TPM3	D	3.85997	2.46648	-0.36463	-0.630835	-1.86607	-0.761217	-0.499612	-1.38463	-0.819451
ENSG00000078814	MYH7B	D	3.7784	2.65124	-1.38494	-0.84899	-0.405496	-0.917605	-0.865078	-1.21389	-0.793638
ENSG00000003989	SLC7A2	D	4.08855	1.01561	1.54662	-0.923568	-1.32538	-0.82118	-1.1075	-1.28102	-1.19211
ENSG00000146926	ASB10	D	4.27308	1.9419	-0.976566	-0.868358	-0.976566	-0.976566	-0.860841	-0.754298	-0.80178
ENSG00000278461	MRPS36	D	3.14883	-1.25207	-1.25207	2.1691	-1.25207	-1.00118	1.9436	-1.25207	-1.25207
ENSG00000171885	AQP4	D	4.28291	0.123622	-1.36837	0.204555	-0.822617	-1.0929	1.24742	-1.47798	-1.09663
ENSG00000070182	SPTB	D	4.12128	1.62474	-1.68792	-0.250196	-1.05311	-1.50064	0.0940482	-0.43748	-0.910723
ENSG00000226306	NPY6R	D	4.43754	1.08795	-1.34517	0.137441	-0.595579	-0.731701	-0.696309	-1.19348	-1.10069
ENSG00000008517	IL32	D	3.20127	1.4535	1.13343	0.0699163	-0.175622	0.463952	-1.83463	-1.97185	-2.33998
ENSG00000117115	PADI2	D	3.72013	2.08577	-2.0206	-0.0310518	-0.440479	-0.44908	-1.36805	-1.44251	-0.0541304
ENSG00000165192	ASB11	D	4.21363	1.83058	-0.792137	-0.878864	-0.937565	-0.951557	-1.03242	-0.46491	-0.986761
ENSG00000154153	RETREG1	D	3.27705	1.76685	1.80388	-0.674988	-1.92987	-1.57772	-0.438856	-1.32587	-0.90048
ENSG00000126803	HSPA2	D	3.01695	-0.0694108	-0.79007	1.71649	-2.37443	-1.91427	1.84057	-0.511496	-0.914323
ENSG00000185105	MYADML2	D	4.12113	1.97175	-1.11229	-0.904846	-0.766679	-0.696883	-0.932926	-0.961731	-0.71752
ENSG00000156804	FBXO32 ENSG00000156804	D	3.88484	1.66797	-0.798886	-1.65008	0.0768495	-0.553223	-1.5371	-1.34029	0.24993
ENSG00000153531	ADPRHL1	D	4.04376	1.80105	-0.123714	-0.42707	-0.854141	-1.3469	-0.889141	-0.891812	-1.31203
ENSG00000105711	SCN1B	D	4.05668	1.54355	0.0852424	-0.159989	-1.60455	-1.31157	-0.524025	-0.989039	-1.09631
ENSG00000135902	CHRND	D	4.20972	1.5545	-1.07874	-0.464736	-0.954054	-0.808691	-0.339034	-1.07874	-1.04022
ENSG00000106078	COBL	D	4.02121	1.22424	0.00793505	0.434996	-1.62364	-0.776344	-1.04684	-1.72083	-0.52074
ENSG00000087085	ACHE	D	3.85764	1.05585	-1.74786	-0.543738	-1.32565	0.675802	-1.02098	-1.51207	0.56101
ENSG00000185915	KLHL34	D	3.89643	2.09691	-0.831109	-0.837731	-0.897944	-0.765132	-0.879234	-0.880914	-0.901285
ENSG00000168386	FILIP1L	D	3.34098	1.43239	1.70914	-1.60055	-1.23533	-0.759803	-0.691486	-0.422468	-1.77287
ENSG00000165917	RAPSN	D	3.98944	1.78794	-0.975635	-0.860539	-0.930111	-0.992754	-0.904495	-1.04244	-0.0714135
ENSG00000115592	PRKAG3	D	4.29332	1.27038	-0.669092	-0.75221	-0.911708	-0.911708	-0.804715	-0.705702	-0.808571
ENSG00000277196		D	2.10001	-0.0259756	-0.595263	2.27472	-1.29845	-1.63167	2.27931	-1.51791	-1.58477
ENSG00000101892	ATP1B4	D	4.00168	1.82161	-0.891567	-0.865074	-0.637053	-0.89536	-0.862977	-0.759475	-0.91178
ENSG00000018625	ATP1A2	D	3.93676	1.34671	0.0714894	-1.02378	-1.57248	-0.0739096	-1.15099	-0.134581	-1.39922
ENSG00000188037	CLCN1	D	4.25452	1.27836	-0.727751	-0.788766	-0.843981	-0.793672	-0.813306	-0.756685	-0.80872
ENSG00000262855		D	4.00201	1.6631	-0.940616	-0.940616	-0.940616	-0.940616	-0.0214181	-0.940616	-0.940616
ENSG00000226094	RPL7P3	D	4.11909	1.54762	-0.84099	-0.84099	-0.620774	-0.84099	-0.84099	-0.84099	-0.84099
ENSG00000174437	ATP2A2	D	3.95585	1.73123	-1.31105	-0.642084	-0.696043	-0.287279	-1.04463	-0.911908	-0.794091
ENSG00000161896	IP6K3	D	3.69703	1.24716	-1.47454	0.923604	-1.22534	-1.06766	0.296415	-1.29901	-1.09765
ENSG00000177238	TRIM72	D	3.809	1.9679	-1.42804	-0.287383	-0.903431	-0.89809	-0.623337	-0.726911	-0.909707
ENSG00000122180	MYOG	D	3.59859	2.31865	-1.10589	-0.672062	-1.10589	-0.890896	-0.792917	-0.597621	-0.751964
ENSG00000163395	IGFN1	D	0.86446	3.08096	-0.246142	-1.56056	-1.51742	0.690959	-1.60909	-1.49449	1.79132
ENSG00000136717	BIN1	D	3.86061	1.39984	0.0657628	-0.536692	-0.712008	-1.4249	-0.381759	-0.43196	-1.83889
ENSG00000163995	ABLIM2	D	3.36607	1.28441	-0.717993	0.915858	-0.685573	-1.68542	0.419295	-0.61782	-2.27884
ENSG00000184343	SRPK3	D	3.26838	1.03881	-2.50463	1.19841	-1.03061	-0.751972	0.677582	-1.04497	-0.850987
ENSG00000145358	DDIT4L	D	3.24117	0.851796	0.360861	0.497108	-2.62657	-0.328136	-0.0217915	-2.09856	0.124124
ENSG00000115221	ITGB6	D	4.04565	1.41036	-0.962837	-0.923598	-0.385703	-0.962837	-0.863586	-0.941812	-0.415633
ENSG00000163050	COQ8A	D	3.57438	1.85737	0.557798	-1.09629	-0.487322	-0.9126	-1.10209	-1.34472	-1.04653
ENSG00000106992	AK1	D	3.64744	0.798269	0.76257	0.205268	-1.82142	-1.03225	0.196493	-1.28575	-1.47062
ENSG00000128591	FLNC	D	3.6941	1.23261	-2.18042	-1.27551	-0.0944218	-0.0917592	-1.09935	-0.024297	-0.160959
ENSG00000151967	SCHIP1	D	3.54036	1.84444	-1.25908	-0.715151	-0.236094	0.402248	-0.991026	-1.17759	-1.40811
ENSG00000175564	UCP3	D	3.9138	1.31448	-1.44454	-0.493019	-0.427095	-1.23267	-0.123248	-0.830369	-0.677337
ENSG00000164591	MYOZ3	D	3.12634	0.931086	-3.1038	-1.02321	0.183625	0.473458	-0.328599	-0.169253	-0.0896441
ENSG00000188549	CCDC9B	D	3.53606	1.39627	0.47029	0.125781	-0.625545	-0.857339	-0.897522	-1.5454	-1.6026
ENSG00000183785	TUBA8	D	3.5916	1.08871	0.625738	-0.997107	0.18542	-1.38111	-1.15584	-0.32498	-1.63243
ENSG00000248746	ACTN3	D	2.87504	1.35748	-1.56961	-1.4614	-1.17205	-0.624992	-0.789759	2.00357	-0.618262
ENSG00000138798	EGF	D	3.88245	1.48727	-0.785827	-0.82692	-0.82692	-0.709881	-0.82692	-0.82692	-0.566338
ENSG00000127324	TSPAN8	D	3.42227	0.915605	1.61205	-0.911011	-1.10595	-0.84329	-1.33435	-1.15868	-0.596649
ENSG00000143153	ATP1B1	D	3.60172	1.50633	0.403418	-1.25563	-0.313056	-0.573023	-1.4206	-1.00358	-0.945571
ENSG00000172458	IL17D	D	3.19109	2.10565	-0.67856	-1.28447	-0.938605	-0.317184	-1.56906	-0.813736	0.304883
[truncated: 1 more rows]
