# Supplementary material for: Development of synovial sarcoma organoids exhibiting ferroptosis resistance despite low malic enzyme 1 expression
Source: Sci Rep. 2025 Dec 21;16:2369. doi: 10.1038/s41598-025-32030-w (PMC12816075; doi:10.1038/s41598-025-32030-w)
Supplement: Supplementary file 4 — Supplementary Material 4 [file 41598_2025_32030_MOESM4_ESM.xlsx]

## Sheet: KmeansEnrichment_KEGG
Cluster	adj.Pval	nGenes	Pathways	Genes
B	1.14886e-08	33	Axon guidance	ENSG00000065320 ENSG00000066248 ENSG00000067606 ENSG00000082684 ENSG00000090776 ENSG00000092421 ENSG00000099617 ENSG00000101144 ENSG00000107731 ENSG00000108947 ENSG00000113763 ENSG00000114251 ENSG00000116106 ENSG00000121966 ENSG00000128594 ENSG00000128602 ENSG00000130827 ENSG00000133216 ENSG00000143590 ENSG00000144857 ENSG00000145147 ENSG00000164050 ENSG00000169750 ENSG00000169855 ENSG00000182580…
B	9.5187e-08	21	ECM-receptor interaction	ENSG00000005961 ENSG00000041982 ENSG00000049089 ENSG00000091136 ENSG00000092758 ENSG00000108821 ENSG00000112280 ENSG00000115884 ENSG00000130702 ENSG00000134871 ENSG00000136457 ENSG00000137801 ENSG00000139219 ENSG00000142156 ENSG00000164692 ENSG00000169231 ENSG00000186340 ENSG00000187498 ENSG00000188153 ENSG00000188157 ENSG00000203618
B	3.01354e-06	26	Hippo signaling pathway	ENSG00000002745 ENSG00000019549 ENSG00000067606 ENSG00000074047 ENSG00000081059 ENSG00000085741 ENSG00000089685 ENSG00000101144 ENSG00000104899 ENSG00000110092 ENSG00000111432 ENSG00000112175 ENSG00000113645 ENSG00000114251 ENSG00000115738 ENSG00000118971 ENSG00000125378 ENSG00000129474 ENSG00000132535 ENSG00000138795 ENSG00000148737 ENSG00000157240 ENSG00000180340 ENSG00000181449 ENSG00000184009…
B	8.57353e-06	41	PI3K-Akt signaling pathway	ENSG00000005961 ENSG00000041982 ENSG00000049089 ENSG00000064300 ENSG00000064547 ENSG00000066468 ENSG00000068078 ENSG00000077782 ENSG00000091136 ENSG00000092758 ENSG00000099617 ENSG00000101049 ENSG00000108821 ENSG00000110092 ENSG00000111664 ENSG00000112280 ENSG00000118971 ENSG00000119630 ENSG00000123374 ENSG00000130702 ENSG00000134259 ENSG00000134853 ENSG00000134871 ENSG00000136457 ENSG00000137801…
B	8.9376e-06	15	Basal cell carcinoma	ENSG00000002745 ENSG00000074047 ENSG00000081059 ENSG00000085741 ENSG00000111087 ENSG00000111432 ENSG00000114251 ENSG00000125378 ENSG00000128602 ENSG00000138795 ENSG00000141510 ENSG00000148737 ENSG00000157240 ENSG00000180340 ENSG00000188064
B	1.64224e-05	19	Protein digestion and absorption	ENSG00000049089 ENSG00000060718 ENSG00000084636 ENSG00000092758 ENSG00000108821 ENSG00000112280 ENSG00000130635 ENSG00000134871 ENSG00000139219 ENSG00000142156 ENSG00000144810 ENSG00000160963 ENSG00000164692 ENSG00000169436 ENSG00000182871 ENSG00000187498 ENSG00000188153 ENSG00000196739 ENSG00000197467
B	3.76793e-05	24	Wnt signaling pathway	ENSG00000002745 ENSG00000076716 ENSG00000081059 ENSG00000085741 ENSG00000110092 ENSG00000111432 ENSG00000114251 ENSG00000118971 ENSG00000120057 ENSG00000133067 ENSG00000138795 ENSG00000140332 ENSG00000141510 ENSG00000148737 ENSG00000156076 ENSG00000157240 ENSG00000162738 ENSG00000167941 ENSG00000169071 ENSG00000169750 ENSG00000180340 ENSG00000185269 ENSG00000188064 ENSG00000196781
B	4.91212e-05	22	Signaling pathways regulating pluripotency of stem cells	ENSG00000002745 ENSG00000066468 ENSG00000068078 ENSG00000071564 ENSG00000077782 ENSG00000081059 ENSG00000085741 ENSG00000105880 ENSG00000111432 ENSG00000114251 ENSG00000115738 ENSG00000122641 ENSG00000125378 ENSG00000136826 ENSG00000140836 ENSG00000143995 ENSG00000157240 ENSG00000163083 ENSG00000180340 ENSG00000181449 ENSG00000188064 ENSG00000278644
B	0.000143152	26	Focal adhesion	ENSG00000005961 ENSG00000041982 ENSG00000049089 ENSG00000091136 ENSG00000092758 ENSG00000108821 ENSG00000110092 ENSG00000112280 ENSG00000118971 ENSG00000119630 ENSG00000129946 ENSG00000130702 ENSG00000134853 ENSG00000134871 ENSG00000136457 ENSG00000137801 ENSG00000139219 ENSG00000142156 ENSG00000160691 ENSG00000164692 ENSG00000169231 ENSG00000169750 ENSG00000184009 ENSG00000186340 ENSG00000187498…
B	0.000143152	35	Human papillomavirus infection	ENSG00000002745 ENSG00000005961 ENSG00000041982 ENSG00000049089 ENSG00000067606 ENSG00000081059 ENSG00000085741 ENSG00000091136 ENSG00000092758 ENSG00000106003 ENSG00000108821 ENSG00000109062 ENSG00000110092 ENSG00000111432 ENSG00000112280 ENSG00000114251 ENSG00000114315 ENSG00000118971 ENSG00000123374 ENSG00000130702 ENSG00000134871 ENSG00000136457 ENSG00000137801 ENSG00000139219 ENSG00000141510…
B	0.00020354	49	Pathways in cancer	ENSG00000002745 ENSG00000005961 ENSG00000064547 ENSG00000066468 ENSG00000068078 ENSG00000074047 ENSG00000076604 ENSG00000077782 ENSG00000081059 ENSG00000085276 ENSG00000085741 ENSG00000087245 ENSG00000089685 ENSG00000091136 ENSG00000110092 ENSG00000111087 ENSG00000111432 ENSG00000111664 ENSG00000114251 ENSG00000114315 ENSG00000118971 ENSG00000119630 ENSG00000121966 ENSG00000123374 ENSG00000123975…
B	0.000345775	19	Cell adhesion molecules	ENSG00000038427 ENSG00000062038 ENSG00000091129 ENSG00000103855 ENSG00000108797 ENSG00000110076 ENSG00000110400 ENSG00000115884 ENSG00000128594 ENSG00000129910 ENSG00000131409 ENSG00000142949 ENSG00000149294 ENSG00000158769 ENSG00000162512 ENSG00000182985 ENSG00000196338 ENSG00000196358 ENSG00000280641
B	0.000530136	20	Gastric cancer	ENSG00000002745 ENSG00000066468 ENSG00000081059 ENSG00000085741 ENSG00000110092 ENSG00000111432 ENSG00000114251 ENSG00000123374 ENSG00000129946 ENSG00000138795 ENSG00000141510 ENSG00000148737 ENSG00000156427 ENSG00000157240 ENSG00000160691 ENSG00000162344 ENSG00000180340 ENSG00000186895 ENSG00000188064 ENSG00000231321
B	0.0006346	22	Alcoholism	ENSG00000099284 ENSG00000105464 ENSG00000111664 ENSG00000122585 ENSG00000129007 ENSG00000129946 ENSG00000131771 ENSG00000160691 ENSG00000161509 ENSG00000162188 ENSG00000180573 ENSG00000180596 ENSG00000196747 ENSG00000197238 ENSG00000197903 ENSG00000203814 ENSG00000272196 ENSG00000273802 ENSG00000276180 ENSG00000277075 ENSG00000278677 ENSG00000278828
B	0.00117624	22	Transcriptional misregulation in cancer	ENSG00000002745 ENSG00000007516 ENSG00000058091 ENSG00000064300 ENSG00000071564 ENSG00000104313 ENSG00000115738 ENSG00000118971 ENSG00000124813 ENSG00000126752 ENSG00000134323 ENSG00000135903 ENSG00000139318 ENSG00000141380 ENSG00000141510 ENSG00000143995 ENSG00000149948 ENSG00000166145 ENSG00000175832 ENSG00000231321 ENSG00000244405 ENSG00000278828
C	4.66468e-11	14	PPAR signaling pathway	ENSG00000065833 ENSG00000095637 ENSG00000099194 ENSG00000124253 ENSG00000132170 ENSG00000151726 ENSG00000165269 ENSG00000166819 ENSG00000167676 ENSG00000167772 ENSG00000170323 ENSG00000175445 ENSG00000181092 ENSG00000214456
C	1.10792e-06	9	Regulation of lipolysis in adipocytes	ENSG00000050628 ENSG00000074416 ENSG00000079435 ENSG00000152270 ENSG00000164128 ENSG00000165269 ENSG00000166819 ENSG00000170323 ENSG00000176485
C	1.50047e-06	10	Complement and coagulation cascades	ENSG00000000971 ENSG00000110799 ENSG00000112936 ENSG00000117525 ENSG00000125730 ENSG00000155659 ENSG00000159189 ENSG00000160255 ENSG00000173369 ENSG00000173372
C	0.000145449	7	Drug metabolism	ENSG00000008394 ENSG00000010932 ENSG00000069535 ENSG00000094963 ENSG00000189221 ENSG00000196616 ENSG00000248144
C	0.000747302	9	Alcoholic liver disease	ENSG00000099194 ENSG00000125730 ENSG00000159189 ENSG00000170458 ENSG00000173369 ENSG00000173372 ENSG00000181092 ENSG00000196616 ENSG00000248144
C	0.000747302	6	Cholesterol metabolism	ENSG00000130173 ENSG00000130203 ENSG00000130208 ENSG00000135218 ENSG00000167772 ENSG00000175445
C	0.00134184	37	Metabolic pathways	ENSG00000008394 ENSG00000056998 ENSG00000062282 ENSG00000065833 ENSG00000069535 ENSG00000074416 ENSG00000099194 ENSG00000099998 ENSG00000102575 ENSG00000106733 ENSG00000109107 ENSG00000117594 ENSG00000119927 ENSG00000122971 ENSG00000124253 ENSG00000131471 ENSG00000132840 ENSG00000133063 ENSG00000137767 ENSG00000144908 ENSG00000151726 ENSG00000152270 ENSG00000158571 ENSG00000165092 ENSG00000166741…
C	0.00142032	6	Metabolism of xenobiotics by cytochrome P450	ENSG00000008394 ENSG00000117594 ENSG00000138061 ENSG00000187134 ENSG00000196616 ENSG00000248144
C	0.00142032	6	Staphylococcus aureus infection	ENSG00000000971 ENSG00000125730 ENSG00000159189 ENSG00000160255 ENSG00000173369 ENSG00000173372
C	0.00162376	8	AMPK signaling pathway	ENSG00000079435 ENSG00000099194 ENSG00000124253 ENSG00000132170 ENSG00000135218 ENSG00000158571 ENSG00000174697 ENSG00000181092
C	0.00225327	5	Pyruvate metabolism	ENSG00000065833 ENSG00000124253 ENSG00000166816 ENSG00000196616 ENSG00000248144
C	0.00258105	5	Steroid hormone biosynthesis	ENSG00000117594 ENSG00000138061 ENSG00000151632 ENSG00000187134 ENSG00000196139
C	0.0032589	5	Malaria	ENSG00000108691 ENSG00000135218 ENSG00000160255 ENSG00000213088 ENSG00000261371
C	0.00486041	5	Arachidonic acid metabolism	ENSG00000099998 ENSG00000176485 ENSG00000188257 ENSG00000196139 ENSG00000211445
C	0.00540344	5	Glycerolipid metabolism	ENSG00000062282 ENSG00000074416 ENSG00000119927 ENSG00000169692 ENSG00000175445
D	1.2442e-17	19	Cardiac muscle contraction	ENSG00000018625 ENSG00000081248 ENSG00000092054 ENSG00000101892 ENSG00000108878 ENSG00000111245 ENSG00000114854 ENSG00000118729 ENSG00000130433 ENSG00000130528 ENSG00000143153 ENSG00000143549 ENSG00000156885 ENSG00000159251 ENSG00000160808 ENSG00000161281 ENSG00000174437 ENSG00000196296 ENSG00000198467
D	5.17079e-16	18	Hypertrophic cardiomyopathy	ENSG00000081248 ENSG00000092054 ENSG00000102683 ENSG00000108823 ENSG00000108878 ENSG00000111245 ENSG00000114854 ENSG00000115221 ENSG00000115592 ENSG00000130433 ENSG00000143549 ENSG00000155657 ENSG00000159251 ENSG00000160808 ENSG00000174437 ENSG00000175084 ENSG00000196296 ENSG00000198467
D	6.57975e-16	18	Dilated cardiomyopathy	ENSG00000081248 ENSG00000092054 ENSG00000102683 ENSG00000108823 ENSG00000108878 ENSG00000111245 ENSG00000114854 ENSG00000115221 ENSG00000130433 ENSG00000143549 ENSG00000155657 ENSG00000159251 ENSG00000160808 ENSG00000174437 ENSG00000175084 ENSG00000196296 ENSG00000198467 ENSG00000198523
D	1.75073e-13	19	Adrenergic signaling in cardiomyocytes	ENSG00000018625 ENSG00000070808 ENSG00000081248 ENSG00000092054 ENSG00000101892 ENSG00000105711 ENSG00000108878 ENSG00000111245 ENSG00000114854 ENSG00000130433 ENSG00000135447 ENSG00000143153 ENSG00000143549 ENSG00000159251 ENSG00000160808 ENSG00000174437 ENSG00000196296 ENSG00000198467 ENSG00000198523
D	2.153e-08	11	Arrhythmogenic right ventricular cardiomyopathy	ENSG00000077522 ENSG00000081248 ENSG00000102683 ENSG00000108823 ENSG00000108878 ENSG00000115221 ENSG00000130433 ENSG00000174437 ENSG00000175084 ENSG00000196296 ENSG00000248746
D	2.12302e-06	15	Calcium signaling pathway	ENSG00000070808 ENSG00000081248 ENSG00000101306 ENSG00000101470 ENSG00000114854 ENSG00000118729 ENSG00000130528 ENSG00000138798 ENSG00000143318 ENSG00000151729 ENSG00000174437 ENSG00000186439 ENSG00000196218 ENSG00000196296 ENSG00000198523
D	0.000314705	10	CGMP-PKG signaling pathway	ENSG00000018625 ENSG00000081248 ENSG00000092054 ENSG00000101306 ENSG00000101892 ENSG00000143153 ENSG00000151729 ENSG00000174437 ENSG00000196296 ENSG00000198523
D	0.00584061	7	Thyroid hormone signaling pathway	ENSG00000018625 ENSG00000092054 ENSG00000101892 ENSG00000143153 ENSG00000174437 ENSG00000196296 ENSG00000198523
