# Supplementary material for: Development of synovial sarcoma organoids exhibiting ferroptosis resistance despite low malic enzyme 1 expression
Source: Sci Rep. 2025 Dec 21;16:2369. doi: 10.1038/s41598-025-32030-w (PMC12816075; doi:10.1038/s41598-025-32030-w)
Supplement: Supplementary file 5 — Supplementary Material 5 [file 41598_2025_32030_MOESM5_ESM.xlsx]

## Sheet: Growth curve
Organoid
891-SS						935-SS						1253-SS
Relative ratio of Luminescence						Relative ratio of Luminescence						Relative ratio of Luminescence
Day	Day1	Day3	Day6	Day10		Day	Day1	Day3	Day6	Day10		Day	Day1	Day3	Day6	Day10
Well 1	0.955086	0.972149	0.809385	1.38655		Well 1	0.92218	1.60404	2.05292	2.78329		Well 1	0.933388	1.25273	1.93442	3.08901
Well 2	0.908228	0.778099	0.828843	1.47176		Well 2	0.994965	1.26655	1.9294	3.24596		Well 2	0.929389	1.22962	1.8188	3.17522
Well 3	1.13669	0.702889	0.801568	1.35137		Well 3	1.08286	1.31037	2.08593	3.77461		Well 3	1.13722	1.23949	1.64632	2.80126
Average	1	0.817712	0.813266	1.40323		Average	1	1.39365	2.02275	3.26795		Average	1	1.24061	1.79985	3.02183
S.D.	0.0985266	0.113438	0.0114679	0.050543		S.D.	0.0656922	0.149836	0.0673727	0.405		S.D.	0.0970455	0.00946821	0.118381	0.159888
Spheroid
891-SS						935-SS						1253-SS
Relative ratio of Luminescence						Relative ratio of Luminescence						Relative ratio of Luminescence
Day	Day1	Day3	Day6	Day10		Day	Day1	Day3	Day6	Day10		Day	Day1	Day3	Day6	Day10
Well 1	1.01772	0.873941	0.680839	0.684964		Well 1	1.08244	1.07132	0.699183	0.690602		Well 1	1.14351	0.85867	0.645529	0.572065
Well 2	0.98219	0.839335	0.72382	0.729497		Well 2	0.992226	1.07475	0.980991	0.788813		Well 2	0.868236	0.780509	0.733628	0.760985
Well 3	1.00009	0.834875	0.736656	0.72487		Well 3	0.925337	1.13735	0.950038	0.943516		Well 3	0.988251	0.822296	0.605546	0.759386
Average	1	0.849384	0.713772	0.713111		Average	1	1.09447	0.876737	0.807644		Average	1	0.820491	0.661568	0.697478
S.D.	0.0145072	0.0174597	0.0238696	0.0199921		S.D.	0.0643712	0.0303485	0.126184	0.104107		S.D.	0.112688	0.0319346	0.0535052	0.0886834
2D
891-SS	800 cells					935-SS	800 cells					1253-SS	1000 cells
Relative ratio of Luminescence						Relative ratio of Luminescence						Relative ratio of Luminescence
Day	Day1	Day2	Day3	Day4		Day	Day1	Day2	Day3	Day4		Day	Day1	Day2	Day3	Day4
Well 1	1.05456	1.14864	1.16078	1.28065		Well 1	0.935318	1.22263	1.65692	1.65073		Well 1	0.977803	1.37221	1.7281	2.00833
Well 2	1.00297	1.24575	1.20478	1.197		Well 2	0.918963	1.18572	1.56476	1.74665		Well 2	1.04559	1.39292	1.86779	2.2776
Well 3	0.942467	1.15338	1.22375	1.24973		Well 3	1.14572	1.07146	1.43281	2.06004		Well 3	0.976605	1.39429	1.80805	2.44725
Average	1	1.18259	1.19643	1.24246		Average	1	1.15994	1.5515	1.81914		Average	1	1.38648	1.80131	2.24439
S.D.	0.0458106	0.0447027	0.0263761	0.0345324		S.D.	0.103256	0.0643523	0.0919697	0.174786		S.D.	0.0322421	0.0101026	0.057225	0.180719

## Sheet: SS18-SSX K.D.
Spheroid
Relative ratio of Luminescence
細胞株	891_SS_1029		935_SS_0121		1253_SS_0613
	Ctrl	SS18-SSX KD	Ctrl	SS18-SSX KD	Ctrl	SS18-SSX KD
Well 1	1.00731	1.01139	1.02283	0.425676	1.04645	0.588268
Well 2	0.996777	0.998281	1.14609	0.656866	0.941061	0.518103
Well 3	0.995917	1.05727	0.831081	0.532505	1.01249	0.612826
Average	0.996347	1.02777	0.988587	0.594686	0.976775	0.565464
S.D.	0.000429784	0.0294939	0.157505	0.0621804	0.0357143	0.0473618
Organoid
Relative ratio of Luminescence
細胞株	891_SS_1029		935_SS_0121		1253_SS_0613
	Ctrl	SS18-SSX KD	Ctrl	SS18-SSX KD	Ctrl	SS18-SSX KD
Well 1	1.01994	1.02067	0.951139	0.959632	0.972184	0.700185
Well 2	1.11542	0.650224	1.07139	0.652767	0.885648	0.574211
Well 3	0.864644	1.17551	0.977473	0.73719	1.14217	0.879316
Average	1	0.948803	1	0.783196	1	0.717904
S.D.	0.103344	0.220388	0.0516109	0.129432	0.106555	0.125187

## Sheet: ME1, TP53 from TCGA
Sample Id	Group	ME1, mRNA expression (RNA Seq V2 RSEM) (log2)	TP53, mRNA expression (RNA Seq V2 RSEM) (log2)
TCGA-3B-A9HI-01	(A) no-SS	8.15378	9.64281
TCGA-3B-A9HJ-01	(A) no-SS	7.94869	10.9682
TCGA-3B-A9HL-01	(A) no-SS	8.64177	10.3041
TCGA-3B-A9HO-01	(A) no-SS	9.82627	10.6503
TCGA-3B-A9HP-01	(A) no-SS	8.10774	10.213
TCGA-3B-A9HQ-01	(A) no-SS	8.95986	8.16274
TCGA-3B-A9HR-01	(A) no-SS	7.07397	6.06048
TCGA-3B-A9HS-01	(A) no-SS	7.30253	10.7119
TCGA-3B-A9HT-01	(A) no-SS	10.034	8.7991
TCGA-3B-A9HU-01	(A) no-SS	7.91704	9.76971
TCGA-3B-A9HV-01	(A) no-SS	8.1653	10.6069
TCGA-3B-A9HX-01	(A) no-SS	9.1025	9.5473
TCGA-3B-A9HY-01	(A) no-SS	8.60611	10.6102
TCGA-3B-A9HZ-01	(A) no-SS	8.52596	9.56285
TCGA-3B-A9I0-01	(A) no-SS	6.94872	9.60893
TCGA-3B-A9I1-01	(A) no-SS	8.12326	10.1701
TCGA-3B-A9I3-01	(A) no-SS	8.25259	10.3307
TCGA-3R-A8YX-01	(A) no-SS	8.65615	9.70725
TCGA-DX-A1KU-01	(A) no-SS	9.09115	10.664
TCGA-DX-A1KW-01	(A) no-SS	7.32617	10.9396
TCGA-DX-A1KX-01	(A) no-SS	8.6212	8.64158
TCGA-DX-A1KY-01	(A) no-SS	7.41763	11.2926
TCGA-DX-A1KZ-01	(A) no-SS	10.0159	10.2553
TCGA-DX-A1L0-01	(A) no-SS	9.3233	10.4319
TCGA-DX-A1L1-01	(A) no-SS	9.07576	11.0685
TCGA-DX-A1L2-01	(A) no-SS	9.48937	10.583
TCGA-DX-A1L3-01	(A) no-SS	9.93088	10.17
TCGA-DX-A1L4-01	(A) no-SS	8.65018	10.3601
TCGA-DX-A23R-01	(A) no-SS	7.56823	10.0988
TCGA-DX-A23T-01	(A) no-SS	8.72004	10.4457
TCGA-DX-A23U-01	(A) no-SS	8.59062	10.2746
TCGA-DX-A23V-01	(A) no-SS	10.0197	10.7201
TCGA-DX-A23Y-01	(A) no-SS	10.305	11.0236
TCGA-DX-A23Z-01	(A) no-SS	9.70655	10.4726
TCGA-DX-A240-01	(A) no-SS	6.76794	10.4434
TCGA-DX-A2IZ-01	(A) no-SS	2.15124	12.1794
TCGA-DX-A2J0-01	(A) no-SS	6.38022	9.99728
TCGA-DX-A2J1-01	(A) no-SS	9.7211	10.104
TCGA-DX-A2J4-01	(A) no-SS	8.79365	10.5249
TCGA-DX-A3LS-01	(A) no-SS	9.12151	10.8294
TCGA-DX-A3LT-01	(A) no-SS	9.61059	10.7094
TCGA-DX-A3LU-01	(A) no-SS	9.14164	10.8018
TCGA-DX-A3LW-01	(A) no-SS	7.55119	10.6889
TCGA-DX-A3LY-01	(A) no-SS	9.86591	11.026
TCGA-DX-A3M1-01	(A) no-SS	7.5122	10.1255
TCGA-DX-A3M2-01	(A) no-SS	9.70727	11.5897
TCGA-DX-A3U5-01	(A) no-SS	9.93521	10.8239
TCGA-DX-A3U6-01	(A) no-SS	9.18316	10.6483
TCGA-DX-A3U7-01	(A) no-SS	9.1224	6.60013
TCGA-DX-A3U8-01	(A) no-SS	8.77653	10.178
TCGA-DX-A3U9-01	(A) no-SS	6.02838	7.67942
TCGA-DX-A3UA-01	(A) no-SS	10.469	10.3123
TCGA-DX-A3UB-01	(A) no-SS	8.03293	10.6824
TCGA-DX-A3UC-01	(A) no-SS	8.54736	10.7883
TCGA-DX-A3UD-01	(A) no-SS	7.37113	9.53919
TCGA-DX-A3UE-01	(A) no-SS	9.60879	10.3709
TCGA-DX-A3UF-01	(A) no-SS	8.04732	10.6032
TCGA-DX-A48J-01	(A) no-SS	8.95962	9.09024
TCGA-DX-A48K-01	(A) no-SS	9.30966	8.56596
TCGA-DX-A48L-01	(A) no-SS	7.42392	7.07935
TCGA-DX-A48N-01	(A) no-SS	7.60335	10.5363
TCGA-DX-A48O-01	(A) no-SS	9.15766	9.3115
TCGA-DX-A48P-01	(A) no-SS	8.69756	7.30304
TCGA-DX-A48R-01	(A) no-SS	8.46942	7.01643
TCGA-DX-A48U-01	(A) no-SS	8.58932	8.94511
TCGA-DX-A6B7-01	(A) no-SS	9.19651	9.12123
TCGA-DX-A6B8-01	(A) no-SS	10.114	7.89418
TCGA-DX-A6B9-01	(A) no-SS	9.89278	9.58881
TCGA-DX-A6BA-01	(A) no-SS	8.68138	7.55674
TCGA-DX-A6BB-01	(A) no-SS	8.47465	10.5486
TCGA-DX-A6BE-01	(A) no-SS	8.7333	10.4
TCGA-DX-A6BF-01	(A) no-SS	9.3783	10.3539
TCGA-DX-A6BG-01	(A) no-SS	8.54076	10.6969
TCGA-DX-A6BH-01	(A) no-SS	6.21526	10.0098
TCGA-DX-A6YQ-01	(A) no-SS	9.86499	9.21053
TCGA-DX-A6YR-01	(A) no-SS	9.93146	10.7833
TCGA-DX-A6YS-01	(A) no-SS	7.80899	7.35844
TCGA-DX-A6YT-01	(A) no-SS	7.96919	7.52753
TCGA-DX-A6YU-01	(A) no-SS	9.81457	11.0054
TCGA-DX-A6YV-01	(A) no-SS	7.36677	6.0513
TCGA-DX-A6YX-01	(A) no-SS	9.63963	7.57391
TCGA-DX-A6YZ-01	(A) no-SS	8.46448	9.46111
TCGA-DX-A6Z0-01	(A) no-SS	8.28751	9.25159
TCGA-DX-A6Z2-01	(A) no-SS	7.97379	9.48244
TCGA-DX-A7EF-01	(A) no-SS	7.53847	8.12976
TCGA-DX-A7EI-01	(A) no-SS	7.53704	10.1764
TCGA-DX-A7EL-01	(A) no-SS	8.53216	8.93746
TCGA-DX-A7EM-01	(A) no-SS	8.09762	9.90257
TCGA-DX-A7EN-01	(A) no-SS	6.40513	10.6174
TCGA-DX-A7ES-01	(A) no-SS	8.90631	10.5801
TCGA-DX-A7ET-01	(A) no-SS	8.24722	8.94081
TCGA-DX-A7EU-01	(A) no-SS	9.31393	10.5158
TCGA-DX-A8BG-01	(A) no-SS	8.75629	9.33068
TCGA-DX-A8BH-01	(A) no-SS	8.72319	8.29512
TCGA-DX-A8BJ-01	(A) no-SS	7.38945	7.17404
TCGA-DX-A8BK-01	(A) no-SS	8.24867	9.27709
TCGA-DX-A8BL-01	(A) no-SS	7.11731	11.6602
TCGA-DX-A8BM-01	(A) no-SS	9.69932	7.23437
TCGA-DX-A8BN-01	(A) no-SS	8.76445	7.90007
TCGA-DX-A8BO-01	(A) no-SS	8.43329	8.14255
TCGA-DX-A8BP-01	(A) no-SS	8.13889	11.038
TCGA-DX-A8BQ-01	(A) no-SS	9.62066	10.066
TCGA-DX-A8BR-01	(A) no-SS	10.2138	9.06091
TCGA-DX-A8BS-01	(A) no-SS	8.66342	7.91787
TCGA-DX-A8BT-01	(A) no-SS	9.86067	8.47216
TCGA-DX-A8BU-01	(A) no-SS	8.31564	8.93057
TCGA-DX-A8BV-01	(A) no-SS	7.89424	10.2992
TCGA-DX-A8BX-01	(A) no-SS	9.43839	10.6438
TCGA-DX-A8BZ-01	(A) no-SS	8.69216	8.89617
TCGA-DX-AATS-01	(A) no-SS	10.6832	8.14891
TCGA-DX-AB2E-01	(A) no-SS	5.52133	8.0297
TCGA-DX-AB2F-01	(A) no-SS	9.43552	9.62133
TCGA-DX-AB2G-01	(A) no-SS	9.38318	10.6135
TCGA-DX-AB2H-01	(A) no-SS	7.68102	11.2998
TCGA-DX-AB2J-01	(A) no-SS	9.87111	11.2879
TCGA-DX-AB2L-01	(A) no-SS	8.10107	10.651
TCGA-DX-AB2O-01	(A) no-SS	7.89691	9.25693
TCGA-DX-AB2P-01	(A) no-SS	8.3441	7.96357
TCGA-DX-AB2Q-01	(A) no-SS	6.74451	8.01234
TCGA-DX-AB2S-01	(A) no-SS	8.01729	10.9628
TCGA-DX-AB2T-01	(A) no-SS	9.58886	9.2165
TCGA-DX-AB2V-01	(A) no-SS	8.81791	9.39717
TCGA-DX-AB2W-01	(A) no-SS	8.22397	10.2204
TCGA-DX-AB2X-01	(A) no-SS	8.62702	10.5968
TCGA-DX-AB2Z-01	(A) no-SS	8.56507	8.60685
TCGA-DX-AB30-01	(A) no-SS	8.03153	11.0174
TCGA-DX-AB32-01	(A) no-SS	9.75197	10.3249
TCGA-DX-AB35-01	(A) no-SS	8.94702	10.9522
TCGA-DX-AB36-01	(A) no-SS	9.89876	11.289
TCGA-DX-AB37-01	(A) no-SS	9.67443	10.7002
TCGA-DX-AB3A-01	(A) no-SS	7.57534	11.0432
TCGA-FX-A2QS-01	(A) no-SS	9.24811	11.1783
TCGA-FX-A3NJ-01	(A) no-SS	9.22766	6.65689
TCGA-FX-A3NK-01	(A) no-SS	7.1461	10.4695
TCGA-FX-A3RE-01	(A) no-SS	8.87343	10.2824
TCGA-FX-A3TO-01	(A) no-SS	9.49352	9.65382
TCGA-FX-A48G-01	(A) no-SS	6.93204	11.5442
TCGA-FX-A76Y-01	(A) no-SS	8.39084	6.6857
TCGA-HB-A2OT-01	(A) no-SS	9.75894	8.87124
TCGA-HB-A3L4-01	(A) no-SS	7.84906	6.23951
TCGA-HB-A3YV-01	(A) no-SS	8.35006	10.651
TCGA-HB-A43Z-01	(A) no-SS	7.86231	9.38443
TCGA-HB-A5W3-01	(A) no-SS	9.38857	8.1155
TCGA-HS-A5N7-01	(A) no-SS	7.89556	9.9995
TCGA-HS-A5N8-01	(A) no-SS	9.55042	7.41825
TCGA-HS-A5N9-01	(A) no-SS	9.40688	8.57636
TCGA-HS-A5NA-01	(A) no-SS	9.10498	10.6459
TCGA-IE-A3OV-01	(A) no-SS	8.08456	7.59454
TCGA-IE-A4EH-01	(A) no-SS	8.19361	11.5443
TCGA-IE-A4EI-01	(A) no-SS	9.03266	8.64381
TCGA-IE-A4EJ-01	(A) no-SS	8.49524	10.8725
TCGA-IE-A4EK-01	(A) no-SS	9.13556	4.97119
TCGA-IE-A6BZ-01	(A) no-SS	8.09052	6.45434
TCGA-IF-A3RQ-01	(A) no-SS	8.60544	10.3703
TCGA-IF-A4AJ-01	(A) no-SS	8.92895	10.8893
TCGA-IF-A4AK-01	(A) no-SS	7.86771	8.21454
TCGA-IS-A3K6-01	(A) no-SS	8.16663	9.22621
TCGA-IS-A3K7-01	(A) no-SS	9.49235	8.45137
TCGA-IS-A3K8-01	(A) no-SS	9.45242	11.7347
TCGA-IS-A3KA-01	(A) no-SS	7.01911	9.72282
TCGA-IW-A3M4-01	(A) no-SS	8.64493	11.4769
TCGA-IW-A3M5-01	(A) no-SS	10.0546	11.2747
TCGA-IW-A3M6-01	(A) no-SS	9.69445	10.3374
TCGA-JV-A5VE-01	(A) no-SS	8.73212	6.88873
TCGA-JV-A5VF-01	(A) no-SS	9.48382	11.6454
TCGA-JV-A75J-01	(A) no-SS	7.99366	4.77609
TCGA-K1-A3PN-01	(A) no-SS	7.97988	9.69633
TCGA-K1-A3PN-02	(A) no-SS	6.63171	9.63718
TCGA-K1-A3PO-01	(A) no-SS	10.0007	10.4235
TCGA-K1-A42W-01	(A) no-SS	8.67755	8.43719
TCGA-K1-A42X-01	(A) no-SS	9.13288	11.1393
TCGA-K1-A42X-02	(A) no-SS	9.25892	11.1469
TCGA-K1-A6RT-01	(A) no-SS	10.0213	10.3431
TCGA-K1-A6RU-01	(A) no-SS	8.98054	8.91977
TCGA-K1-A6RV-01	(A) no-SS	8.62514	9.53172
TCGA-KD-A5QS-01	(A) no-SS	9.19254	7.049
TCGA-KD-A5QT-01	(A) no-SS	7.45174	9.49885
TCGA-KD-A5QU-01	(A) no-SS	8.61876	7.23589
TCGA-KF-A41W-01	(A) no-SS	7.7175	9.94583
TCGA-LI-A67I-01	(A) no-SS	9.76728	7.66727
TCGA-LI-A9QH-01	(A) no-SS	9.71688	10.134
TCGA-MB-A5Y8-01	(A) no-SS	8.12273	7.68994
TCGA-MB-A5Y9-01	(A) no-SS	9.75054	9.20747
TCGA-MB-A5YA-01	(A) no-SS	7.32301	7.43869
TCGA-MB-A8JK-01	(A) no-SS	7.33204	9.19154
TCGA-MB-A8JL-01	(A) no-SS	6.63327	10.7783
TCGA-MJ-A68H-01	(A) no-SS	7.31166	10.5142
TCGA-MJ-A68J-01	(A) no-SS	7.56778	10.4652
TCGA-MO-A47P-01	(A) no-SS	8.00197	8.97592
TCGA-MO-A47R-01	(A) no-SS	5.32468	10.4079
TCGA-N1-A6IA-01	(A) no-SS	9.74086	8.6512
TCGA-PC-A5DK-01	(A) no-SS	8.70049	9.8269
TCGA-PC-A5DL-01	(A) no-SS	9.77304	9.31143
TCGA-PC-A5DM-01	(A) no-SS	6.86573	6.45481
TCGA-PC-A5DN-01	(A) no-SS	8.86135	10.8255
TCGA-PC-A5DO-01	(A) no-SS	5.3906	9.04447
TCGA-PC-A5DP-01	(A) no-SS	8.34657	9.94109
TCGA-PT-A8TR-01	(A) no-SS	5.97138	11.0398
TCGA-QC-A6FX-01	(A) no-SS	7.83174	10.749
TCGA-QC-A7B5-01	(A) no-SS	7.66873	11.6812
TCGA-QC-AA9N-01	(A) no-SS	6.63474	7.00458
TCGA-QQ-A5V2-01	(A) no-SS	7.68349	9.00883
TCGA-QQ-A5V9-01	(A) no-SS	7.98686	8.92025
TCGA-QQ-A5VA-01	(A) no-SS	8.66608	10.8318
TCGA-QQ-A5VB-01	(A) no-SS	9.12263	9.25946
TCGA-QQ-A5VC-01	(A) no-SS	7.40544	5.09265
TCGA-QQ-A5VD-01	(A) no-SS	7.92112	10.4243
TCGA-QQ-A8VB-01	(A) no-SS	7.32984	9.90868
TCGA-QQ-A8VD-01	(A) no-SS	7.50614	10.2592
TCGA-QQ-A8VF-01	(A) no-SS	8.59617	8.43784
TCGA-QQ-A8VG-01	(A) no-SS	8.53283	10.7203
TCGA-QQ-A8VH-01	(A) no-SS	4.65047	11.6283
TCGA-RN-A68Q-01	(A) no-SS	9.1983	10.4753
TCGA-RN-AAAQ-01	(A) no-SS	5.32385	10.0761
TCGA-SG-A6Z4-01	(A) no-SS	9.57659	10.3484
TCGA-SG-A6Z7-01	(A) no-SS	6.58854	9.68105
TCGA-SG-A849-01	(A) no-SS	8.99603	9.19271
TCGA-SI-A71O-01	(A) no-SS	6.16805	6.85894
TCGA-SI-A71O-06	(A) no-SS	7.58118	8.29169
TCGA-SI-A71P-01	(A) no-SS	6.05501	10.2233
TCGA-SI-A71Q-01	(A) no-SS	8.96109	9.80379
TCGA-SI-AA8B-01	(A) no-SS	8.7553	6.93539
TCGA-SI-AA8C-01	(A) no-SS	8.21481	10.2355
TCGA-UE-A6QT-01	(A) no-SS	8.78648	10.541
TCGA-UE-A6QU-01	(A) no-SS	8.46544	8.77867
TCGA-VT-A80G-01	(A) no-SS	9.70835	6.43591
TCGA-VT-A80J-01	(A) no-SS	8.86575	9.31683
TCGA-VT-A80J-02	(A) no-SS	7.72874	9.51098
TCGA-VT-AB3D-01	(A) no-SS	8.75289	10.6137
TCGA-WK-A8XO-01	(A) no-SS	7.77625	9.90492
TCGA-WK-A8XQ-01	(A) no-SS	6.21942	11.0062
TCGA-WK-A8XS-01	(A) no-SS	9.61723	6.42199
TCGA-WK-A8XX-01	(A) no-SS	8.78633	10.4561
TCGA-WK-A8XY-01	(A) no-SS	7.2821	7.01509
TCGA-WK-A8XZ-01	(A) no-SS	8.70753	9.66466
TCGA-WK-A8Y0-01	(A) no-SS	9.1334	9.30702
TCGA-WP-A9GB-01	(A) no-SS	7.46541	11.2121
TCGA-X2-A95T-01	(A) no-SS	7.51045	11.1629
TCGA-X6-A7W8-01	(A) no-SS	7.75572	8.30714
TCGA-X6-A7WA-01	(A) no-SS	8.87914	10.6204
TCGA-X6-A7WB-01	(A) no-SS	6.87691	7.88806
TCGA-X6-A7WC-01	(A) no-SS	8.95947	11.057
TCGA-X6-A7WD-01	(A) no-SS	9.48156	7.33513
TCGA-X6-A8C2-01	(A) no-SS	9.84567	8.26309
TCGA-X6-A8C3-01	(A) no-SS	10.0443	8.15502
TCGA-X6-A8C4-01	(A) no-SS	7.43934	6.19782
TCGA-X6-A8C5-01	(A) no-SS	9.03793	10.185
TCGA-X6-A8C6-01	(A) no-SS	8.50507	8.72341
TCGA-X9-A971-01	(A) no-SS	9.39084	7.04308
TCGA-X9-A973-01	(A) no-SS	8.12816	10.5655
TCGA-Z4-A8JB-01	(A) no-SS	7.1492	10.3577
TCGA-Z4-A9VC-01	(A) no-SS	8.13296	11.6133
TCGA-Z4-AAPG-01	(A) no-SS	8.17441	8.65496
TCGA-DX-A7EO-01	(B) Synovial Sarcoma	7.19033	11.0169
TCGA-DX-A7EQ-01	(B) Synovial Sarcoma	5.65595	8.96086
TCGA-DX-A7ER-01	(B) Synovial Sarcoma	3.3193	11.8966
TCGA-DX-AB3B-01	(B) Synovial Sarcoma	5.14969	11.0831
TCGA-DX-AB3C-01	(B) Synovial Sarcoma	4.82075	11.8637
TCGA-FX-A8OO-01	(B) Synovial Sarcoma	5.82241	11.8026
TCGA-MJ-A850-01	(B) Synovial Sarcoma	6.7975	12.0571
TCGA-WK-A8XT-01	(B) Synovial Sarcoma	6.78598	12.0187
TCGA-X6-A8C7-01	(B) Synovial Sarcoma	4.42056	11.5167
TCGA-Z4-AAPF-01	(B) Synovial Sarcoma	8.19949	10.9765

## Sheet: Erastin_Day3
Organoid
	#891				#935				#1253
Erastin(µM)	0	0.5	1	2	0	0.5	1	2	0	0.5	1	2
Well1	0.798373	1.0545	1.03548	1.22427	1.05518	0.961082	0.83759	0.816251	1.07439	0.808309	0.678094	0.648061
Well2	1.0243	0.717113	1.06059	0.864161	0.880219	0.930563	0.864447	0.709117	0.961733	1.21122	0.703174	0.817039
Well3	1.17733	0.956076	0.843237	1.07874	1.0646	1.03633	0.896577	0.67225	0.963881	1.08887	0.781982	0.609436
Average	1	0.909228	0.979768	1.05572	1	0.975992	0.866204	0.732539	1	1.03613	0.721084	0.691512
S.D.	0.155659	0.141664	0.0970844	0.147911	0.0847855	0.0444476	0.0241135	0.0610767	0.0526057	0.16866	0.0442623	0.0901506
Spheroid
	#891				#935				#1253
Erastin(µM)	0	0.5	1	2	0	0.5	1	2	0	0.5	1	2
Well1	0.894176	0.765461	0.825351	0.884201	0.882107	1.13176	0.892919	0.971005	0.901707	0.862138	0.971764	0.66375
Well2	1.16256	0.859156	0.86757	0.903565	0.910687	1.14173	1.35975	1.00269	1.16588	1.20863	1.58386	0.964016
Well3	0.943268	0.791915	0.88728	0.741717	1.20721	1.12066	0.948339	1.22123	0.932418	0.870855	0.884334	0.895492
Average	1	0.805511	0.860067	0.843161	1	1.13138	1.067	1.06498	1	0.980542	1.14665	0.841086
S.D.	0.116679	0.0394407	0.025833	0.0721661	0.14698	0.00860684	0.208239	0.111246	0.11796	0.161323	0.311205	0.128478
2D
	Aska				Yamato				#891				#935				#1253
Erastin(µM)	0	0.5	1	2	0	0.5	1	2	0	0.5	1	2	0	0.5	1	2	0	0.5	1	2
Well1	1.00658	0.930606	0.743769	0.682262	0.932954	0.558738	0.456573	0.29356	0.980317	1.06168	0.96401	0.969846	0.907235	0.971251	0.916052	0.883373	0.997194	0.993115	0.870136	0.975063
Well2	0.906593	0.766026	0.762235	0.766096	1.32672	0.482657	0.445446	0.31775	1.04143	1.02048	0.965211	1.14837	0.939435	0.900527	0.956588	1.03057	0.982613	0.953626	0.979749	0.81572
Well3	1.08683	0.739696	0.748192	0.590493	0.740325	0.538399	0.440106	0.249966	0.978257	0.975511	0.997826	1.00967	1.15333	0.955151	0.874173	0.960134	1.02019	1.02375	0.916915	0.862065
Average	1	0.812109	0.751398	0.679617	1	0.526598	0.447375	0.287092	1	1.01923	0.975682	1.04263	1	0.94231	0.915605	0.958026	1	0.990164	0.922267	0.884283
S.D.	0.073728	0.084476	0.007872	0.071714	0.244045	0.032161	0.00686	0.028048	0.029305	0.03519	0.015665	0.076516	0.109215	0.030267	0.033647	0.060111	0.015469	0.028704	0.044909	0.066922

## Sheet: Erastin_Day7
Organoid
	#891				#935				#1253
Erastin(µM)	0	0.5	1	2	0	0.5	1	2	0	0.5	1	2
Well1	0.98832	1.05753	0.951312	0.962979	0.900861	0.604594	0.704163	0.576284	0.862366	0.815618	0.723681	0.564061
Well2	0.896992	1.28443	0.831271	0.899947	1.05921	0.841387	0.780899	0.546363	1.08871	0.871258	0.686422	0.534433
Well3	1.11469	1.0001	1.00317	0.850741	1.03993	0.920977	0.621718	0.574535	1.04893	0.860641	0.706064	0.478595
Average	1	1.11402	0.928584	0.904556	1	0.788986	0.70226	0.565727	1	0.849172	0.705389	0.525696
S.D.	0.0892565	0.122756	0.0719938	0.0459366	0.0705428	0.134372	0.0649994	0.0137113	0.0986676	0.024119	0.0152184	0.0354344
2D
	Aska				Yamato				#891				#935				#1253
Erastin(µM)	0	0.5	1	2	0	0.5	1	2	0	0.5	1	2	0	0.5	1	2	0	0.5	1	2
Well1	1.06873	0.747976	0.340643	0.216084	1.04906	0.622239	0.041547	0.010233	0.903491	0.930173	0.766392	0.840761	1.01884	0.885106	0.648729	0.561882	0.940684	0.841323	0.594557	0.512481
Well2	0.999862	0.632446	0.467658	0.212764	1.01103	0.712129	0.107096	0.026052	1.11652	0.897531	0.968777	0.841896	1.03413	0.874039	0.567289	0.562896	0.975361	0.898116	0.637125	0.49643
Well3	0.931408	0.448807	0.352162	0.225908	0.939912	0.787734	0.159054	0.013462	0.979989	0.936134	0.953307	0.732756	0.94703	0.81524	0.712681	0.471319	1.08396	0.787589	0.557679	0.619303
Average	1	0.609743	0.386821	0.218252	1	0.707367	0.102566	0.016582	1	0.921279	0.896159	0.805138	1	0.858128	0.642899	0.532032	1	0.842343	0.596454	0.542738
S.D.	0.056062	0.123186	0.057354	0.005581	0.045236	0.067647	0.048079	0.006824	0.088112	0.016968	0.091976	0.051184	0.037972	0.030661	0.059499	0.042933	0.06103	0.045128	0.032461	0.054535
